# Supplementary material
Source: PubMed Central journal article supplement (PMC3235802)
Supplement: NIHMS338087-supplement-1_si_001.pdf [file NIHMS338087-supplement-1_si_001.pdf]

## Supporting Information for

### Intercepting Wacker Intermediates With Arenes: C–H Functionalization and Dearomatization

Bryan S. Matsuura, Allison G. Condie, Ryan C. Buff, Gregory J. Karahalis and Corey R.J. Stephenson

#### Table of Contents:

|                                                                           |         |
|---------------------------------------------------------------------------|---------|
| 1. General Information.....                                               | S2      |
| 2. Complete Reference for 11(a).....                                      | S2      |
| 3. General Procedure for Preparation of Starting Materials .....          | S3-S4   |
| 4. Characterization Data for Starting Materials .....                     | S5-S10  |
| 5. General Procedure for Palladium Mediated Cyclizations.....             | S11     |
| 6. Data for compounds Afforded by Cyclizations .....                      | S11-S26 |
| 7. <sup>1</sup> H and <sup>13</sup> C NMR Spectra for all compounds ..... | S27-S87 |

## General Information

Chemicals were either used as received or purified according to *Purification of Common Laboratory Chemicals*.<sup>1</sup> Glassware was dried in an oven at 150°C or flame dried and cooled under a dry atmosphere prior to use. All reactions were performed using common dry, inert atmosphere techniques. Reactions were monitored by TLC and visualized by a dual short wave/long wave UV lamp and stained with an ethanolic solution of potassium permanganate or p-anisaldehyde. Column flash chromatography was performed using 230-400 mesh silica gel. NMR spectra were recorded on Varian Mercury 300, Varian Unity Plus 400, and Varian Mercury 400 spectrometers. Chemical shifts for <sup>1</sup>H NMR were reported as δ, parts per million, relative to the signal of CHCl<sub>3</sub> at 7.26 ppm. Chemical shifts for <sup>13</sup>C NMR were reported as δ, parts per million, relative to the center line signal of the CDCl<sub>3</sub> triplet at 77.0 ppm. Proton and carbon assignments were established using spectral data of similar compounds. The abbreviations s, br. s, d, dd, br. d, ddd, t, q, br. q, m, and br. m stand for the resonance multiplicity singlet, broad singlet, doublet, doublet of doublets, broad doublet, doublet of doublets, triplet, quartet, broad quartet, multiplet and broad multiplet, respectively. IR spectra were recorded on an Avatar 360 FT-IR spectrometer. Mass spectra were recorded at the Mass Spectrometry Facility at the Department of Chemistry of the Boston University in Boston, MA on a Waters Q-ToF API-US with ESI high resolution mass spectrometer. Concentration refers to removal of solvent under reduced pressure (house vacuum at ca. 20 mmHg)

---

<sup>1</sup> Armarego, W. L. F.; Perrin, D. D. *Purification of Laboratory Chemicals 4<sup>th</sup> Edition*; Butterworth-Heinemann: Oxford, 1996.

## General Procedure for Preparation of Starting materials

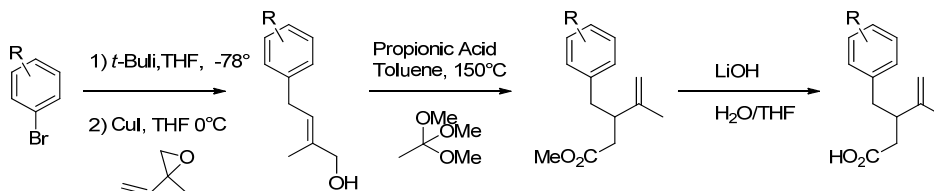

## General Procedure for Preparation of Starting Materials for Substrates 1a-6a

### Formation of AllylicArene

To an argon-purged, flame dried round bottom flask equipped with a rubber septum and magnetic stirbar, aryl bromide (1 equiv) was added as a solution in dry THF under argon (50mL/g of substrate). The flask was cooled to -78 °C and a solution of *t*-butyl lithium (2.2 equiv, 1.7M solution in hexanes) was added dropwise and stirred for 5 minutes. In a separate, argon-purged, flame dried flask, copper(I) iodide (15 mol %) and vinyl oxirane(1.5 equiv) were dissolved in THF and cooled to 0°C. To this, the aryl lithium solution was transferred dropwise via cannula over a span of 10 minutes. The solution stirred for 45 minutes and was quenched with a saturated solution of ammonium chloride. The THF was evaporated in vacuo and the aqueous layer was extracted with ethyl acetate (3X). The aqueous layer was discarded and the organic layer was washed with water (2X) and brine. The organic layer was concentrated in vacuo and the residue was purified by column chromatography on SiO<sub>2</sub>.

### Johnson Claisen Rearrangement

To a sealed tube, allylic arene (1 equiv) was added to a solution of toluene and of trimethyl orthoacetate (10 equiv). To this, propionic acid (0.1 equiv) was added and the reaction was refluxed at 150 °C for 12 hours. The reaction was diluted with ethyl acetate and washed with water (2 X), brine (1 X), and dried over Mg(SO<sub>4</sub>)<sub>2</sub>. The residue was concentrated in vacuo and purified by column chromatography.

### Saponification

To a round bottom flask, the Claisen product (1 equiv) and LiOH (4 equiv) were dissolved in 4:1 mixture of THF and water. To this, enough methanol was added to make the mixture a homogenous solution. Remaining solution was then diluted with ethyl acetate. The aqueous layer was washed with 1M aqueous solution of NaOH, and then extracted with ethyl acetate (3 X). The aqueous layer was acidified to a ~pH 3, using an aqueous 3M HCl solution, which was then extracted with ethyl acetate (3 X). The acidified ethyl acetate was then washed with water (3X), with brine (1X), and dried over Mg(SO<sub>4</sub>)<sub>2</sub> and concentrated in vacuo. The residue was then purified using column chromatography to afford the starting material.

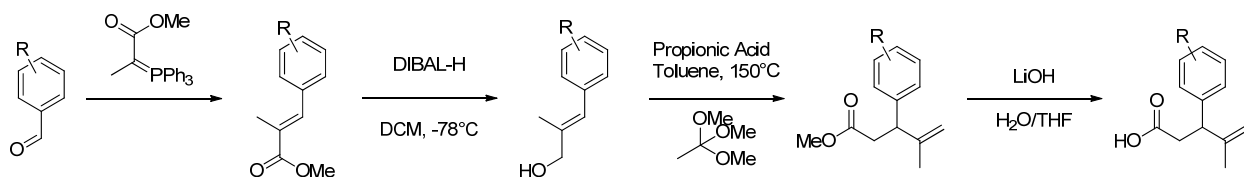

## General Procedure for Preparation of Starting Materials for Compounds 9a-16a

### Formation of the $\alpha,\beta$ unsaturated ester

To a slurry of DBU (3.6 equiv) and LiCl (3.6 equiv) in THF (0.6M with respect to benzaldehyde), 1.2 equivalents of phosphonate was added under nitrogen. The reaction was stirred for 1 hour upon which benzaldehyde (1 equiv) was added dropwise as a solution in THF. The reaction after 12 hours, the reaction was quenched with a saturated solution of  $\text{NH}_4\text{Cl}$ . The aqueous layer was extracted with ether (3X), washed with brine (1X) and dried over  $\text{Mg}(\text{SO}_4)_2$ . The filtrate was concentrated in vacuo and purified by column chromatography

### Reduction of the $\alpha,\beta$ unsaturated ester

A solution of  $\alpha,\beta$  unsaturated ester in dichloromethane (15 mL per mmol of substrate) was cooled to  $-78^\circ\text{C}$  under argon. To this, DIBAL-H (2.25 equiv) was added dropwise. After 1 hour the reaction was quenched with a saturated solution of Rochelle's salt and warmed to room temperature over a period of 2 hours. The aqueous layer was extracted with dichloromethane (3X) and the organic layers were combined and washed with brine (1X) and dried over  $\text{Mg}(\text{SO}_4)_2$ . The organic layer was then concentrated in vacuo and purified by column chromatography.

### Johnson Claisen Rearrangement

To a sealed tube, allylic arene (1 equiv) was added to a solution of toluene and of trimethyl orthoacetate (10 equiv). To this, propionic acid (0.1 equiv) was added and the reaction was refluxed at  $150^\circ\text{C}$  for 12 hours. The reaction was diluted with ethyl acetate and washed with water (2 X), one time with brine, and dried over  $\text{Mg}(\text{SO}_4)_2$ . The residue was concentrated in vacuo and purified by column chromatography.

### Saponification

To a round bottom flask, the Claisen product (1 equiv) and LiOH (4 equiv) were dissolved in 4:1 mixture of THF and water. To this, enough methanol was added to make the mixture a homogenous solution. Remaining solution was then diluted with ethyl acetate. The aqueous layer was washed with 1M aqueous solution of NaOH, and then extracted with ethyl acetate (3 X). The aqueous layer was acidified to a  $\sim\text{pH}$  3, using an aqueous 3M HCl solution, which was then extracted with ethyl acetate (3 X). The acidified ethyl acetate was then washed with water (3 X), with brine (1 X), and dried over  $\text{Mg}(\text{SO}_4)_2$  and concentrated in vacuo. The residue was then purified using column chromatography to afford the starting material.

### Data for Starting Materials

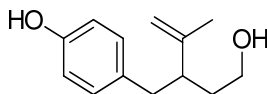

#### 4-(2-(2-hydroxyethyl)-3-methylbut-3-en-1-yl)phenol (1)

$R_f$ (Hexane/EtOAc 4:1): 0.23

IR (Neat): 3343, 2936, 2360, 2342, 1645, 1614, 1598, 1514, 1449, 1375, 1240, 1047, 893, 828  $\text{cm}^{-1}$ ;

$^1\text{H}$  NMR ( $\text{CDCl}_3$ , 500MHz)  $\delta$ : 6.99 (d,  $J = 8.5\text{Hz}$ , 2 H), 6.73 (d,  $J = 8.5$ , 2 H), 3.92 (br. s., 1 H), 4.74 (m, 1 H), 4.69 (m, 1 H), 3.59 (m, 2 H), 2.69 (dd,  $J = 13.7$ , 7.6 Hz, 1 H), 2.57 (dd,  $J = 13.4$ , 7.0 Hz, 1 H), 2.47 (dtd,  $J = 9.5$ , 7.5, 7.5, 5.2 Hz, 1 H), 1.68 (m, 3 H), 1.64 (m, 2 H);

$^{13}\text{C}$  NMR ( $\text{CDCl}_3$ , 125MHz)  $\delta$ : 154.0, 147.2, 132.2, 130.0, 115.1, 112.2, 61.5, 46.2, 39.7, 34.7, 18.6;

HRMS (ESI) not found.

LRMS (ESI)  $m/z$  for  $\text{C}_{13}\text{H}_{13}\text{O}_2\text{Na}^+$  ( $[\text{M}+\text{Na}]^+$ ) found 229.15

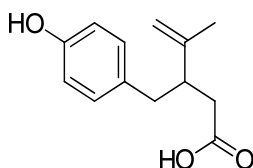

#### 3-(4-hydroxybenzyl)-4-methylpent-4-enoic acid (starting material for compound 3)

$R_f$ (Hexane/EtOAc 7:3): 0.36;

IR (Neat): 3251, 1706, 1648, 1613, 1514, 1442, 1229, 896, 829, 611  $\text{cm}^{-1}$ ;

$^1\text{H}$  NMR ( $\text{CDCl}_3$ , 500MHz)  $\delta$ : 7.01 (d,  $J = 8.5$  Hz, 2H), 6.73 (d,  $J = 8.5$  Hz, 2H), 4.74 (m, 2H), 2.8 (qint,  $J = 7.5 \times 4$  Hz, 1H), 2.7, (m, 1H), 2.56 (m, 1H), 2.13 (m, 2H), 1.71 (s, 3H);

$^{13}\text{C}$  NMR ( $\text{CDCl}_3$ , 125MHz)  $\delta$ : 178.1, 153.9, 145.9, 131.8, 130.2, 115.1, 112.0, 45.0, 39.1, 37.7, 20.0;

HRMS (ESI) not found.

LRMS (ESI)  $m/z$  for  $\text{C}_{14}\text{H}_{17}\text{O}_2^+$  ( $[\text{M}+\text{H}]^+$ ) found 220.10.

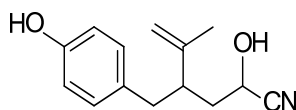

**2-hydroxy-4-(4-hydroxybenzyl)-5-methylhex-5-enitrile (isolated as a 1:1 mixture of diastereomers) (starting material for compound 4)**

$R_f$ (DCM/Acetone 9:1): 0.56;

IR (Neat): 2402, 2927, 2248, 1708, 1645, 1613, 1598, 1515, 1447, 1378, 1227, 1173, 1081, 905, 830, 734  $\text{cm}^{-1}$ ;

$^1\text{H}$  NMR ( $\text{CDCl}_3$ , 500MHz)  $\delta$ : 7.00 (d,  $J = 8.4$  Hz, 2 H), 6.74 (d,  $J = 8.4$ Hz 2 H), 4.86 (t,  $J = 1.5$  Hz, 1 H, diastereomer 1), 4.81 (t,  $J = 1.5$  Hz, 1 H, diastereomer 1), 4.80 (s, 1 H, diastereomer 2), ;4.78 (s, 1 H, diastereomer 2), 4.41 (dd,  $J = 7.0, 5.8$  Hz, 1 H, diastereomer 1), 4.36 (dd,  $J = 9.3, 6.3$  Hz, 1 H, diastereomer 2), 2.70 (m, 2H), 2.58 (m, 2H), 1.89 (m, 2H, overlap);

$^{13}\text{C}$  NMR ( $\text{CDCl}_3$ , 125MHz)  $\delta$ : 154.0, 145.9, 145.2, 131.5, 130.0, 115.3, 114.22, 113.7, 60.8, 59.7, 45.5, 44.9, 39.4, 39.3, 37.6, 37.4, 30.9, 18.6, 18.6;

HRMS (ESI) not found.

LRMS (ESI)  $m/z$  for  $\text{C}_{14}\text{H}_{18}\text{NO}_2$  ( $[\text{M}+\text{H}]^+$ ) found 232.12.

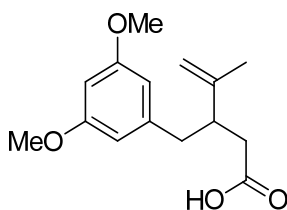

**4-methyl-3-(3,5-dimethoxybenzyl)pent-4-enoic acid (5)**

$R_f$ (Hexane/EtOAc 1:1): 0.44;

IR (Neat): 29378, 2838, 1704, 1594, 1459, 1428, 1292, 1204, 1146, 1057, 830, 753  $\text{cm}^{-1}$ ;

$^1\text{H}$  NMR ( $\text{CDCl}_3$ , 300MHz) $\delta$ : 6.32 (m, 3 H), 4.79 (t,  $J = 2 \times 2.2$  Hz, 1 H), 4.74 (s, 1 H), 3.77 (s, 6 H), 2.85 (ddd,  $J = 14.9, 7.9, 7.1$  Hz, 1 H), 2.72 (dd,  $J = 13.5, 6.9$  Hz, 1 H), 2.56 (dd,  $J = 13.5, 8.1$  Hz, 1 H), 2.44-2.41 (m, 2 H), 1.73 (s, 3 H);

$^{13}\text{C}$  NMR ( $\text{CDCl}_3$ , 100MHz)  $\delta$ : 178.9, 160.6, 145.9, 142.0, 112.0, 107.1, 98.1, 55.2, 44.5, 40.2, 37.9, 20.0;

HRMS (ESI)  $m/z$  calculated for  $\text{C}_{15}\text{H}_{21}\text{O}_4$  ( $[\text{M}+\text{H}]^+$ ) 265.1440, found 265.1443.

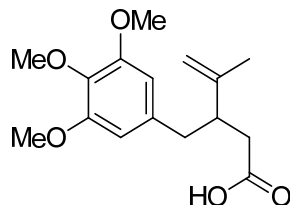

**4-methyl-3-(3,4,5-trimethoxybenzyl)pent-4-enoic acid (7)**

$R_f$ (Hexane/EtOAc 4:1):0.13;

IR (Neat): 3014, 2938, 2839, 1706, 1590, 1508, 1458, 1420, 1326, 1236, 1124, 1005, 749, 666  $\text{cm}^{-1}$ ;

$^1\text{H}$  NMR ( $\text{CDCl}_3$ , 500MHz)  $\delta$ : 6.37 (s, 2 H), 4.81 (s, 1 H), 4.75 (s, 1 H), 3.84 (s, 6 H), 3.82 (s, 3 H), 2.84 (dddd,  $J = 7.2$  Hz, 1 H), 2.72 (dd,  $J = 13.9, 6.9$  Hz, 1 H), 2.57(dd,  $J = 13.6, 8.0$  Hz, 1 H), 2.48-2.35 (m, 2 H), 1.74 (s, 3 H);

$^{13}\text{C}$  NMR ( $\text{CDCl}_3$ , 75MHz)  $\delta$ : 160.7, 147.5, 145.6, 110.6, 106.1, 98.0, 61.2, 55.2, 49.1, 35.7, 21.1;

HRMS (ESI)  $m/z$  calculated for  $\text{C}_{16}\text{H}_{23}\text{O}_5^+$  ( $[\text{M}+\text{H}]^+$ ) 237.1491, found 237.1498.

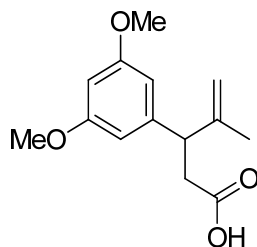

**3-(3,5-dimethoxyphenyl)-4-methylpent-4-enoic acid(11)**

$R_f$ (Hexane/EtOAc 3:1): 0.25;

IR (Neat):2941, 2838, 1708, 1596, 1461, 1430, 1291, 1205, 1157, 1067, 897, 835, 740, 698  $\text{cm}^{-1}$ ;

$^1\text{H}$  NMR ( $\text{CDCl}_3$ , 500MHz)  $\delta$ : 6.39 (d,  $J = 2.1$  Hz, 2 H), 6.34 (m, 1H), 4.92 (d,  $J = 5.2$  Hz, 2 H), 3.79 (s, 6H), 3.74, (m, 1 H), 2.88 (dd,  $J = 15.6, 8.5$  Hz, 1H), 2.75 (dd,  $J = 15.6, 8.5$  Hz, 1 H), 1.66 (s, 3 H);

$^{13}\text{C}$  NMR ( $\text{CDCl}_3$ , 75MHz)  $\delta$ : 178.2, 160.8, 146.1, 144.2, 110.7, 105.8, 98.5, 55.2, 48.3, 38.9, 21.7;

HRMS (ESI)  $m/z$  calculated for  $\text{C}_{14}\text{H}_{19}\text{O}_4^+$  ( $[\text{M}+\text{H}]^+$ ) 251.1295, found 251.1295.

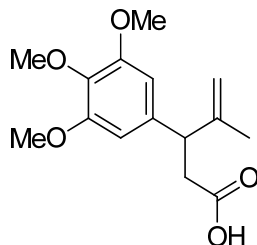

**4-methyl-3-(3,4,5-trimethoxyphenyl)pent-4-enoic acid (13)**

$R_f$ (Hexane/EtOAc 3:1): 0.1;

IR (Neat): 2640, 2839, 1709, 1648, 1591, 1509, 1461, 1422, 1330, 1239, 1127, 1010, 903, 663  $\text{cm}^{-1}$ ;

$^1\text{H}$  NMR ( $\text{CDCl}_3$ , 500MHz)  $\delta$ : 6.43 (s, 2 H), 4.92 (s, 2 H), 3.83 (s, 6 H), 3.83 (m, 9H), 2.87 (dd,  $J = 15.8, 8.2$  Hz, 1 H), 2.72 (dd,  $J = 15.9, 7.3$  Hz, 1 H), 1.65 (s, 3 H);

$^{13}\text{C}$  NMR ( $\text{CDCl}_3$ , 75MHz)  $\delta$ : 178.1, 153.1, 146.3, 137.5, 136.7, 110.6, 104.6, 60.8, 56.1, 48.4, 39.3, 21.8;

HRMS (ESI) not found.

LRMS (ESI)  $m/z$  for  $\text{C}_{15}\text{H}_{21}\text{O}_5^+$  ( $[\text{M}+\text{H}]^+$ ) found 281.13.

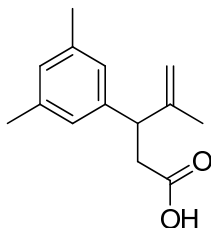

**3-(3,5-dimethylphenyl)-4-methylpent-4-enoic acid (15)**

$R_f$ (Hexane/EtOAc 9:1): 0.08;

IR (Neat): 3018, 2919, 1709, 1606, 1416, 1300, 1252, 1176, 893, 849, 704  $\text{cm}^{-1}$ ;

$^1\text{H}$  NMR ( $\text{CDCl}_3$ , 400MHz)  $\delta$ : 11.53(s, 1 H, OH), 6.87 (s, 1 H), 6.83(s, 2 H), 4.93 (s, 1 H), 4.89 (s, 1 H), 3.71 (t,  $J = 7.8$  Hz, 1 H), 2.88 (dd,  $J = 15.7, 8.5$  Hz, 1 H), 2.73 (dd,  $J = 15.7, 7.1$  Hz, 1 H), 2.29 (s, 6 H), 1.63 (s, 3 H);

$^{13}\text{C}$  NMR ( $\text{CDCl}_3$ , 75MHz)  $\delta$ : 178.4, 146.5, 141.7, 137.9, 128.5, 125.4, 110.4, 48.0, 39.1, 21.7, 21.3;

HRMS (ESI) not found.

LRMS (ESI)  $m/z$  for  $\text{C}_{14}\text{H}_{19}\text{O}_2^+$  ( $[\text{M}+\text{H}]^+$ ) found 241.13.



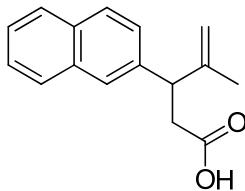

**4-methyl-3-(naphthalen-1-yl)pent-4-enoic acid (17)**

$R_f$ (Hexane/EtOAc/AcOH 81:15:4): 0.25;

IR (Neat): 3054, 2972, 2918, 1707, 1648, 1600, 1508, 1415, 1375, 1274, 1175, 945, 896, 858, 819, 746  $\text{cm}^{-1}$ ;

$^1\text{H}$  NMR ( $\text{CDCl}_3$ , 500MHz)  $\delta$ : 7.80 (m, overlap, 3 H), 7.67 (s, 1 H), 7.45 (m, 2 H), 7.35 (dd,  $J=8.6, 1.7$  Hz, 2 H), 5.00 (s, 1 H), 4.95 (s, 1 H), 3.94 (t,  $J=7.8$  Hz, 1 H), 2.98 (dd,  $J=15.9, 8.6$  Hz, 1 H), 2.86 (dd,  $J=15.9, 7.8$  Hz, 1 H), 1.64 (s, 3 H);

$^{13}\text{C}$  NMR ( $\text{CDCl}_3$ , 125MHz)  $\delta$ : 176.7, 146.3, 139.2, 133.4, 132.5, 128.2, 127.6, 126.2, 126.0, 126.0, 125.6, 110.9, 106.2, 48.3, 38.7, 21.7;

HRMS (ESI)  $m/z$  calculated for  $\text{C}_{16}\text{H}_{17}\text{O}_2^+$  ( $[\text{M}+\text{H}]^+$ ) 241.1229, found 241.1231.

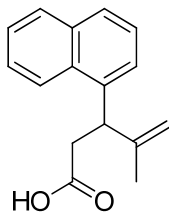

**4-methyl-3-(naphthalen-1-yl)pent-4-enoic acid (19)**

$R_f$ (Hexane/EtOAc4:1): 0.31;

IR (Neat): 3044, 2968, 1706, 16495, 1511, 1415, 1027, 1026, 897, 798, 779  $\text{cm}^{-1}$ ;

$^1\text{H}$  NMR ( $\text{CDCl}_3$ , 500MHz)  $\delta$ : 7.90 (d,  $J=8.3$  Hz, 1 H), 7.78 (d,  $J=8.3$  Hz, 1 H), 7.66 (d,  $J=7.8$  Hz, 1 H), 7.55 (ddd,  $J=8.1, 6.9, 1.2$  Hz, 1 H), 7.49 (ddd,  $J=8.3, 7.1, 1.2$  Hz, 1 H), 7.33 (d,  $J=8.3$  Hz, 1 H), 4.09 (dd,  $J=9.8, 2.7$  Hz, 1 H), 3.61 (d,  $J=17.6$  Hz, 1 H), 3.33 (d,  $J=17.4$  Hz, 1 H), 3.28 (dd,  $J=18.1, 9.8$  Hz, 1 H), 2.94 (d,  $J=18.2, 2.8$  Hz, 1 H), 1.75 (s, 3 H);

$^{13}\text{C}$  NMR ( $\text{CDCl}_3$ , 125MHz)  $\delta$ : 146.0, 137.6, 134.0, 131.7, 128.9, 127.5, 126.2, 125.6, 125.4, 124.2, 123.1, 111.8, 43.3, 39.0, 22.0;

HRMS (ESI)  $m/z$  calculated for  $\text{C}_{16}\text{H}_{17}\text{O}_2^+$  ( $[\text{M}+\text{H}]^+$ ) 241.1229, found 241.1229.

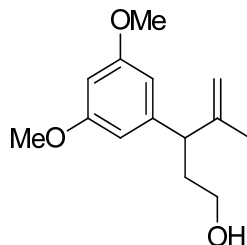

**3-(3,5-dimethoxyphenyl)-4-methylpent-4-en-1-ol (21)**

$R_f$ (Hexane/EtOAc4:1): 0.24;

IR (Neat): 3392, 2941, 2838, 2361, 1596, 1462, 1429, 1291, 1205, 1157, 1057, 894, 834, 698  $\text{cm}^{-1}$ ;

$^1\text{H}$  NMR ( $\text{CDCl}_3$ , 400MHz)  $\delta$ : 6.39 (d,  $J = 2.3$  Hz, 1 H), 6.32 (t,  $J = 2.3$  Hz, 1 H), 4.94(s, 1 H), 4.86 (t,  $J = 1.5$  Hz, 1 H), 3.77 (s, 6 H), 3.60 (m, 2 H), 3.34 (t,  $J = 7.6$  Hz, 1 H), 2.09 (dq,  $J = 13.7$ , 6.9 Hz, 1 H), 1.95 (ddt,  $J = 13.6$ , 7.9, 6.4 Hz, 1 H), 3.20 (s, 3 H);

$^{13}\text{C}$  NMR ( $\text{CDCl}_3$ , 75MHz)  $\delta$ : 160.7, 147.5, 145.6, 110.6, 106.1, 98.0, 61.2, 55.2, 49.1, 35.7, 21.1;

HRMS (ESI)  $m/z$  calculated for  $\text{C}_{14}\text{H}_{21}\text{O}_3$  ( $[\text{M}+\text{H}]^+$ ) 237.1491, found 237.1498.

## General Procedure for Palladium Mediated Cyclizations

A flame dried 100 mL round bottom flask is equipped with a rubber septum and magnetic stir bar and is charged with the aryl cyclization precursor (0.15 mmol, 1.0 equiv) and suspended in 100ml of acetonitrile. To this, iodobenzene diacetate (0.45 mmol, 3.0 equiv) and palladium diacetate (0.015 mmol, 0.10 equiv) were added and the reaction was stirred at room temperature for 12 hours. After the reaction is complete (as judged by TLC analysis), the mixture was concentrated *in vacuo*. The resultant residue was separated by column chromatography on silica gel, using the solvent system indicated, to afford the desired cyclized product.

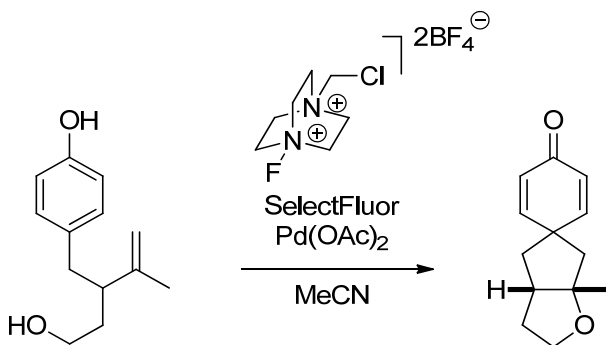

**6a'-methyl-2',3',3a',4',6',6a'-hexahydrospiro[cyclohexa[2,5]diene-1,5'-cyclopenta[b]furan]-4-one (2)** According to the general procedure, the aryl alcohol (100 mg, 0.49 mmol, 1.0 equiv), Selectfluor (258 mg, 0.73 mmol, 3.0 equiv) and palladium diacetate (11 mg, 0.05 mmol, 0.10 equiv) in dry acetonitrile (78 mL) afforded the cyclized product 43 mg in 43% yield as a yellow oil after purification by chromatography on SiO<sub>2</sub> (80:20, Hexanes/EtOAc) (12 h reaction time).

R<sub>f</sub>(DCM/Acetone 95:5): 0.72;

IR (Neat): 2963, 2930, 2863, 2360, 1662, 1451, 1408, 1376, 1259, 1179, 1141, 1110, 1018, 860 cm<sup>−1</sup>;

<sup>1</sup>H NMR (CDCl<sub>3</sub>, 500 MHz) δ: 7.02 (m, 1 H), 6.93 (m, 1 H), 6.20 (m, 2 H), 3.97 (m, 2 H), 2.64 (q, *J* = 8.31 Hz, 1 H), 2.17 (m, 2 H), 2.05 (dd, *J* = 13.3, 8.4 Hz, 1 H), 1.91 (d, *J* = 14.2 Hz, 1 H), 1.75 (m, 2 H), 1.4 (s, 3 H);

<sup>13</sup>C NMR (CDCl<sub>3</sub>, 75 MHz) δ: 153.1, 151.3, 128.7, 128.1, 94.9, 49.6, 48.1, 44.8, 44.4, 35.5, 26.3;

HRMS (ESI) not found.

LRMS (ESI) *m/z* for C<sub>13</sub>H<sub>17</sub>O<sub>2</sub><sup>+</sup> ([M+H]<sup>+</sup>) found 205.13.

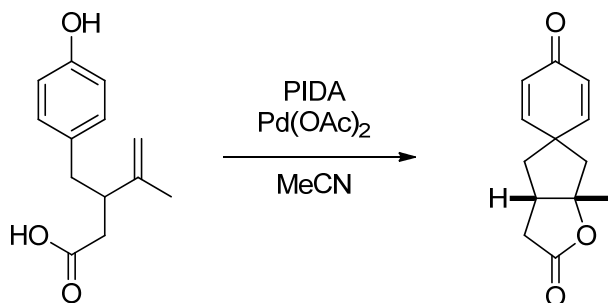

**6a'-methyl-2',3',3a',4',6',6a'-hexahydrospiro[cyclohexa[2,5]diene-1,5'-cyclopenta[b]furan]-4-one (3)** According to the general procedure, the aryl carboxylic acid (85 mg, 0.38 mmol, 1.0 equiv), phenyliodine diacetate (373 mg, 1.16 mmol, 3.0 equiv) and palladium diacetate (24 mg, 0.12 mmol, 0.30 equiv) in dry acetonitrile (85 mL) afforded 17 mgs of cyclized product **5b** after purification by chromatography on SiO<sub>2</sub> (65:35 EtOAc/Hex) (2 hour reaction time).

R<sub>f</sub>(EtOAc/Hexane 65:35): 0.23;

IR (Neat): 1769, 1665, 1623, 1442, 12267, 1232, 1133, 1096, 952, 861, 740, 703 cm<sup>-1</sup>;

<sup>1</sup>H NMR (CDCl<sub>3</sub>, 500 MHz) δ: 6.87 (ddd, *J* = 16.4, 10.0, 2.7 Hz, 2 H), 6.25 (ddd, *J* = 10.0, 5.7, 1.7 Hz, 2 H), 2.94 (dd, *J* = 17.6, 9.3 Hz, 1 H), 2.86 (ddd, *J* = 8.9 Hz, 1 H), 2.50 (d, *J* = 5.6 Hz, 1 H), 2.47 (d, *J* = 2.69 Hz, 1 H), 2.22 (dd, *J* = 13.7, 8.1 Hz, 1 H), 2.08 (d, *J* = 15.2, 1 H), 1.87 (s, 3 H);

<sup>13</sup>C NMR (CDCl<sub>3</sub>, 75 MHz) δ: 153.1, 151.3, 128.7, 128.1, 94.9, 49.6, 48.1, 44.8, 44.4, 35.5, 26.3;

HRMS (ESI) *m/z* calculated for C<sub>13</sub>H<sub>15</sub>O<sub>3</sub>([M+H]<sup>+</sup>) 219.1021, found 219.1012.

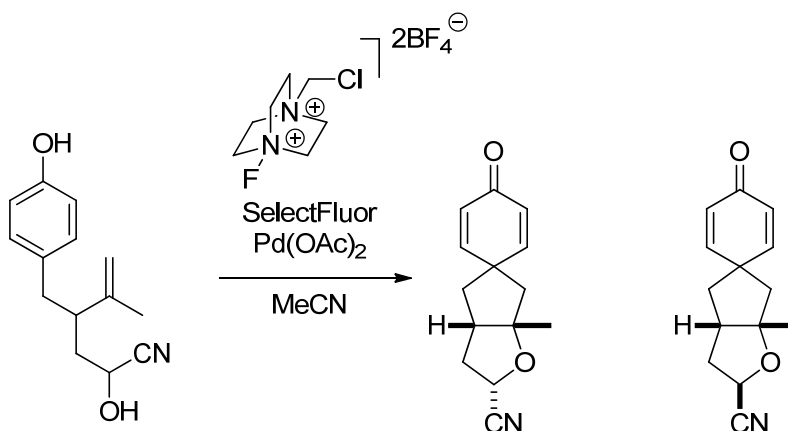

**6a'-methyl-4-oxo-2',3',3a',4',6',6a'-hexahydrospiro[cyclohexa[2,5]diene-1,5'-**

**cyclopenta[b]furan]-2'-carbonitrile (4)** According to the general procedure, the aryl cyanohydrin (80 mg, 0.35 mmol, 1.0 equiv), Selectfluor (184 mg, 0.52 mmol, 1.5 equiv) and palladium diacetate (7.7 mg, 0.035 mmol, 0.10 equiv) in dry acetonitrile (40 mL) afforded the cyclized product **13b** as a mixture of diastereoisomers (13 mg and 11 mg, 30% combined) as a yellow oil after purification by chromatography on SiO<sub>2</sub> (80:20, Hexanes/EtOAc) (12 h reaction time).

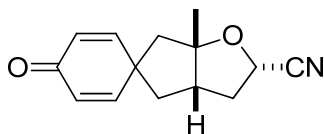

R<sub>f</sub>(DCM/Acetone 95:5): 0.24;

IR (Neat): 2973, 2362, 2340, 1663, 1623, 1452, 1408, 1380, 1259, 1182, 1101, 1071, 1024, 860 cm<sup>-1</sup>;

<sup>1</sup>H NMR (CDCl<sub>3</sub>, 500 MHz) δ: 6.91 (dd, *J*=10.3, 2.93 Hz, 1 H), 6.86 (dd, *J*=10.3, 2.9 Hz, 1 H), 6.22 (dd, *J*=4.9, 2.0 Hz, 1 H), 6.20 (dd, *J*=4.7, 2.0 Hz, 1 H), 4.89 (t, *J*=7.5 Hz, 1 H), 2.87 (qd, *J*=8.4, 2.0 Hz, 1 H), 2.62 (dt, *J*=13.5, 7.6 Hz, 1 H), 2.35 (ddd, *J*=13.4, 7.8, 2.1 Hz, 1 H), 2.29 (d, *J*=14.7 Hz, 1 H), 2.12 (dd, *J*=13.7, 8.3 Hz, 1 H), 1.97 (d, *J*=14.9 Hz, 1 H), 1.75 (dd, *J*=13.7, 9.1 Hz, 1 H), 1.58 (s, 3 H);

<sup>13</sup>C NMR (CDCl<sub>3</sub>, 100 MHz) δ: 185.6, 154.3, 151.6, 128.2, 127.6, 119.8, 96.4, 65.6, 50.3, 49.2, 49.1, 43.4, 36.8, 26.7;

HRMS (ESI) *m/z* calculated for C<sub>14</sub>H<sub>16</sub>NO<sub>2</sub><sup>+</sup> ([M+H<sup>+</sup>]) 230.1181, found 230.1185.

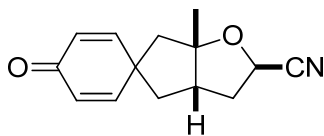

$R_f$ (DCM/Acetone 95:5): 0.30;

IR (Neat): 2967, 2933, 2871, 1660, 1622, 1452, 1408, 1380, 1259, 1181, 1100, 1070, 1024, 859  $\text{cm}^{-1}$ ;

$^1\text{H}$  NMR ( $\text{CDCl}_3$ , 500MHz)  $\delta$ : 7.02 (dd,  $J=9.9, 3.1$  Hz, 2 H), 6.93 (dd,  $J=9.9, 3.1$  Hz, 3 H), 6.26 (ddd,  $J=11.7, 10.3, 2.0$  Hz, 4 H), 4.85 (dd,  $J=8.7, 2.8$  Hz, 2 H), 2.81 (dtd,  $J=9.9, 8.3, 8.3, 1.3$  Hz, 3 H), 2.58 (dt,  $J=13.7, 8.1$  Hz, 3 H), 2.53 (d,  $J=14.7$  Hz, 3 H), 2.32 (dd,  $J=14.0, 10.0$  Hz, 1 H), 2.26 (ddd,  $J=13.5, 2.9, 1.2$  Hz, 4 H), 2.12 (ddd,  $J=13.7, 8.3, 1.5$  Hz, 3 H), 2.00 (dd,  $J=14.7, 1.5$  Hz, 3 H);

$^{13}\text{C}$  NMR ( $\text{CDCl}_3$ , 125MHz)  $\delta$ :185.5, 153.9, 152.4, 127.8, 127.6, 119.5, 96.6, 65.2, 49.8, 48.9, 48.8, 43.4, 37.7, 25.8;

HRMS (ESI)  $m/z$ calculated for  $\text{C}_{14}\text{H}_{16}\text{NO}_2^+$  ( $[\text{M}+\text{H}]^+$ ) Calculated 230.1181, found 230.1178.

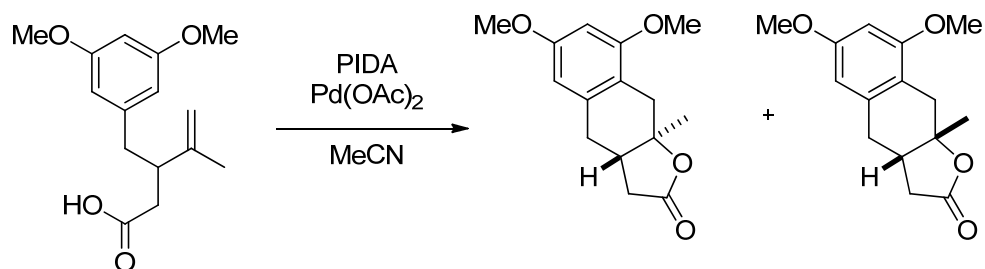

**5,7-dimethoxy-3,3a,8,8a-tetrahydro-2 H-indeno[2,1-b]furan-2-one (6)**

According to the general procedure, the aryl carboxylic acid (100 mg, 0.38 mmol, 1.0 equiv), phenyliodine diacetate (182.9 mg, 0.57 mmol, 1.5 equiv) and palladium diacetate (8.9 mg, 0.038 mmol, 0.10 equiv) in dry acetonitrile (100 mL) afforded the cyclized product **2b** and **2b'** (51 mg and 39 mg, 91% combined) as a white precipitate after purification by chromatography on SiO<sub>2</sub> (80:20, Hexanes/EtOAc) (12 h reaction time).

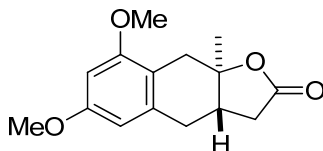

R<sub>f</sub>(Hexane/EtOAc4:1): 0.64;

IR (Neat): 2922, 2850, 1778, 1609, 1464, 1321, 1251, 1207, 1146, 1053, 945, 832, 741 cm<sup>-1</sup>;

<sup>1</sup>H NMR (CDCl<sub>3</sub>, 500 MHz) δ: 6.33 (d, *J* = 2.2 Hz, 1 H), 6.26 (d, *J* = 2.2 Hz, 1 H), 3.78 (s, 3 H), 3.77 (s, 3 H), 3.11 (d, *J* = 15.7 Hz, 1 H), 2.97 (dd, *J* = 16.3, 3.8 Hz, 1 H), 2.67-2.78 (m, 2 H), 2.59-2.44 (m, 3 H), 1.20 (s, 3 H);

<sup>13</sup>C NMR (CDCl<sub>3</sub>, 75 MHz) δ: 176.1, 159.3, 157.8, 137.7, 115.3, 104.8, 96.9, 87.5, 55.5, 55.4, 39.9, 34.9, 34.9, 34.3, 32.4, 28.6;

HRMS (ESI) *m/z* calculated for C<sub>15</sub>H<sub>19</sub>O<sub>4</sub><sup>+</sup> ([M+H]<sup>+</sup>) 263.1283, Found 263.1285.

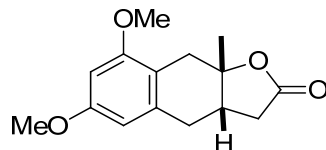

$R_f$ (Hexane/EtOAc4:1): 0.53;

IR (Neat):2927, 2848, 1766, 1596, 1496, 1464, 1323, 1204, 1147, 1095, 1052, 955, 835, 737  $\text{cm}^{-1}$ ;

$^1\text{H}$  NMR ( $\text{CDCl}_3$ , 500MHz)  $\delta$ : 6.34 (d,  $J = 2.2$  Hz, 1 H), 6.26 (d,  $J = 2.2$  Hz, 1 H), 3.79 (s, 3 H), 3.78 (s, 3 H), 3.16 (d,  $J = 15.4$  Hz, 1 H), 2.81 (dd,  $J = 18.5, 8.8$  Hz, 1 H), 2.63 (d,  $J = 15.4$  Hz, 1 H), 2.52 (m, 2 H), 1.12 (dd,  $J = 18.5, 5.0$  Hz, 1 H), 1.50 (s, 3 H);

$^{13}\text{C}$  NMR ( $\text{CDCl}_3$ , 75 MHz)  $\delta$ :176.2, 158.9, 136.4, 115.8, 104.7, 96.5, 84.8, 55.3, 62.1, 36.0, 32.9, 31.0, 17.8;

HRMS (ESI)  $m/z$  calculated for  $\text{C}_{15}\text{H}_{19}\text{O}_4^+$  ( $[\text{M}+\text{H}]^+$ ) 263.1283, Found 263.1277.



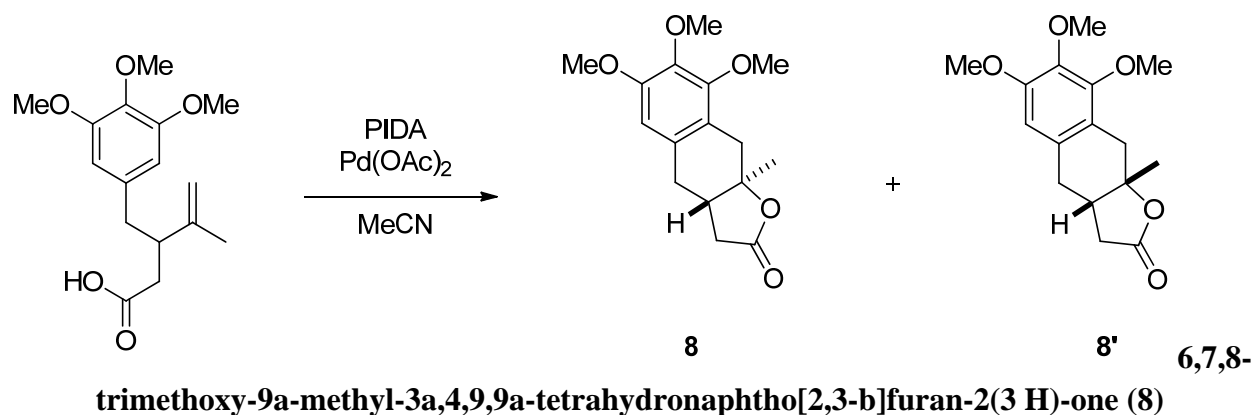

According to the general procedure, the aryl carboxylic acid (100 mg, 0.34 mmol, 1.0 equiv), phenyliodine diacetate (216 mg, 0.67 mmol, 2.0 equiv) and palladium diacetate (7.0 mg, 0.03 mmol, 0.10 equiv) in dry acetonitrile (100 mL) afforded the cyclized products **3b** and **3b'** in 37 mg and 28 mg respectively, for a combined yield of 65%. Crude NMR analysis revealed a 1.8:1 diastereomeric ratio in favor of product **3b**. Both diastereomers were a tan solid after purification by chromatography on SiO<sub>2</sub> (80:20, Hexanes) (12 h reaction time).

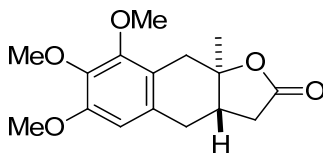

R<sub>f</sub>(Hexane/EtOAc 4:1): 0.31;

IR (Neat): 2937, 1779, 1603, 1493, 1461, 1340, 1255, 1244, 1119, 1069, 1032, 668 cm<sup>-1</sup>;

<sup>1</sup>H NMR (CDCl<sub>3</sub>, 500 MHz) δ: 6.52 (s, 1 H), 3.86 (s, 3 H), 3.84 (s, 3 H), 3.83 (s, 3 H), 3.11 (d, *J* = 15.6 Hz, 1 H), 3.84 (dd, *J* = 18.6, 10.4 Hz, 1 H), 2.75 (dd, *J* = 13.9, 4.7 Hz, 1 H), 2.63 (d, *J* = 15.3, 1 H), 2.56 (m, 1 H), 2.51 (dd, *J* = 14, 5.2 Hz), 2.20 (dd, *J* = 18.5, 4.7 Hz), 1.53 (s, 3 H);

<sup>13</sup>C NMR (CDCl<sub>3</sub>, 75 MHz) δ: 175.9, 152.1, 152.0, 140.7, 130.0, 120.8, 107.9, 84.5, 60.8, 60.5, 55.9, 42.3, 36.3, 32.9, 30.7, 17.6;

HRMS (ESI) *m/z* calculated for C<sub>16</sub>H<sub>21</sub>O<sub>5</sub><sup>+</sup> ([M+H]<sup>+</sup>) 293.1389, Found 293.1386.

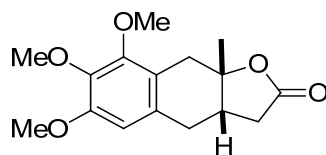

$R_f$ (Hexane/EtOAc 4:1): 0.25;

IR (Neat): 2936, 1778, 1602, 1493, 1461, 1412, 1340, 1255, 1119, 1069, 1031, 987, 668  $\text{cm}^{-1}$ ;

$^1\text{H}$  NMR ( $\text{CDCl}_3$ , 500MHz)  $\delta$ : 6.43 (s, 1 H), 3.85 (s, 3 H), 3.84 (s, 3 H), 3.82 (s, 3 H), 3.19 (d,  $J$  = 15.5 Hz, 1 H), 2.96 (dd,  $J$  = 16.0, 3.9 Hz, 1 H), 2.8 (d,  $J$  = 15.7, 1 H), 2.68 (m, 1 H), 2.57 (d,  $J$  = 8.4 Hz, 1 H), 2.48 (m, 1 H), 1.21 (s, 3 H)

$^{13}\text{C}$  NMR ( $\text{CDCl}_3$ , 75MHz)  $\delta$ : 175.9, 152.2, 151.5, 141.1, 131.3, 120.5, 107.7, 87.2, 61.3, 61.0, 56.1, 39.9, 34.9, 34.2, 33.4, 28.6;

HRMS (ESI)  $m/z$  calculated for  $\text{C}_{16}\text{H}_{21}\text{O}_5^+$  ( $[\text{M}+\text{H}]^+$ ) 292.1389, found 293.1376.

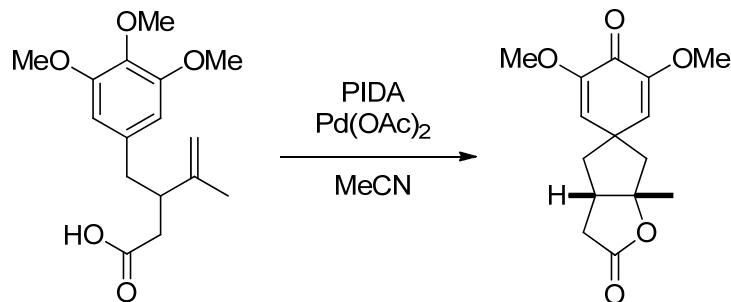

**(3a'S,6a'S)-3,5-dimethoxy-6a'-methyl-3a',4',6',6a'-tetrahydrospiro[cyclohexa[2,5]diene-1,5'-cyclopenta[b]furan]-2',4(3'H)-dione (8a)** According to the general procedure, the aryl carboxylic acid (100 mg, 0.34 mmol, 1.0 equiv), phenyliodine diacetate (216 mg, 0.67 mmol, 2.0 equiv) and palladium diacetate (7.0 mg, 0.03 mmol, 0.10 equiv) in dry acetonitrile (100 mL) afforded 23 mg of cyclized product **3c** as a brown solid in 32% yield, after purification by chromatography on SiO<sub>2</sub> (80:20, Hexanes/EtOAc → 99:1 EtOAc/MeOH) (12 h reaction time).

R<sub>f</sub>(EtOAc/MeOH 99:1): 0.20;

IR (Neat): 2936, 1778, 1602, 1493, 1461, 1340, 1255, 1119, 1069, 987, 668 cm<sup>-1</sup>;

<sup>1</sup>H NMR (CDCl<sub>3</sub>, 500 MHz) δ: 5.91-5.72 (m, 2 H), 3.66 (s, 6 H), 2.96 (dd, *J* = 18.1, 8.8 Hz, 1 H), 2.87 (dd, *J* = 8.5 Hz, 1 H), 2.49 (dd, *J* = 7.8, 6.6 Hz, 2 H), 2.22 (ddd, *J* = 13.5, 8.0, 1.5 Hz, 1 H), 2.11 (dd, *J* = 14.8, 1.6 Hz, 1 H), 1.91 (dd, *J* = 13.5, 9.3 Hz, 1 H), 1.6 (s, 3 H);

<sup>13</sup>C NMR (CDCl<sub>3</sub>, 75 MHz) δ: 176.0, 175.5, 150.3, 150.0, 120.9, 119.1, 94.9, 55.3, 55.2, 51.6, 46.4, 46.3, 44.8, 35.5, 26.5;

HRMS (ESI) *m/z* calculated for C<sub>15</sub>H<sub>18</sub>O<sub>5</sub>Na<sup>+</sup> ([M+Na<sup>+</sup>]) 301.1052, found 301.1061.

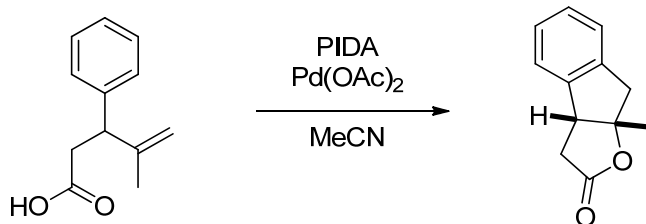

**8a-methyl-3,3a,8,8a-tetrahydro-2 H-indeno[2,1-b]furan-2-one (10)**

According to the general procedure, the aryl carboxylic acid (93 mg, 0.48 mmol, 1.0 equiv), phenyliodine diacetate (460 mg, 1.4 mmol, 3.0 equiv) and palladium diacetate (12 mg, 0.048 mmol, 0.10 equiv) in dry acetonitrile (100 mL) afforded the cyclized product **9b** (55 mg, 60%) as a colorless solid after purification by chromatography on SiO<sub>2</sub> (90:10, Hexanes/EtOAc) (12 h reaction time).

R<sub>f</sub>(Hexane/EtOAc 7:3): 0.32;

IR (Neat): 3024, 2970, 2929, 1768, 1483, 1419, 1384, 1255, 1222, 1170, 1119, 1067, 945, 914, 775, 751, 681 cm<sup>-1</sup>;

<sup>1</sup>H NMR (CDCl<sub>3</sub>, 500 MHz) δ: 7.29-7.10 (m, 4 H), 3.63 (d, *J* = 8.7 Hz, 1 H), 3.39 (d, *J* = 17.5 Hz, 1 H), 3.13 (d, *J* = 17.5 Hz, 1 H), 3.05 (dd, *J* = 17.9, 9.0 Hz, 1 H), 2.70 (dt, *J* = 17.8, 0.7 Hz, 1 H), 1.63 (s, 3 H);

<sup>13</sup>C NMR (CDCl<sub>3</sub>, 75MHz) δ: 175.7, 142.5, 140.2, 128.2, 127.6, 125.0, 124.6, 93.7, 50.5, 44.8, 35.4, 24.4;

HRMS (ESI) not found.

LRMS (ESI) *m/z* for C<sub>12</sub>H<sub>13</sub>O<sub>2</sub><sup>+</sup> ([M+H]<sup>+</sup>) found 189.09

Note: For characterization data for the starting material (compound **10**), see: Padwa, A.; Austin, D. J.; Price, A. T.; Semones, M. A.; Doyle, M. P.; Protopopova, M. N.; Winchester, W. R.; Tran, A. *J. Am. Chem. Soc.* **1993**, *115*, 8669.

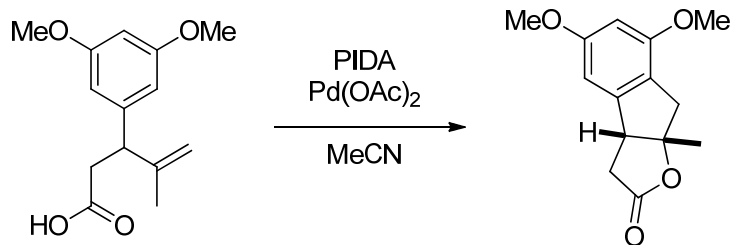

**5,7-dimethoxy-3a,8a-dimethyl-3,3a,8,8a-tetrahydro-2 H-indeno[2,1-b]furan-2-one(12)**

According to the general procedure, the aryl carboxylic acid (120 mg, 0.48 mmol, 1.0 equiv), phenyliodine diacetate (480 mg, 1.4 mmol, 3.0 equiv) and palladium diacetate (14 mg, 0.048 mmol, 0.10 equiv) in dry acetonitrile (100 mL) afforded the cyclized product **10b** (72 mg, 60%) as a colorless solid after purification by chromatography on SiO<sub>2</sub> (99.5:0.5, DCM/Et<sub>2</sub>O) (12 h reaction time).

R<sub>f</sub>(Hexane/EtOAc/AcOH 68:30:2): 0.31;

IR (Neat): 2940, 1771, 1600, 1495, 1467, 1431, 1331, 1219, 1148, 1066, 946, 836, 737 cm<sup>-1</sup>;

<sup>1</sup>H NMR (CDCl<sub>3</sub>, 500 MHz) δ: 6.33 (d, *J* = 2.0 Hz, 1 H), 6.29 (d, *J* = 1.7 Hz, 1 H), 3.79 (s, 6 H), 3.61 (d, *J* = 9.0 Hz, 1 H), 3.33 (d, *J* = 17.4 Hz, 1 H), 3.04 (dd, *J* = 17.9, 9.3 Hz, 1 H), 2.96 (d, *J* = 17.1 Hz, 1 H), 2.72 (dt, *J* = 17.9, 0.7 Hz, 1 H), 1.64 (s, 3 H);

<sup>13</sup>C NMR (CDCl<sub>3</sub>, 75 MHz) δ: 175.7, 161.4, 156.7, 144.5, 120.2, 100.1, 98.0, 94.1, 55.6, 55.2, 51.1, 41.4, 35.1, 24.7;

HRMS (ESI) *m/z* calculated for C<sub>14</sub>H<sub>17</sub>O<sub>4</sub><sup>+</sup> ([M+H]<sup>+</sup>) 249.1127, found 249.1118.

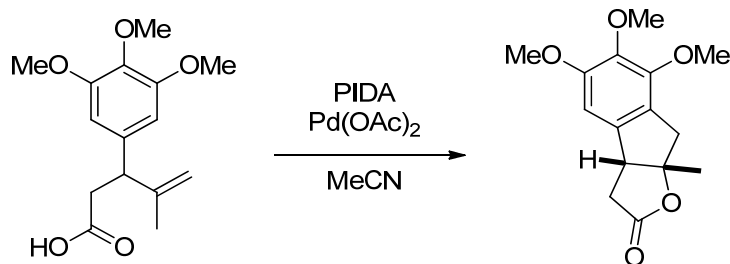

**5,6,7-trimethoxy-8a-methyl-3,3a,8,8a-tetrahydro-2H-indeno[2,1-b]furan-2-one (14)**

According to the general procedure, the aryl carboxylic acid (100 mg, 0.35 mmol, 1.0 equiv), phenyliodine diacetate (276.5 mg, 1.25 mmol, 3.0 equiv) and palladium diacetate (9.6 mg, 0.043 mmol, 0.10 equiv) in dry acetonitrile (100 mL) afforded the cyclized product **11b** (51 mg, 52%) as a clear oil after purification by chromatography on SiO<sub>2</sub> (80:20 Hexanes/ Acetone) (12 h reaction time).

R<sub>f</sub>(Hexane/EtOAc4:1): 0.25;

IR (Neat): 2967, 2842, 1590, 1484, 1416, 1345, 1264, 1235, 1171, 1067, 947, 807, 710 cm<sup>-1</sup>;

<sup>1</sup>H NMR (CDCl<sub>3</sub>, 500MHz) δ: 6.45 (s, 1 H), 3.89 (s, 3 H), 3.84 (s, 3 H), 3.84 (s, 3 H), 3.60 (d, *J* = 8.7 Hz, 1 H), 3.41 (d, *J* = 17.1 Hz, 1 H), 2.96-3.15 (m, 2 H), 2.71 (d, *J* = 17.5 Hz, 1 H), 1.66 (s, 3 H);

<sup>13</sup>C NMR (CDCl<sub>3</sub>, 75 MHz) δ: 175.6, 154.2, 149.8, 141.6, 137.8, 124.7, 103.1, 94.0, 61.0, 60.4, 56.3, 50.9, 42.1, 35.3, 24.6;

HRMS (ESI) *m/z* calculated for C<sub>15</sub>H<sub>19</sub>O<sub>5</sub><sup>+</sup> ([M+H]<sup>+</sup>) 279.1232, found 279.1233.

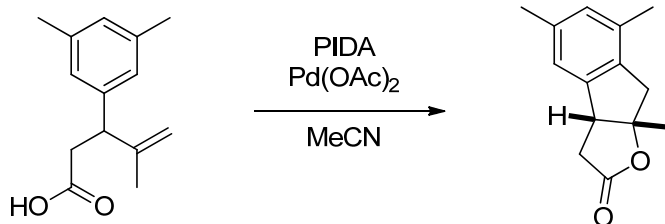

**5,7,8a-trimethyl-3,3a,8,8a-tetrahydro-2 H-indeno[2,1-b]furan-2-one (16)**

According to the general procedure, the aryl carboxylic acid (110 mg, 0.48 mmol, 1.0 equiv), phenyliodine diacetate (470 mg, 1.4 mmol, 3.0 equiv) and palladium diacetate (11 mg, 0.048 mmol, 0.10 equiv) in dry acetonitrile (100 mL) afforded the cyclized product **12b** (61 mg, 57%) as a colorless solid after purification by chromatography on SiO<sub>2</sub> (100% DCM) (12 h reaction time).

R<sub>f</sub>(DCM): 0.28;

IR (Neat): 2932, 2857, 2359, 1759, 1510, 1481, 1422, 1388, 1267, 1177, 1119, 1074, 1033, 945, 923, 857, 810, 729, 653 cm<sup>-1</sup>;

<sup>1</sup>H NMR (CDCl<sub>3</sub>, 500 MHz) δ: 6.88 (d, *J* = 0.6 Hz, 1 H), 6.81 (s, 1 H), 3.32 (d, *J* = 17.3 Hz, 1 H), 3.06 (dd, *J* = 17.8, 9.1 Hz, 1 H), 3.00 (d, *J* = 17.1 Hz, 1 H), 2.71 (dq, *J* = 17.6, 0.8 Hz, 1 H), 2.30 (s, 3 H), 2.20 (s, 3 H), 1.66 (s, 3 H);

<sup>13</sup>C NMR (CDCl<sub>3</sub>, 75 MHz) δ: 175.9, 142.5, 137.7, 136.1, 134.2, 129.9, 122.4, 93.8, 50.6, 43.4, 35.5, 24.7, 21.2, 18.9;

HRMS (ESI) *m/z* calculated for C<sub>14</sub>H<sub>17</sub>O<sub>2</sub><sup>+</sup> ([M+H]<sup>+</sup>) 217.1229, found 217.1234.

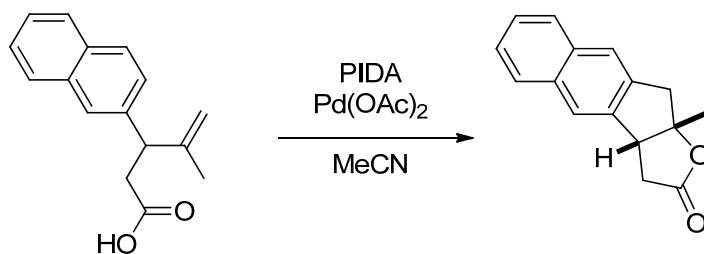

**10a-methyl-3,3a,10,10a-tetrahydro-2 H-benzo[5,6]indeno[2,1-b]furan-2-one (18)**

According to the general procedure, the aryl carboxylic acid (100 mg, 0.48 mmol, 1.0 equiv), phenyliodine diacetate (460 mg, 1.4 mmol, 3.0 equiv) and palladium diacetate (10.0 mg, 0.048 mmol, 0.10 equiv) in dry acetonitrile (100 mL) afforded the cyclized product **18** (55 mg, 52%) as a colorless solid after purification by chromatography on SiO<sub>2</sub> (100% DCM) (12 h reaction time).

R<sub>f</sub>(Hexane/EtOAc 4:1): 0.42;

IR (Neat): 2922, 2857, 2360, 2342, 1763, 1608, 1510, 1255, 1169, 1117, 1069, 945, 921, 872, 755 cm<sup>-1</sup>;

<sup>1</sup>H NMR (CDCl<sub>3</sub>, 400 MHz) δ: 7.83-7.75 (m, 2 H), 7.65 (d, *J* = 9.0 Hz, 2 H), 7.48-7.40 (m, 2 H), 3.81 (d, *J* = 8.7 Hz, 1 H), 3.59 (d, *J* = 17.5 Hz, 1 H), 3.32 (d, *J* = 17.6 Hz, 1 H), 3.19 (dd, *J* = 17.8, 8.7 Hz, 1 H), 2.86 (d, *J* = 17.8 Hz, 1 H), 1.72 (s, 3 H);

<sup>13</sup>C NMR (CDCl<sub>3</sub>, 75 MHz) δ: 175.5, 141.9, 138.8, 133.7, 133.2, 127.7, 127.6, 125.9, 125.6, 123.6, 123.5, 94.0, 50.13, 44.3, 36.1, 24.4;

HRMS (ESI) *m/z* calculated for C<sub>16</sub>H<sub>15</sub>O<sub>2</sub><sup>+</sup> ([M+H]<sup>+</sup>) 239.1072, found 239.1073.



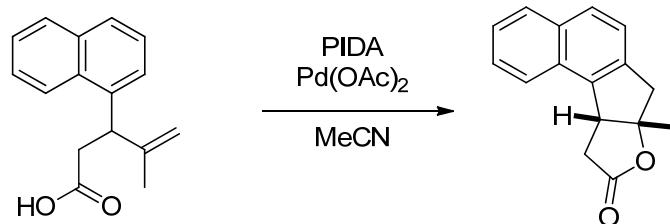

**7a-methyl-10,10a-dihydro-7H-benzo[6,7]indeno[2,1-b]furan-9(7aH)-one (20)**

According to the general procedure, the aryl carboxylic acid (120 mg, 0.50 mmol, 1.0 equiv), phenyliodine diacetate (320 mg, 0.99 mmol, 2.0 equiv) and palladium diacetate (11 mg, 0.05 mmol, 0.10 equiv) in dry acetonitrile (100 mL) afforded the cyclized product **14b** (63 mg, 53%) as a colorless solid after purification by chromatography on SiO<sub>2</sub> (90:10, Hexanes/EtOAc) (12 h reaction time).

R<sub>f</sub> (Hexane/EtOAc 4:1): 0.13;

IR (Neat): 3057, 2979, 2931, 1773, 1517, 1384, 1267, 1241, 1178, 1072, 955, 779, 739 cm<sup>-1</sup>;

<sup>1</sup>H NMR (CDCl<sub>3</sub>, 500 MHz) δ: 7.90 (d, *J* = 8.3 Hz, 1 H), 7.78 (d, *J* = 8.3 Hz, 1 H), 7.66 (d, *J* = 7.8 Hz, 1 H), 7.55 (ddd, *J* = 8.1, 6.9, 1.2 Hz, 1 H), 7.49 (ddd, *J* = 8.3, 7.1, 1.2 Hz, 1 H), 7.33 (d, *J* = 8.3 Hz, 1 H), 4.09 (dd, *J* = 9.8, 2.7 Hz, 1 H), 3.61 (d, *J* = 17.6 Hz, 1 H), 3.33 (d, *J* = 17.4 Hz, 1 H), 3.28 (dd, *J* = 18.1, 9.8 Hz, 1 H), 2.94 (d, *J* = 18.2, 2.8 Hz, 1 H), 1.75 (s, 3 H);

<sup>13</sup>C NMR (CDCl<sub>3</sub>, 125 MHz) δ: 175.9, 137.2, 137.0, 133.4, 129.5, 129.2, 129.2, 126.8, 125.4, 123.0, 123.0, 93.3, 50.1, 46.4, 34.7, 25.9;

HRMS (ESI) *m/z* calculated for C<sub>16</sub>H<sub>15</sub>O<sub>2</sub><sup>+</sup> ([M+H]<sup>+</sup>) 239.1072, found 239.1076.

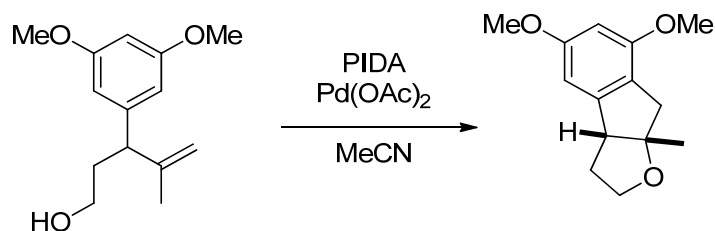

**5,7-dimethoxy-8a-methyl-3,3a,8,8a-tetrahydro-2 H-indeno[2,1-b]furan(22)**

According to the general procedure, the aryl carboxylic acid (110 mg, 0.48 mmol, 1.0 equiv), phenyliodine diacetate (480 mg, 1.4 mmol, 3.0 equiv) and palladium diacetate (16 mg, 0.048 mmol, 0.10 equiv) in dry acetonitrile (100 mL) afforded the cyclized product **15b** (52 mg, 46%) as a colorless oil after purification by chromatography on SiO<sub>2</sub> (gradient of 90:10 → 80:20 Hexanes/EtOAc) (12 h reaction time).

R<sub>f</sub>(Hexane/EtOAc4:1): 0.43;

IR (Neat): 2940, 1660, 1596, 1462, 1429, 1344, 1205, 1157, 1059, 833, 744 cm<sup>-1</sup>;

<sup>1</sup>H NMR (CDCl<sub>3</sub>, 500MHz)δ: 6.32 (d, *J* = 1.5 Hz, 1 H), 6.29 (d, *J* = 1.9 Hz, 1 H), 3.91 (m, 2 H), 3.79 (s, 3 H), 3.78 (s, 3 H), 3.13 (td, *J* = 9.1, 9.1, 5.9 Hz, 1 H), 3.38, (dd, *J* = 8.6, 2.5 Hz, 2 H), 3.07 (d, *J* = 16.8 Hz, 1 H), 2.88 (d, *J* = 16.8 Hz, 1 H), 2.23 (m, 1 H), 2.00 (ddt, *J* = 12.1, 6.0, 2.8, 2.8 Hz, 1 H), 1.46 (s, 3 H);

<sup>13</sup>C NMR (CDCl<sub>3</sub>, 75MHz) δ: 160.7, 147.5, 145.6, 110.6, 106.1, 98.0, 61.3, 55.2, 49.2, 35.7, 21.1;

HRMS (ESI) not found.

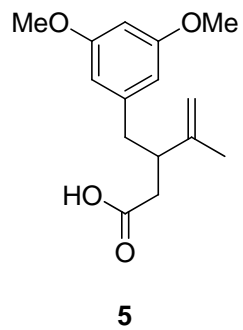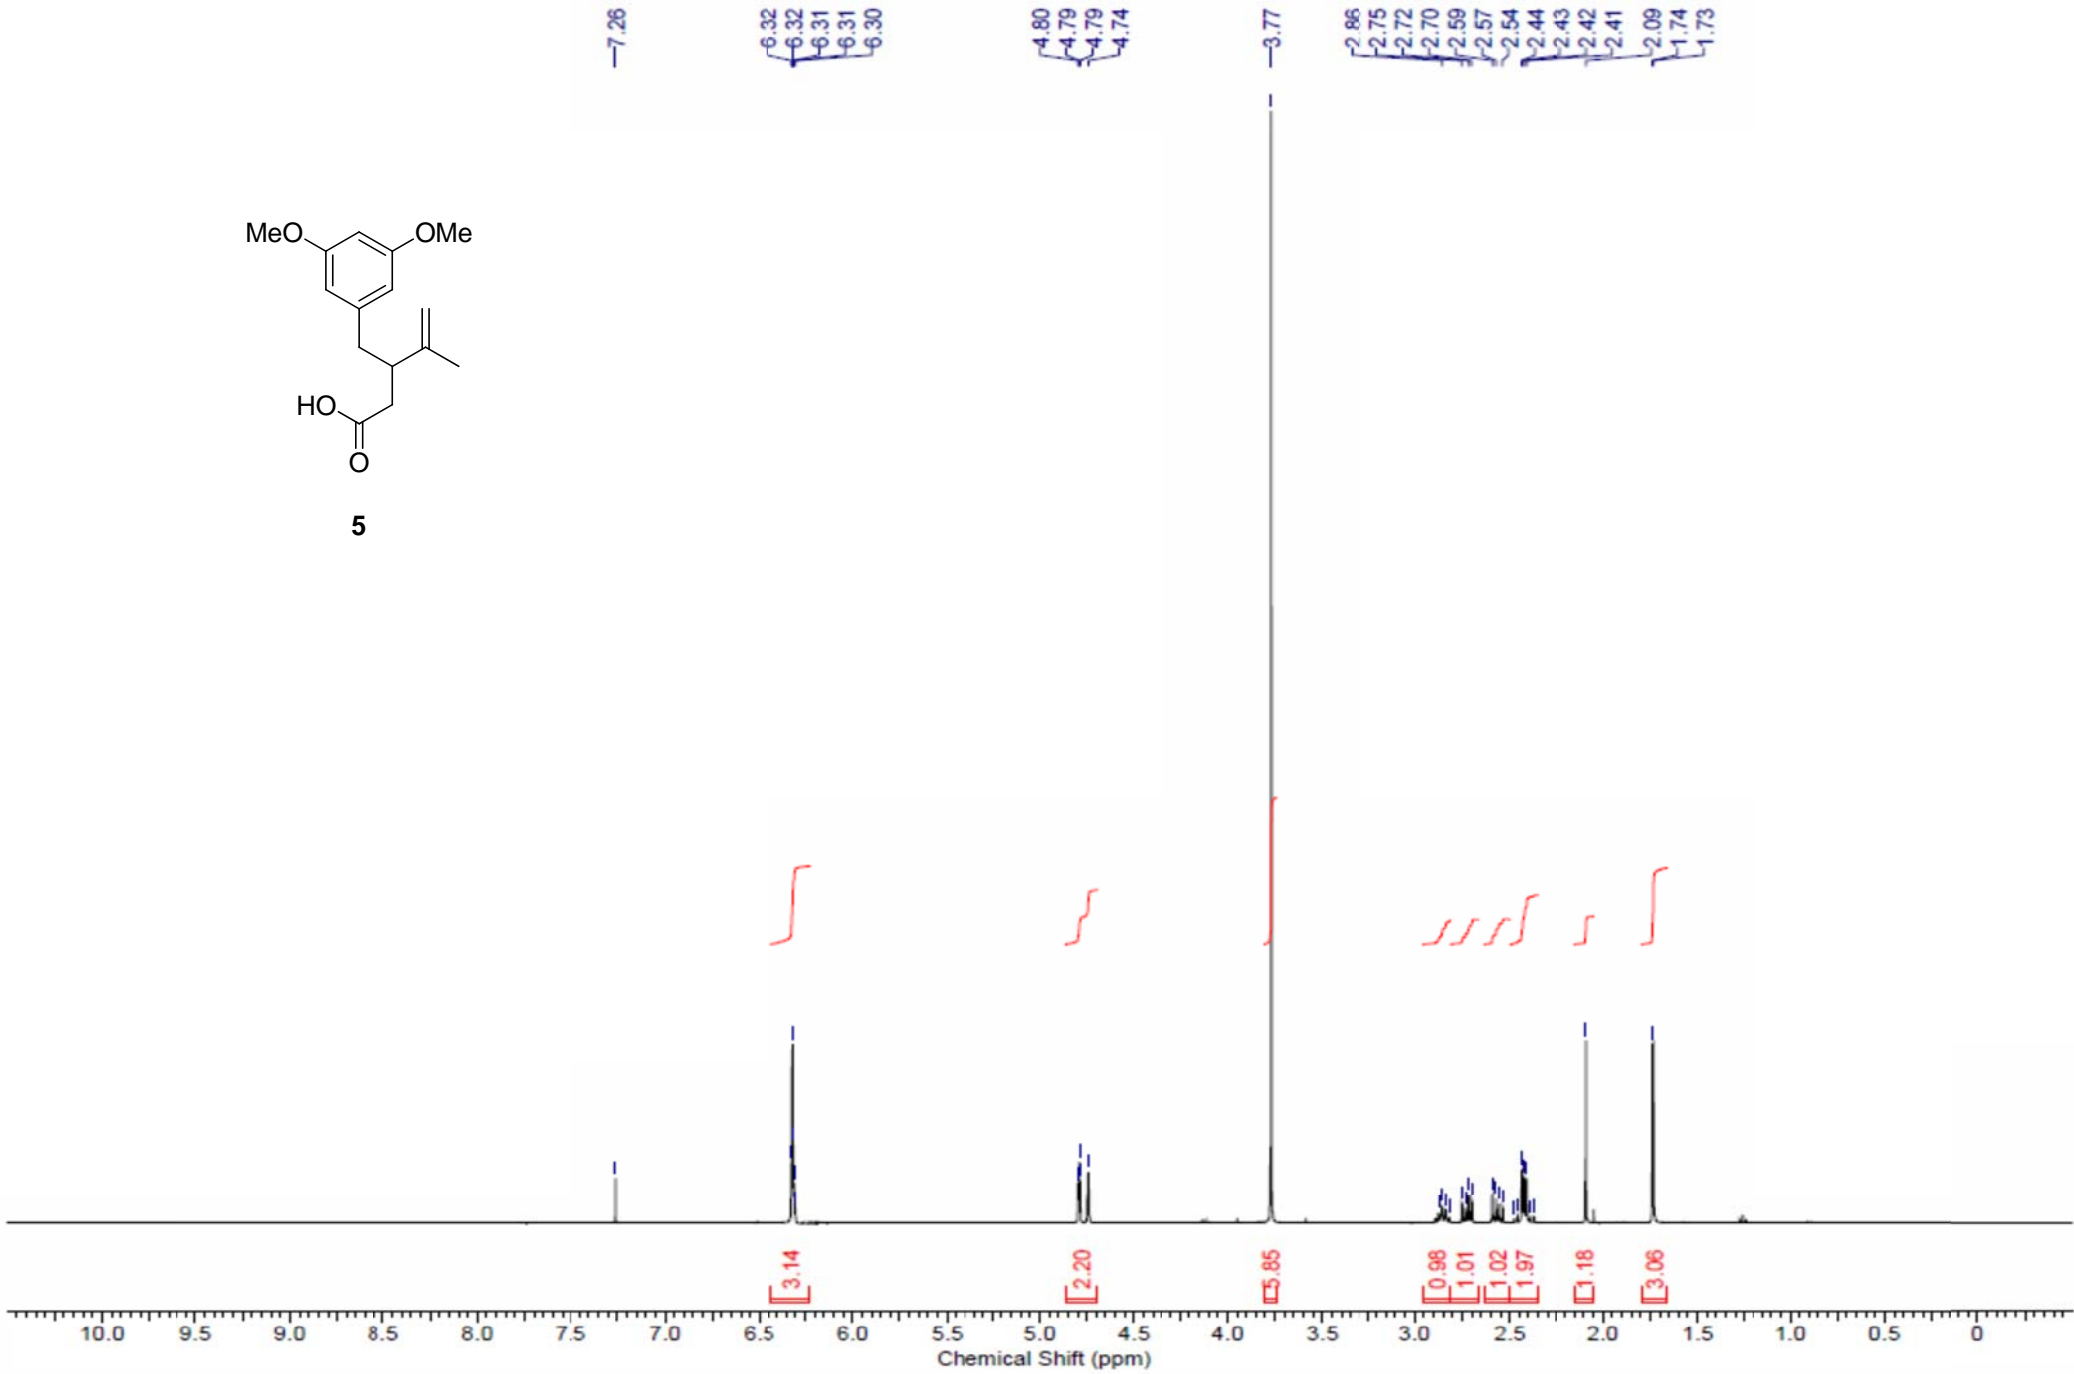

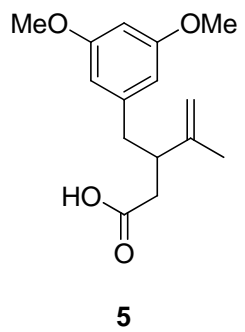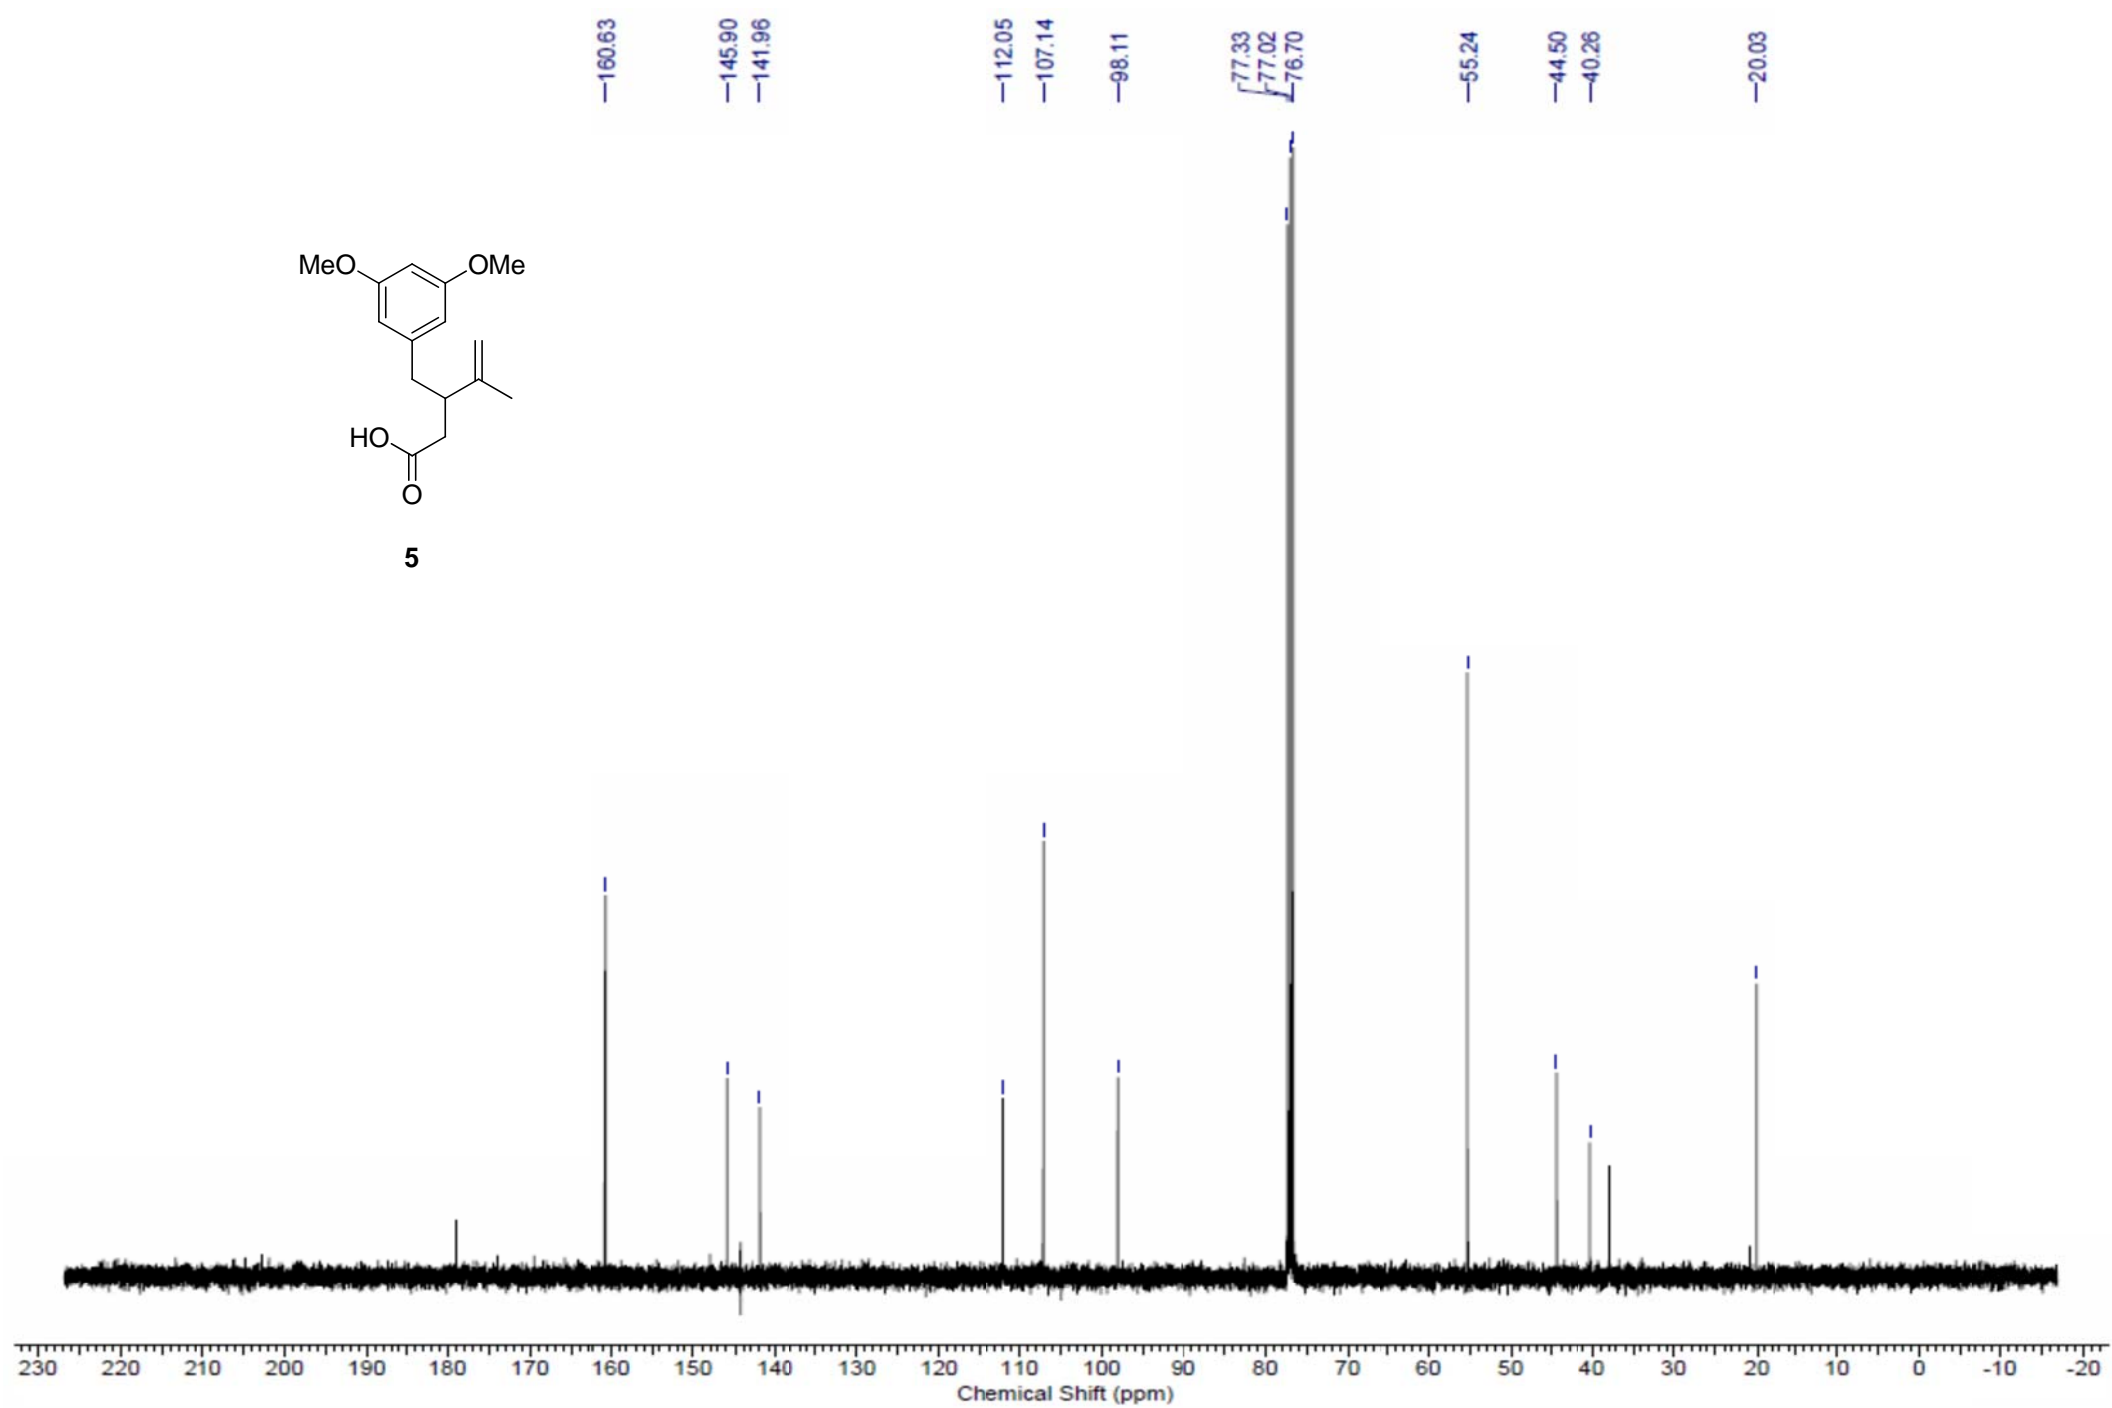

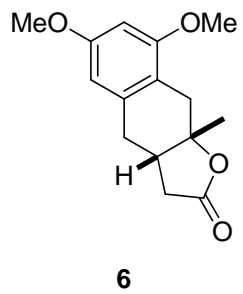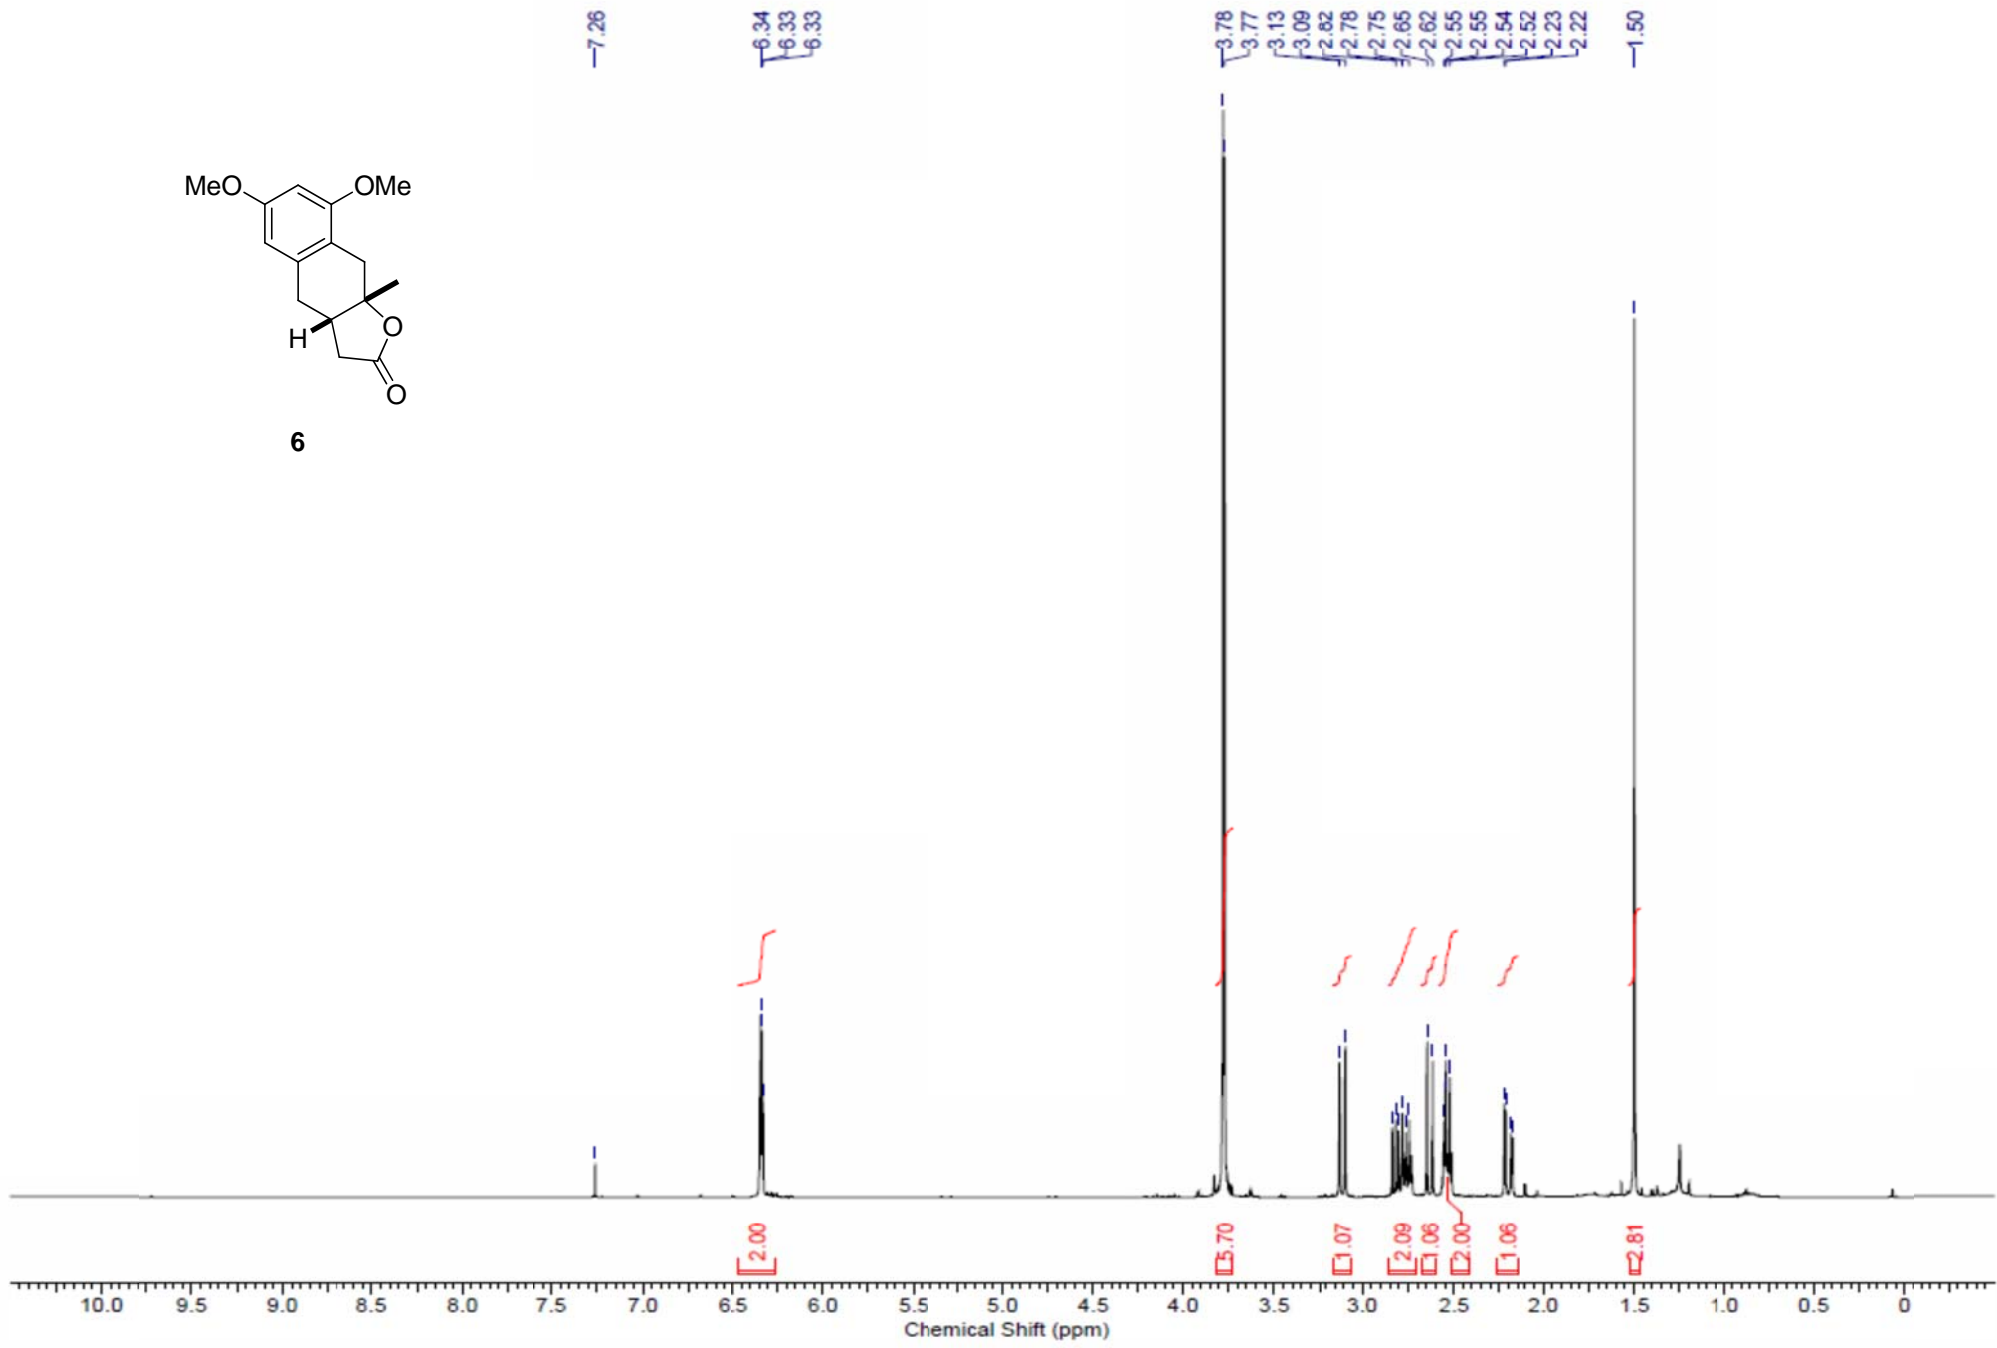

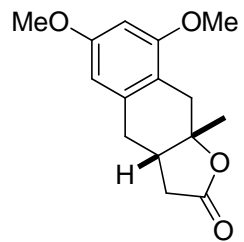

6

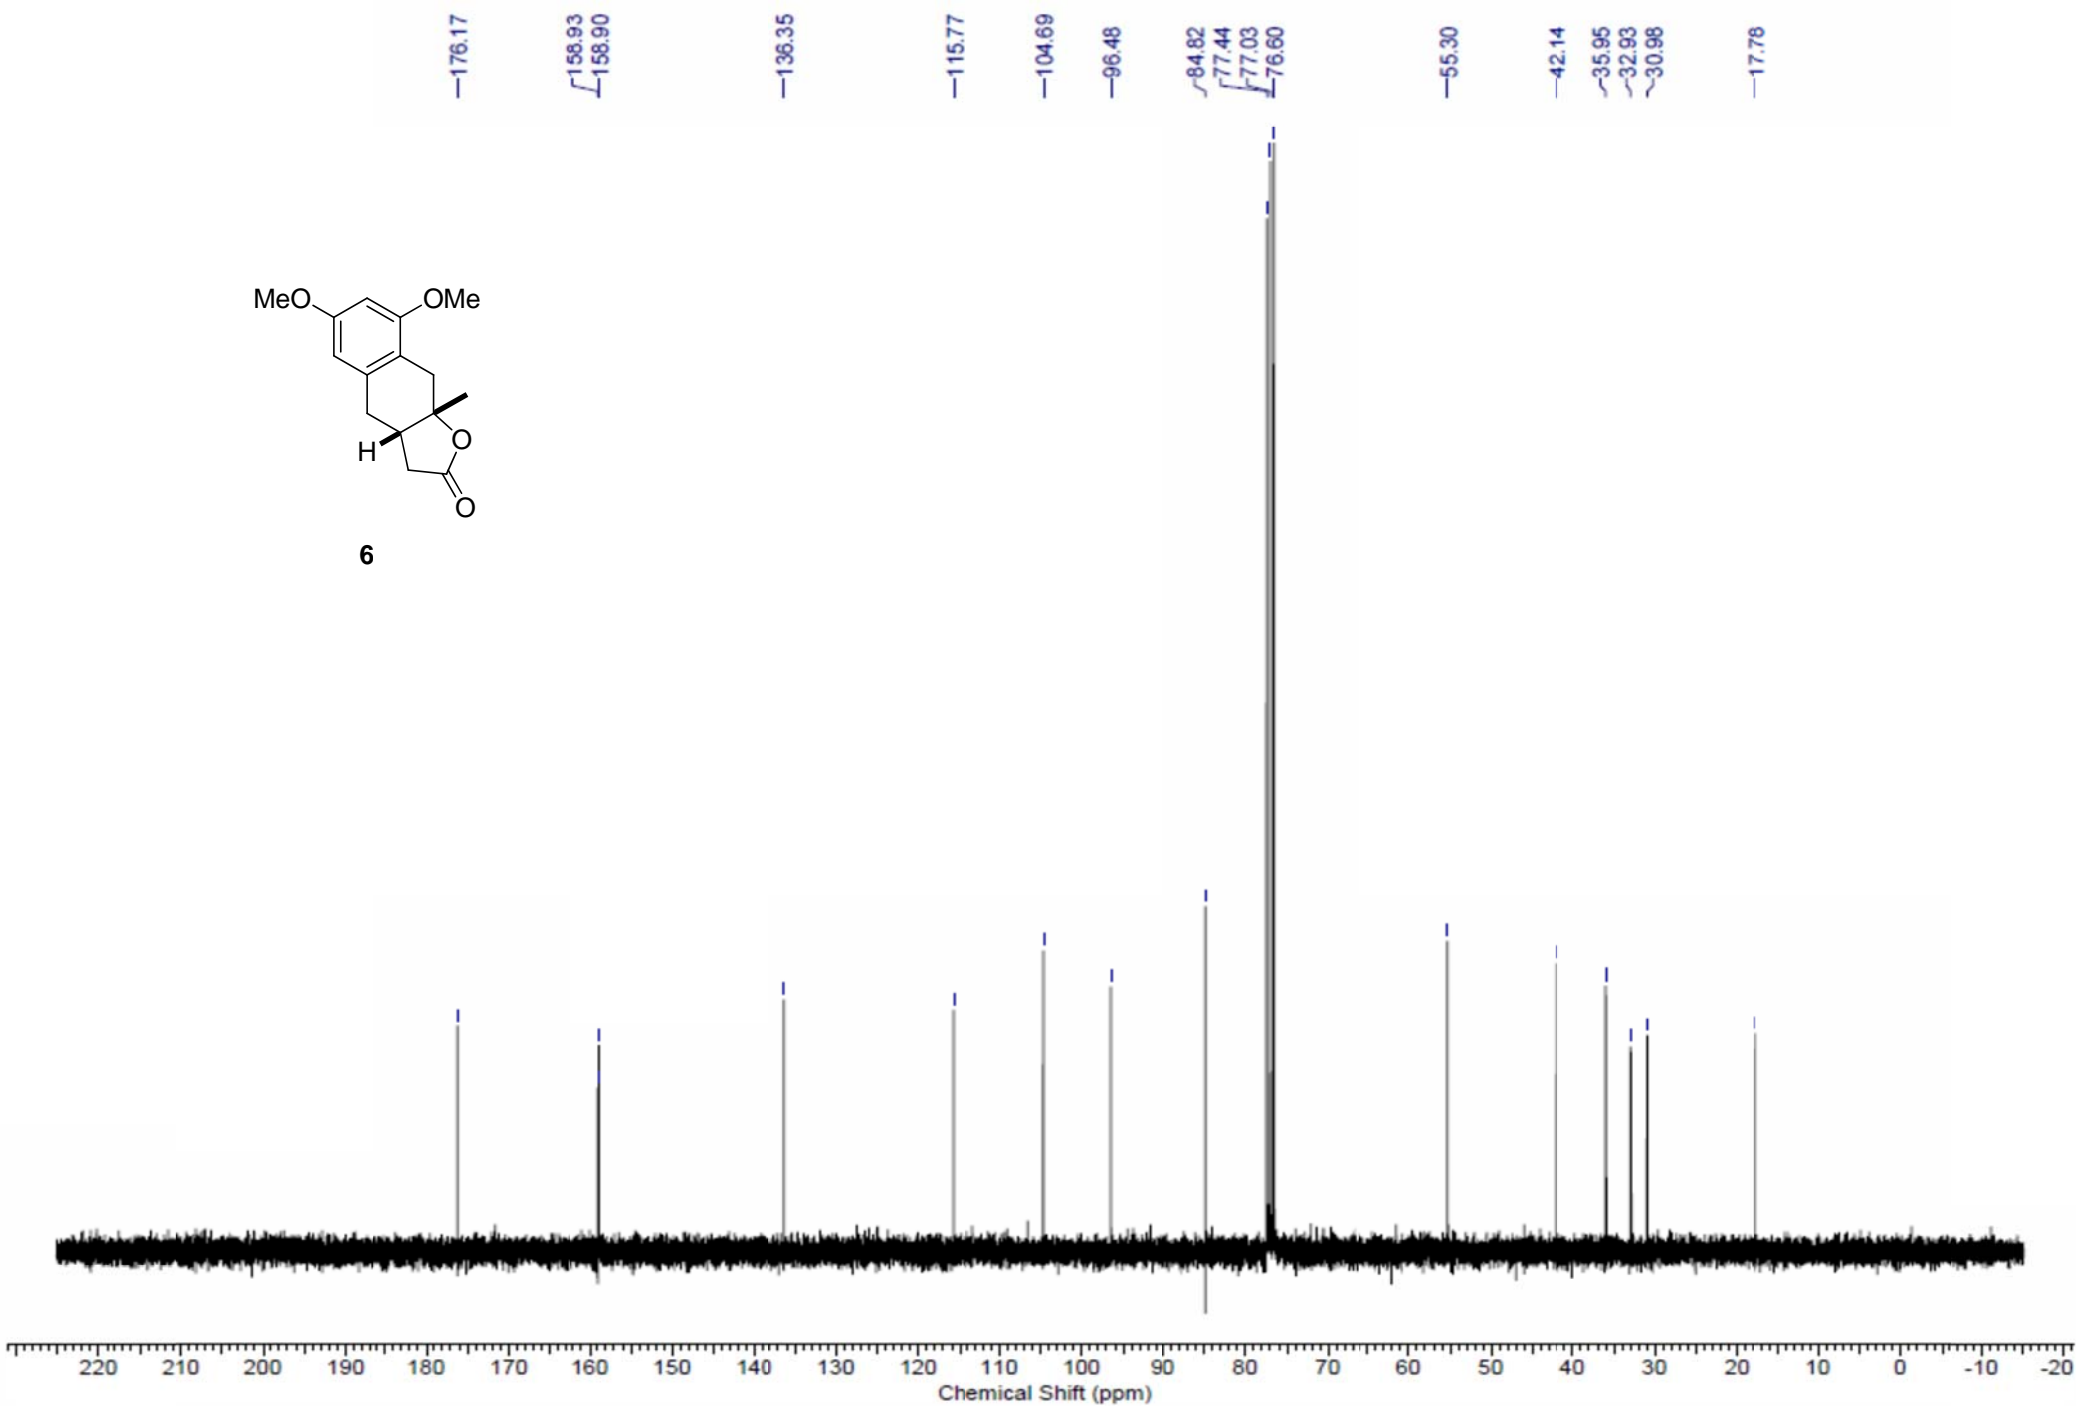

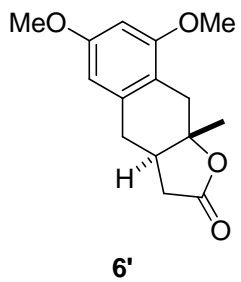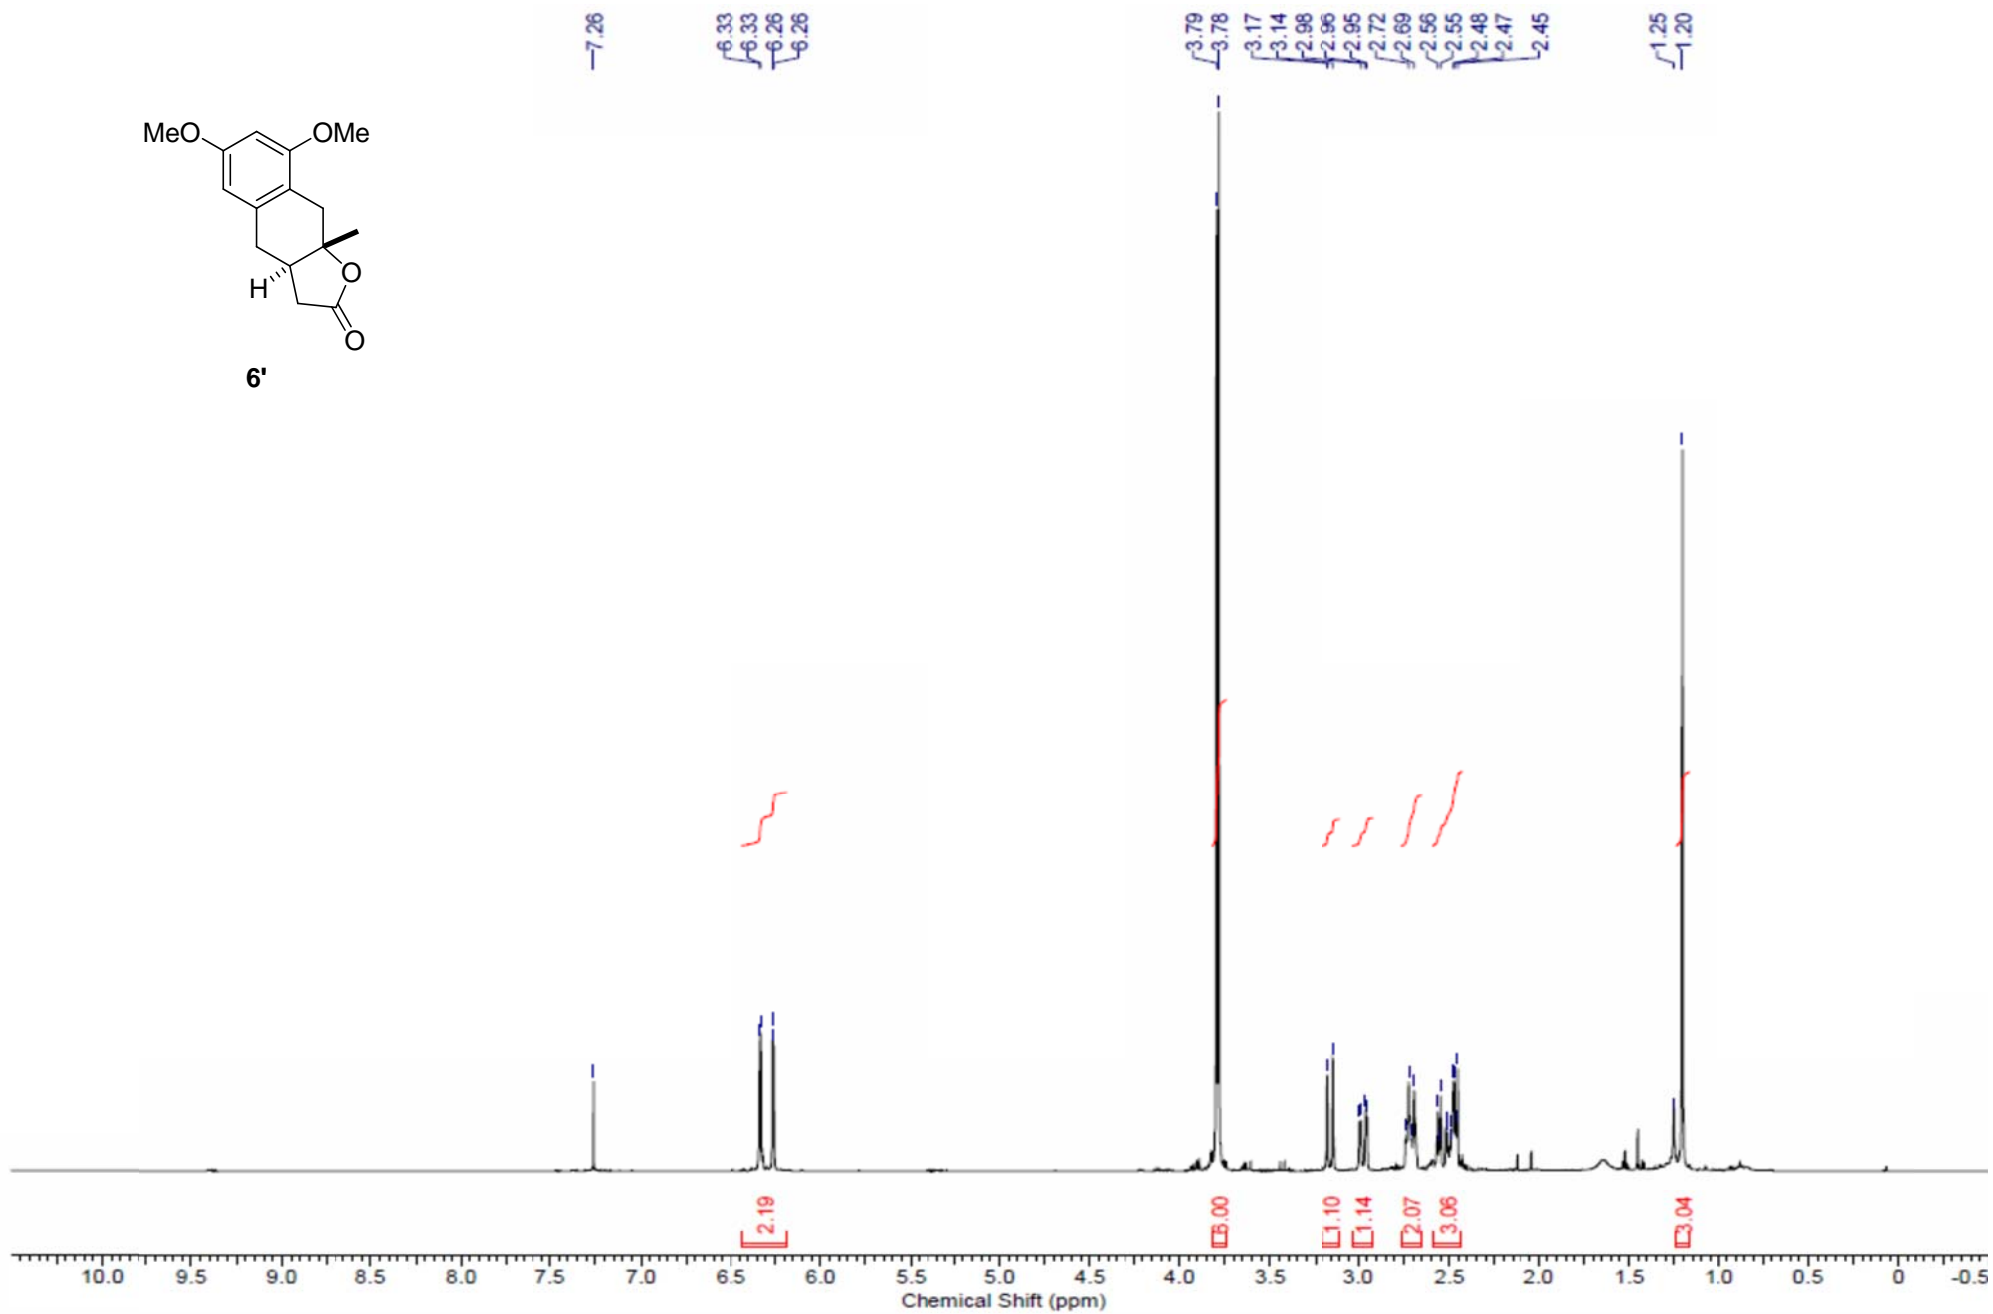

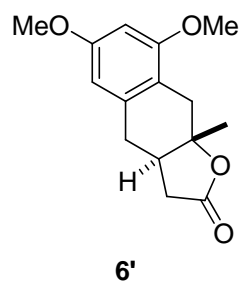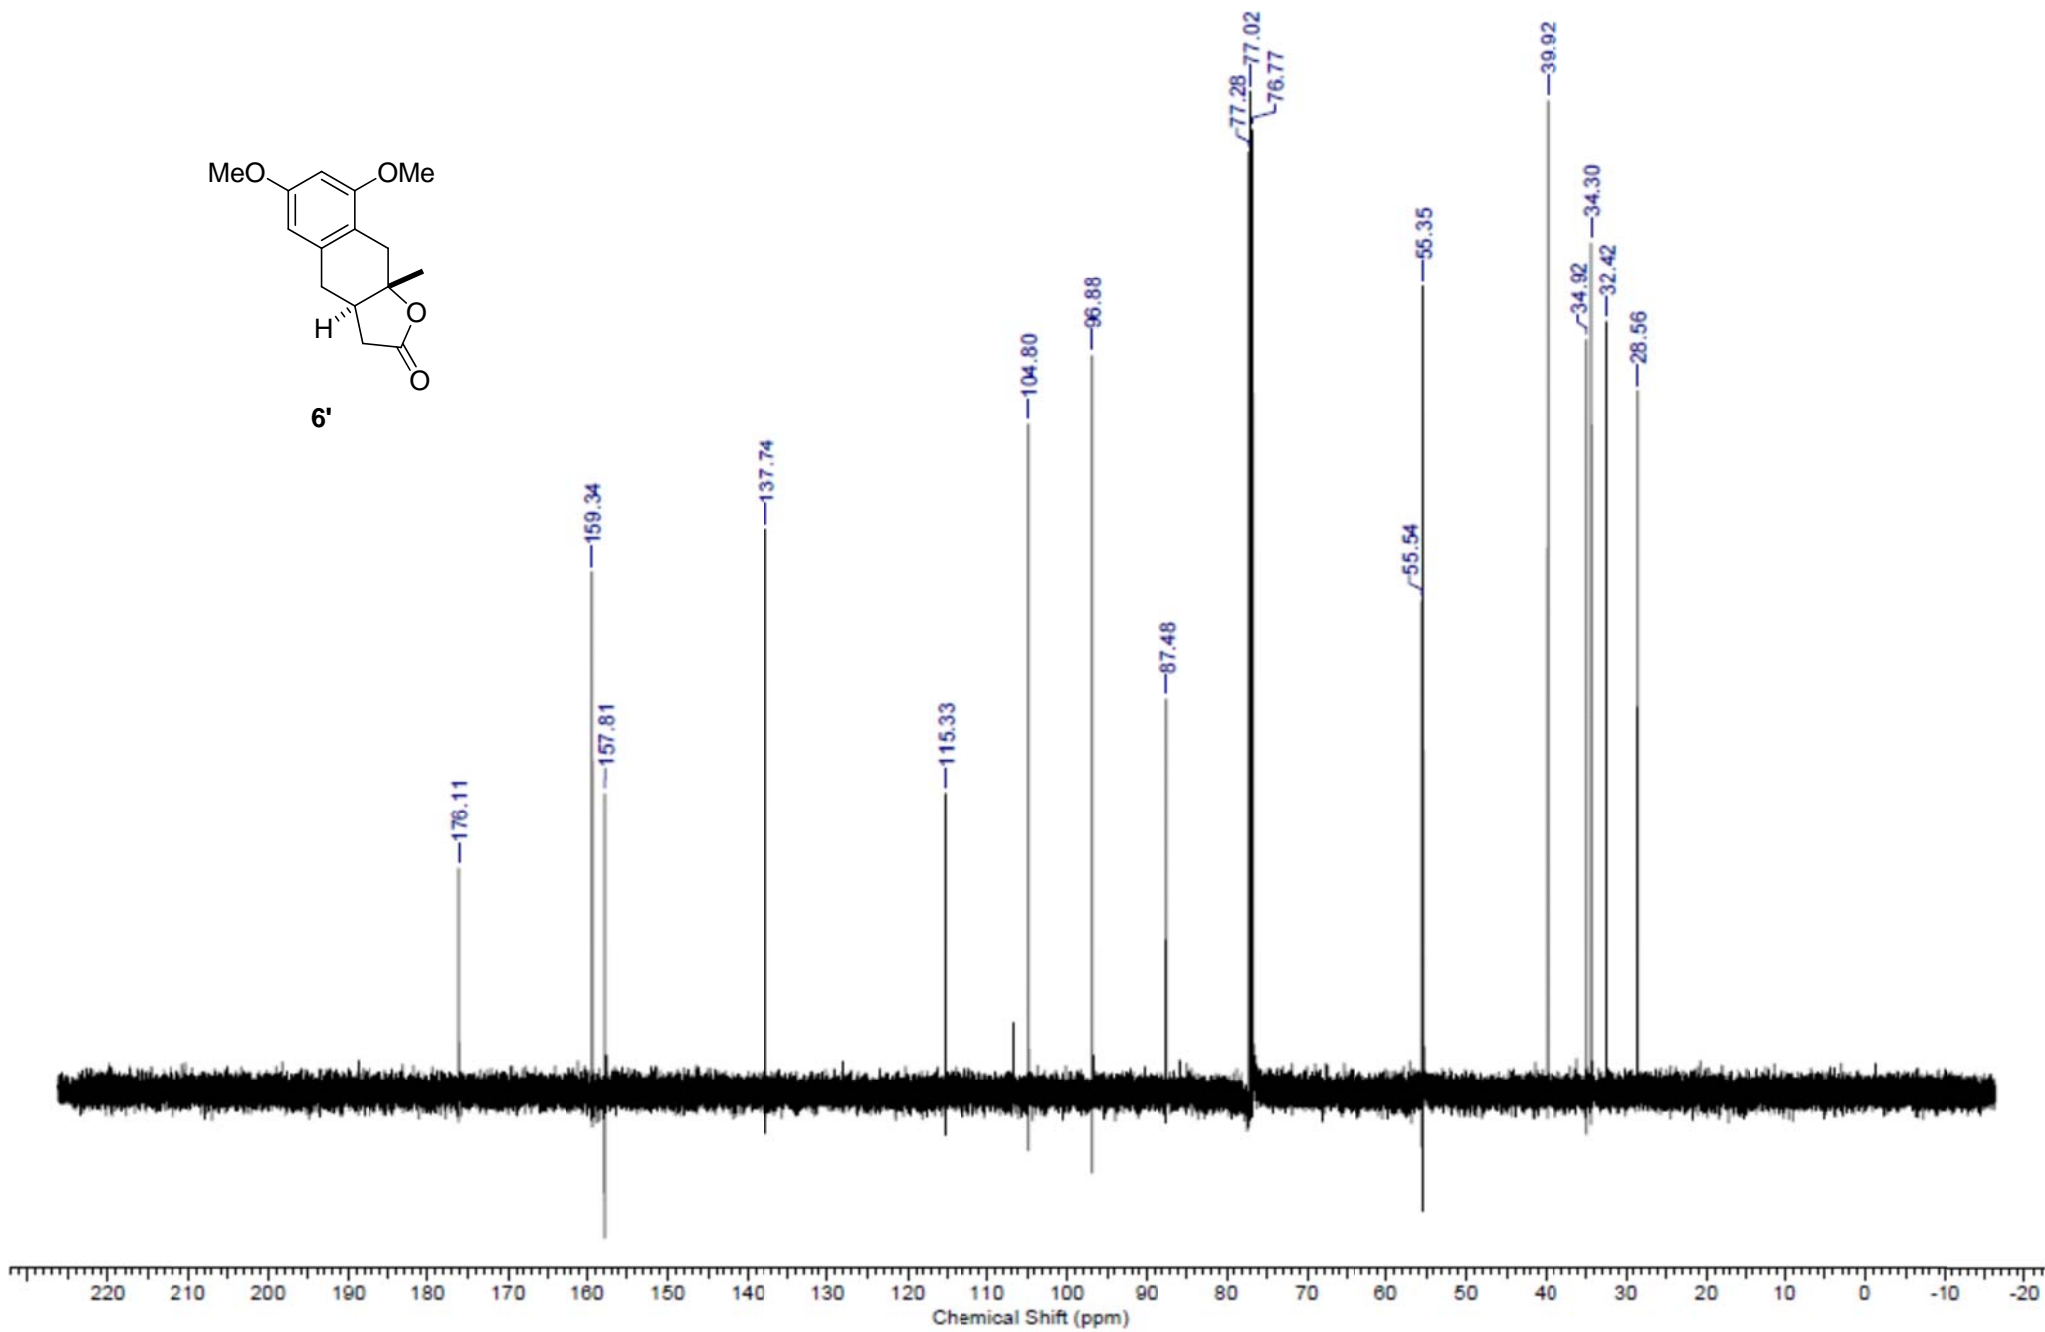



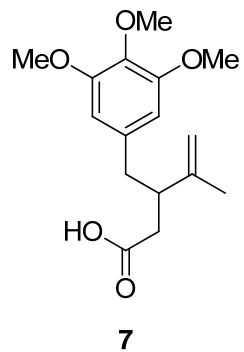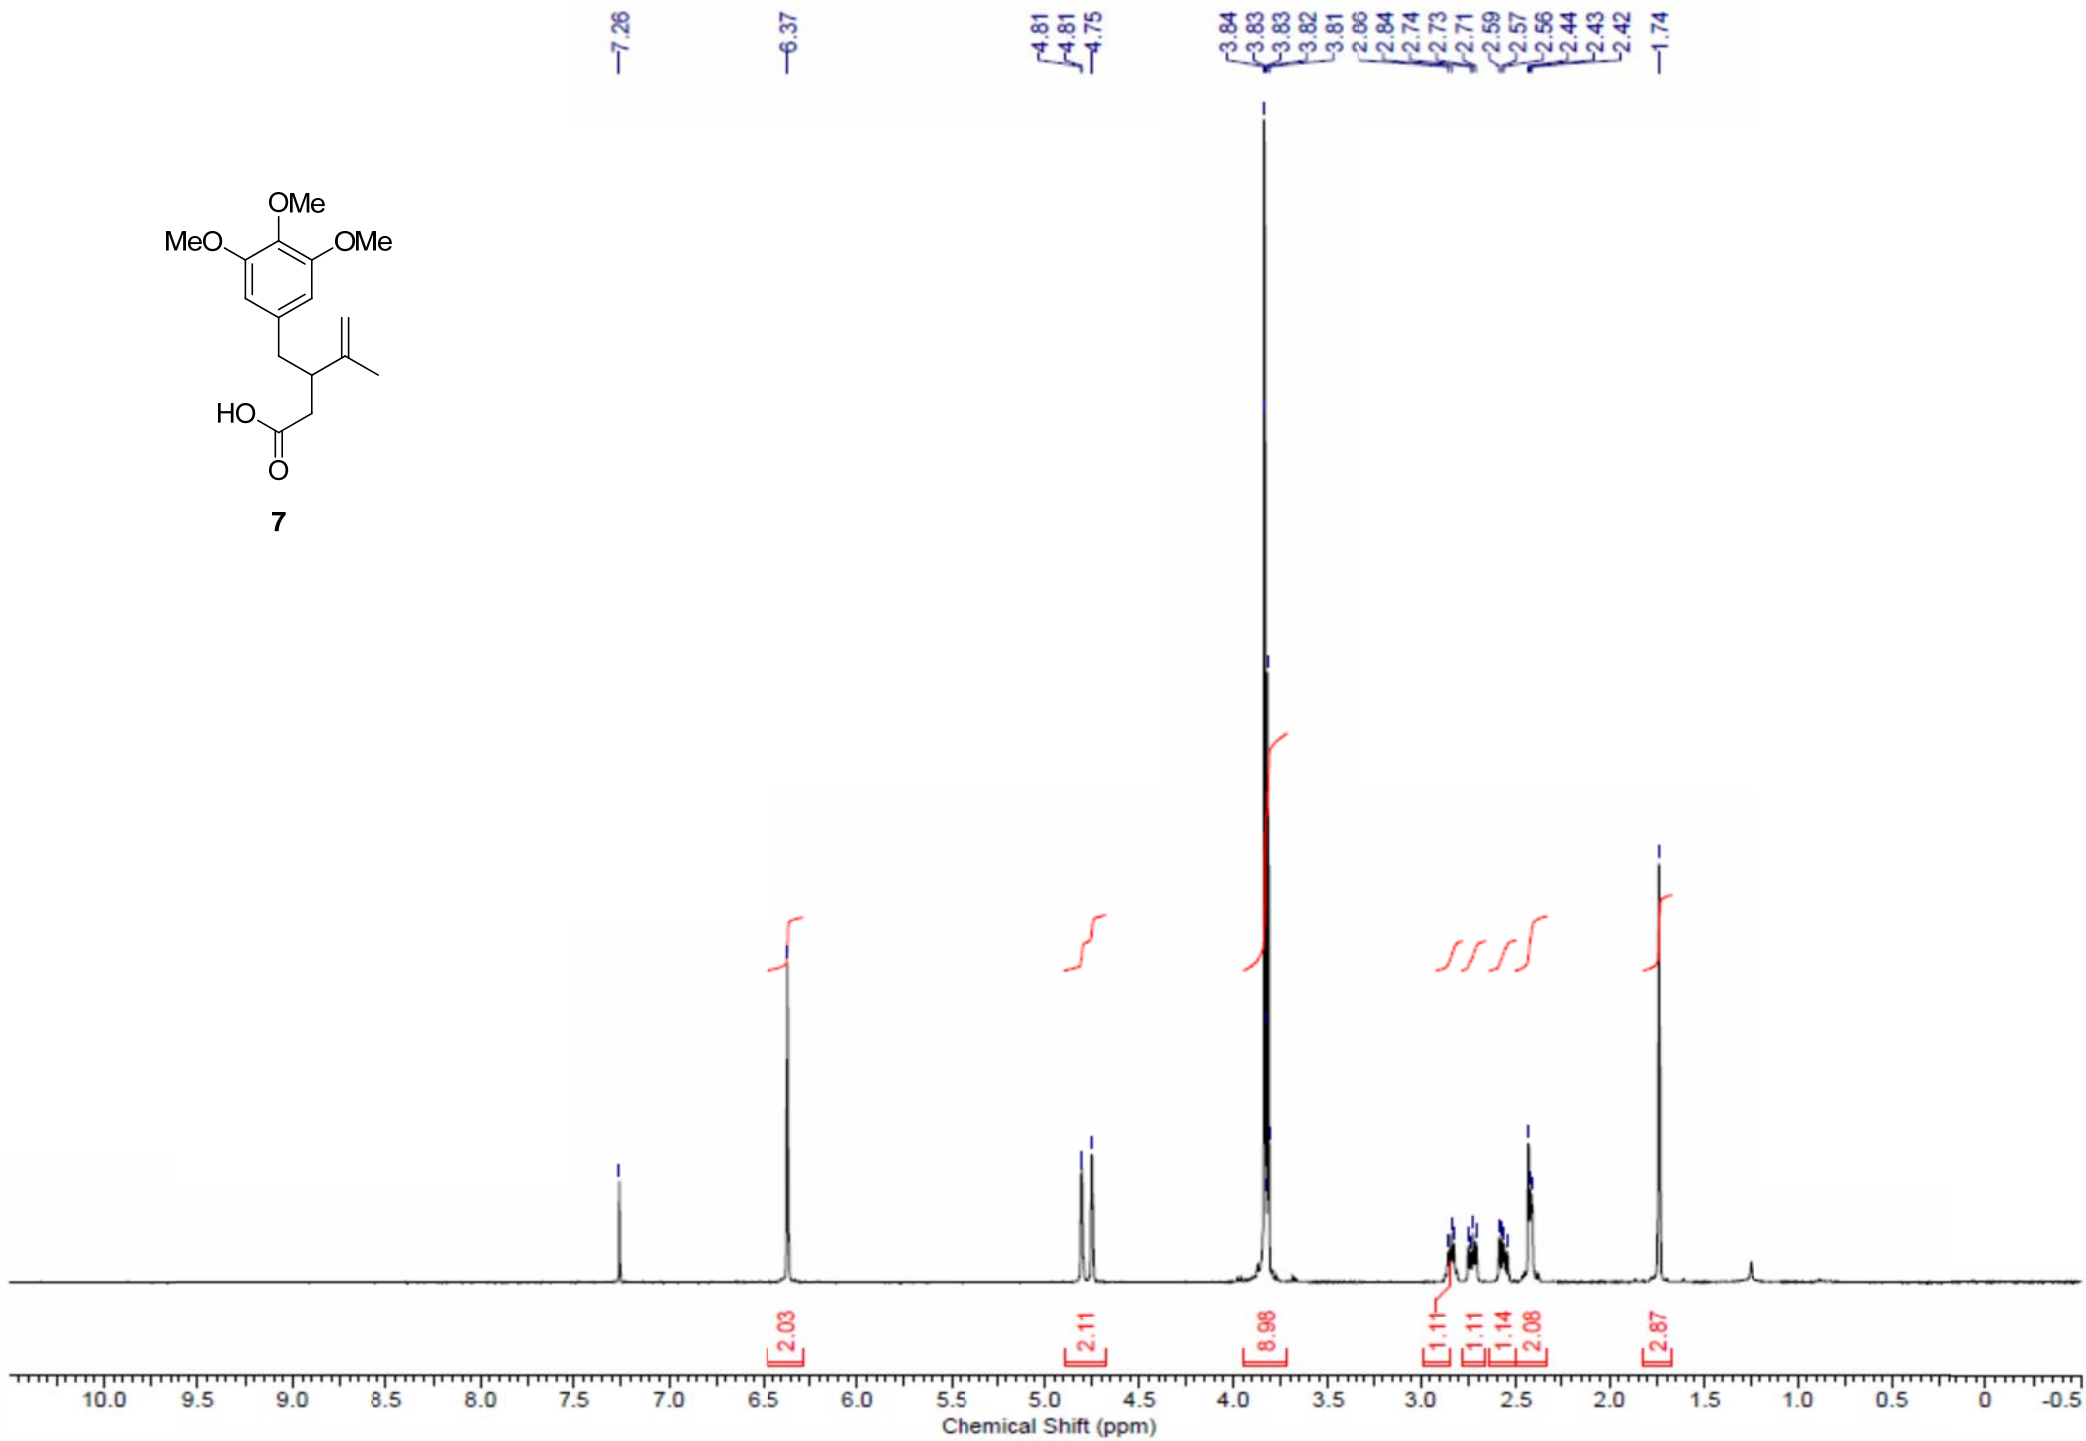

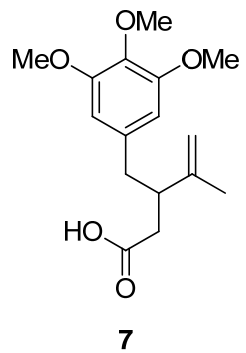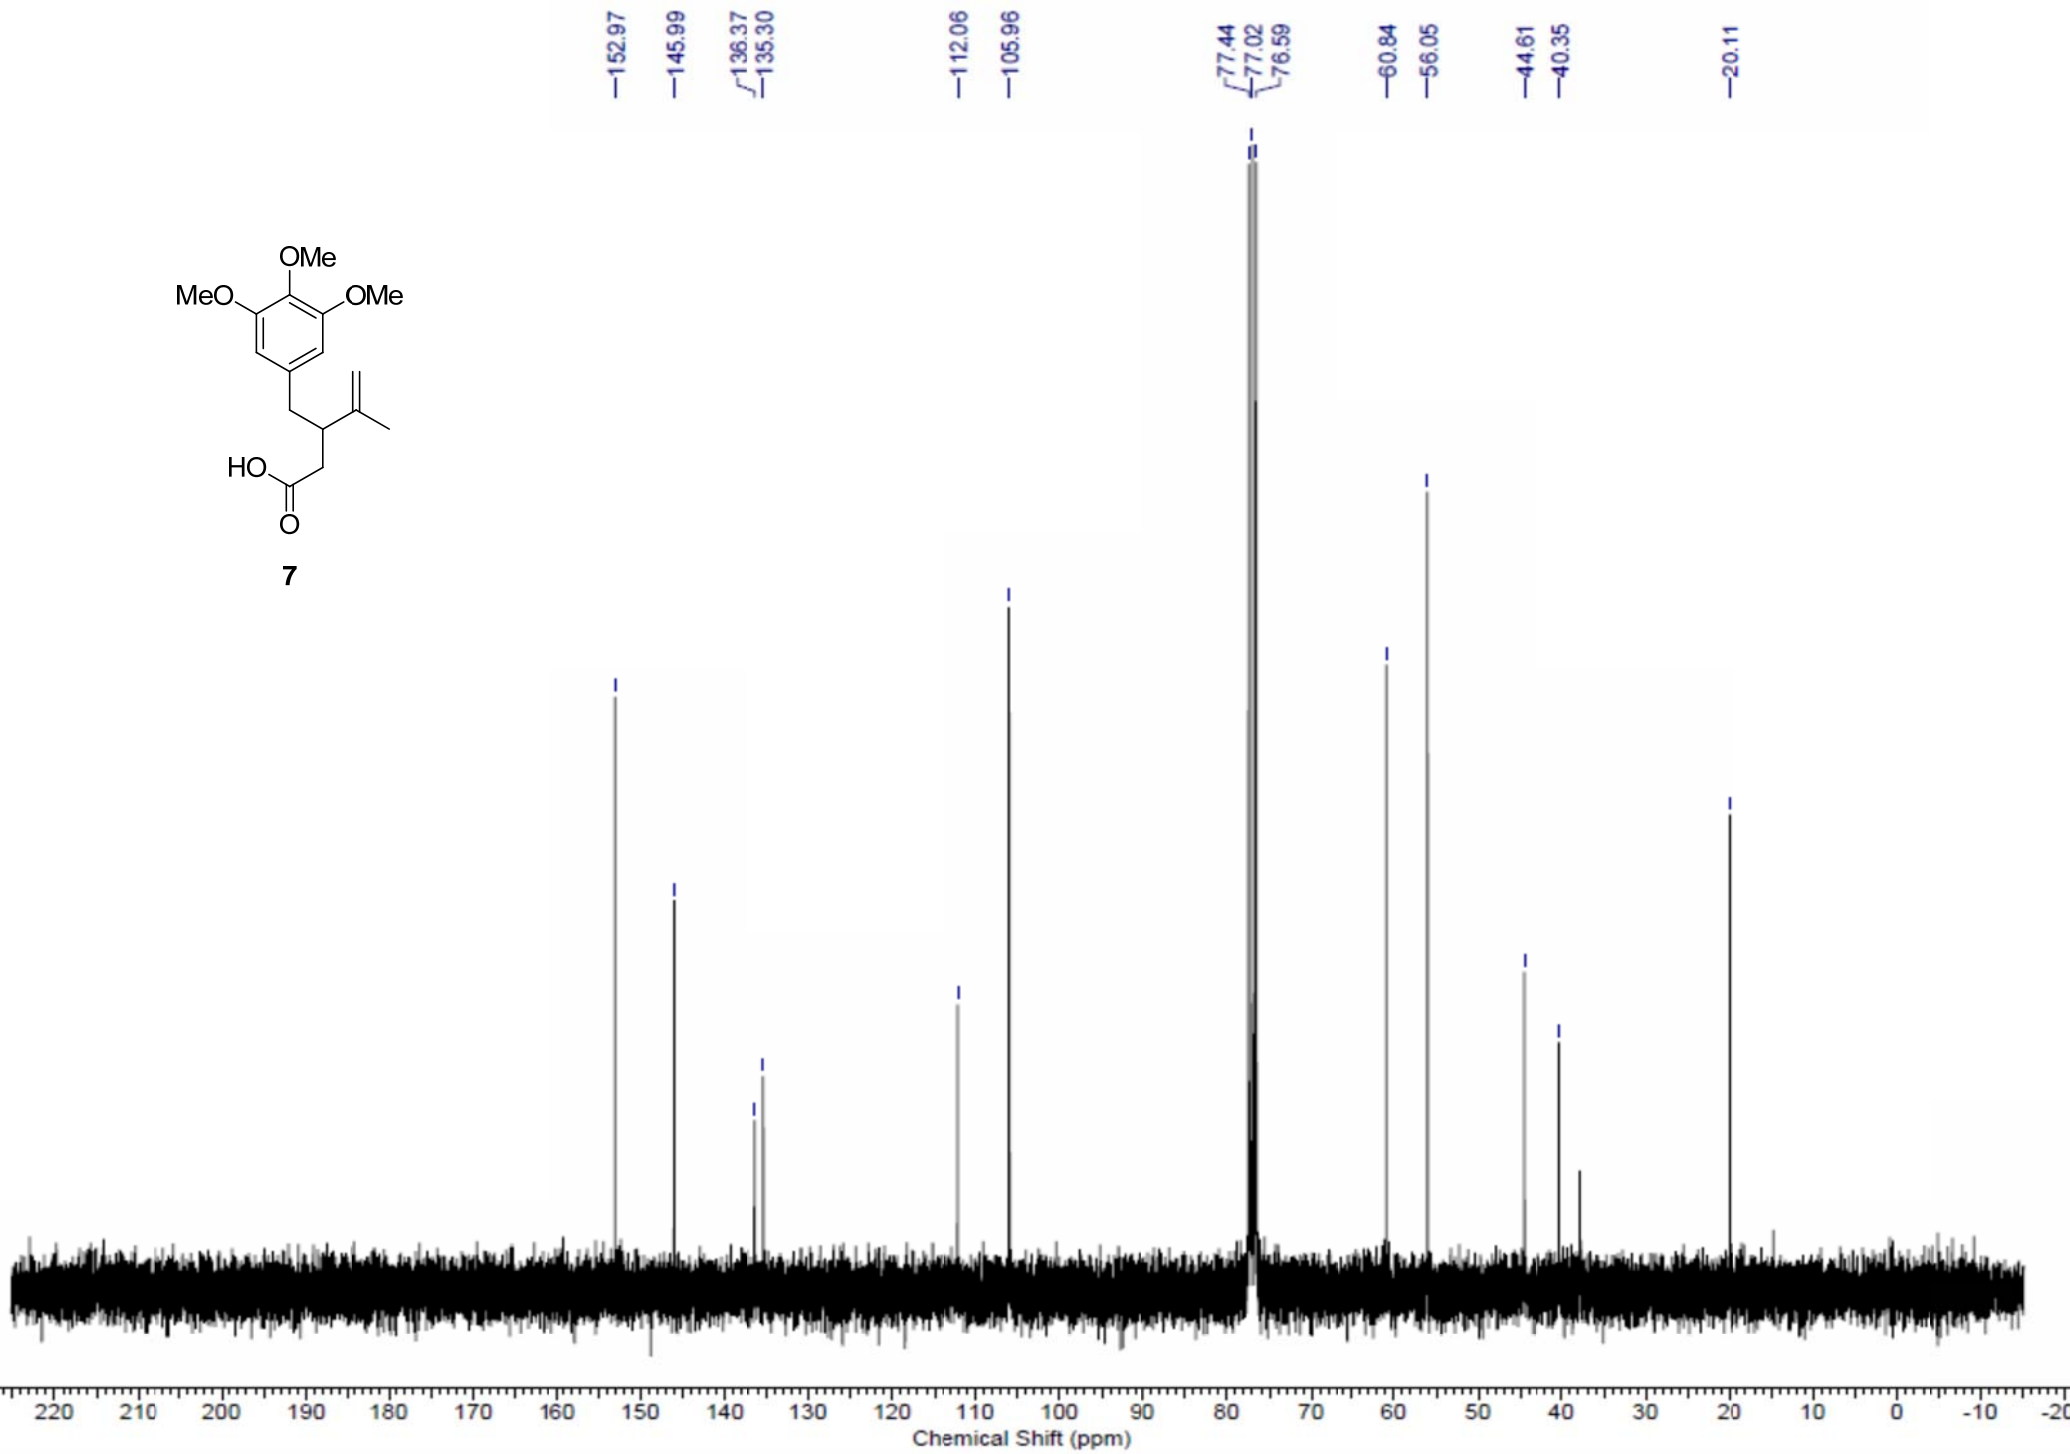

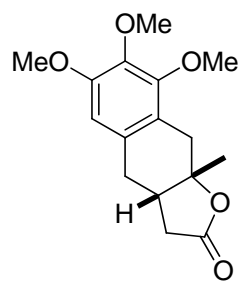

**8**

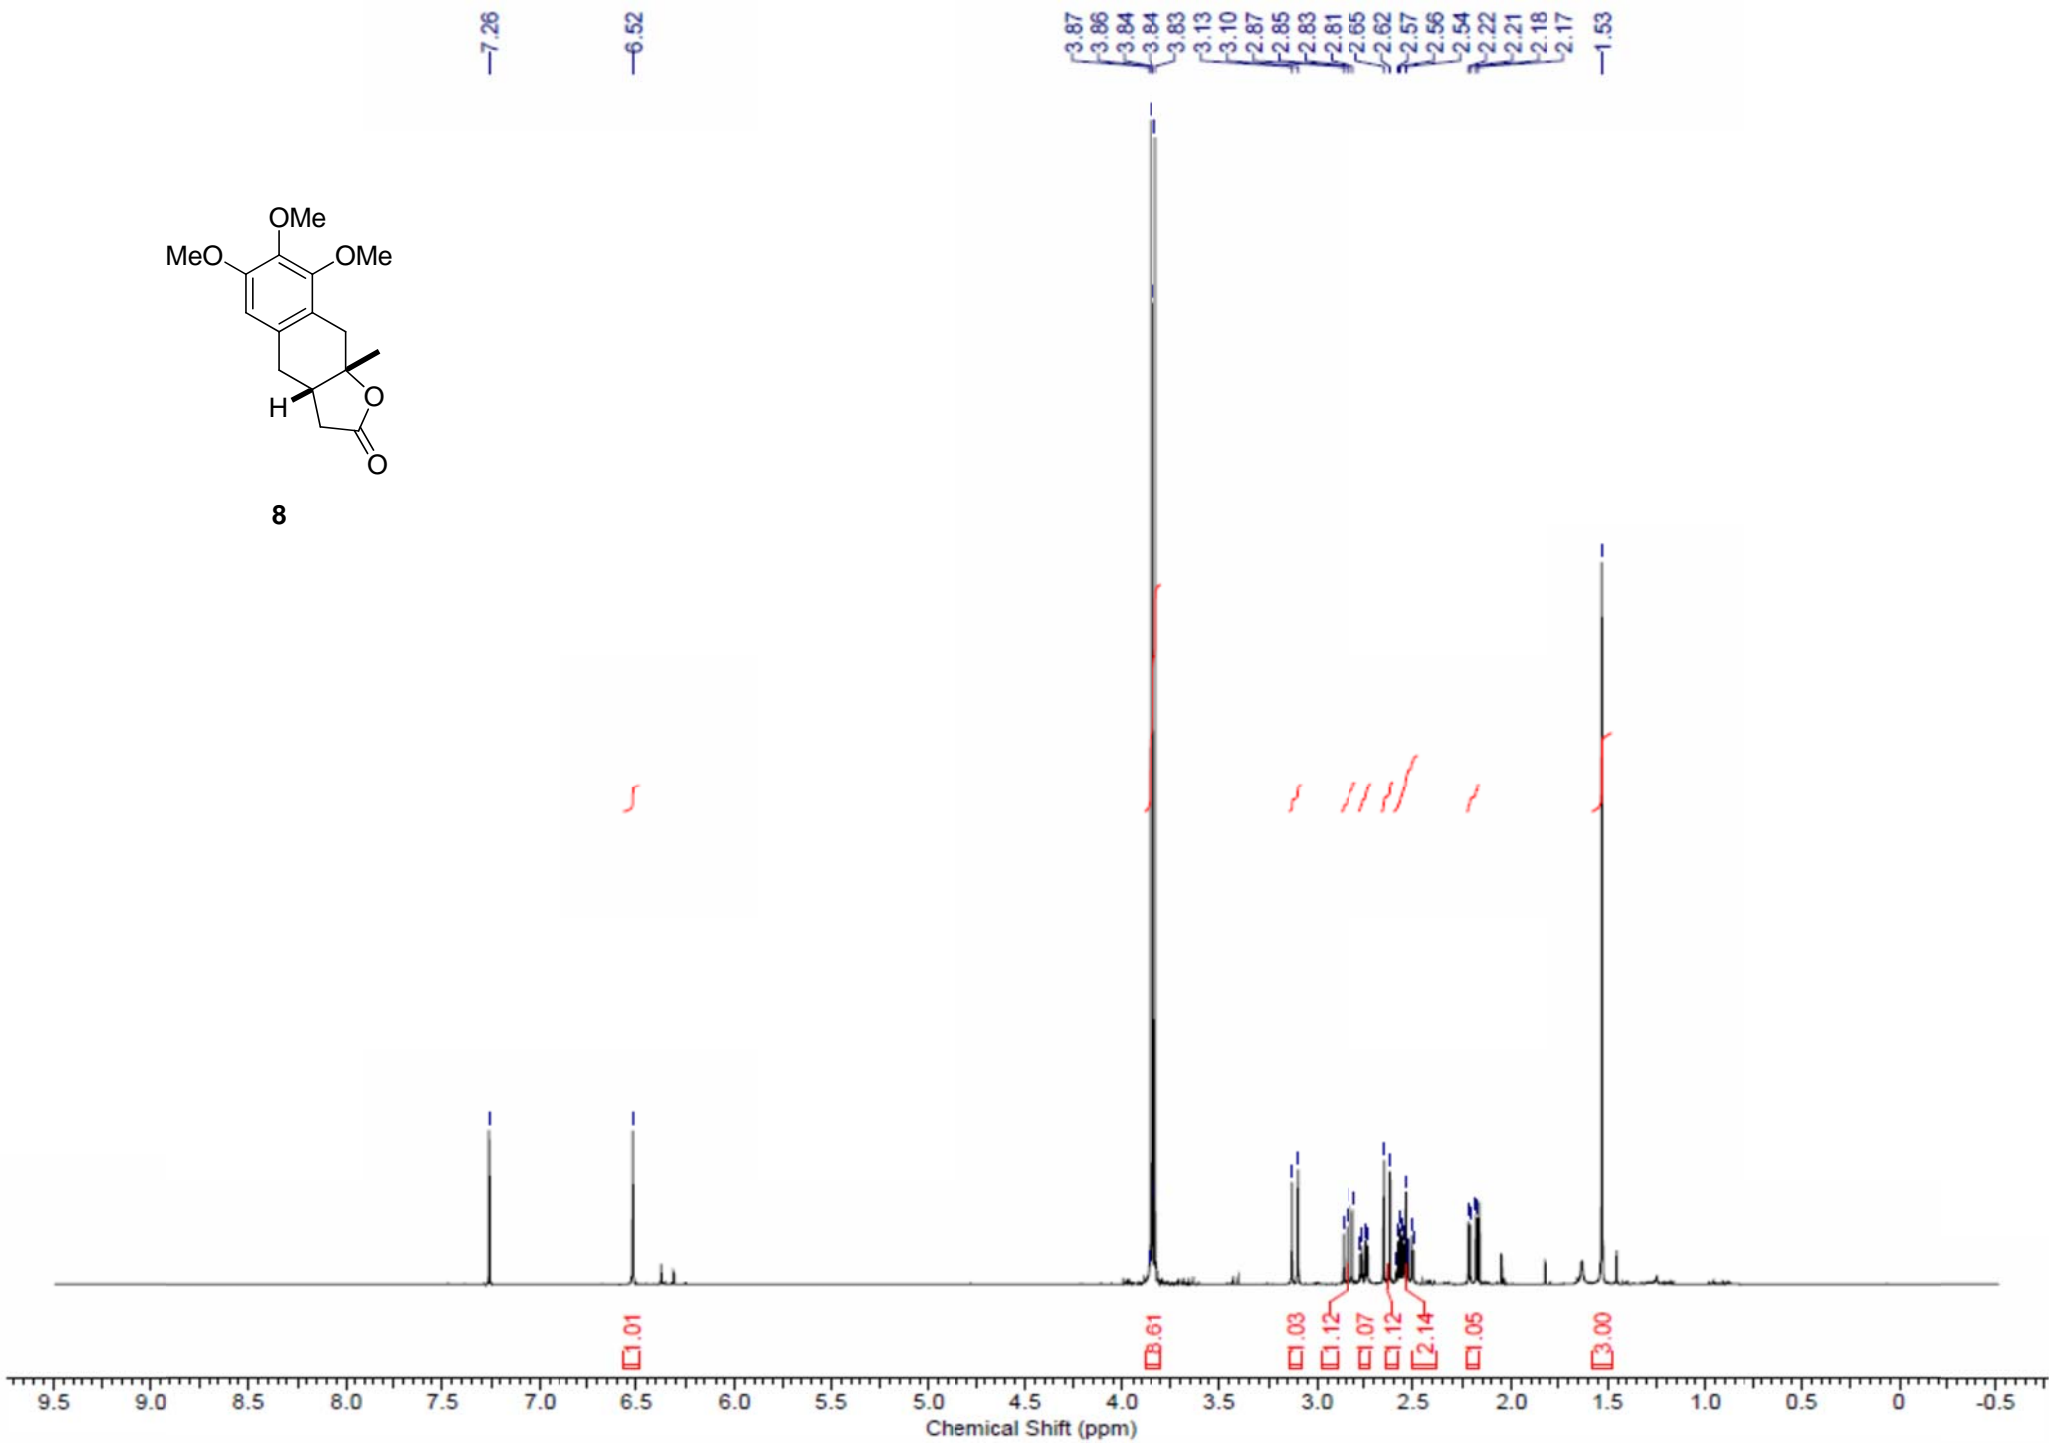

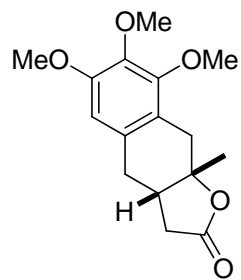

8

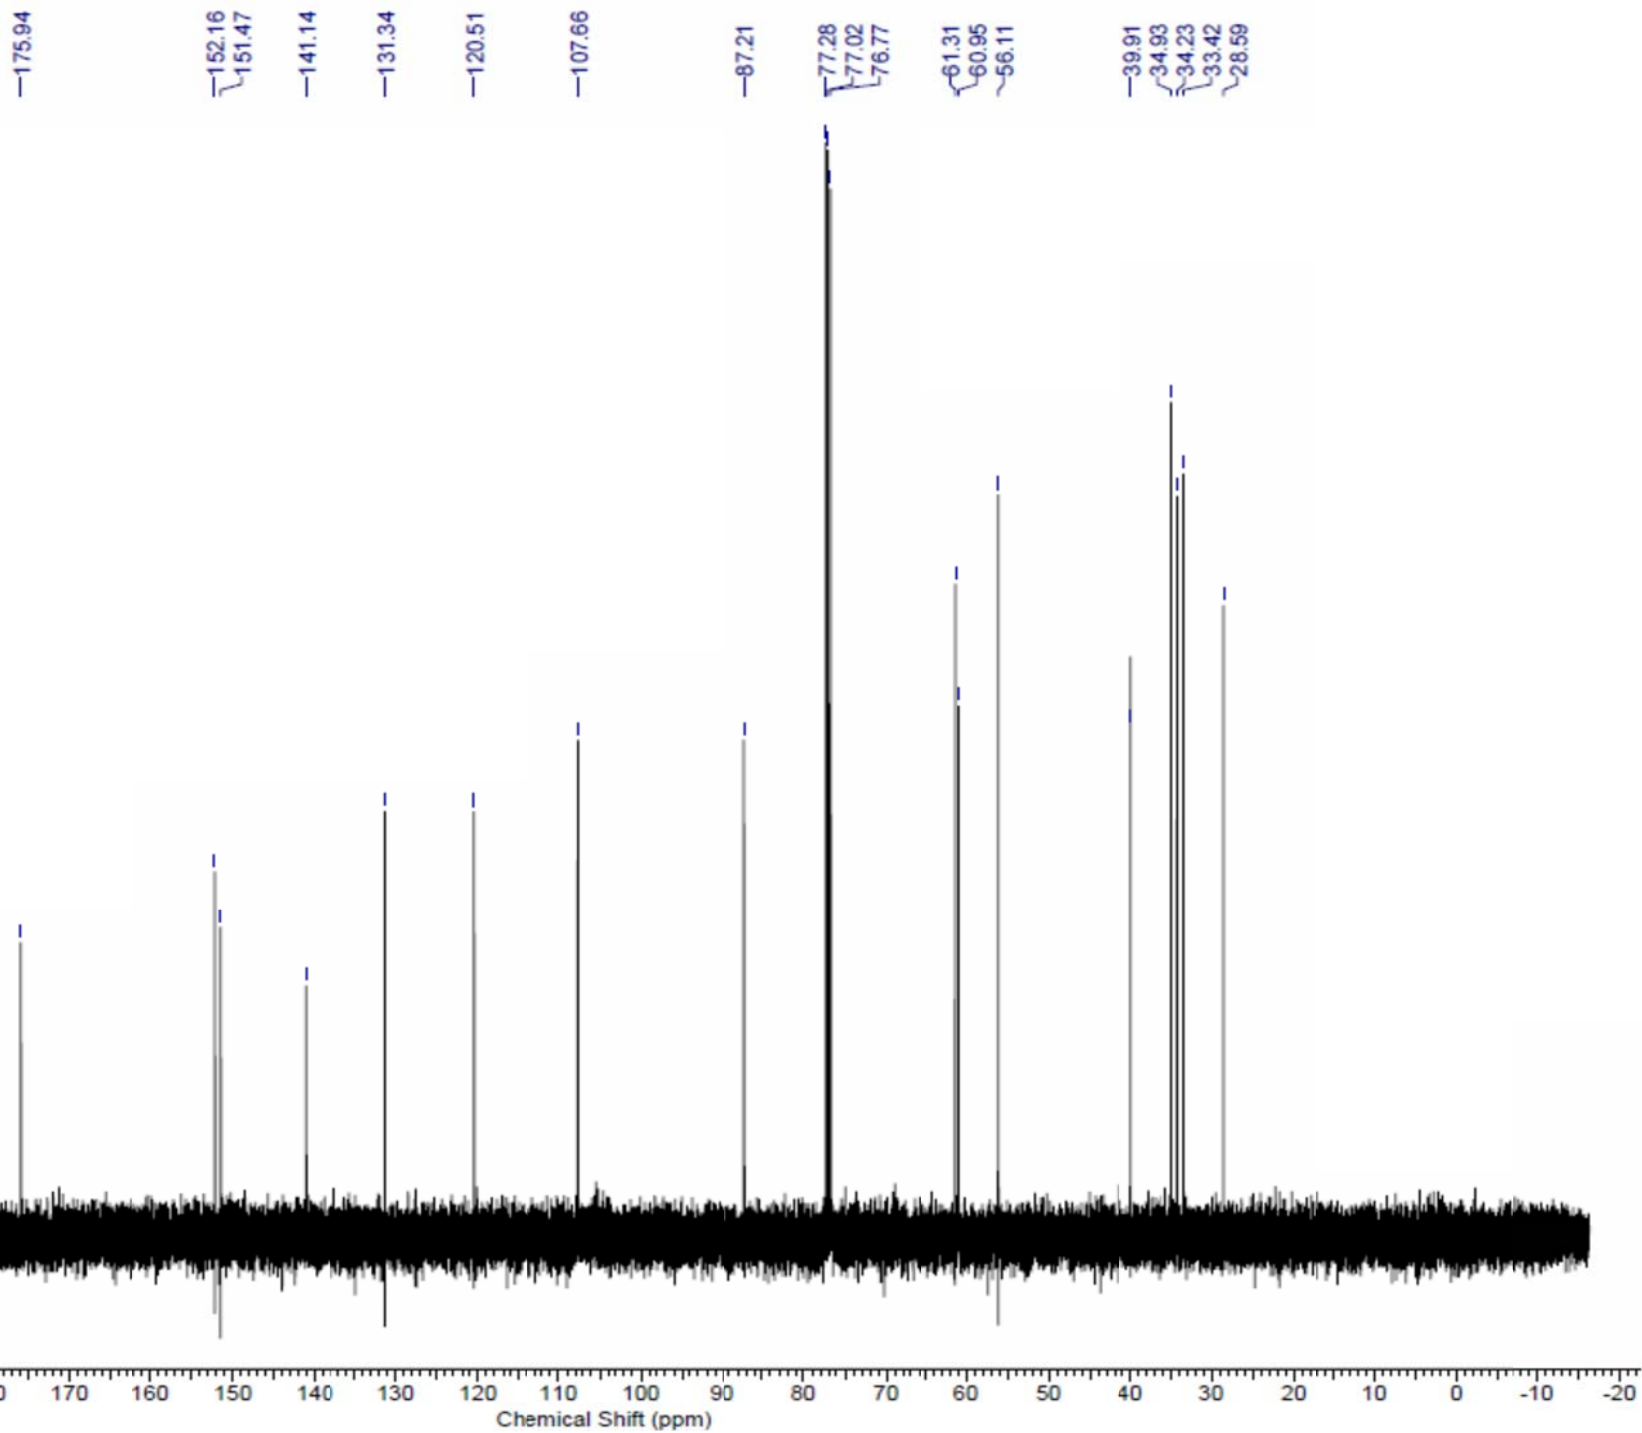

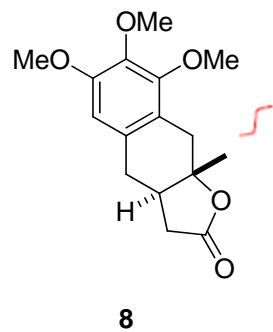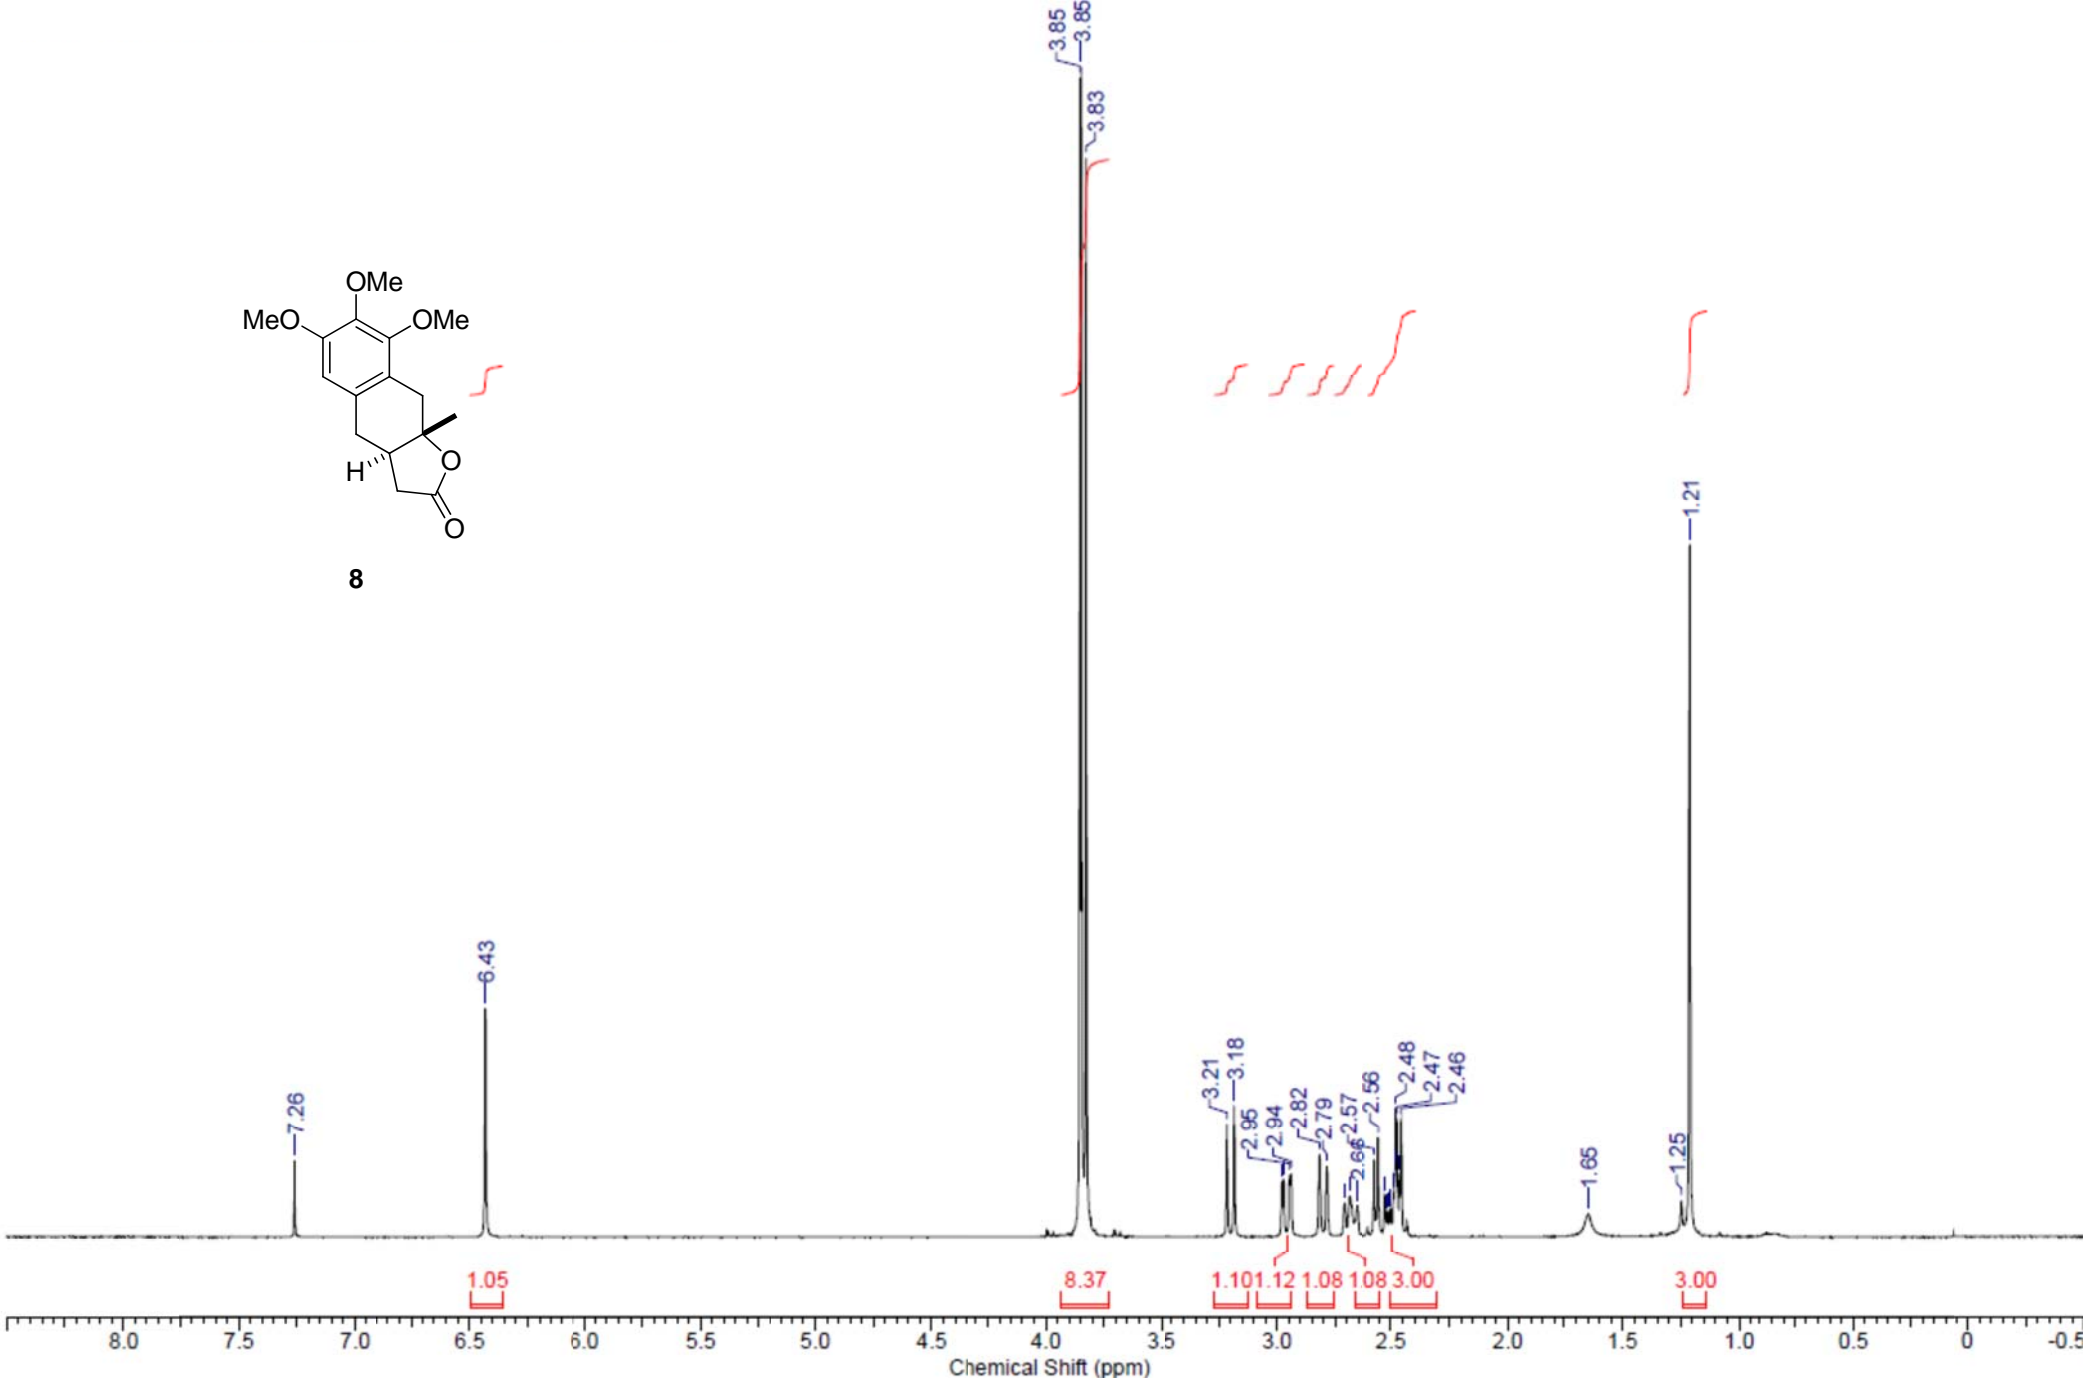

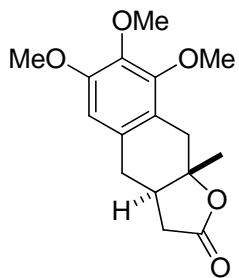

**8**

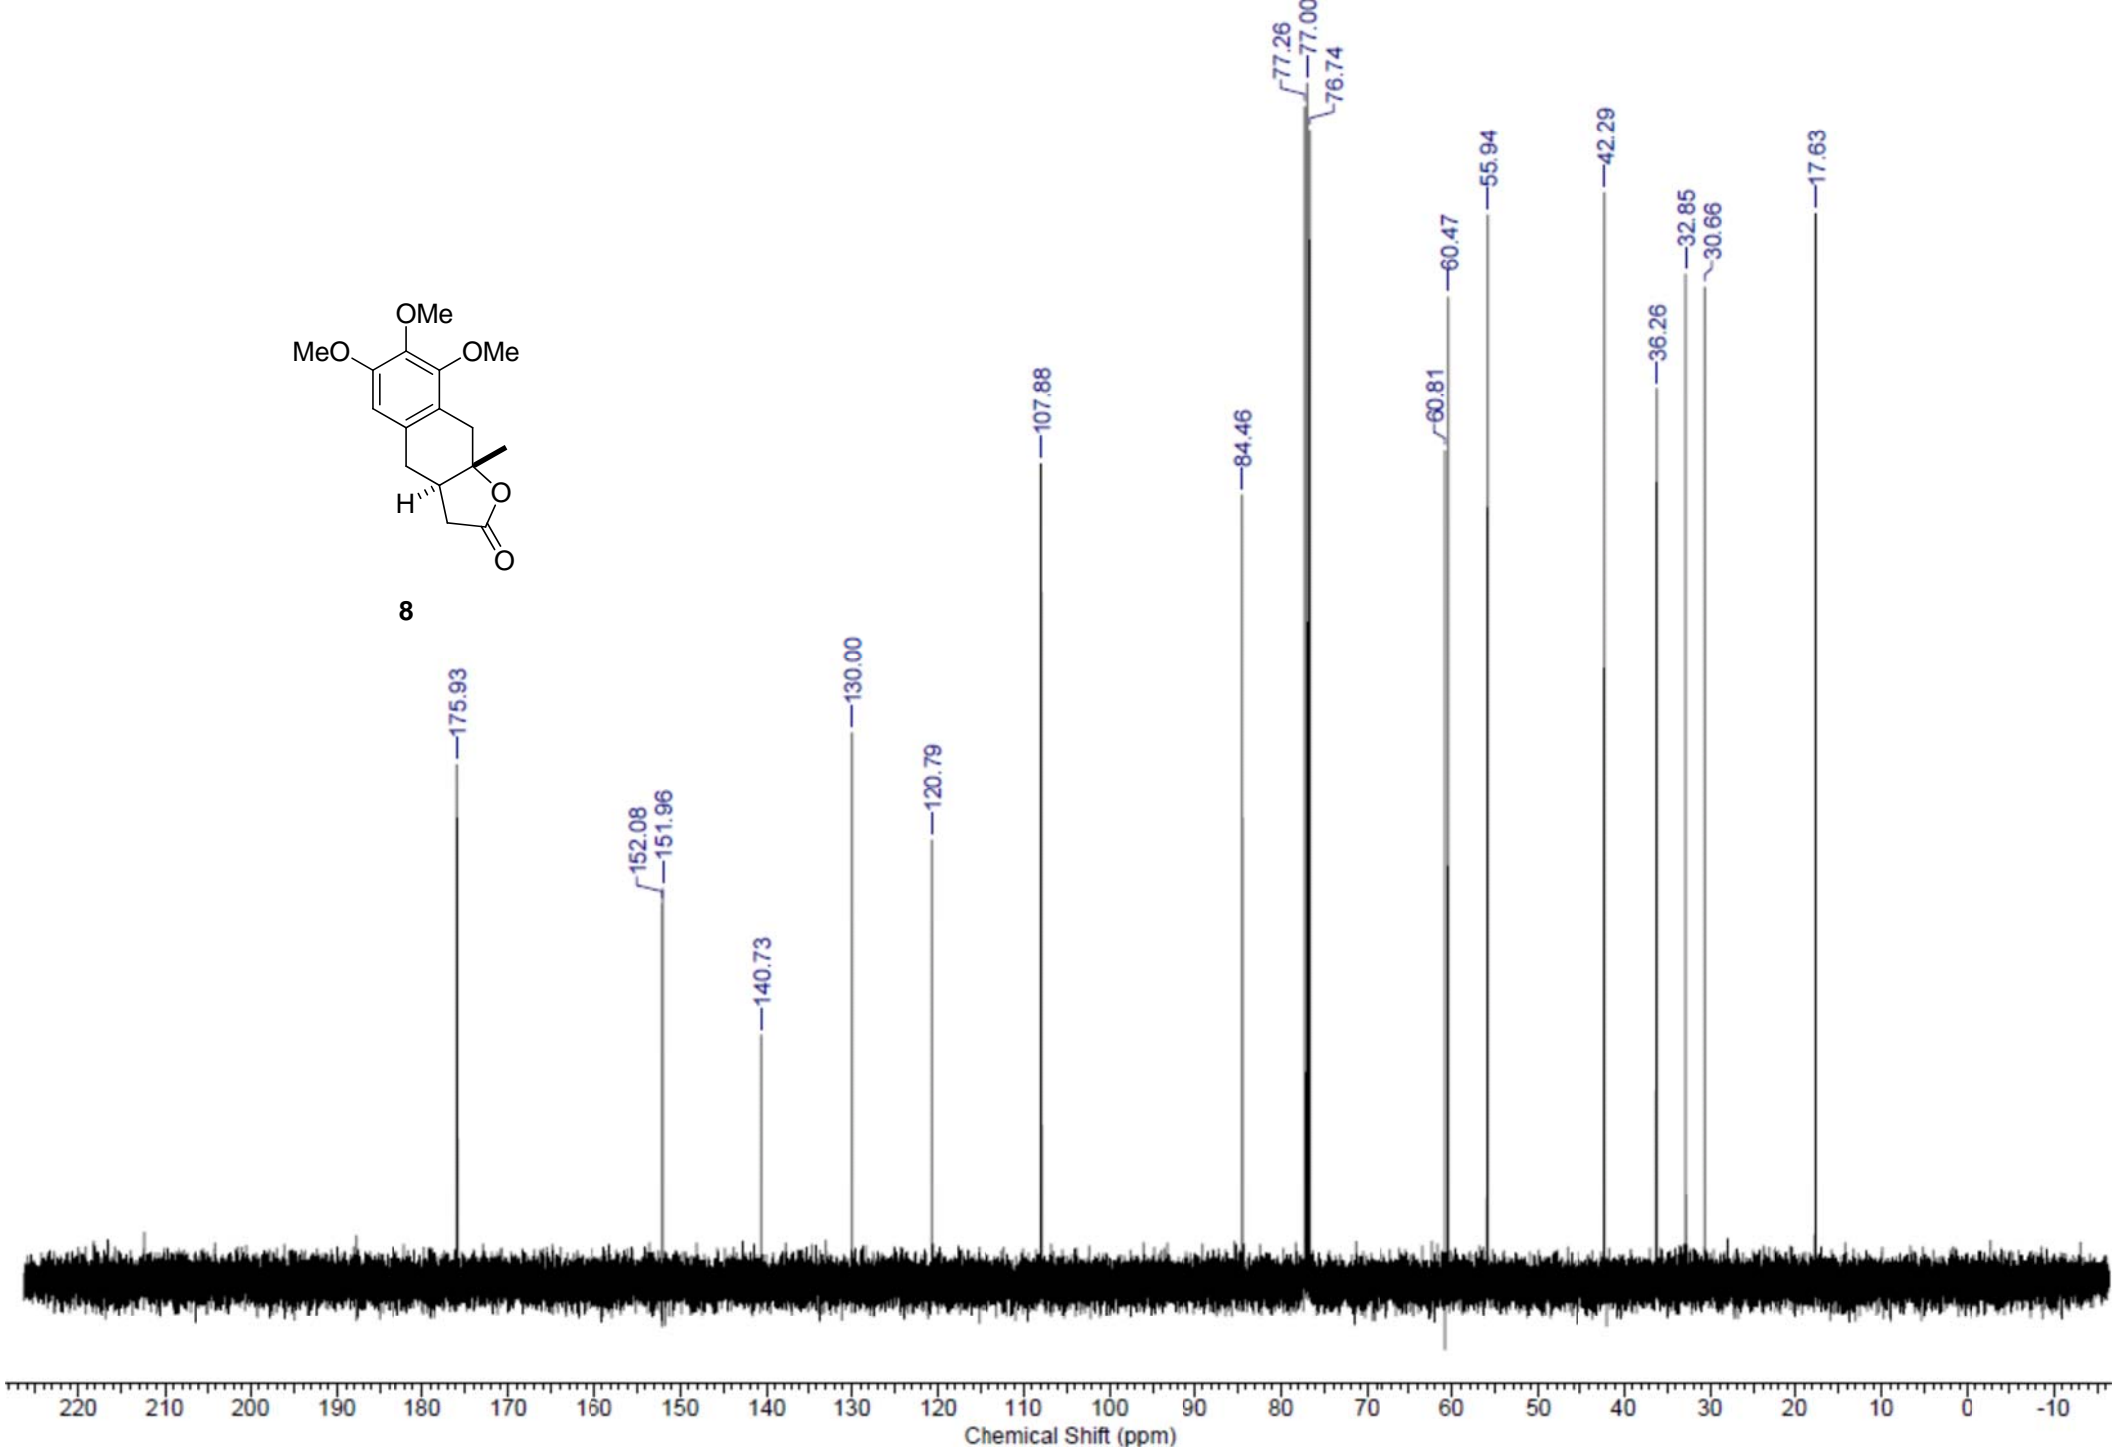

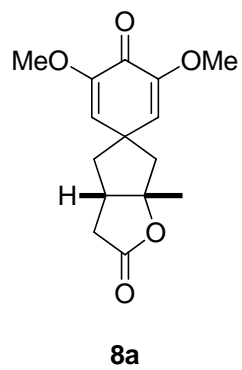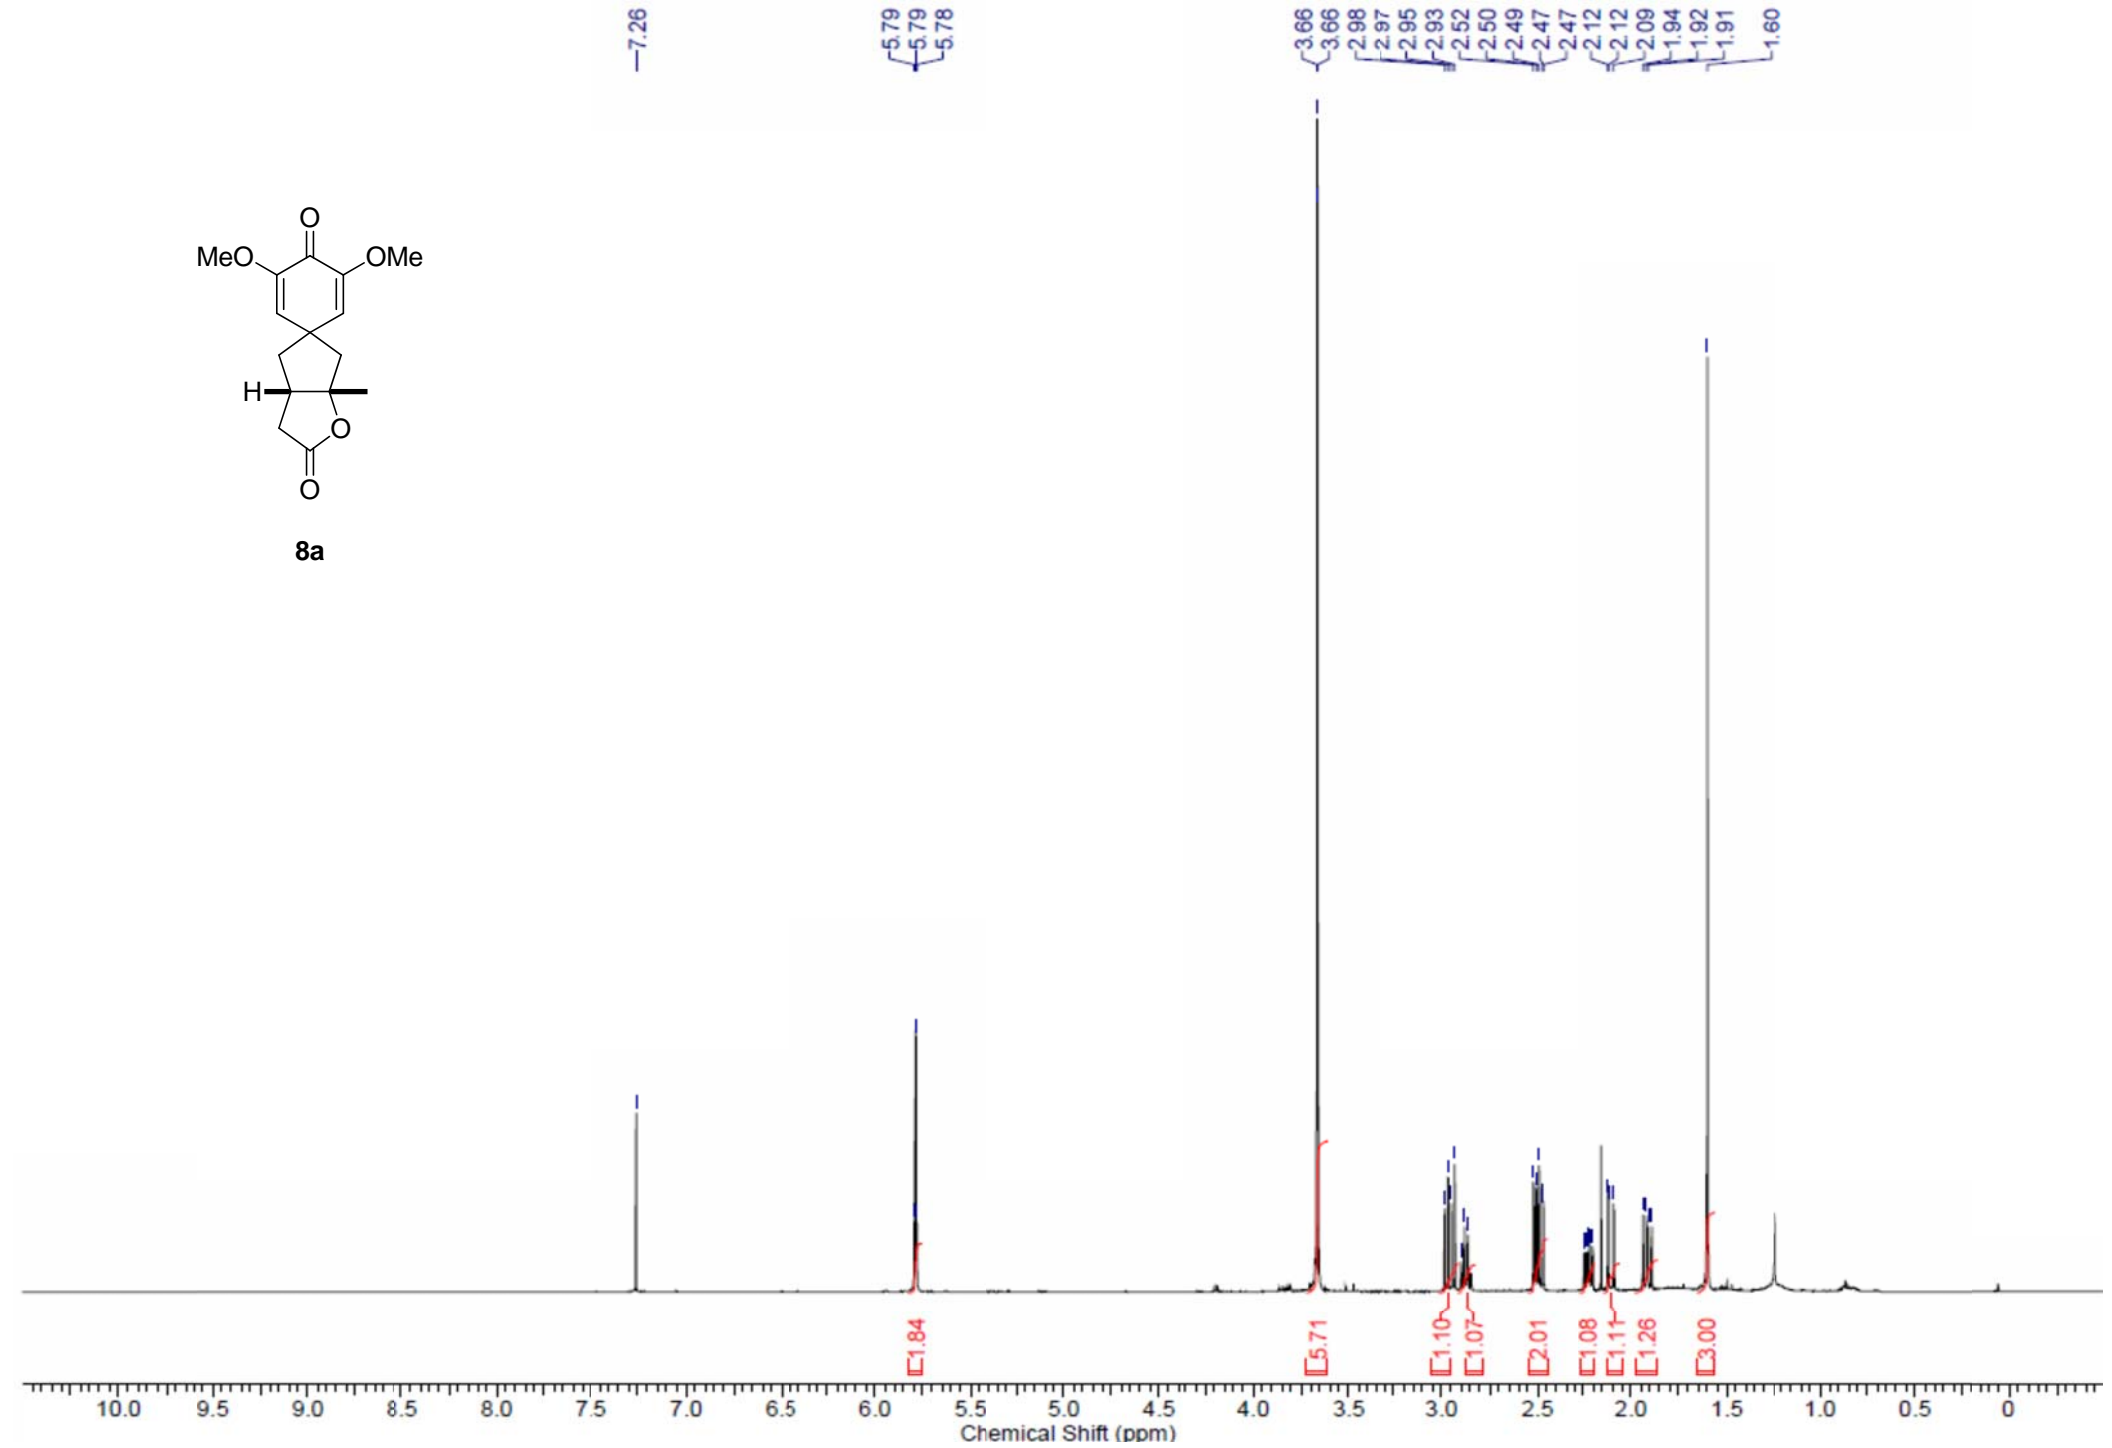

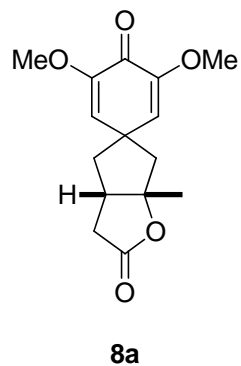

175.99  
175.54

150.31  
150.04

120.90  
119.10

94.85

77.28  
77.03  
76.77

55.26  
55.22  
51.56  
46.44  
46.30  
44.78

35.53

26.52

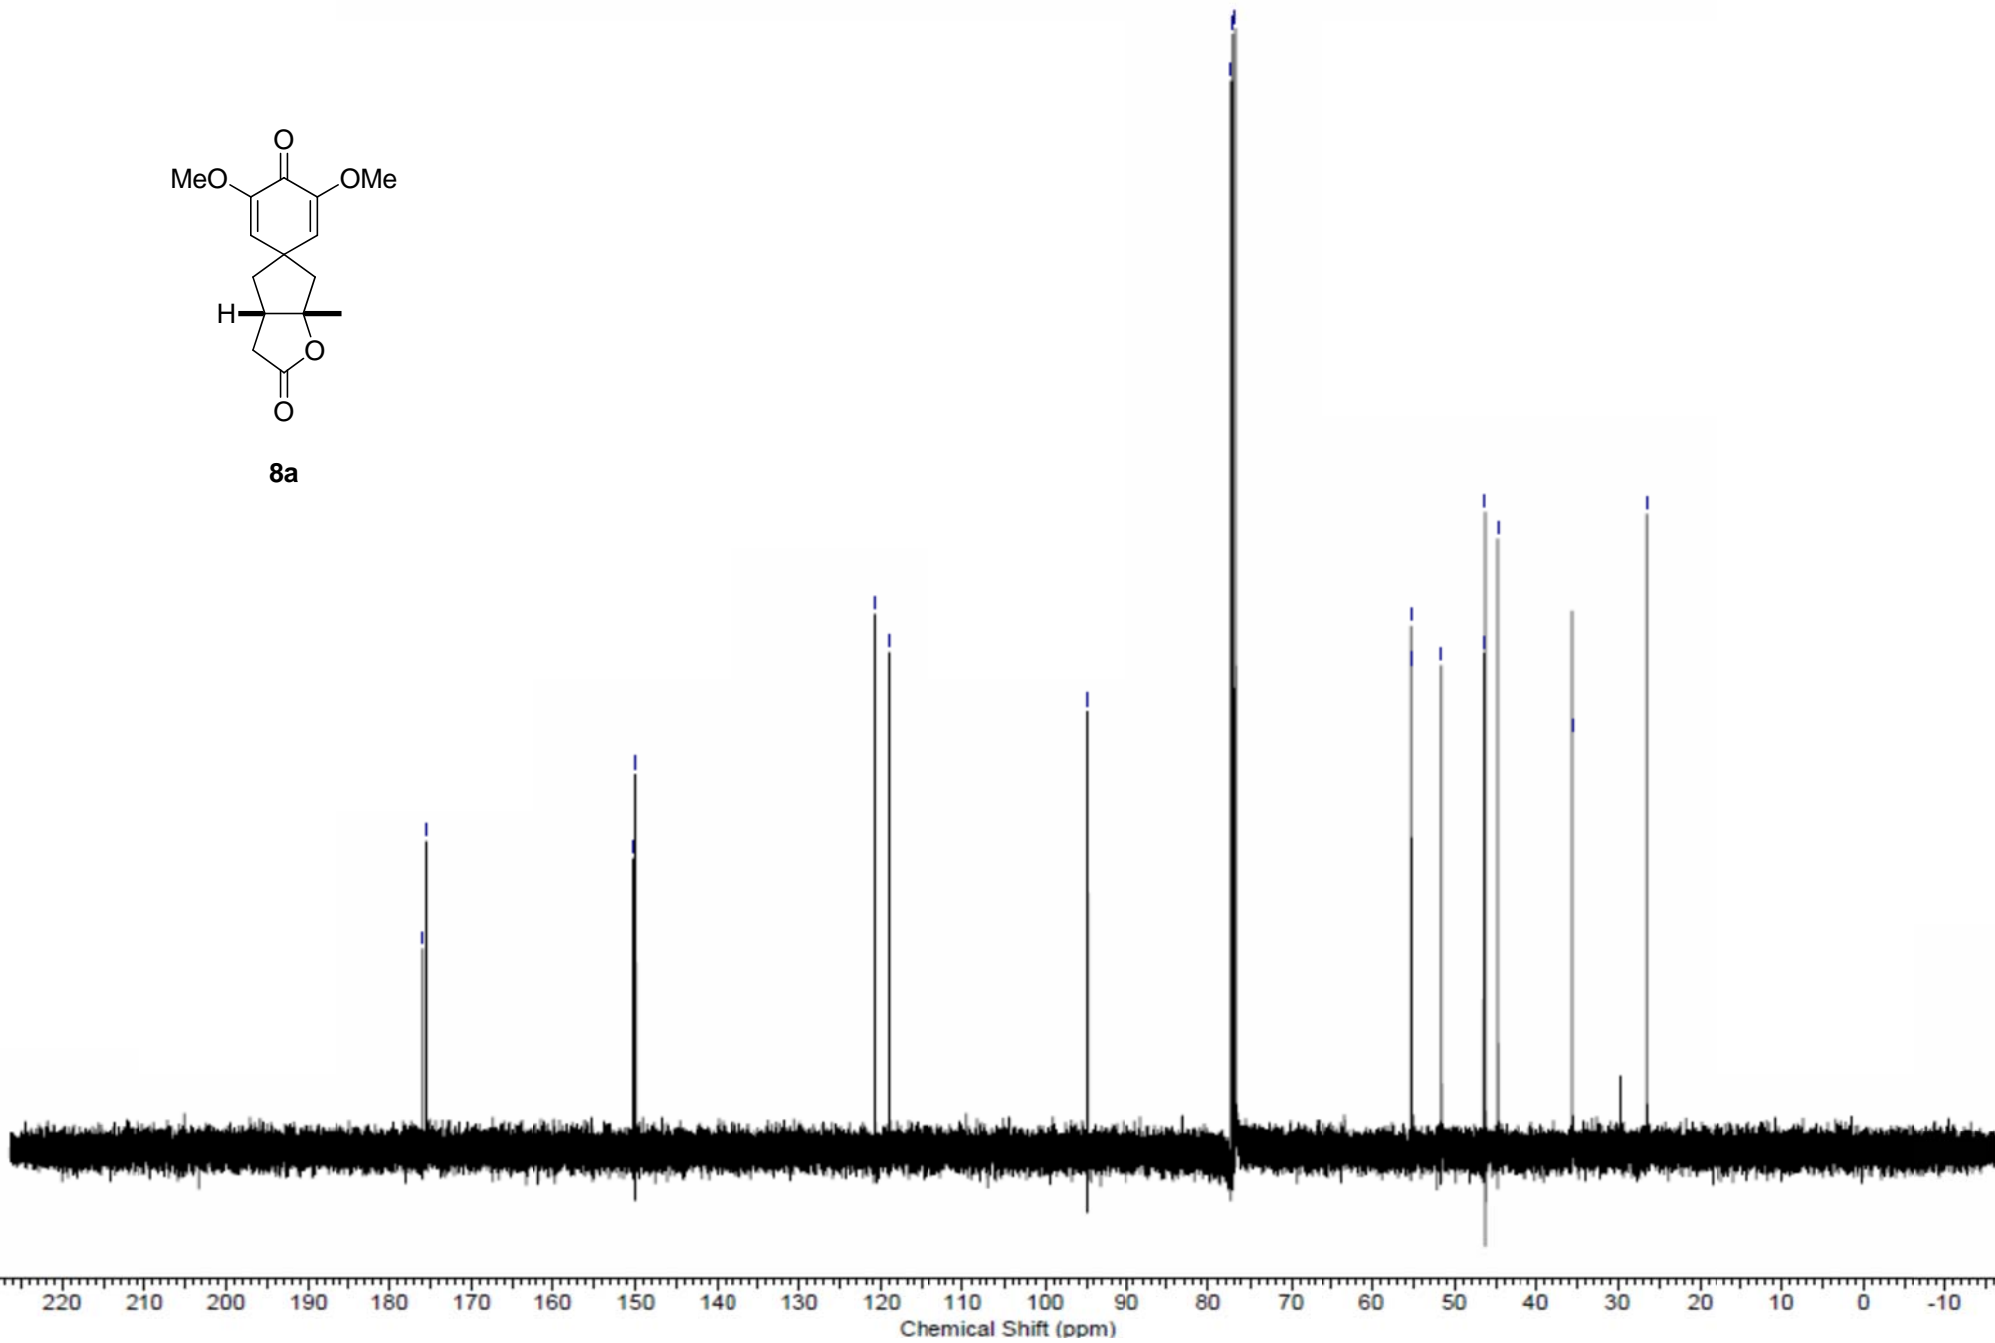



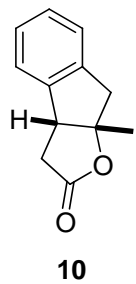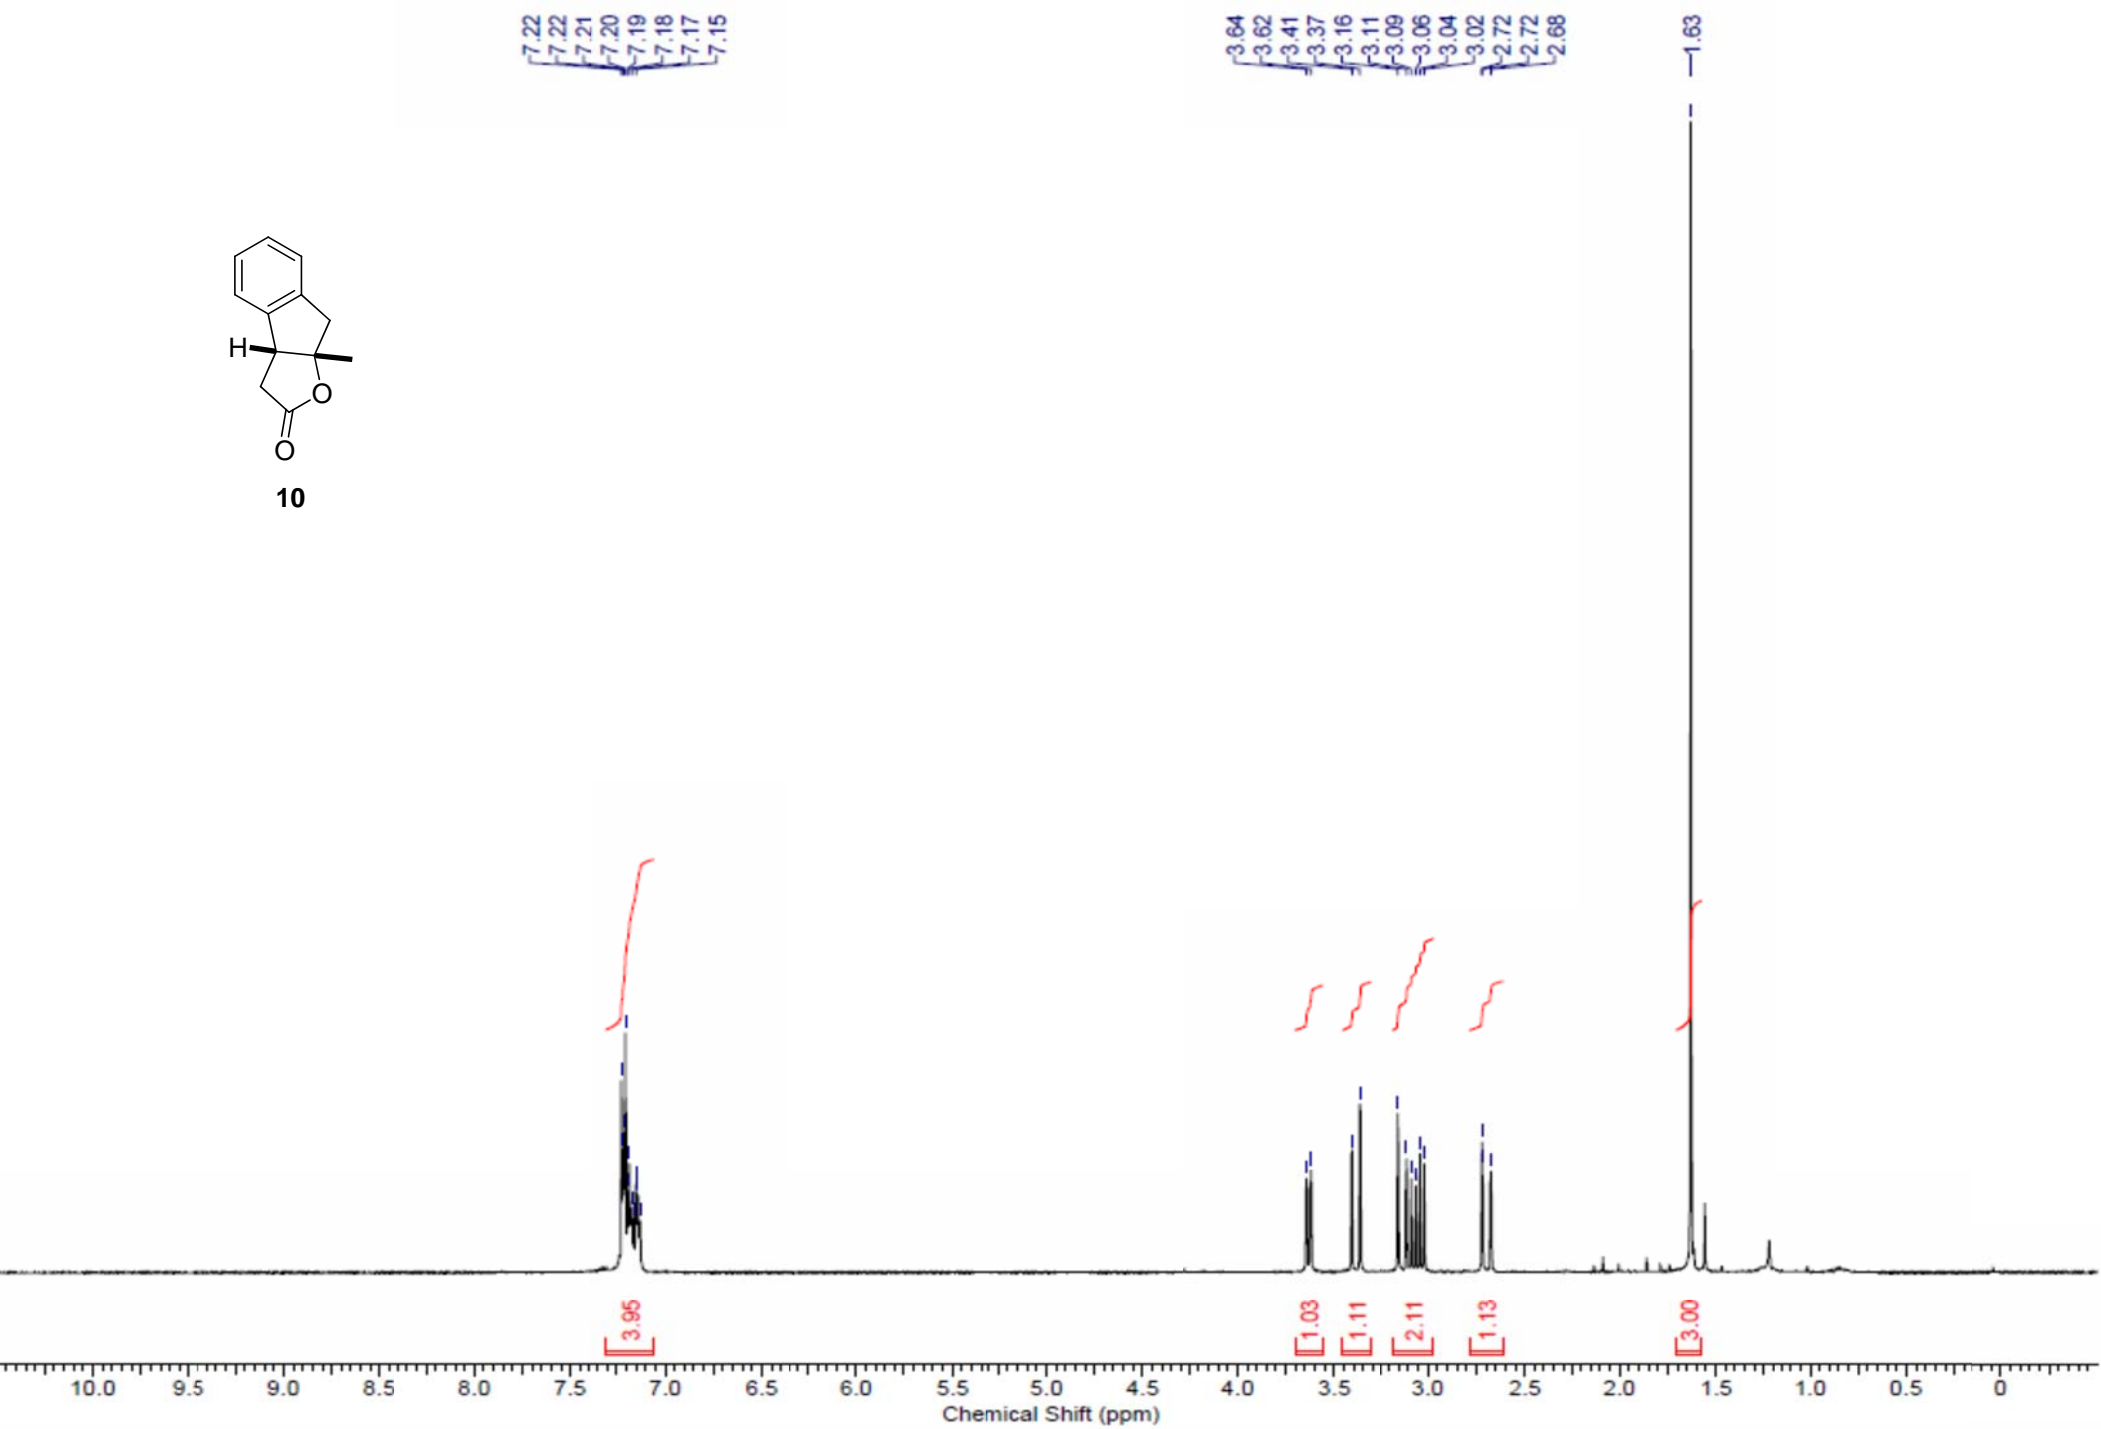

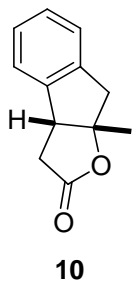

—175.74

—142.56

—140.24

—128.24

—127.65

—125.09

—124.66

—93.79

—77.47

—77.05

—76.63

—50.54

—44.85

—35.46

—24.48

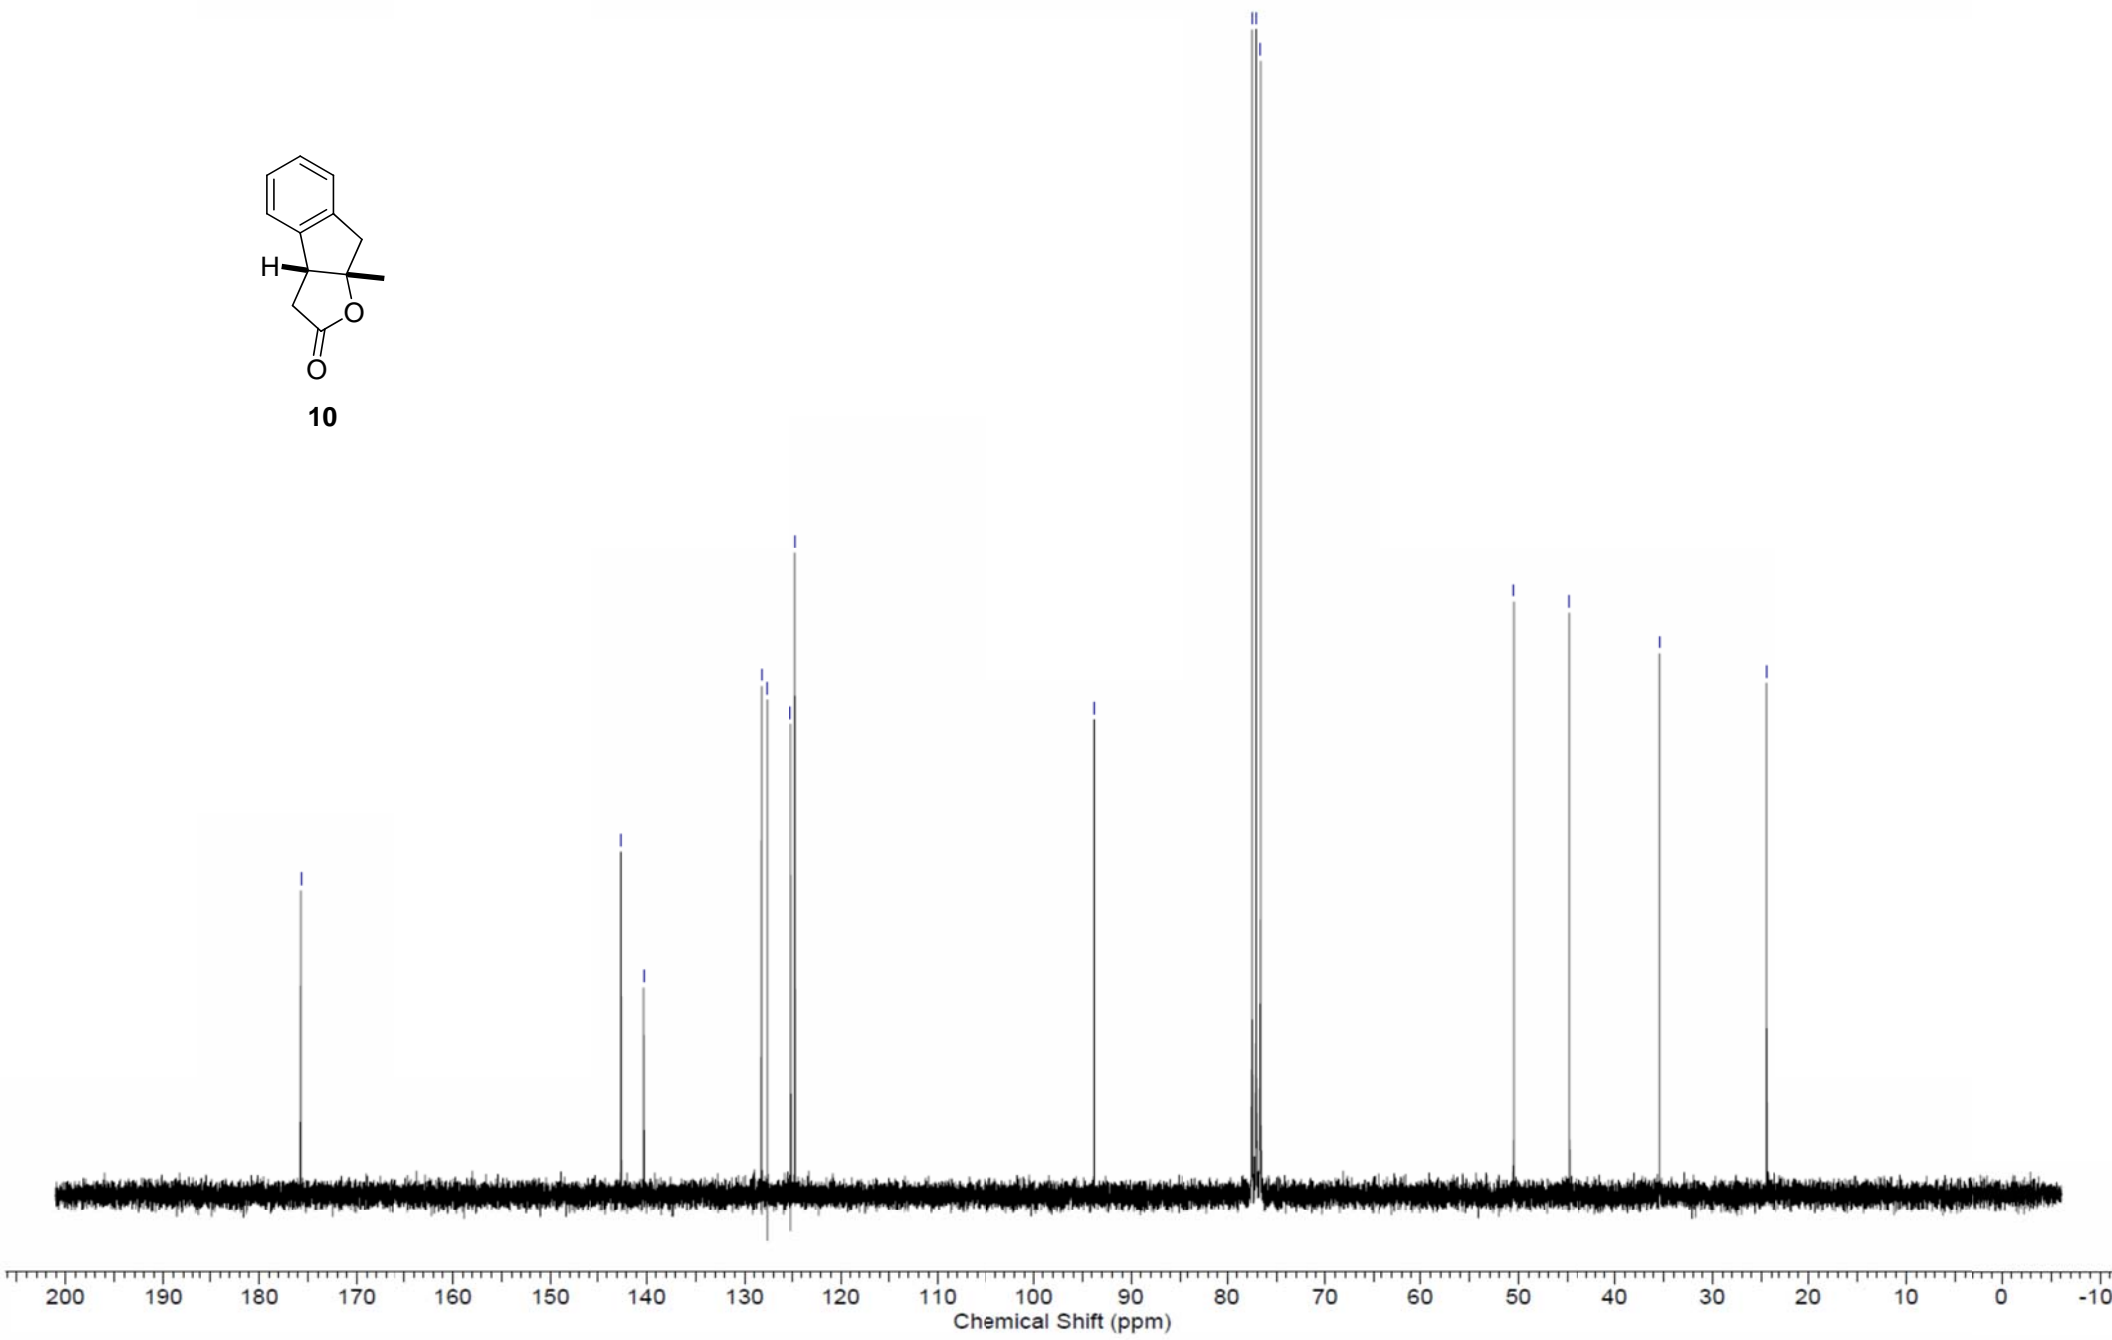

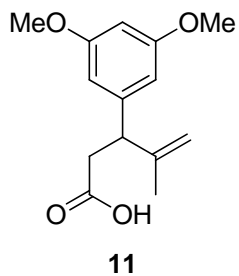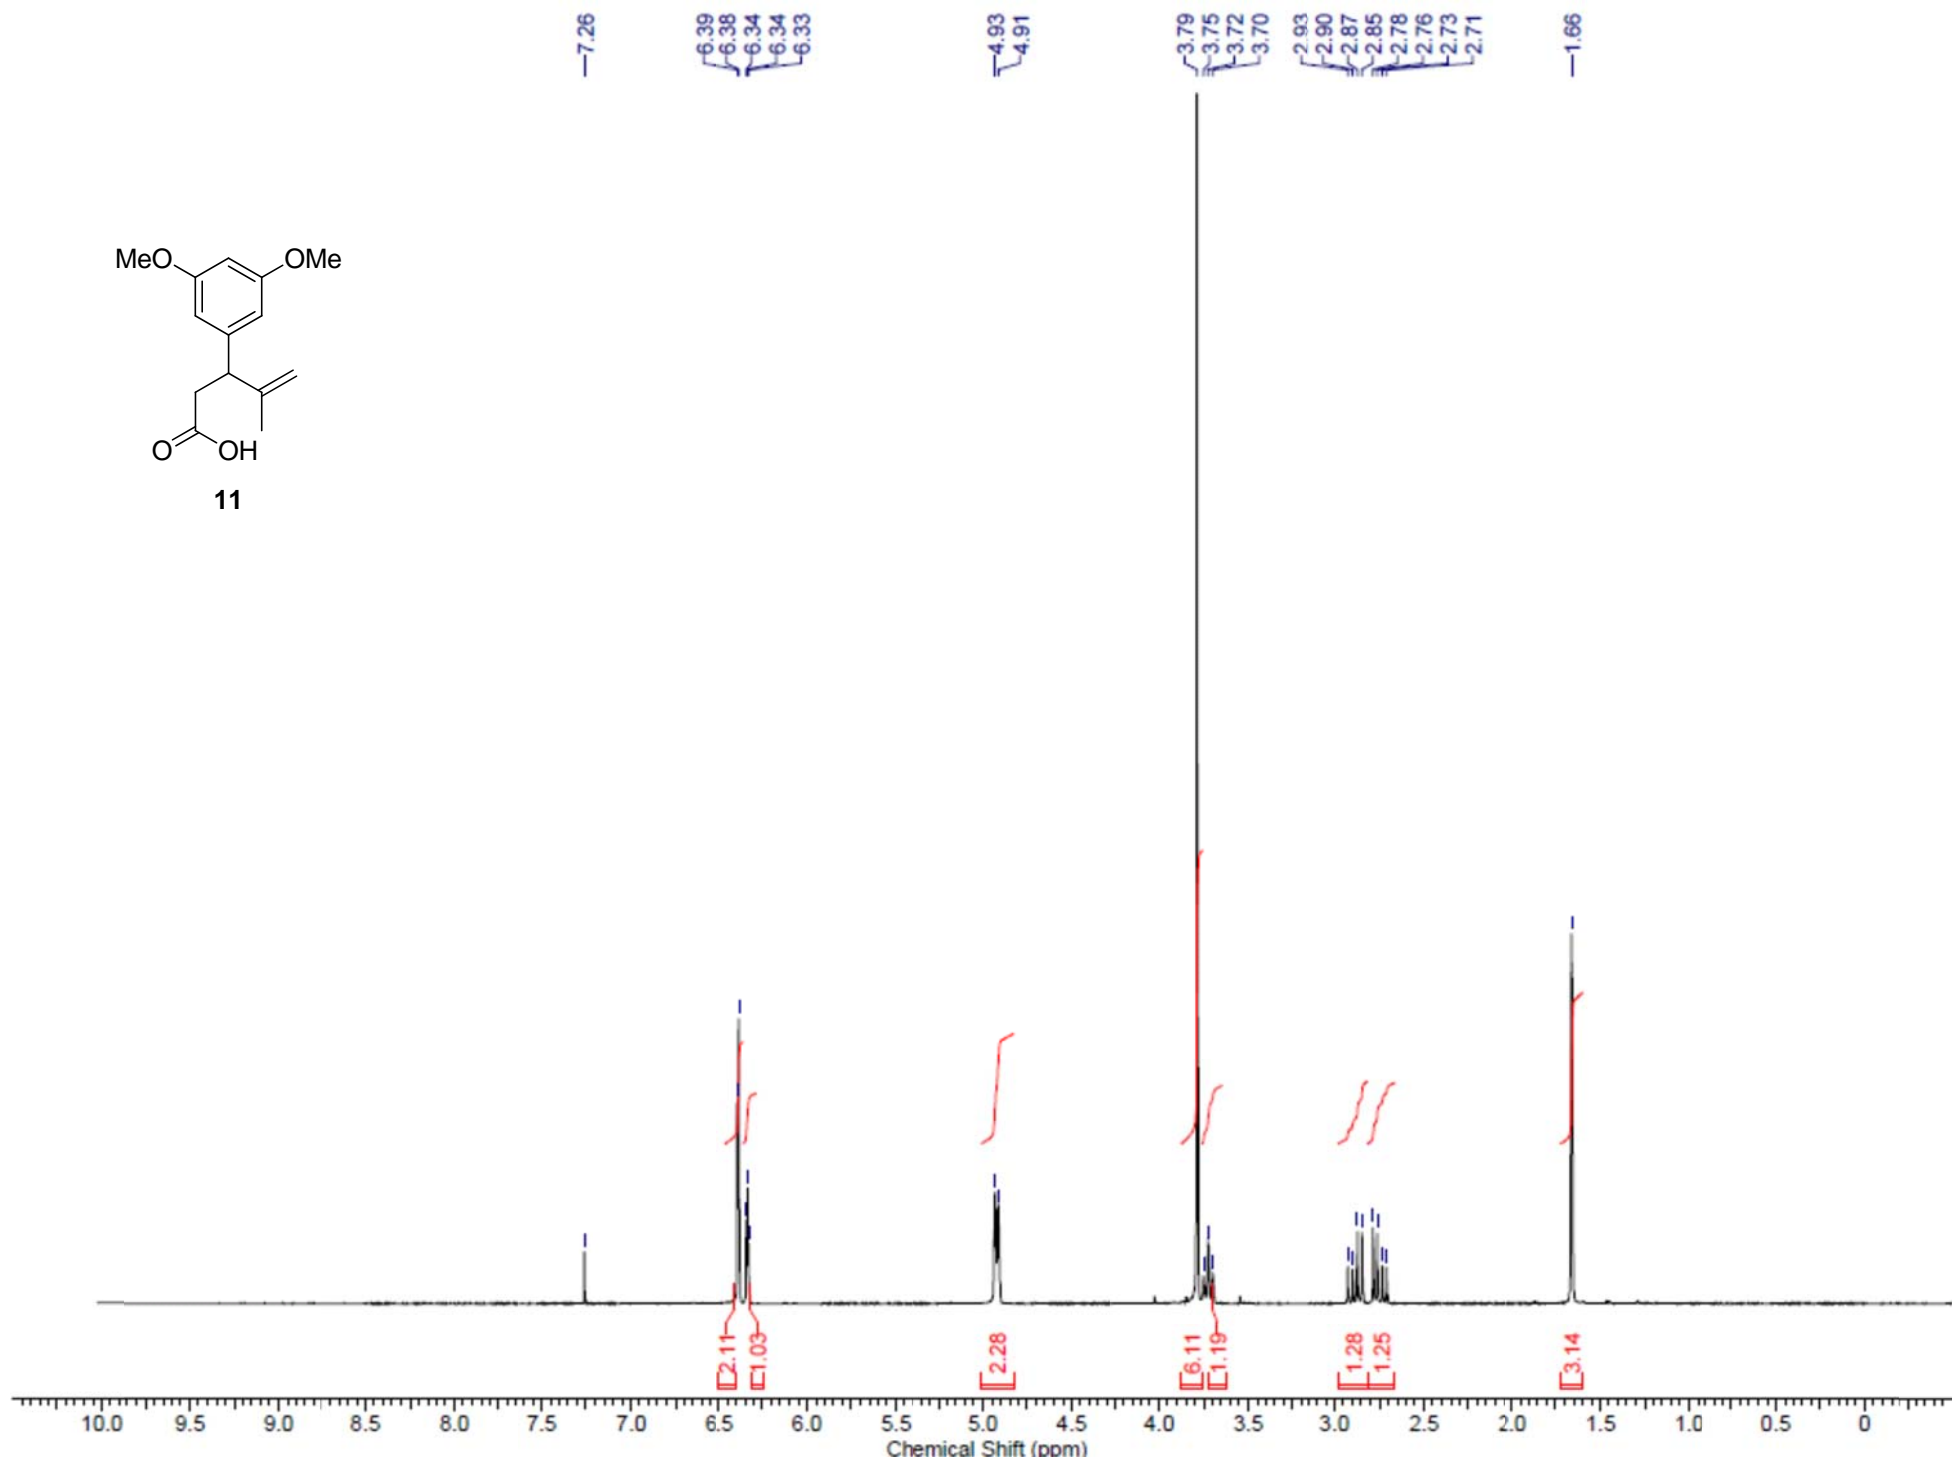

S43

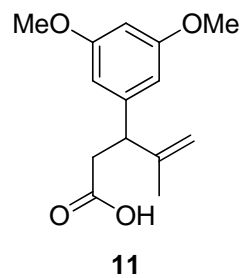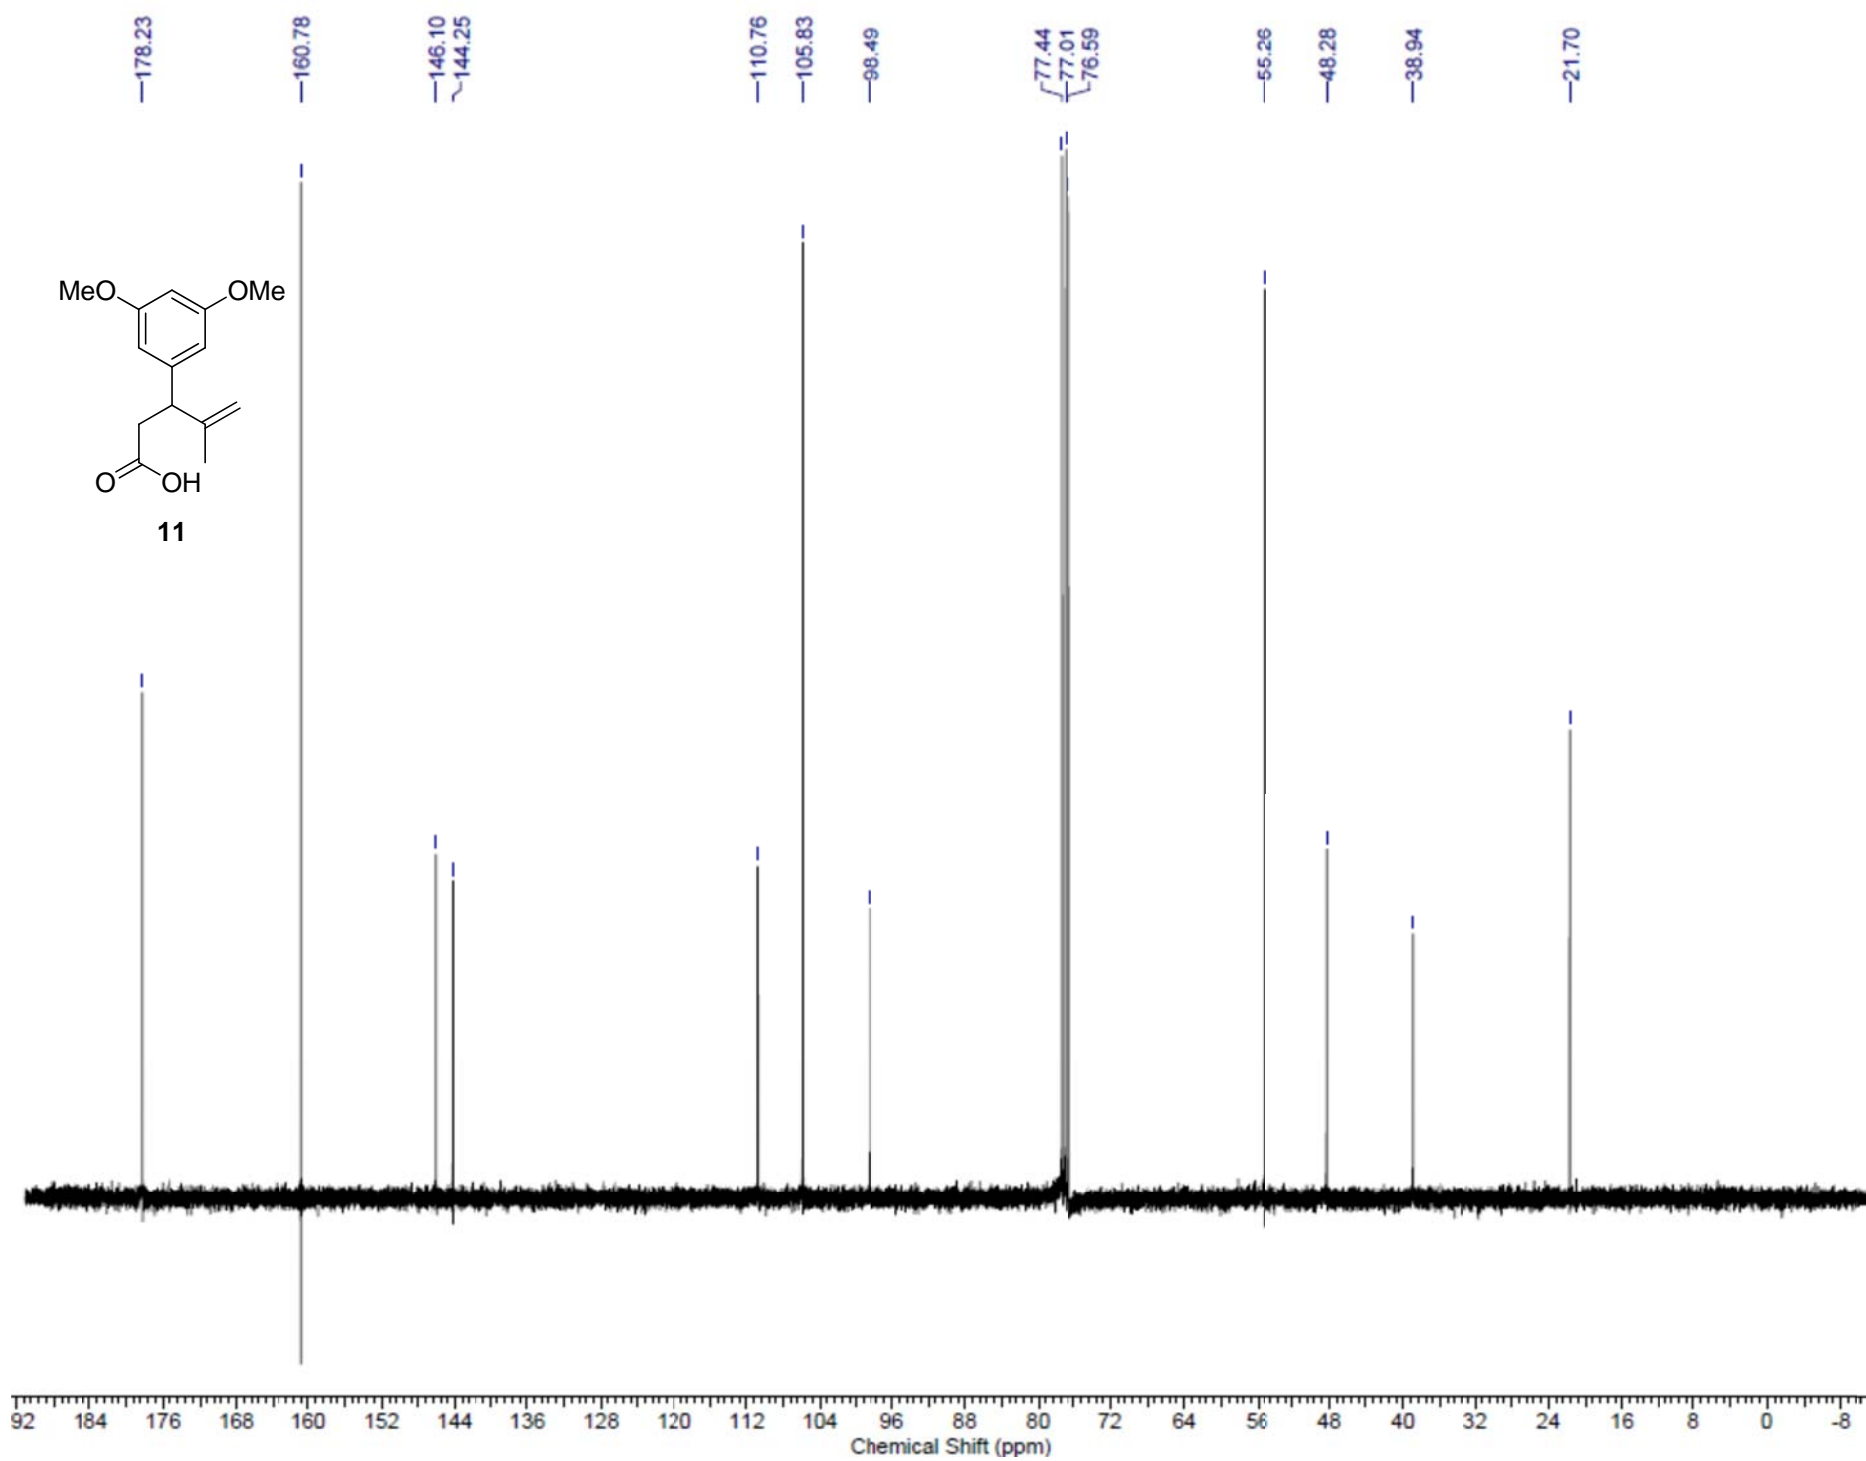

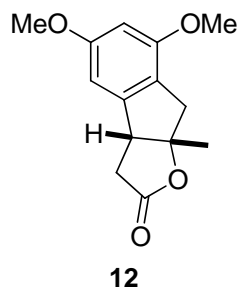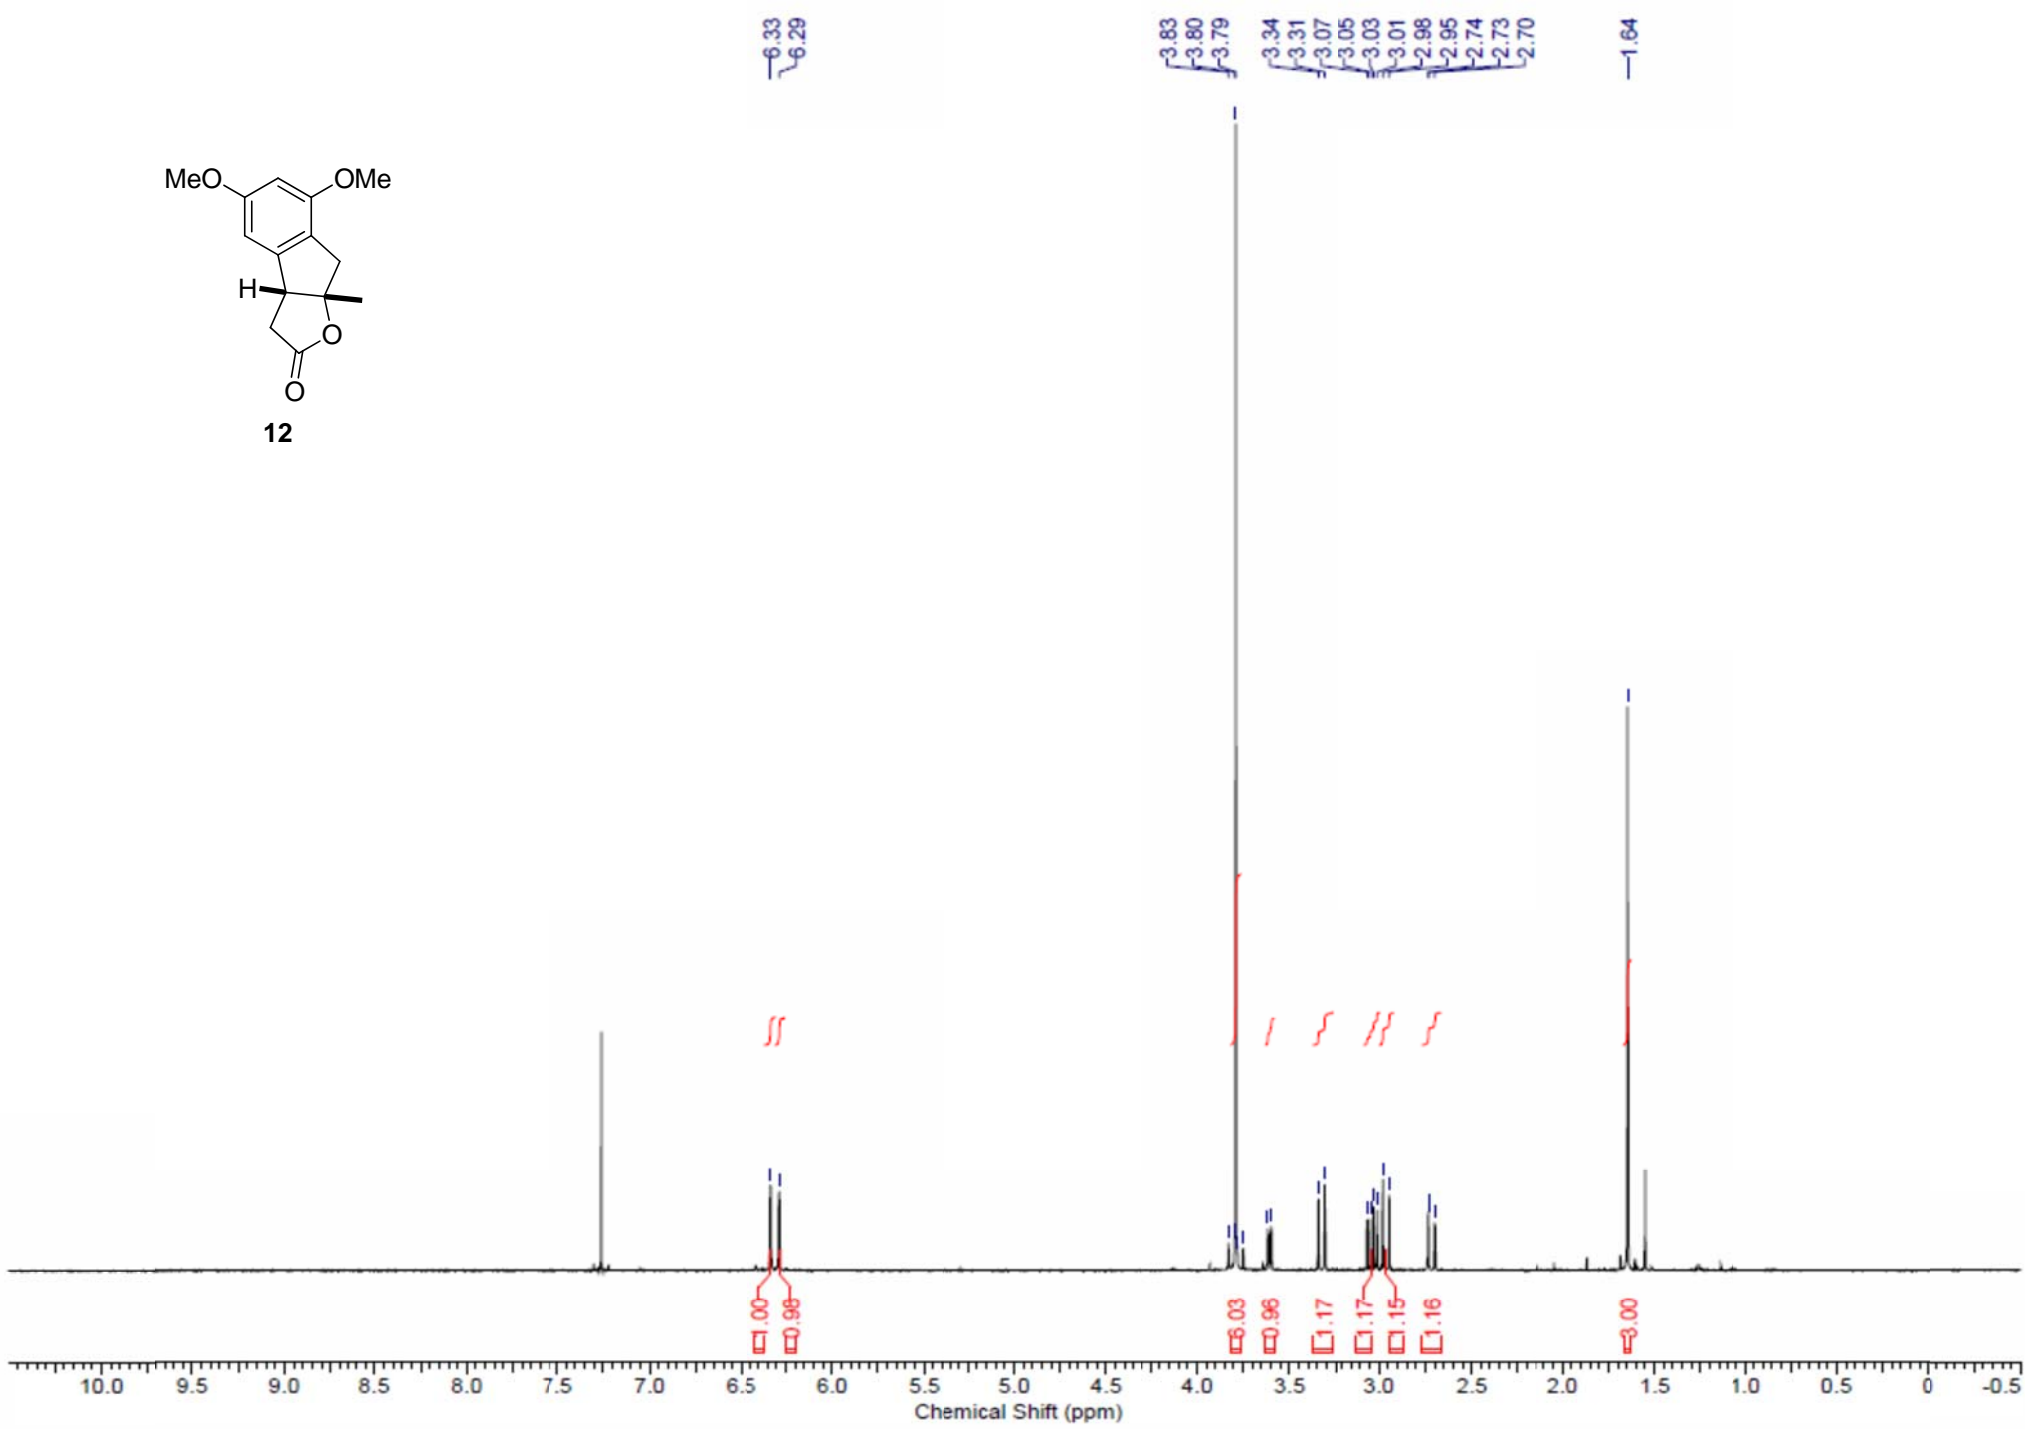

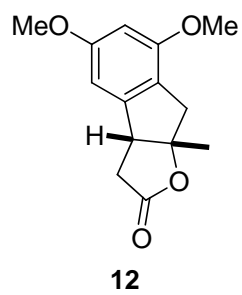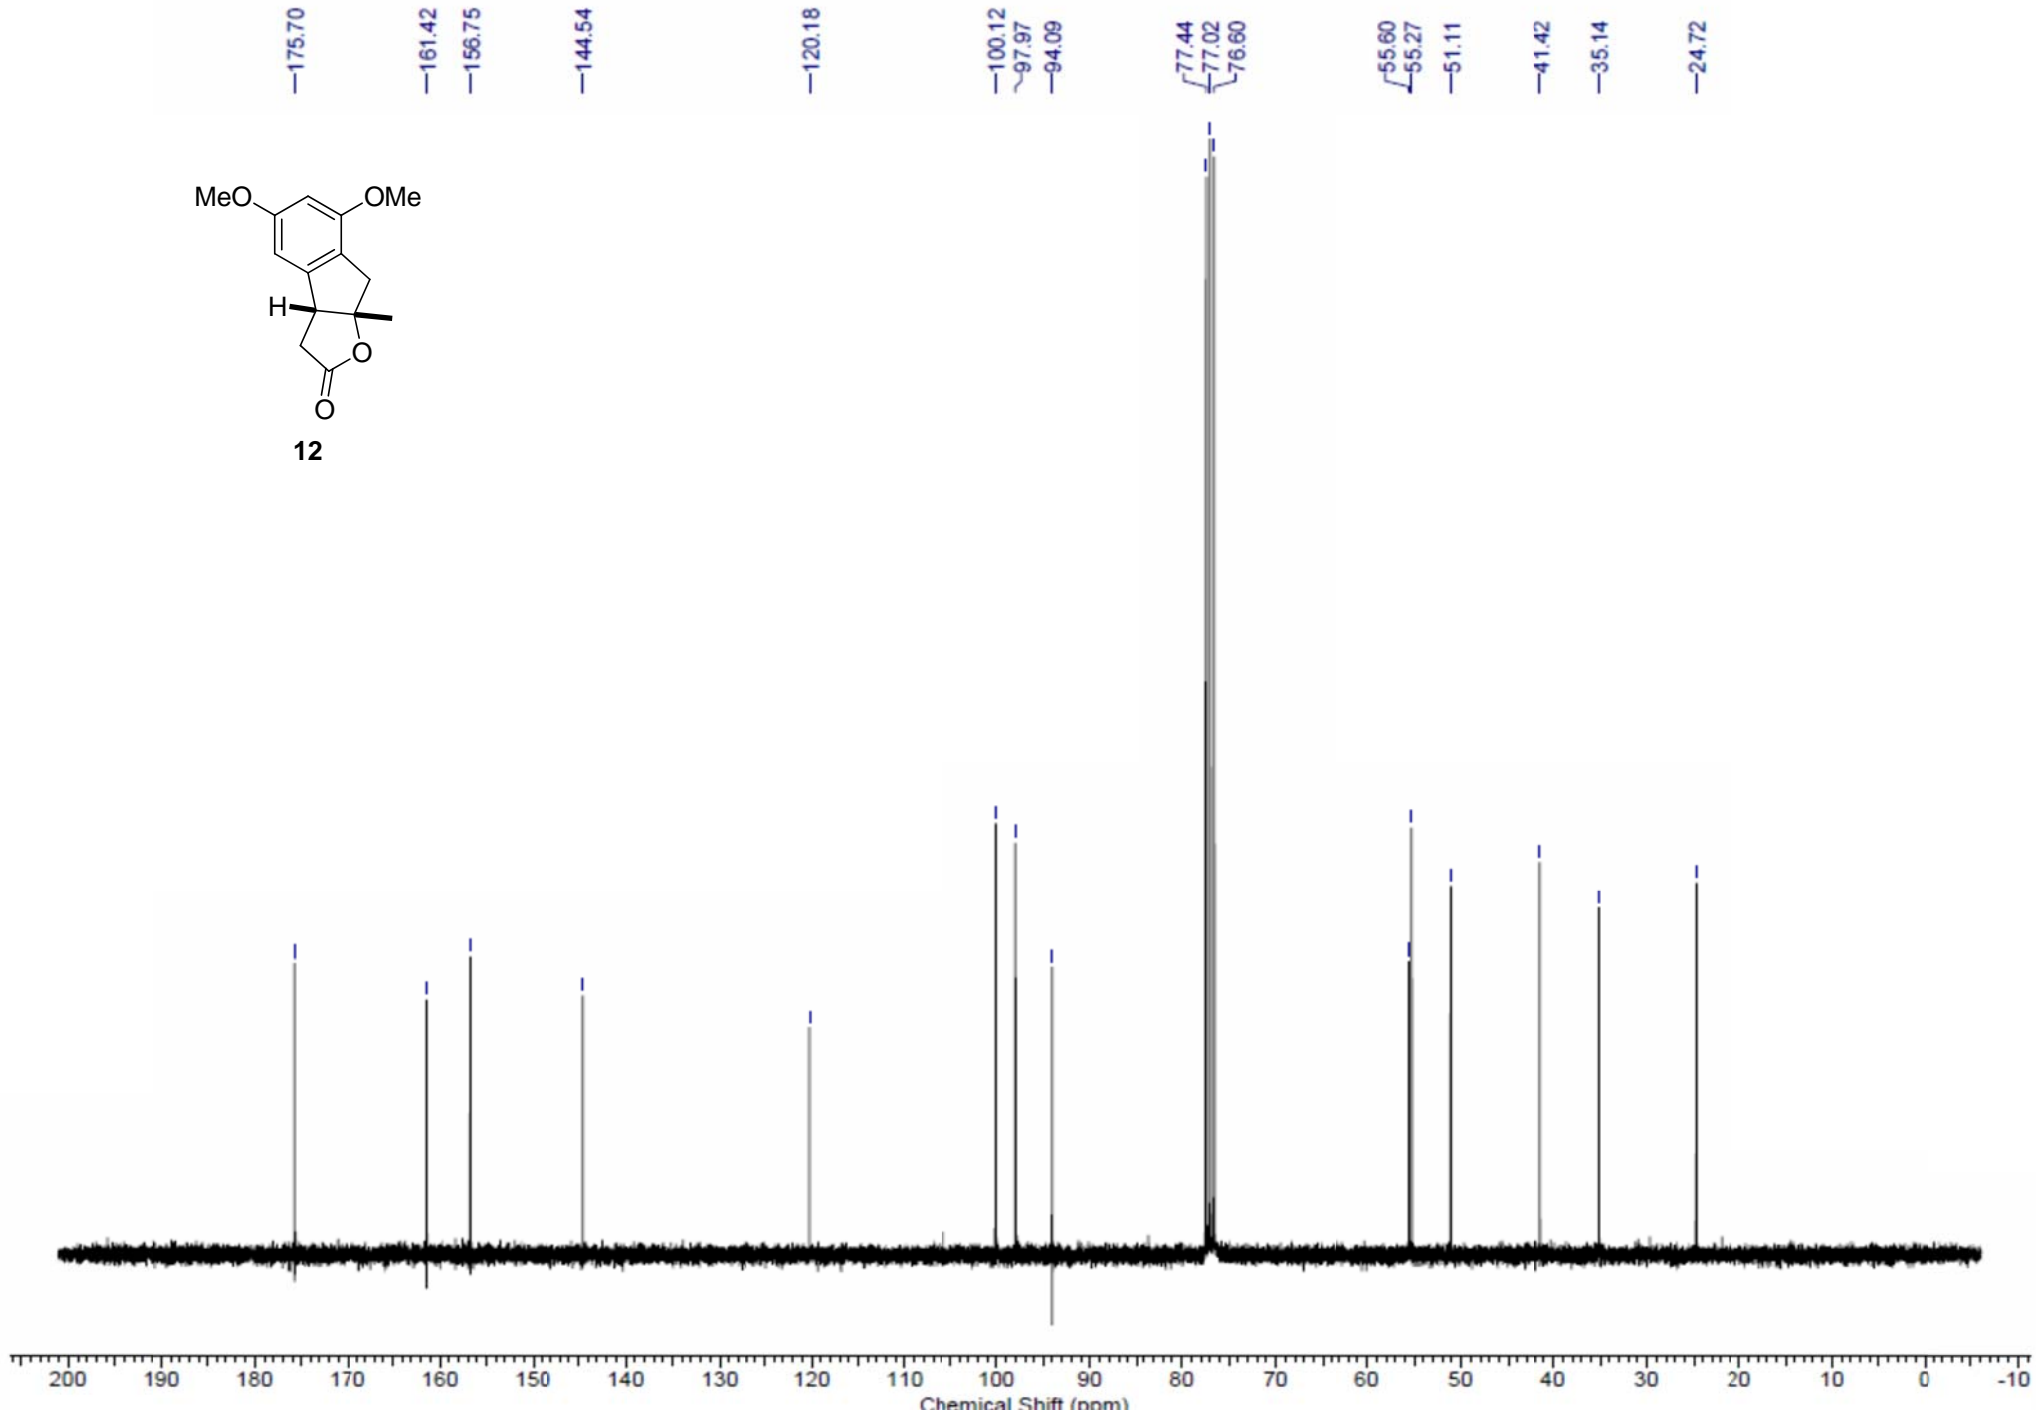

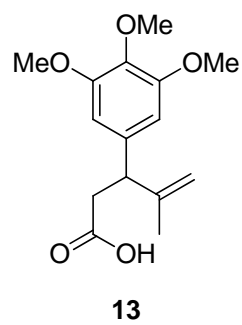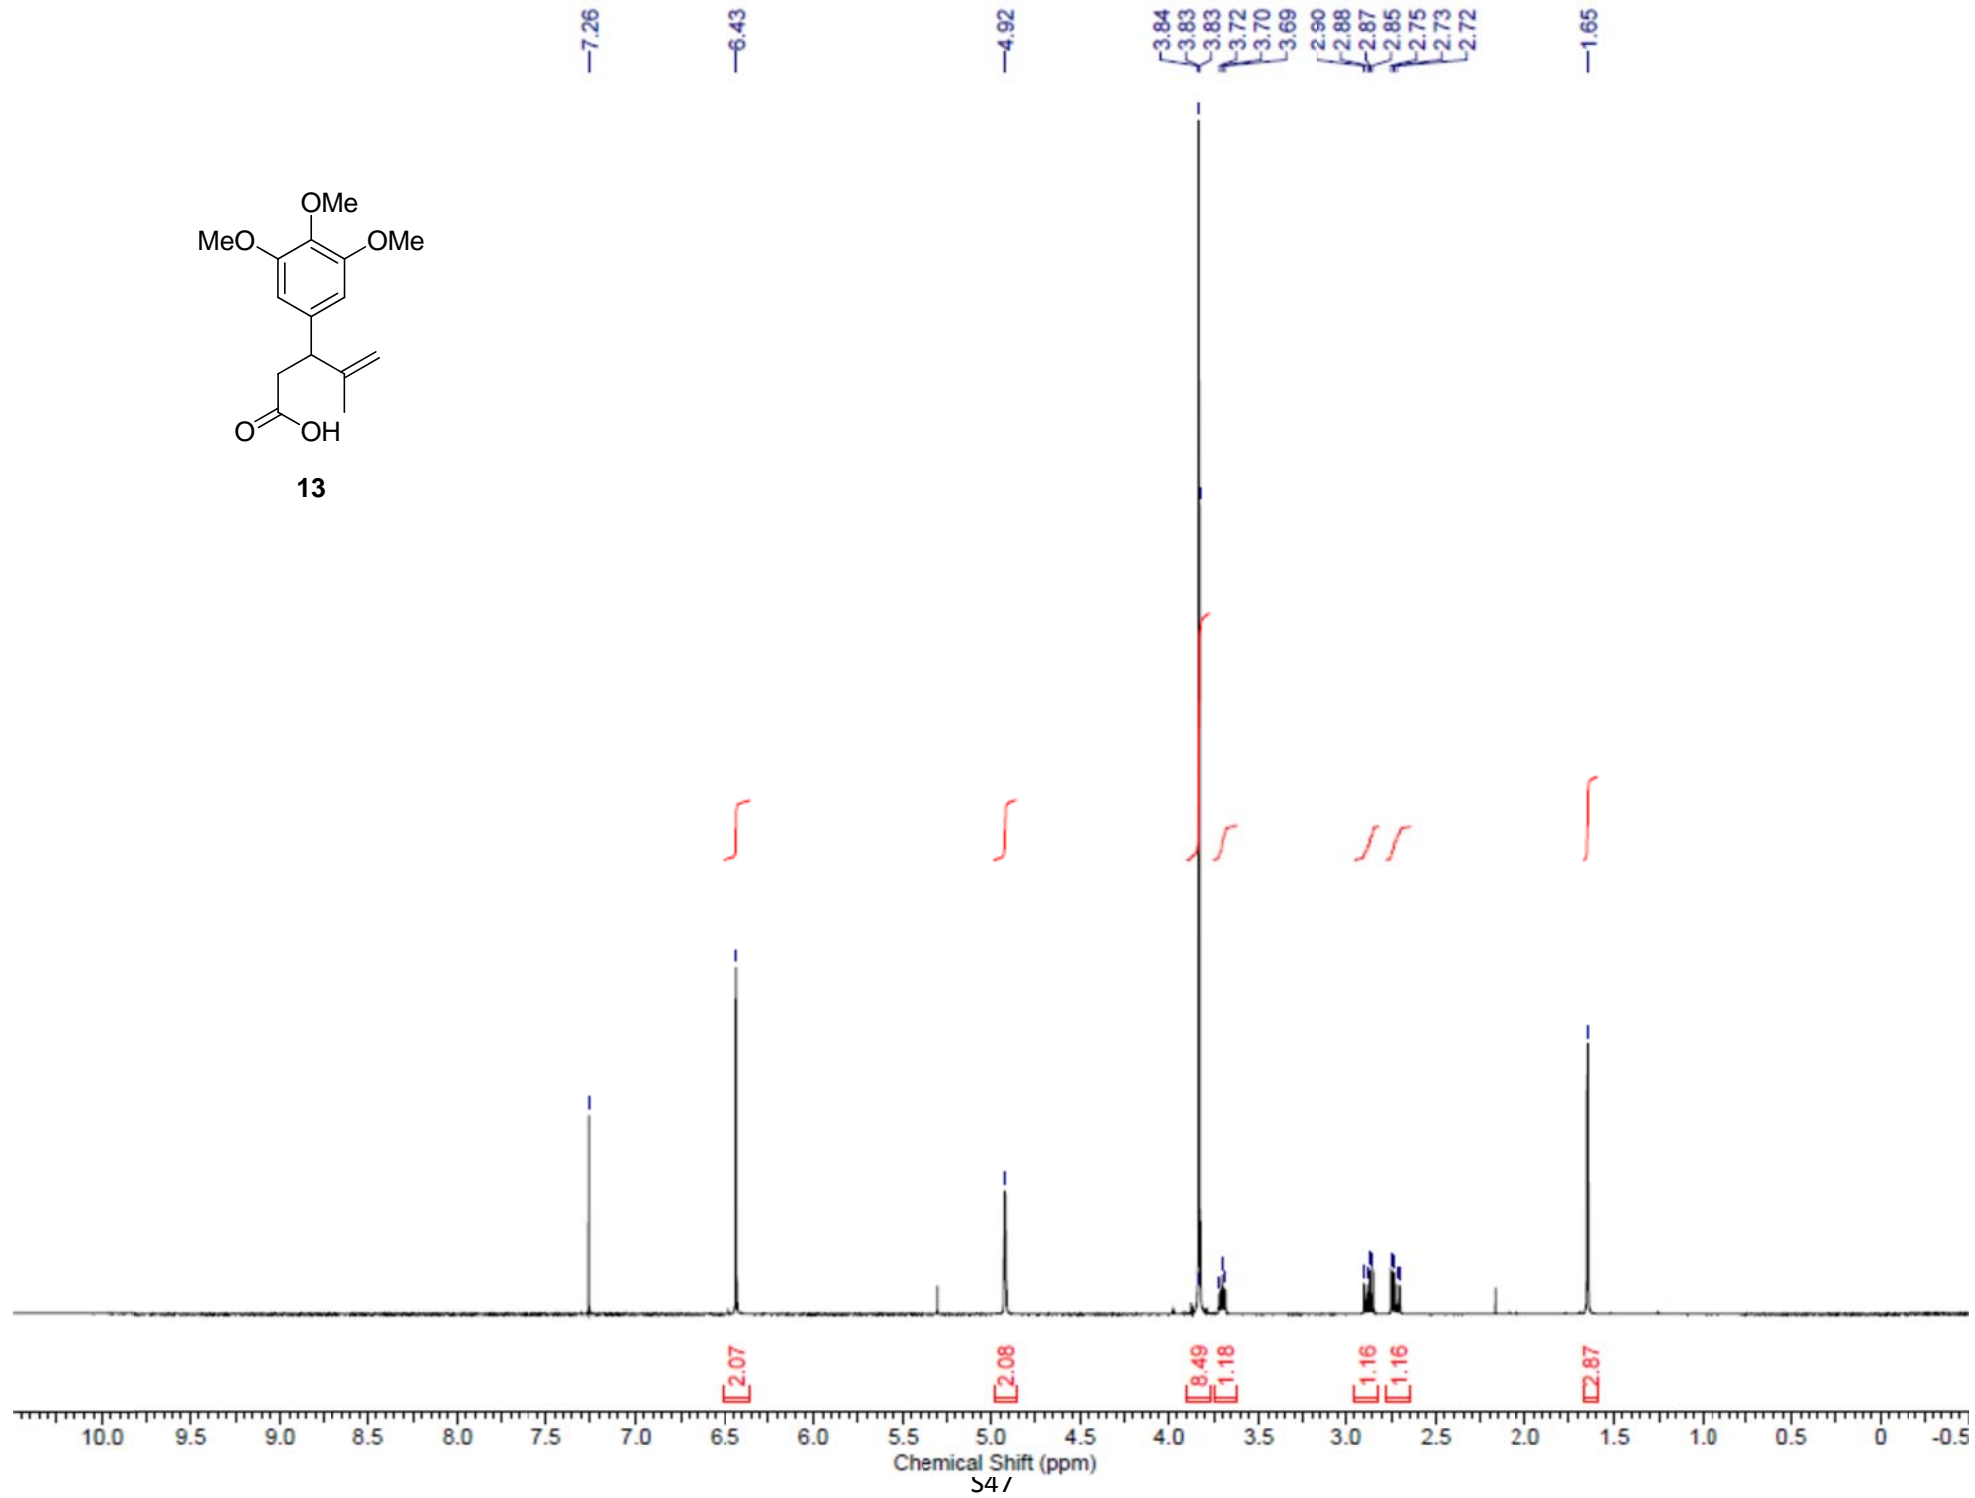

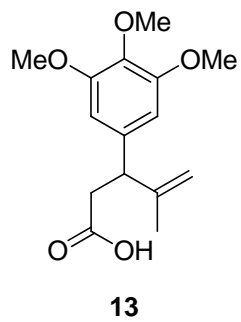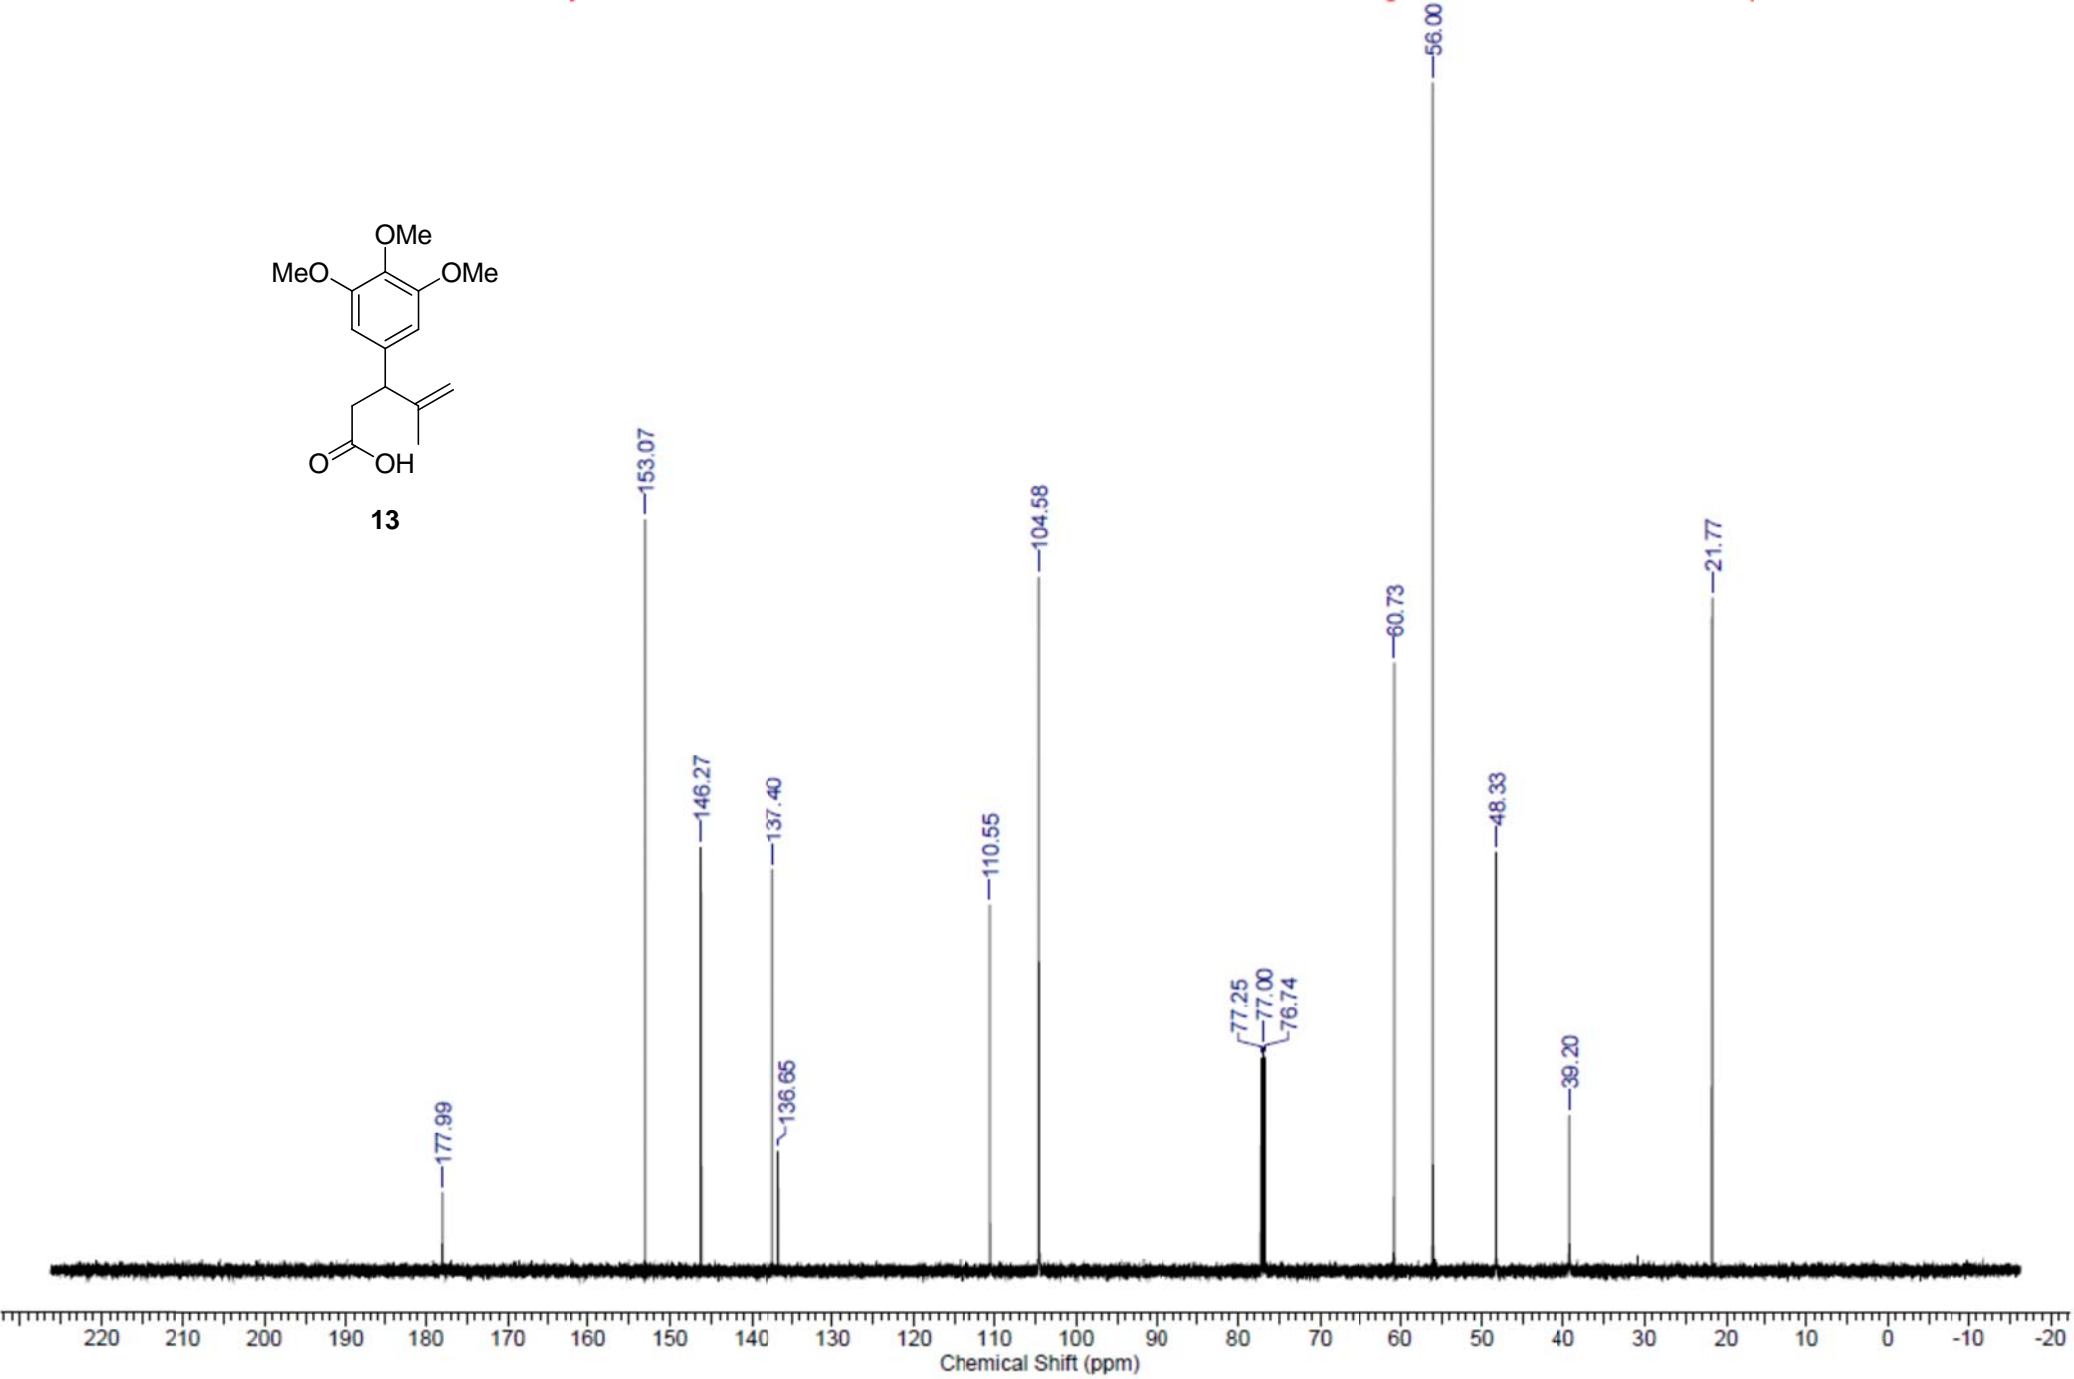



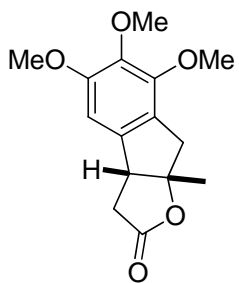

14

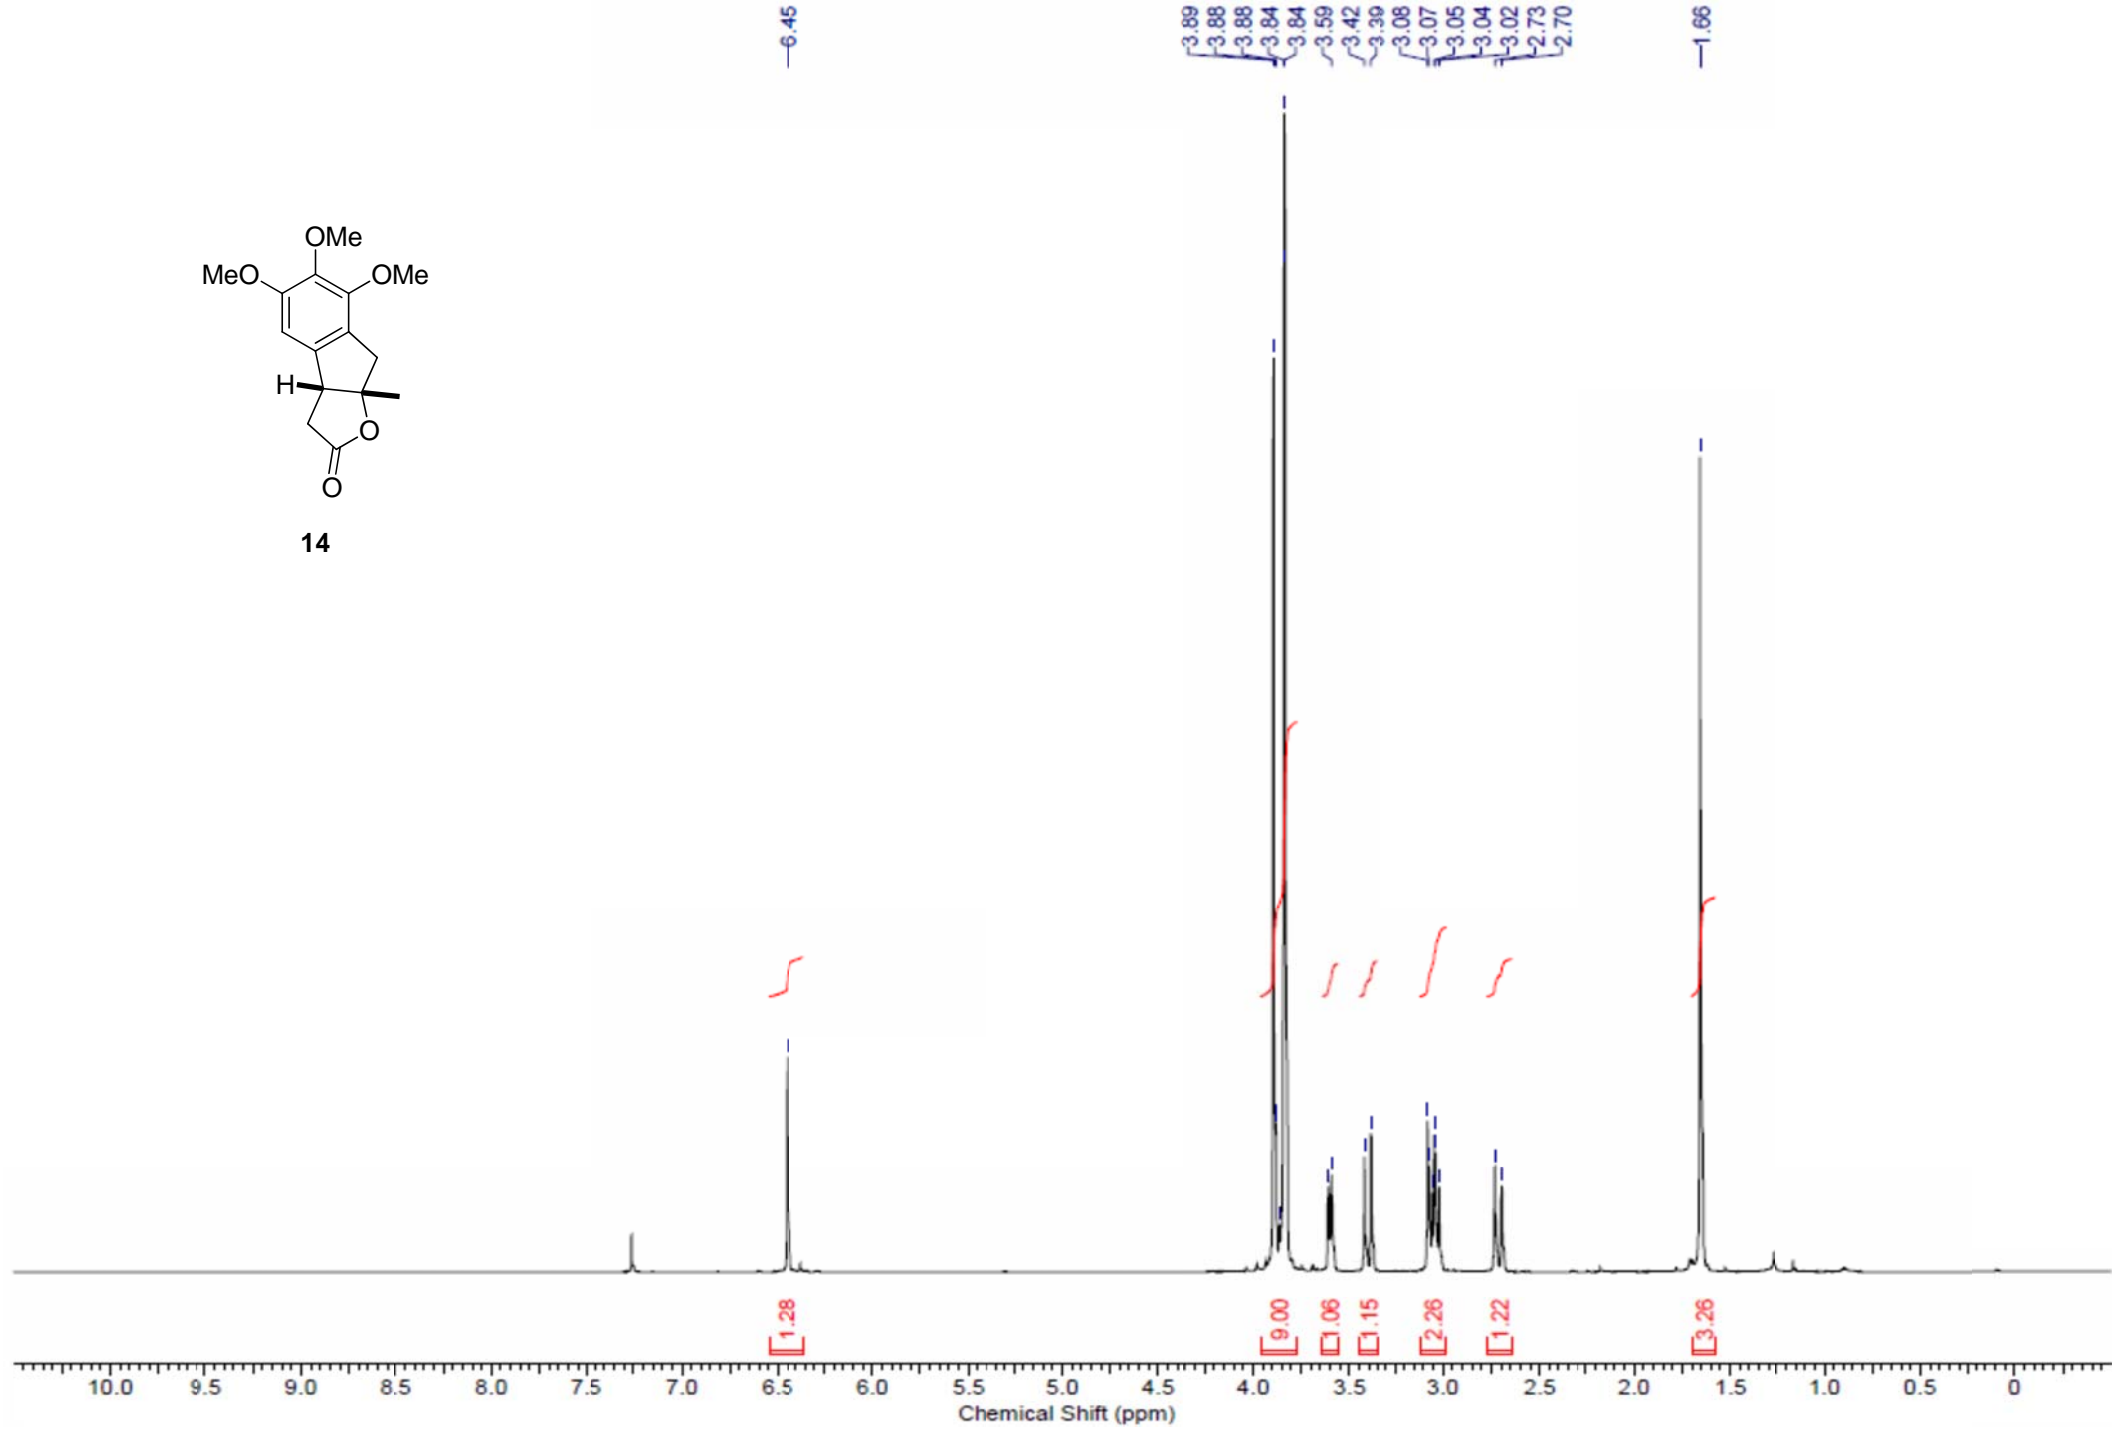

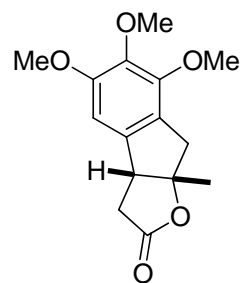

14

—175.61 —154.21 —149.81 —141.63 —137.84 —124.69 —103.09 —93.97 {77.31 {77.05 {76.80 {60.99 {60.40 {56.29 —50.90 —42.13 —35.32 —24.55

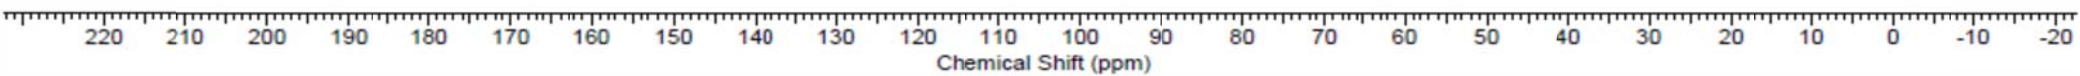

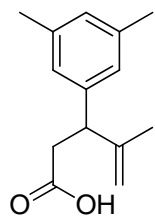

15

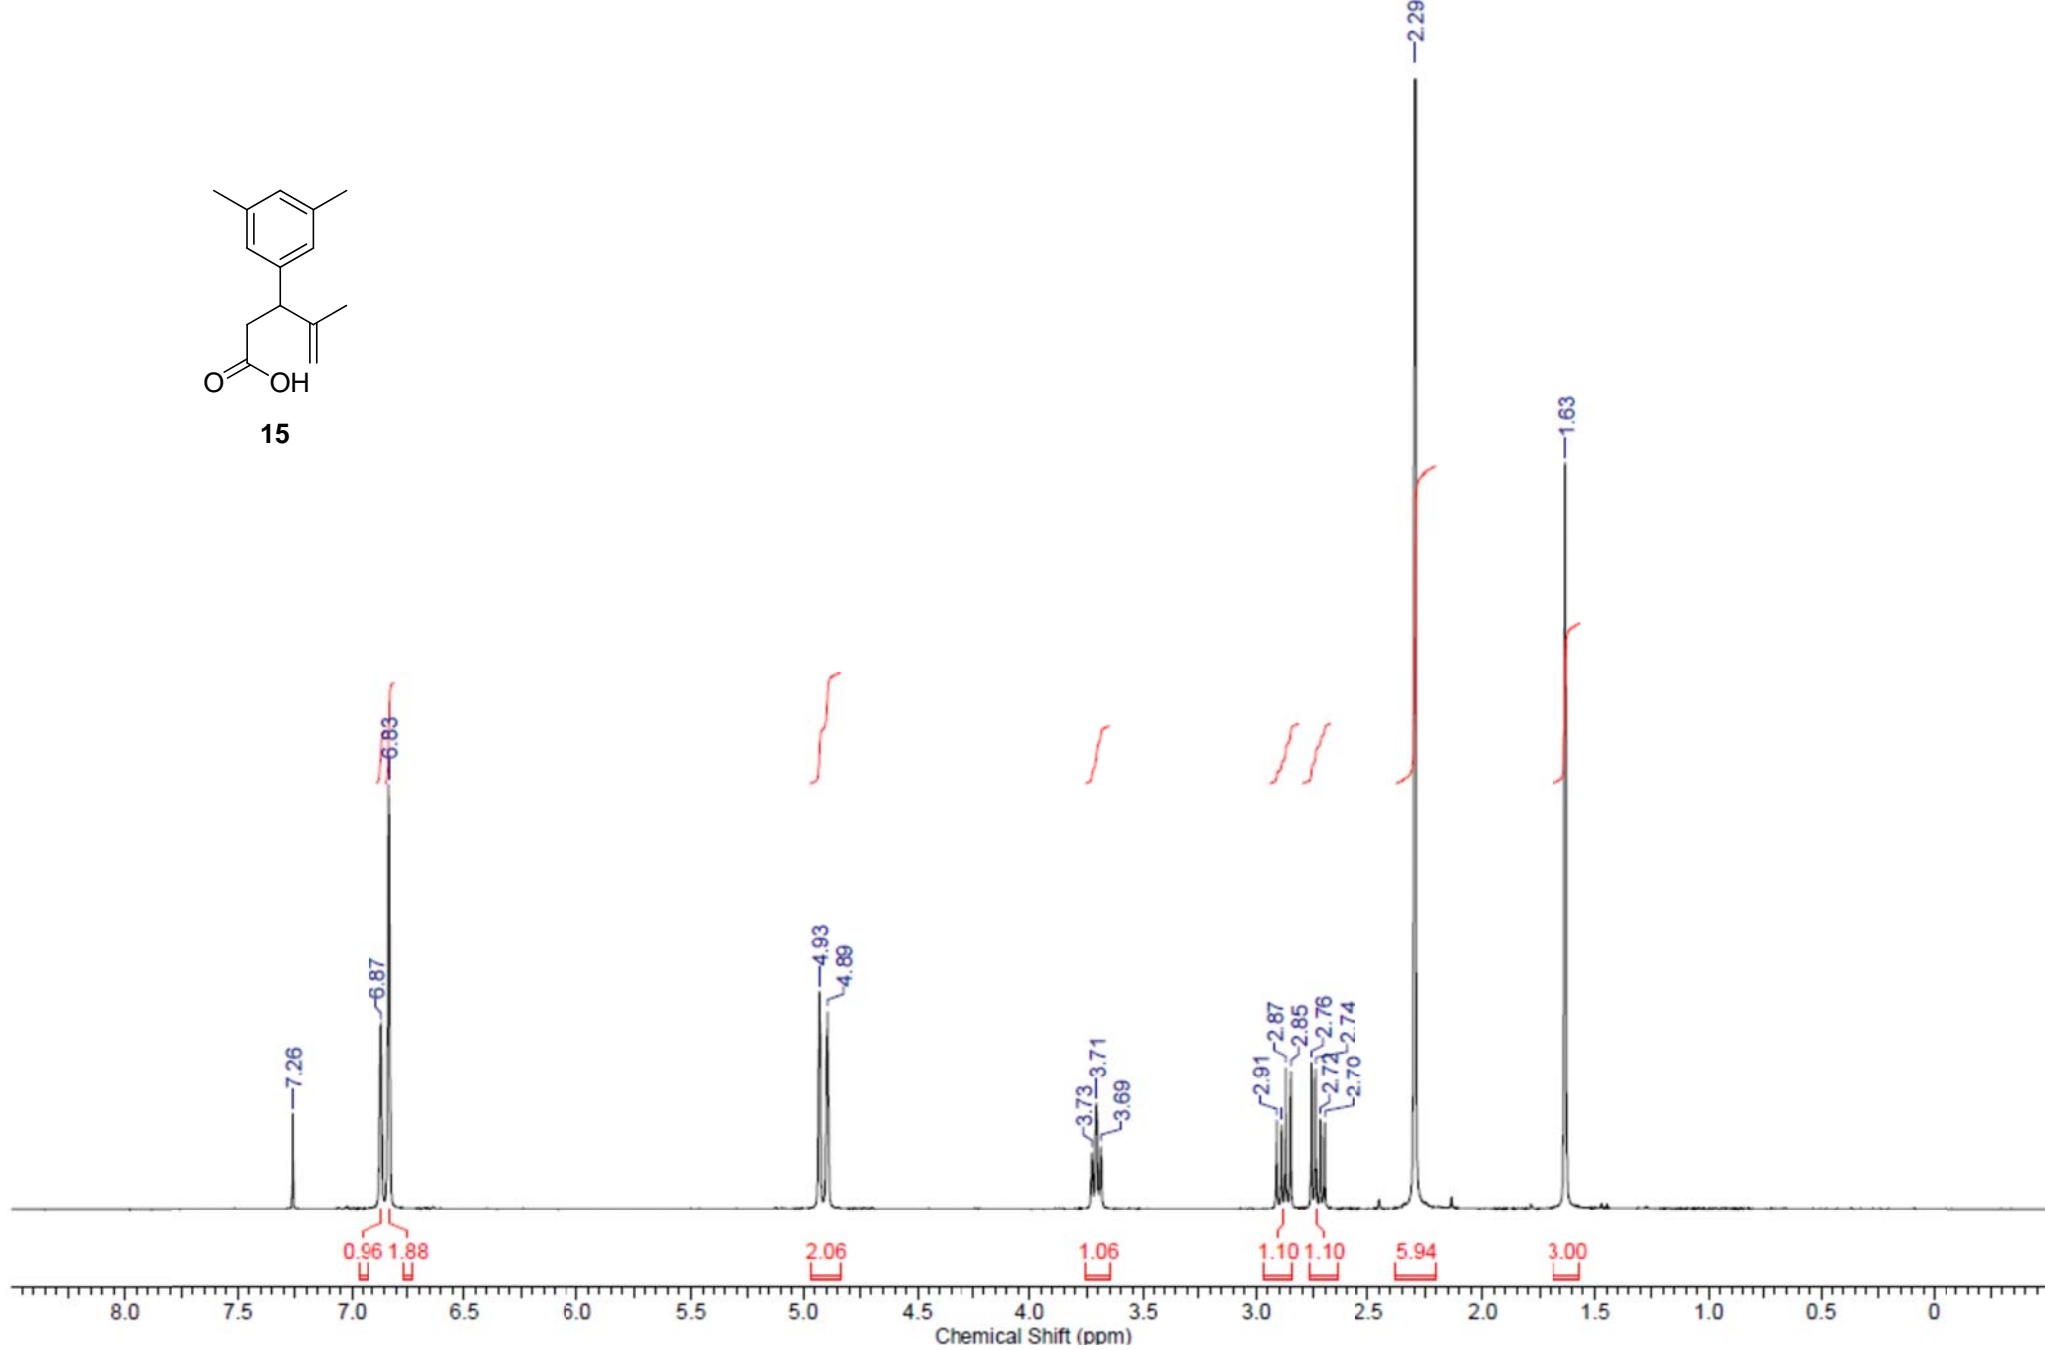

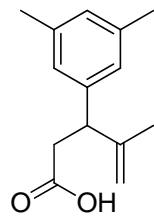

15

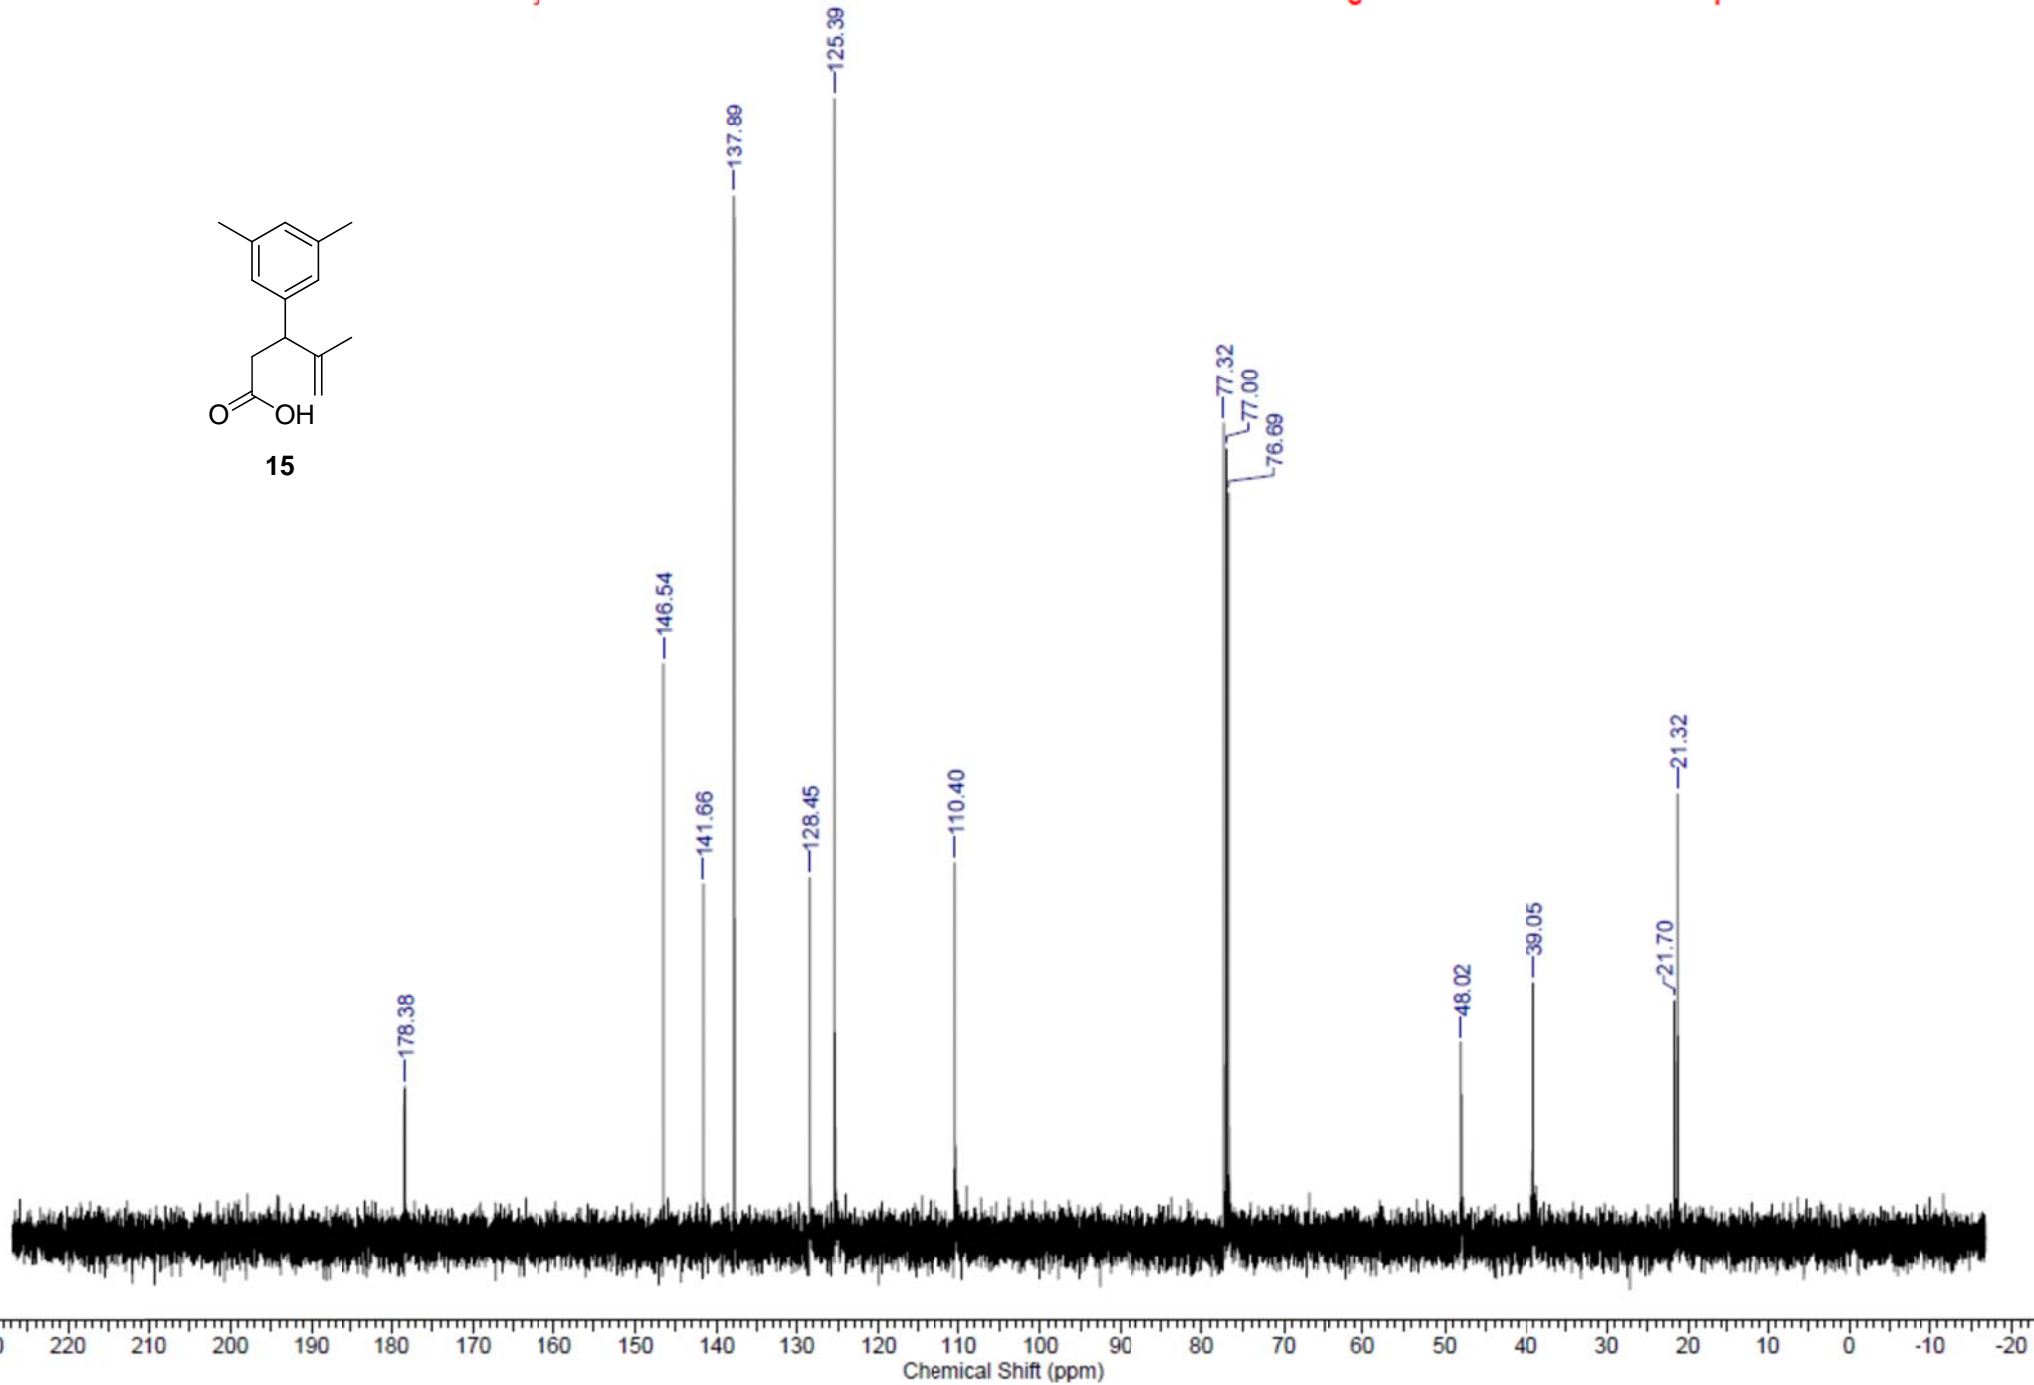

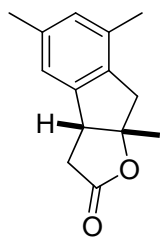

16

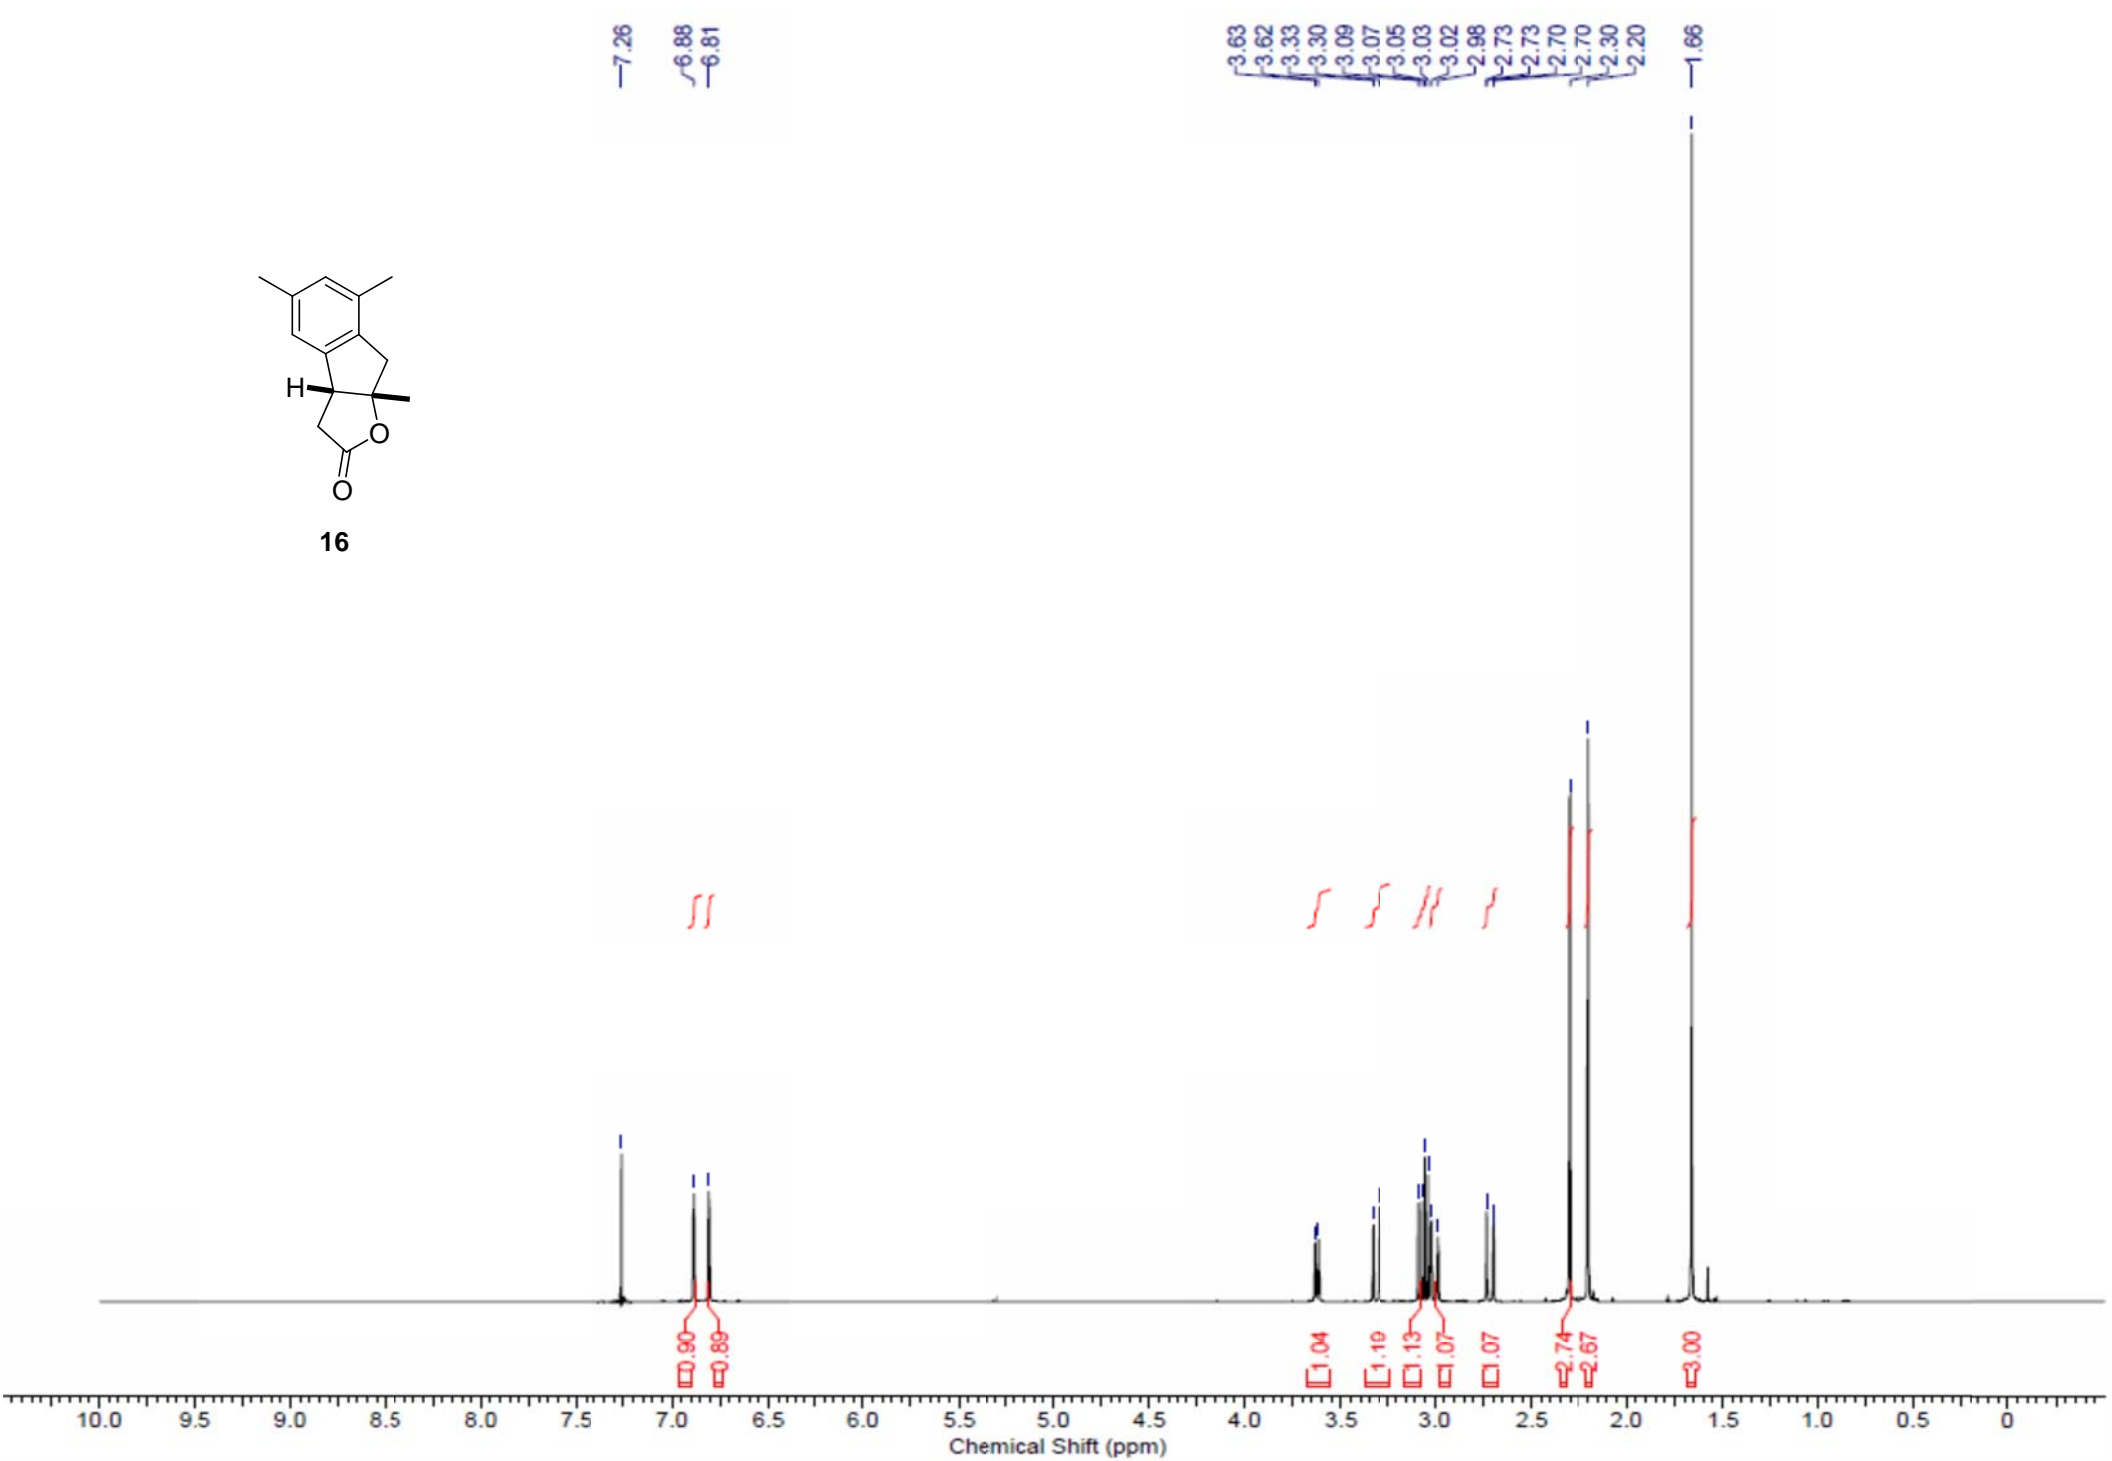

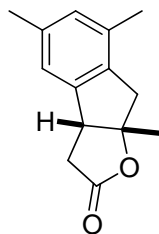

16

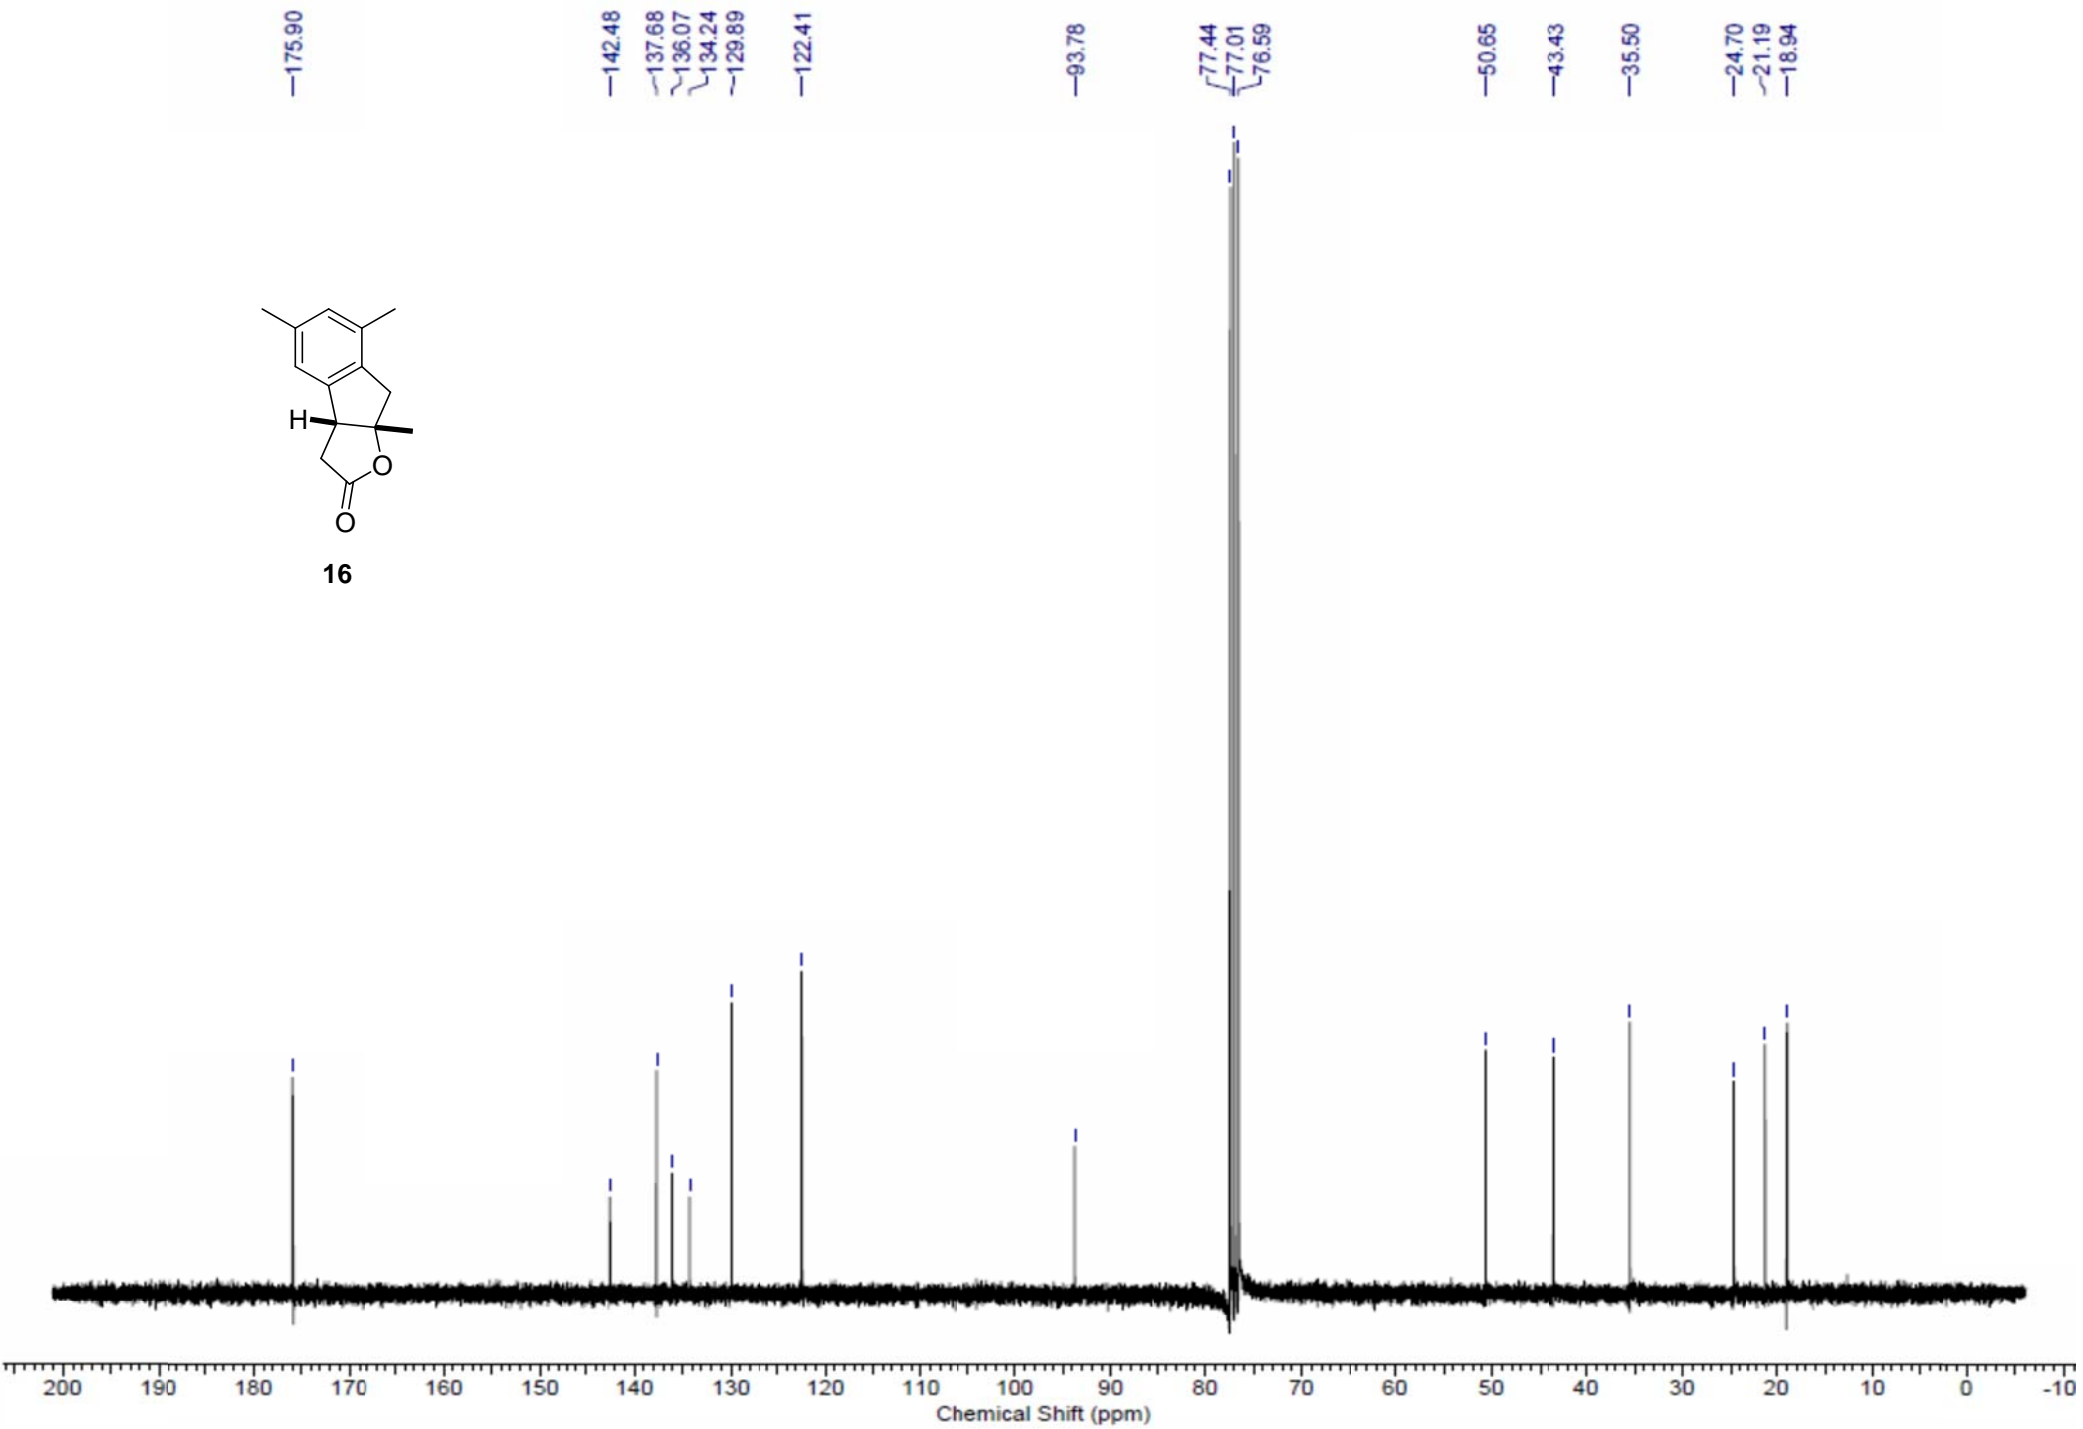

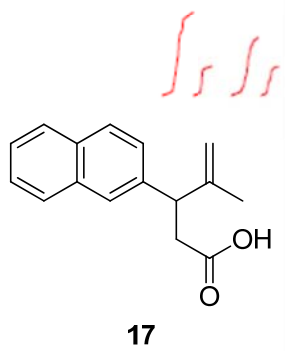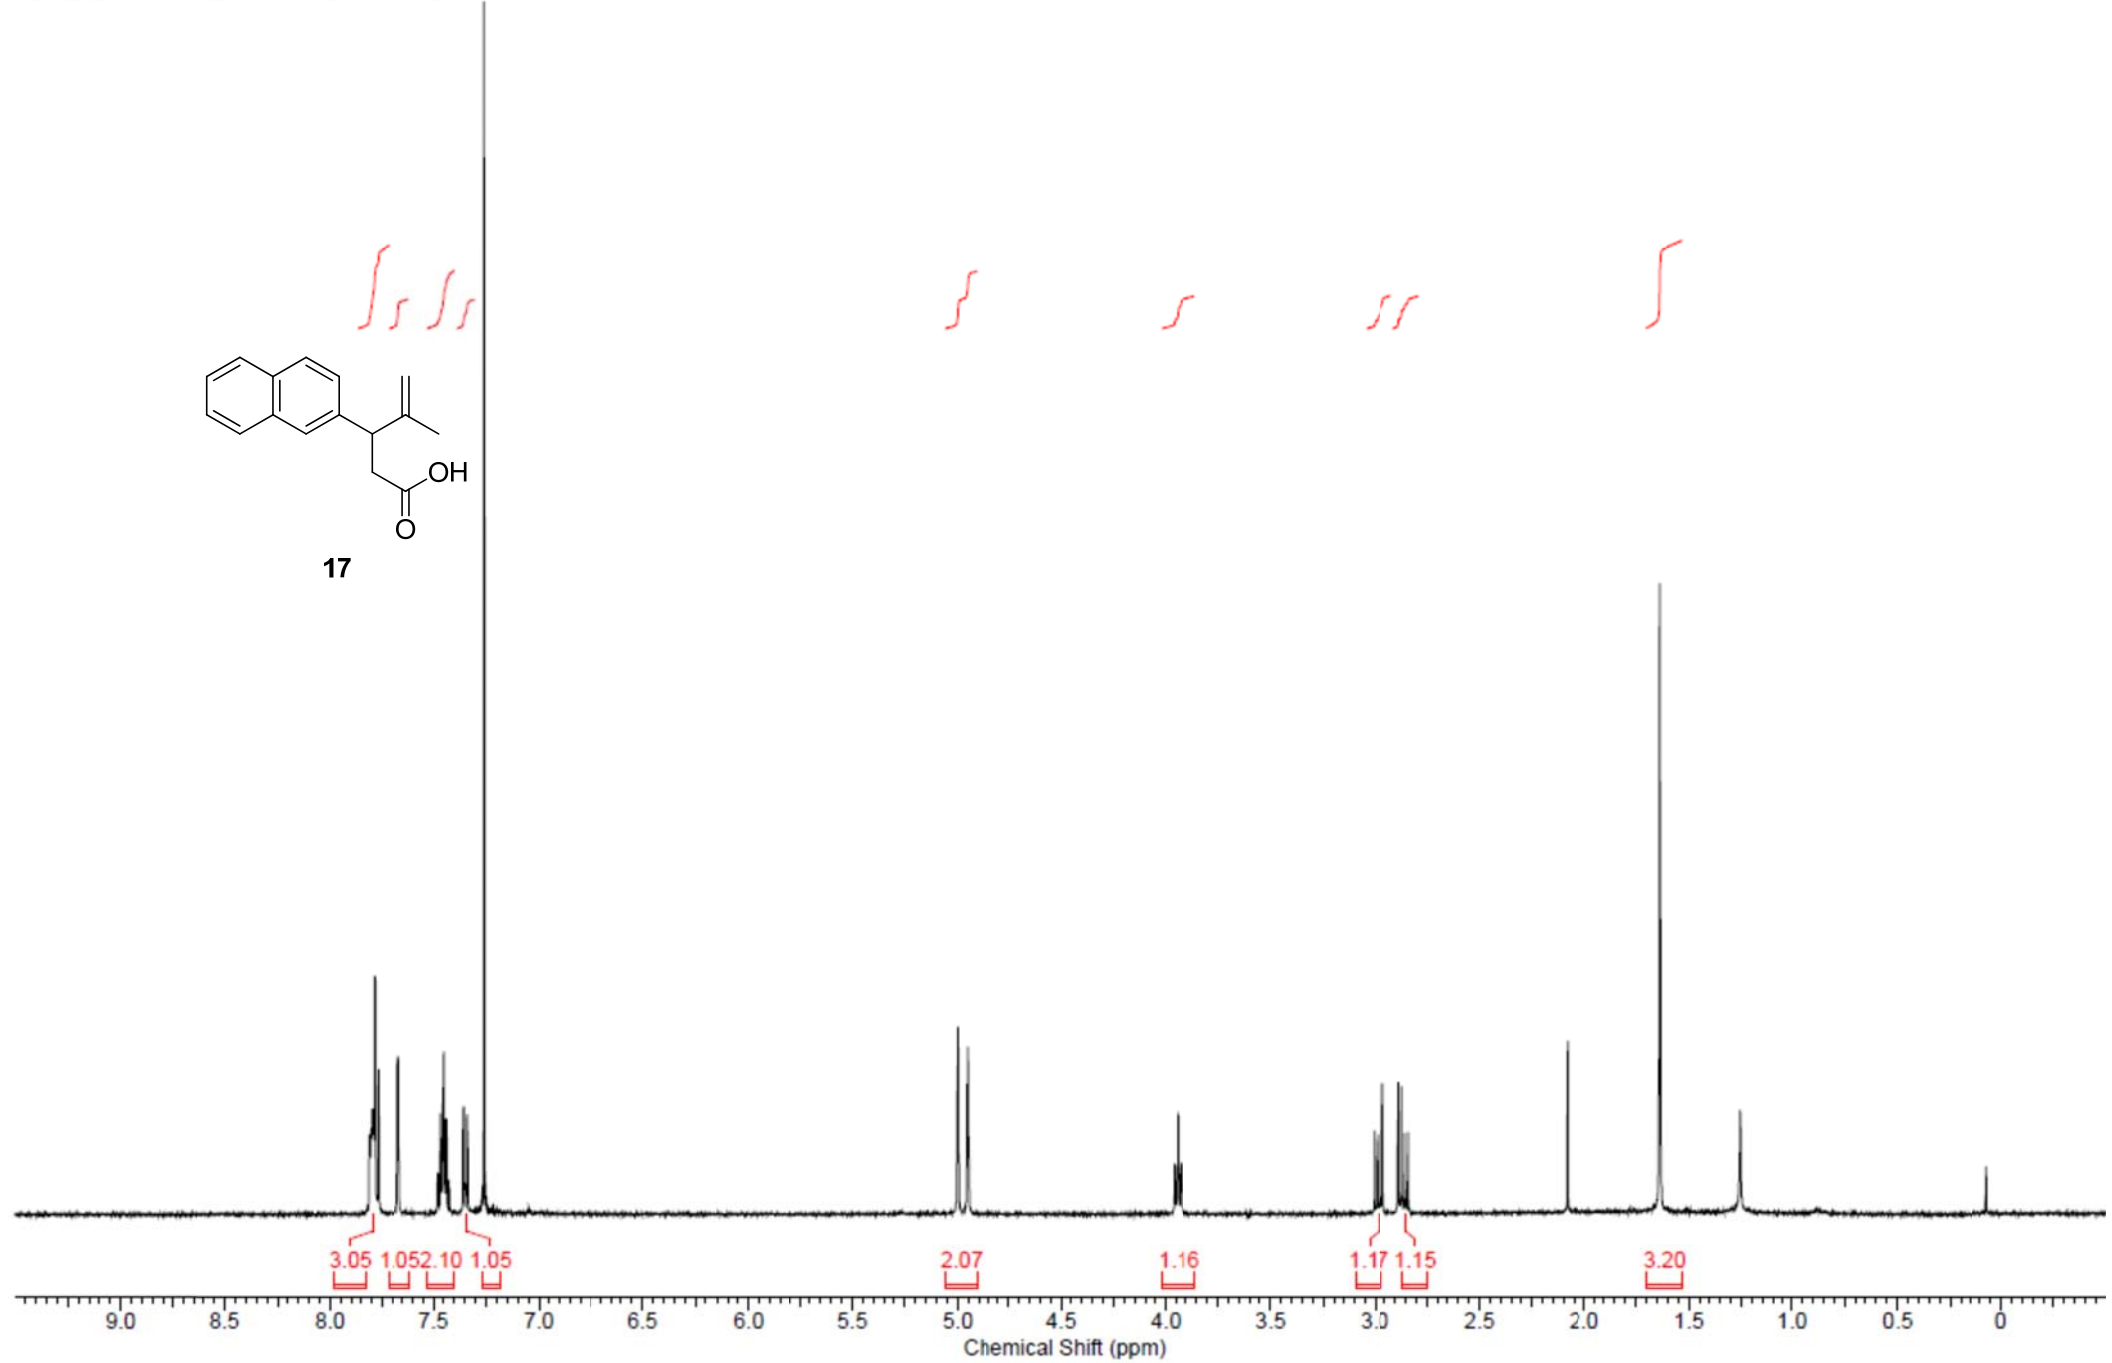

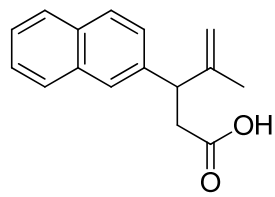

17

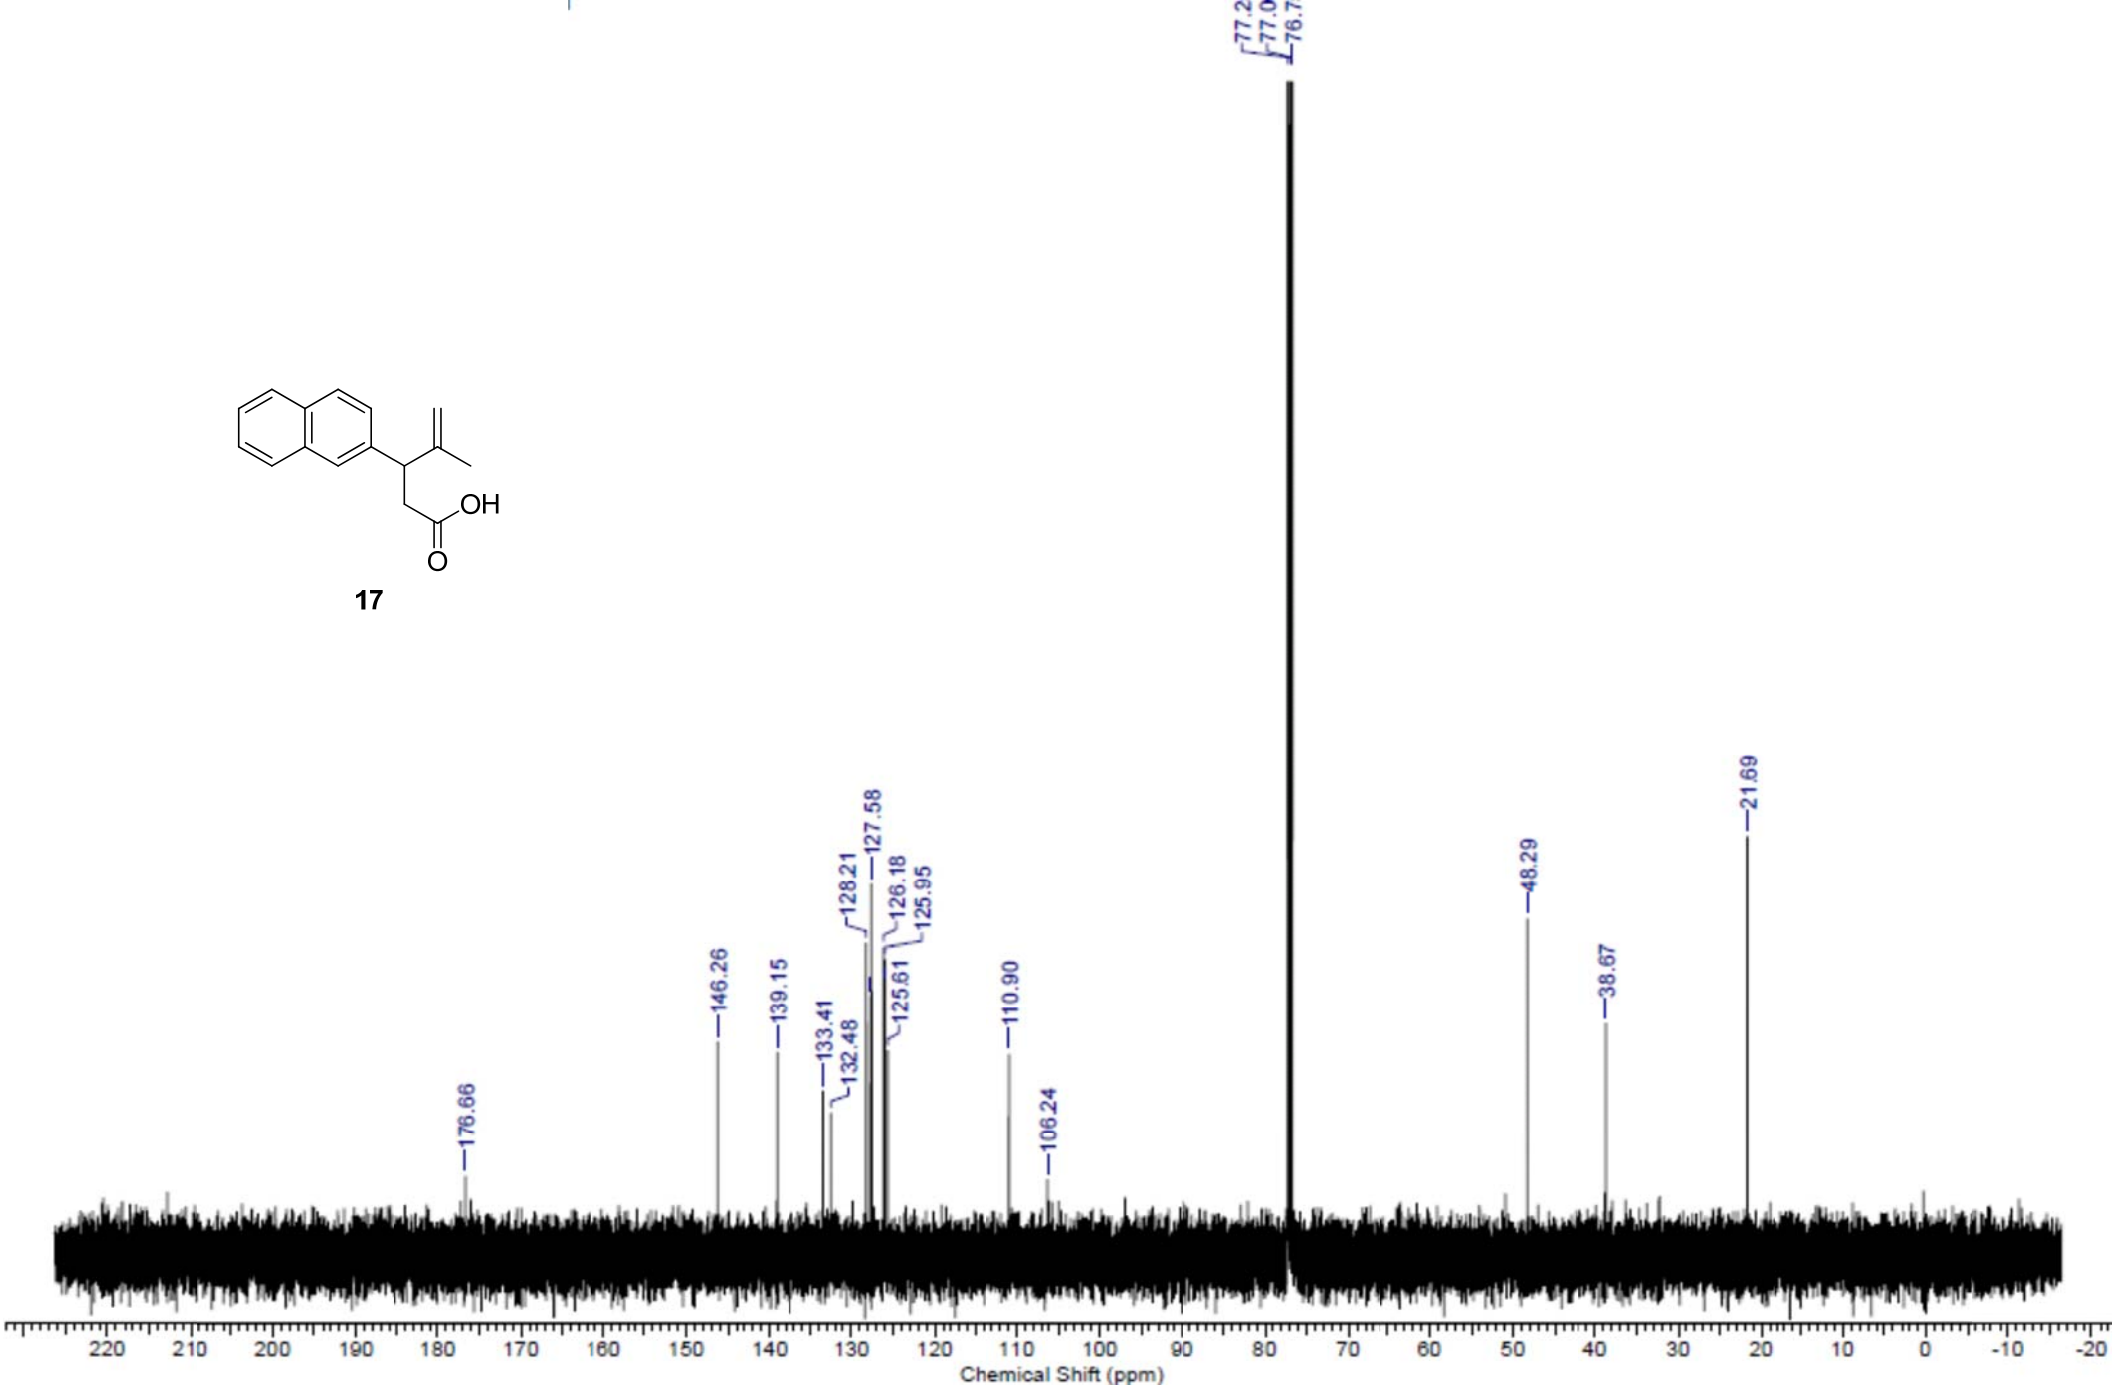



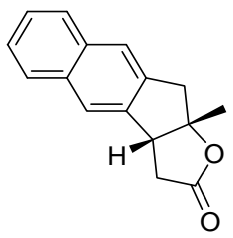

18

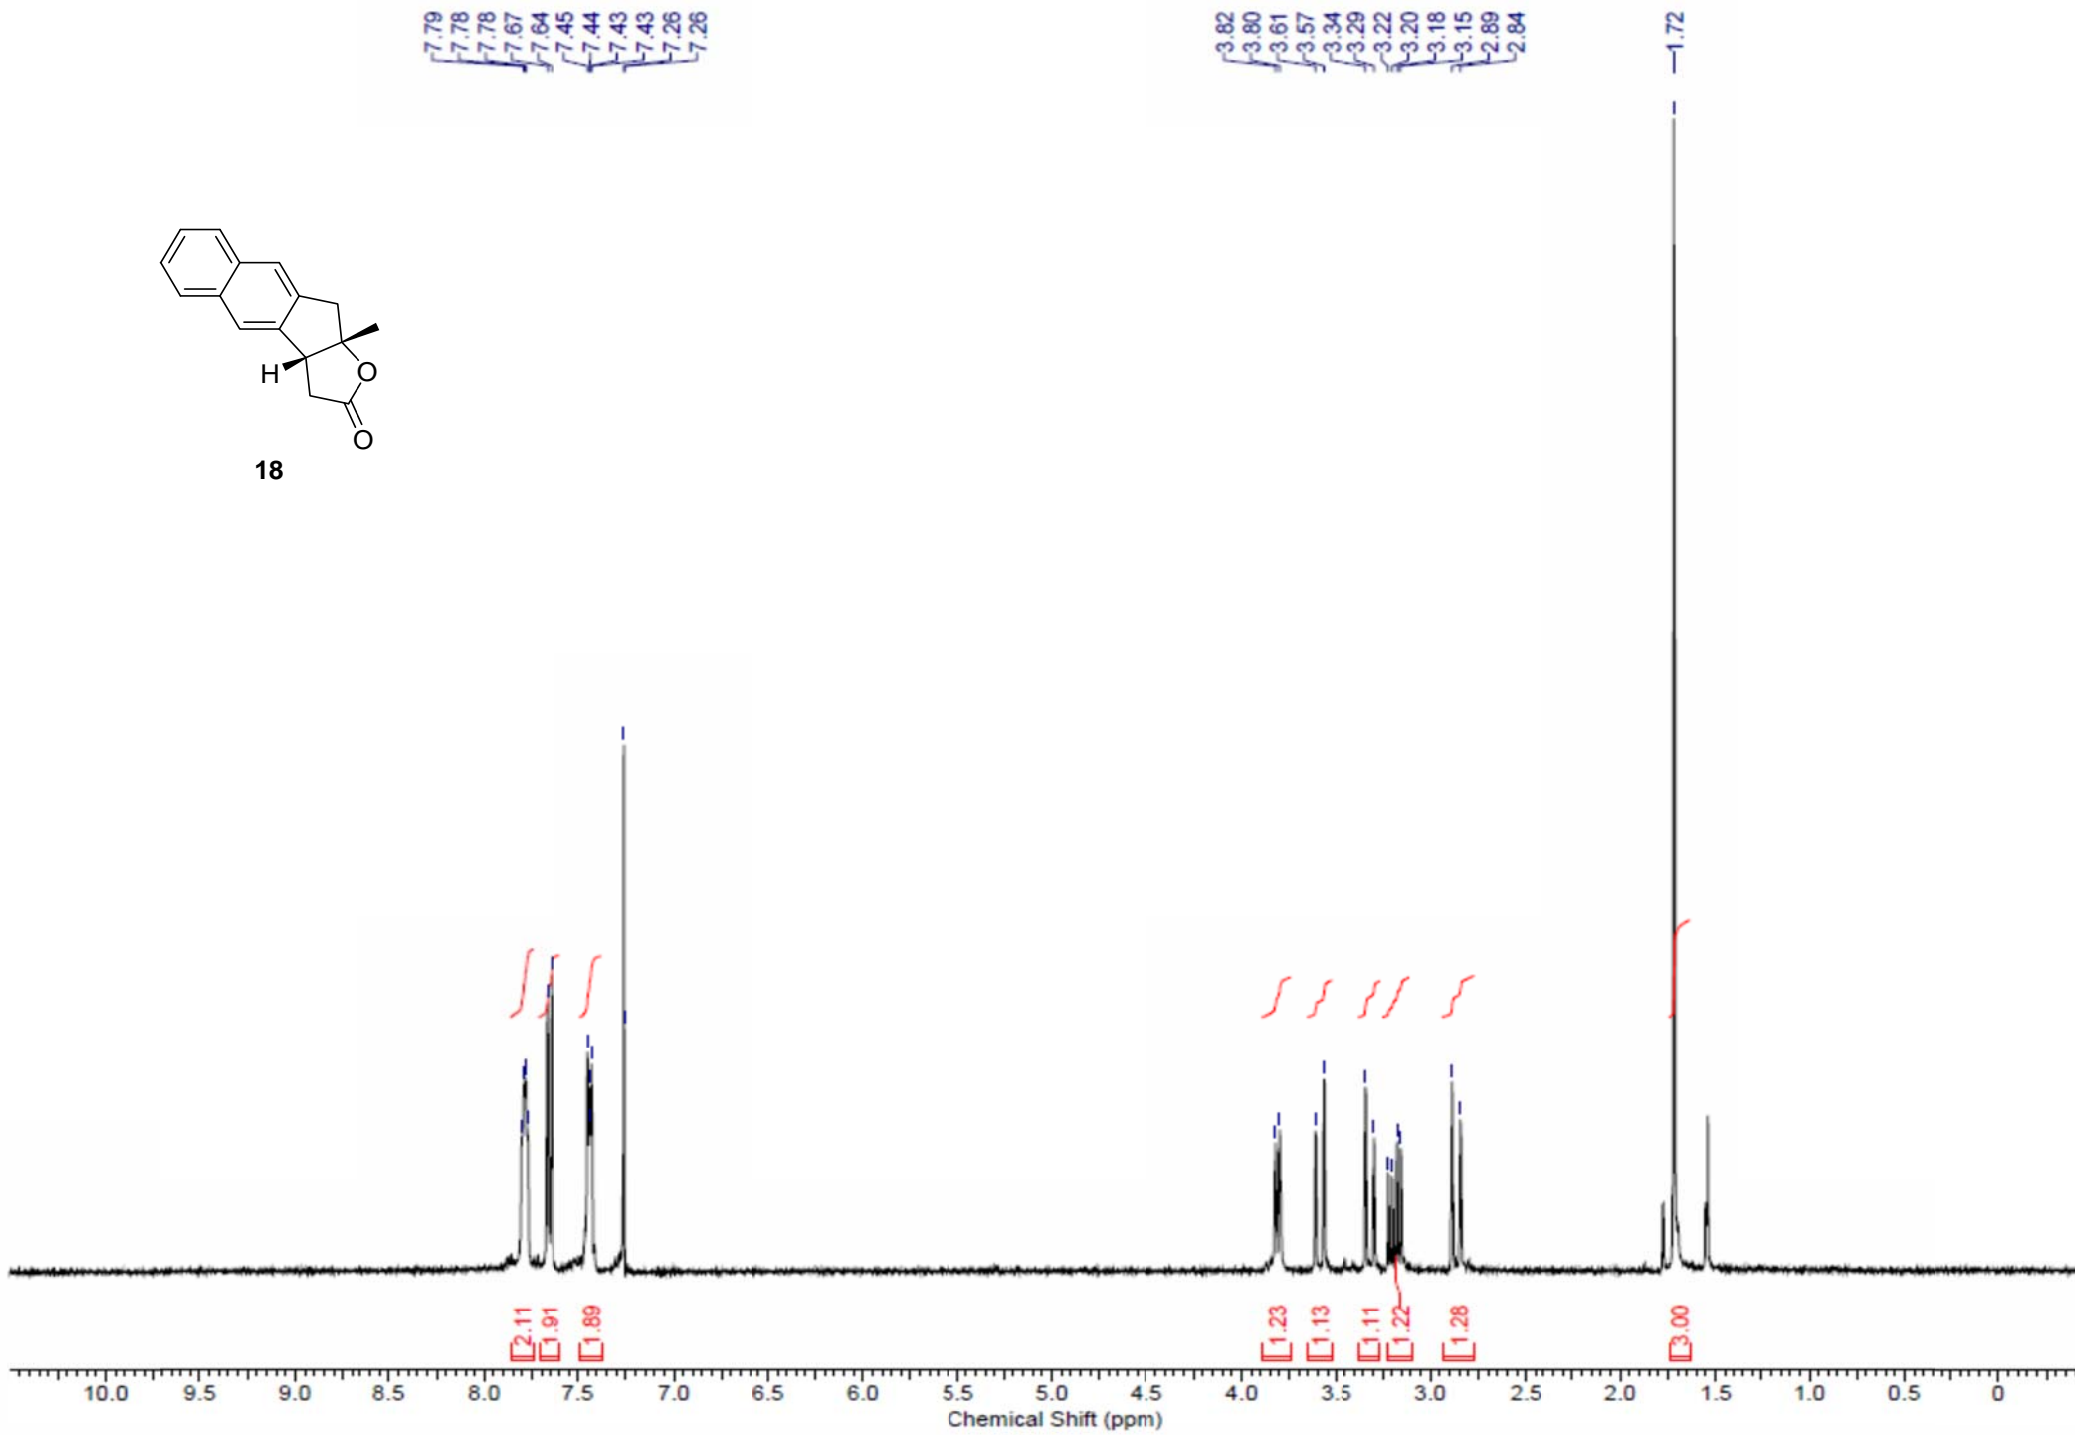

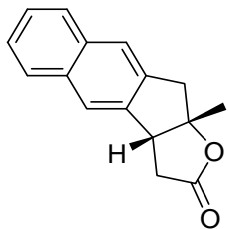

18

175.54

141.88  
138.80  
133.72  
133.23  
127.68  
127.61  
125.91  
125.60  
123.61  
123.45

94.02

77.43  
77.33  
77.00  
76.58  
76.49

50.13

44.28

36.09

24.35

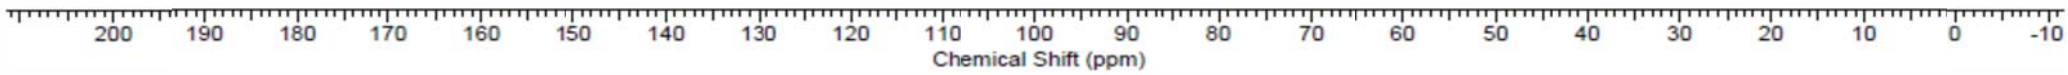

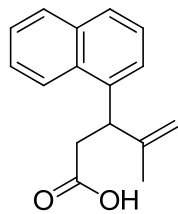

19

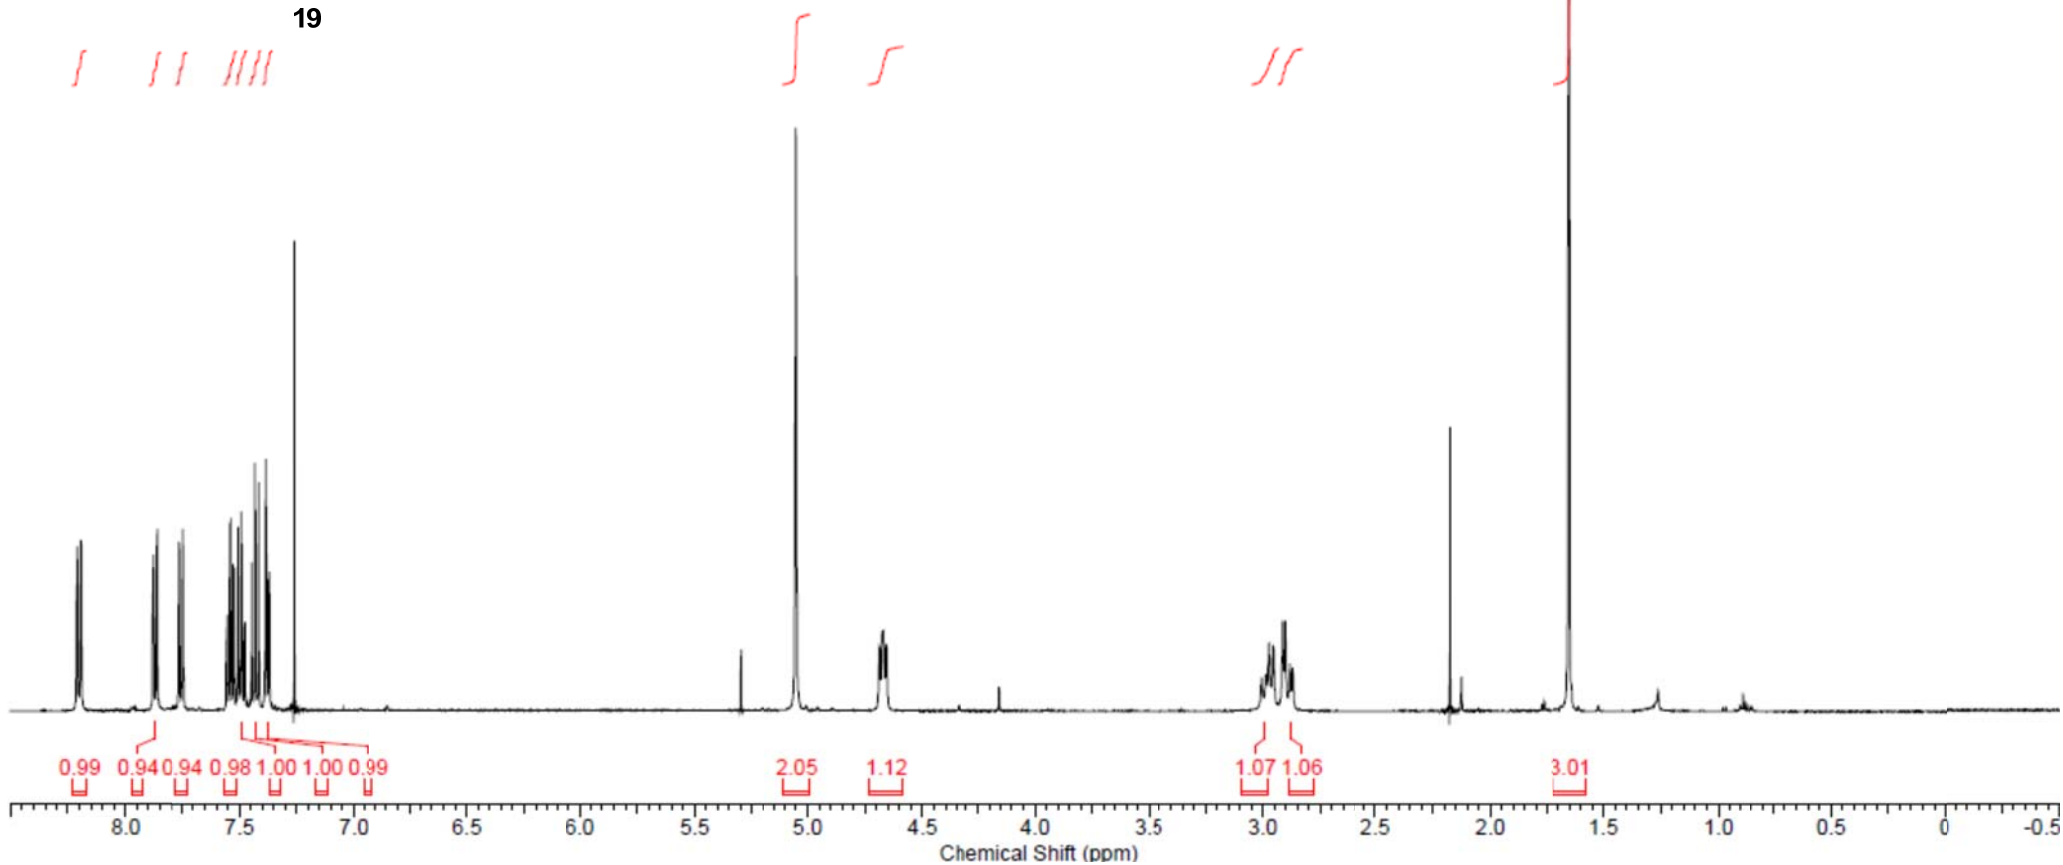

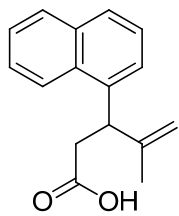

19

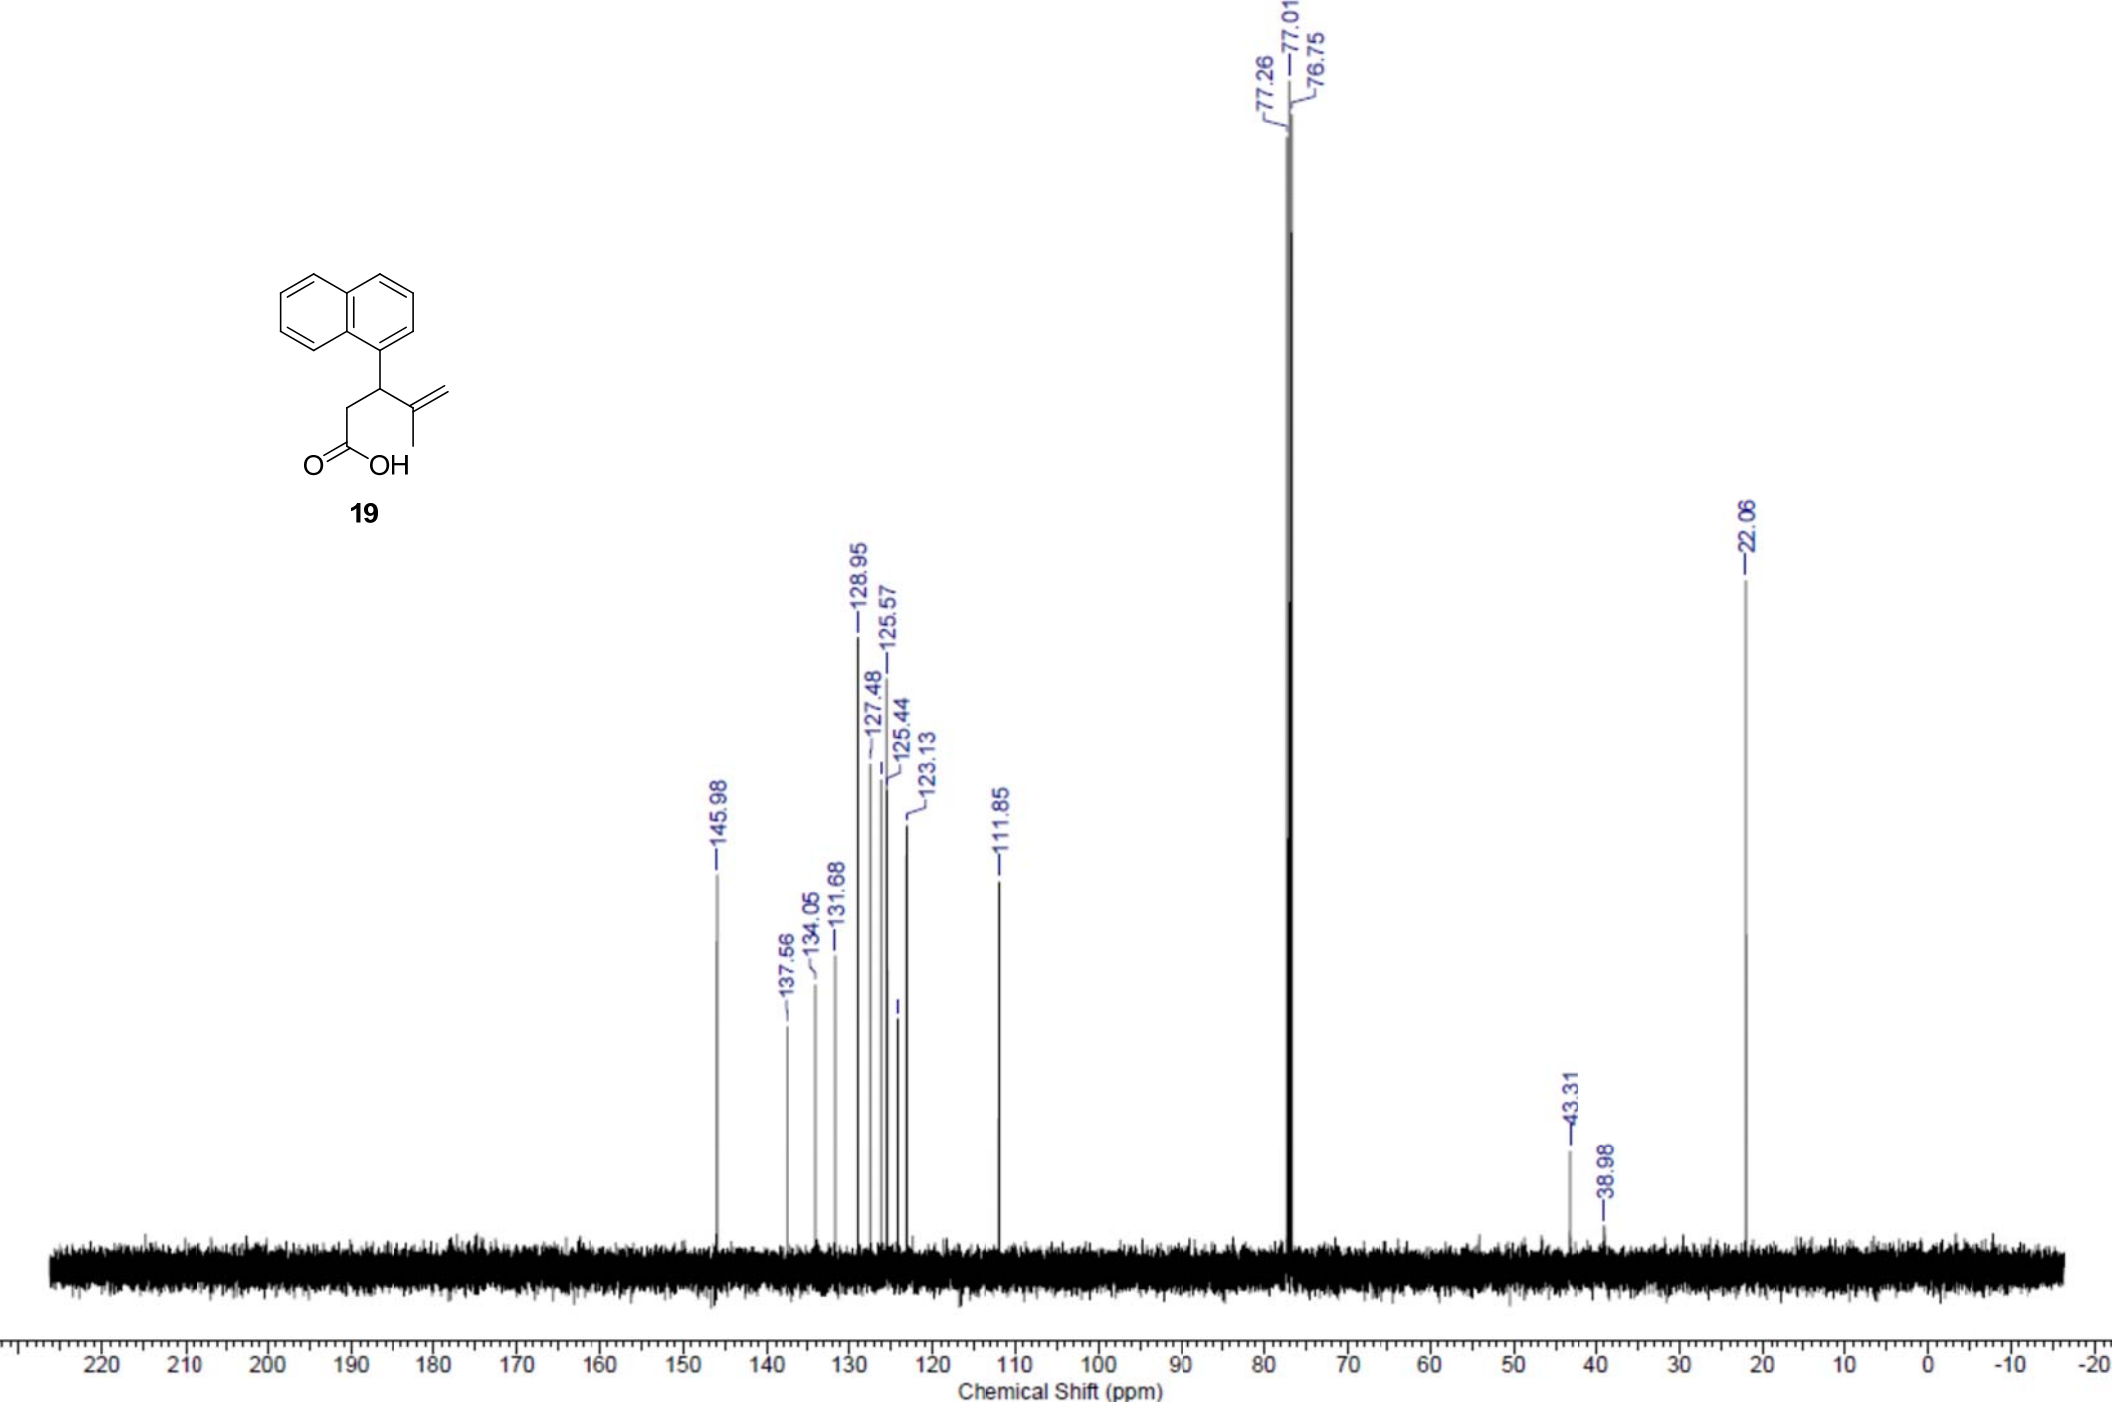

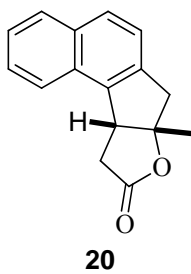

7.91  
7.89  
7.79  
7.77  
7.67  
7.65  
7.55  
7.51  
7.49  
7.34  
7.32  
7.26

4.10  
4.10  
4.08  
3.63  
3.59  
3.34  
3.31  
3.29  
3.28  
3.26  
2.96  
2.96  
2.93  
2.92

1.75

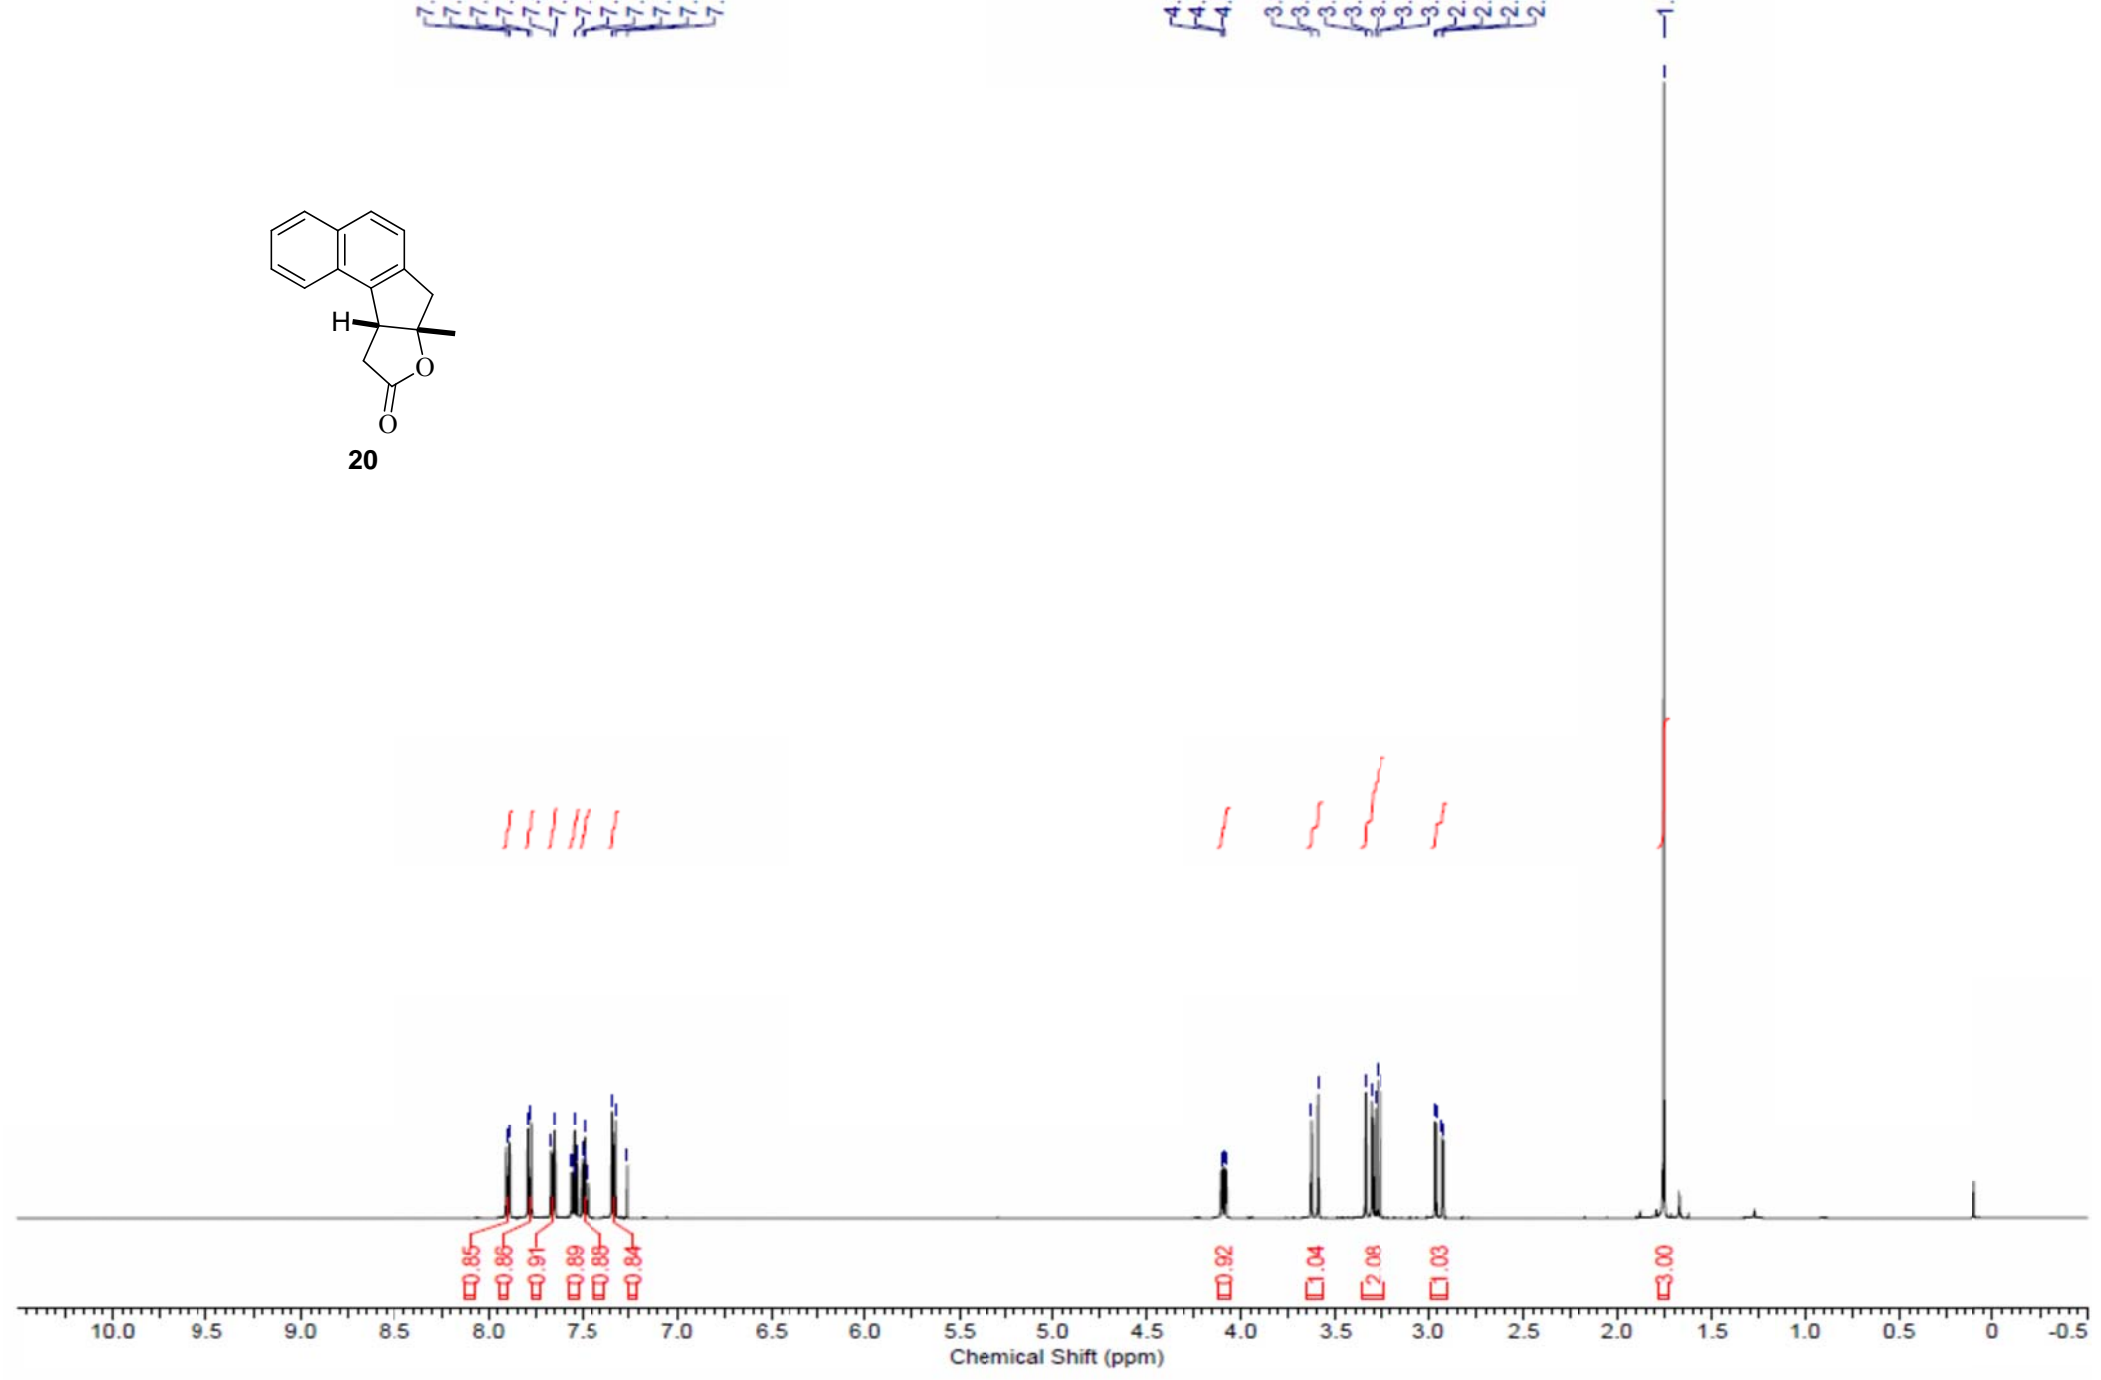

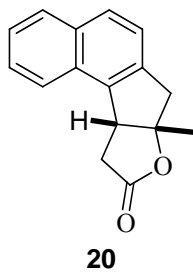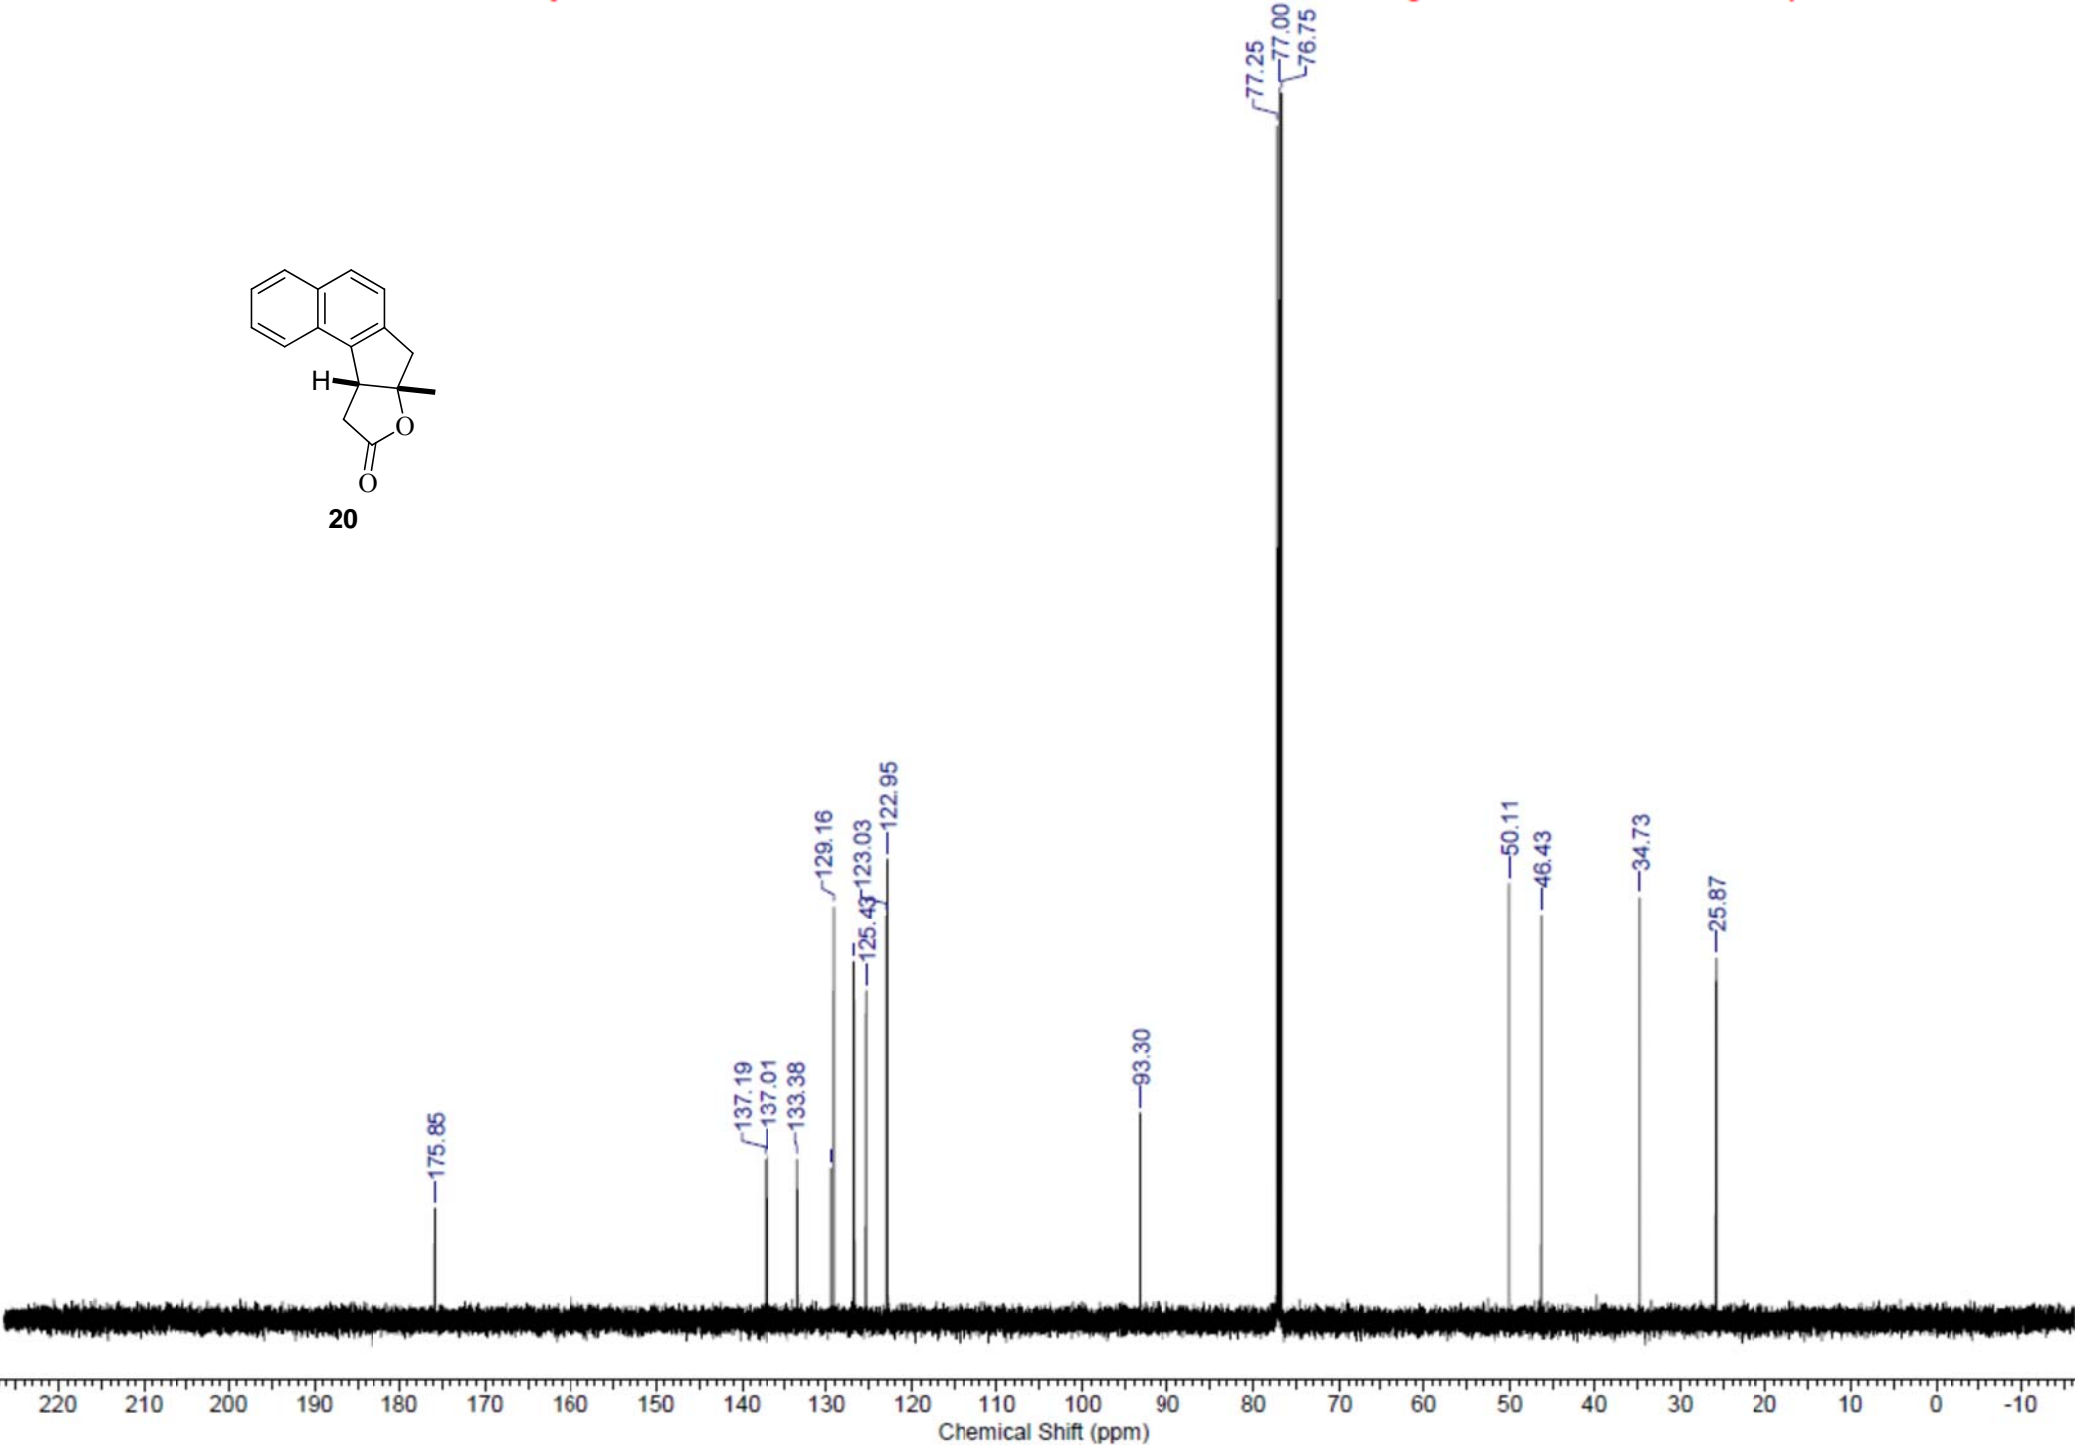

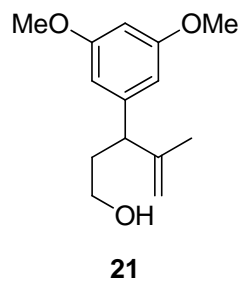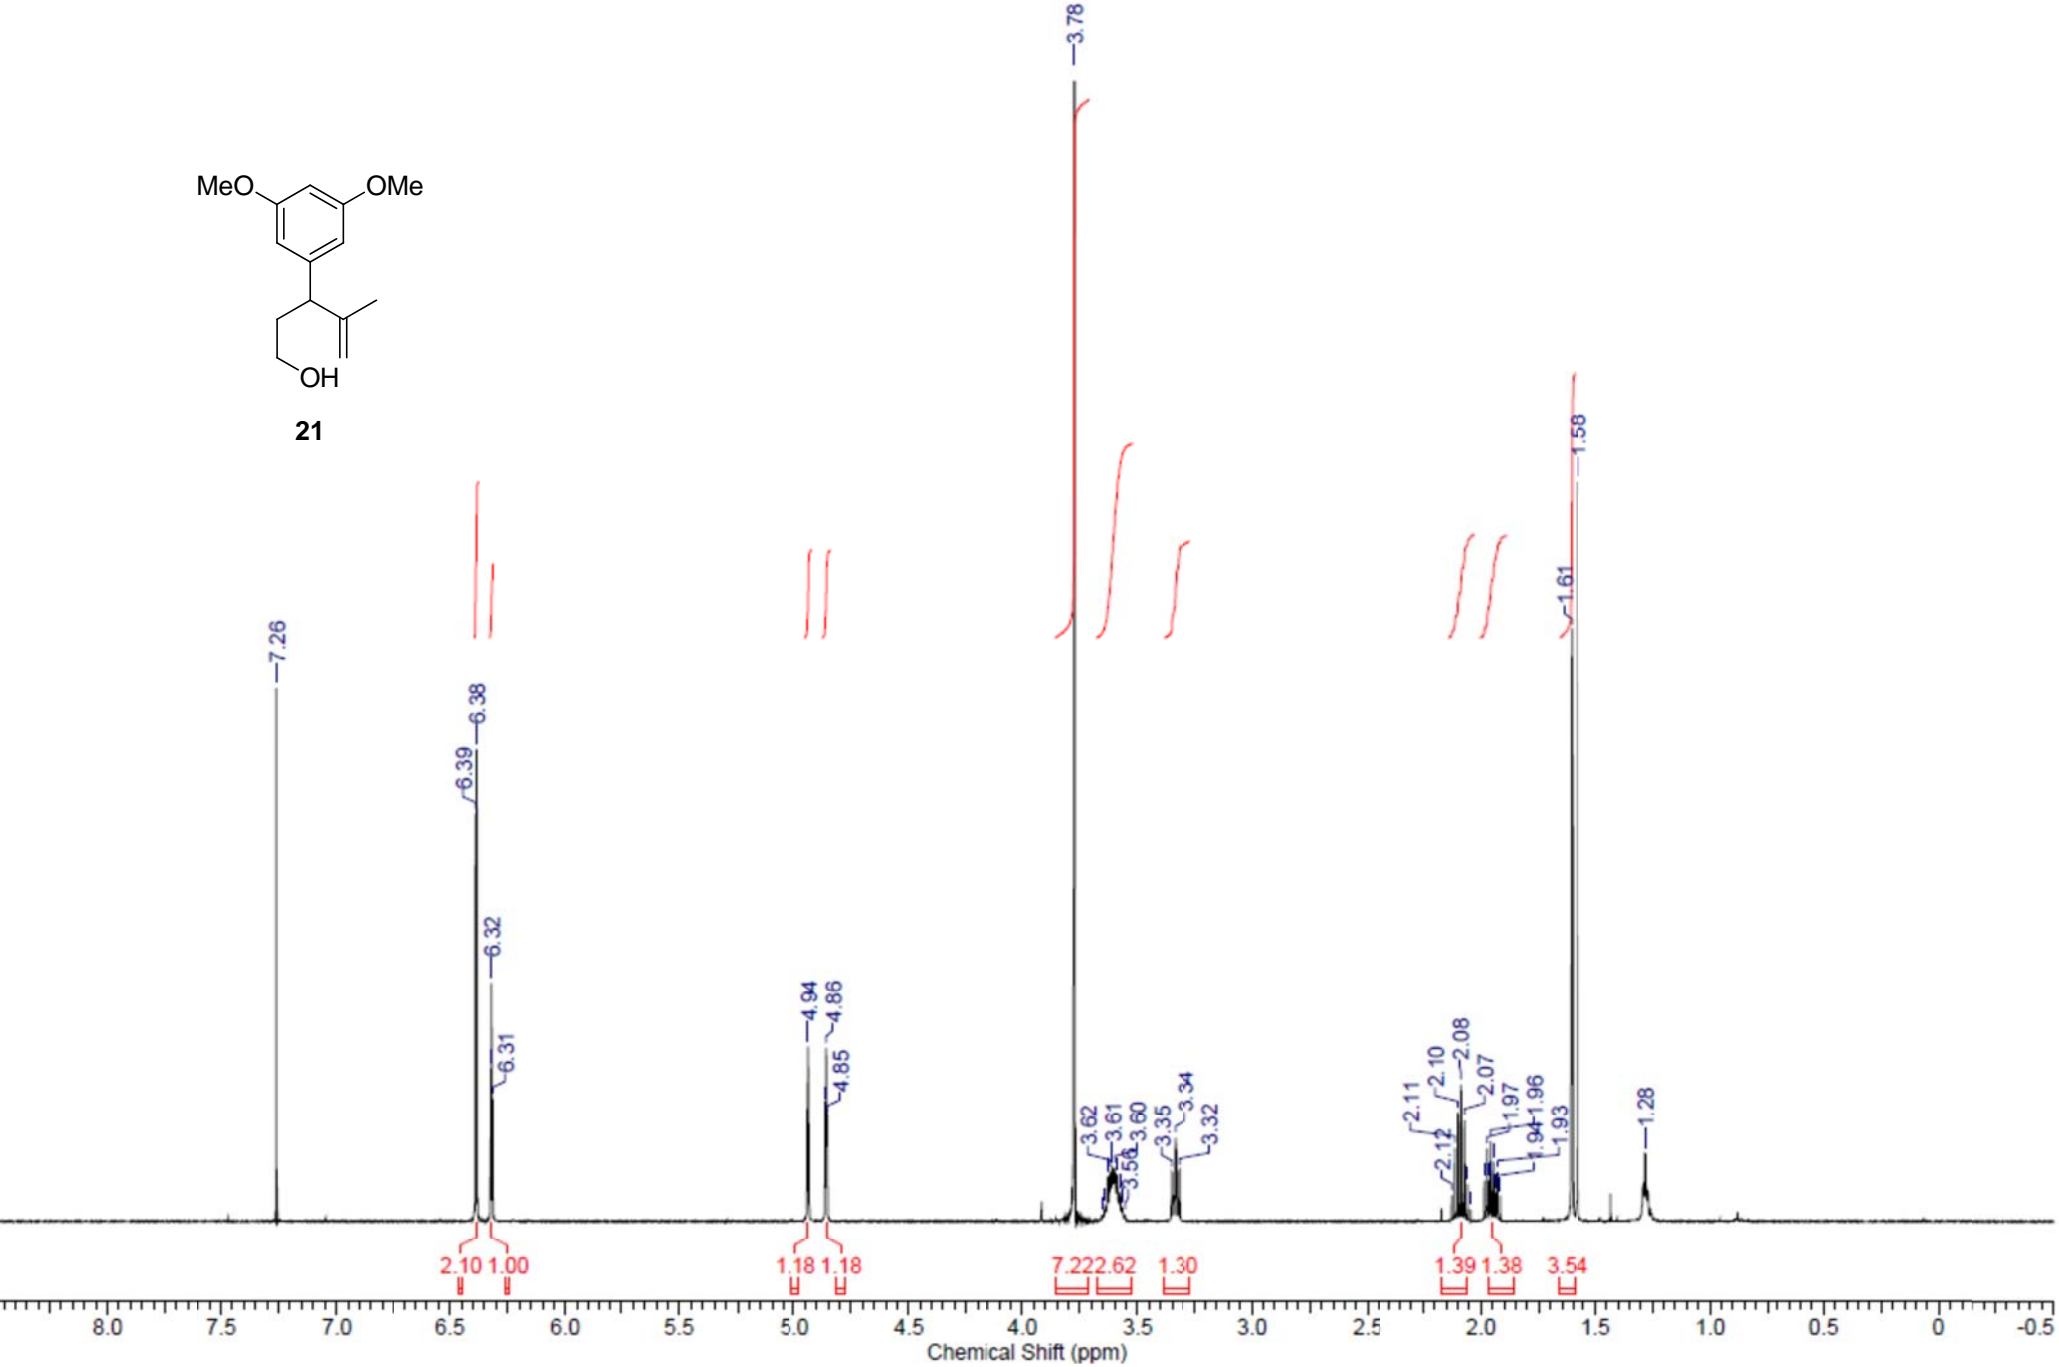

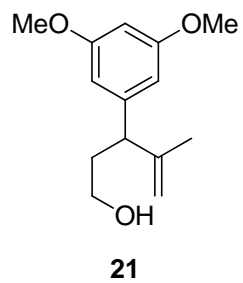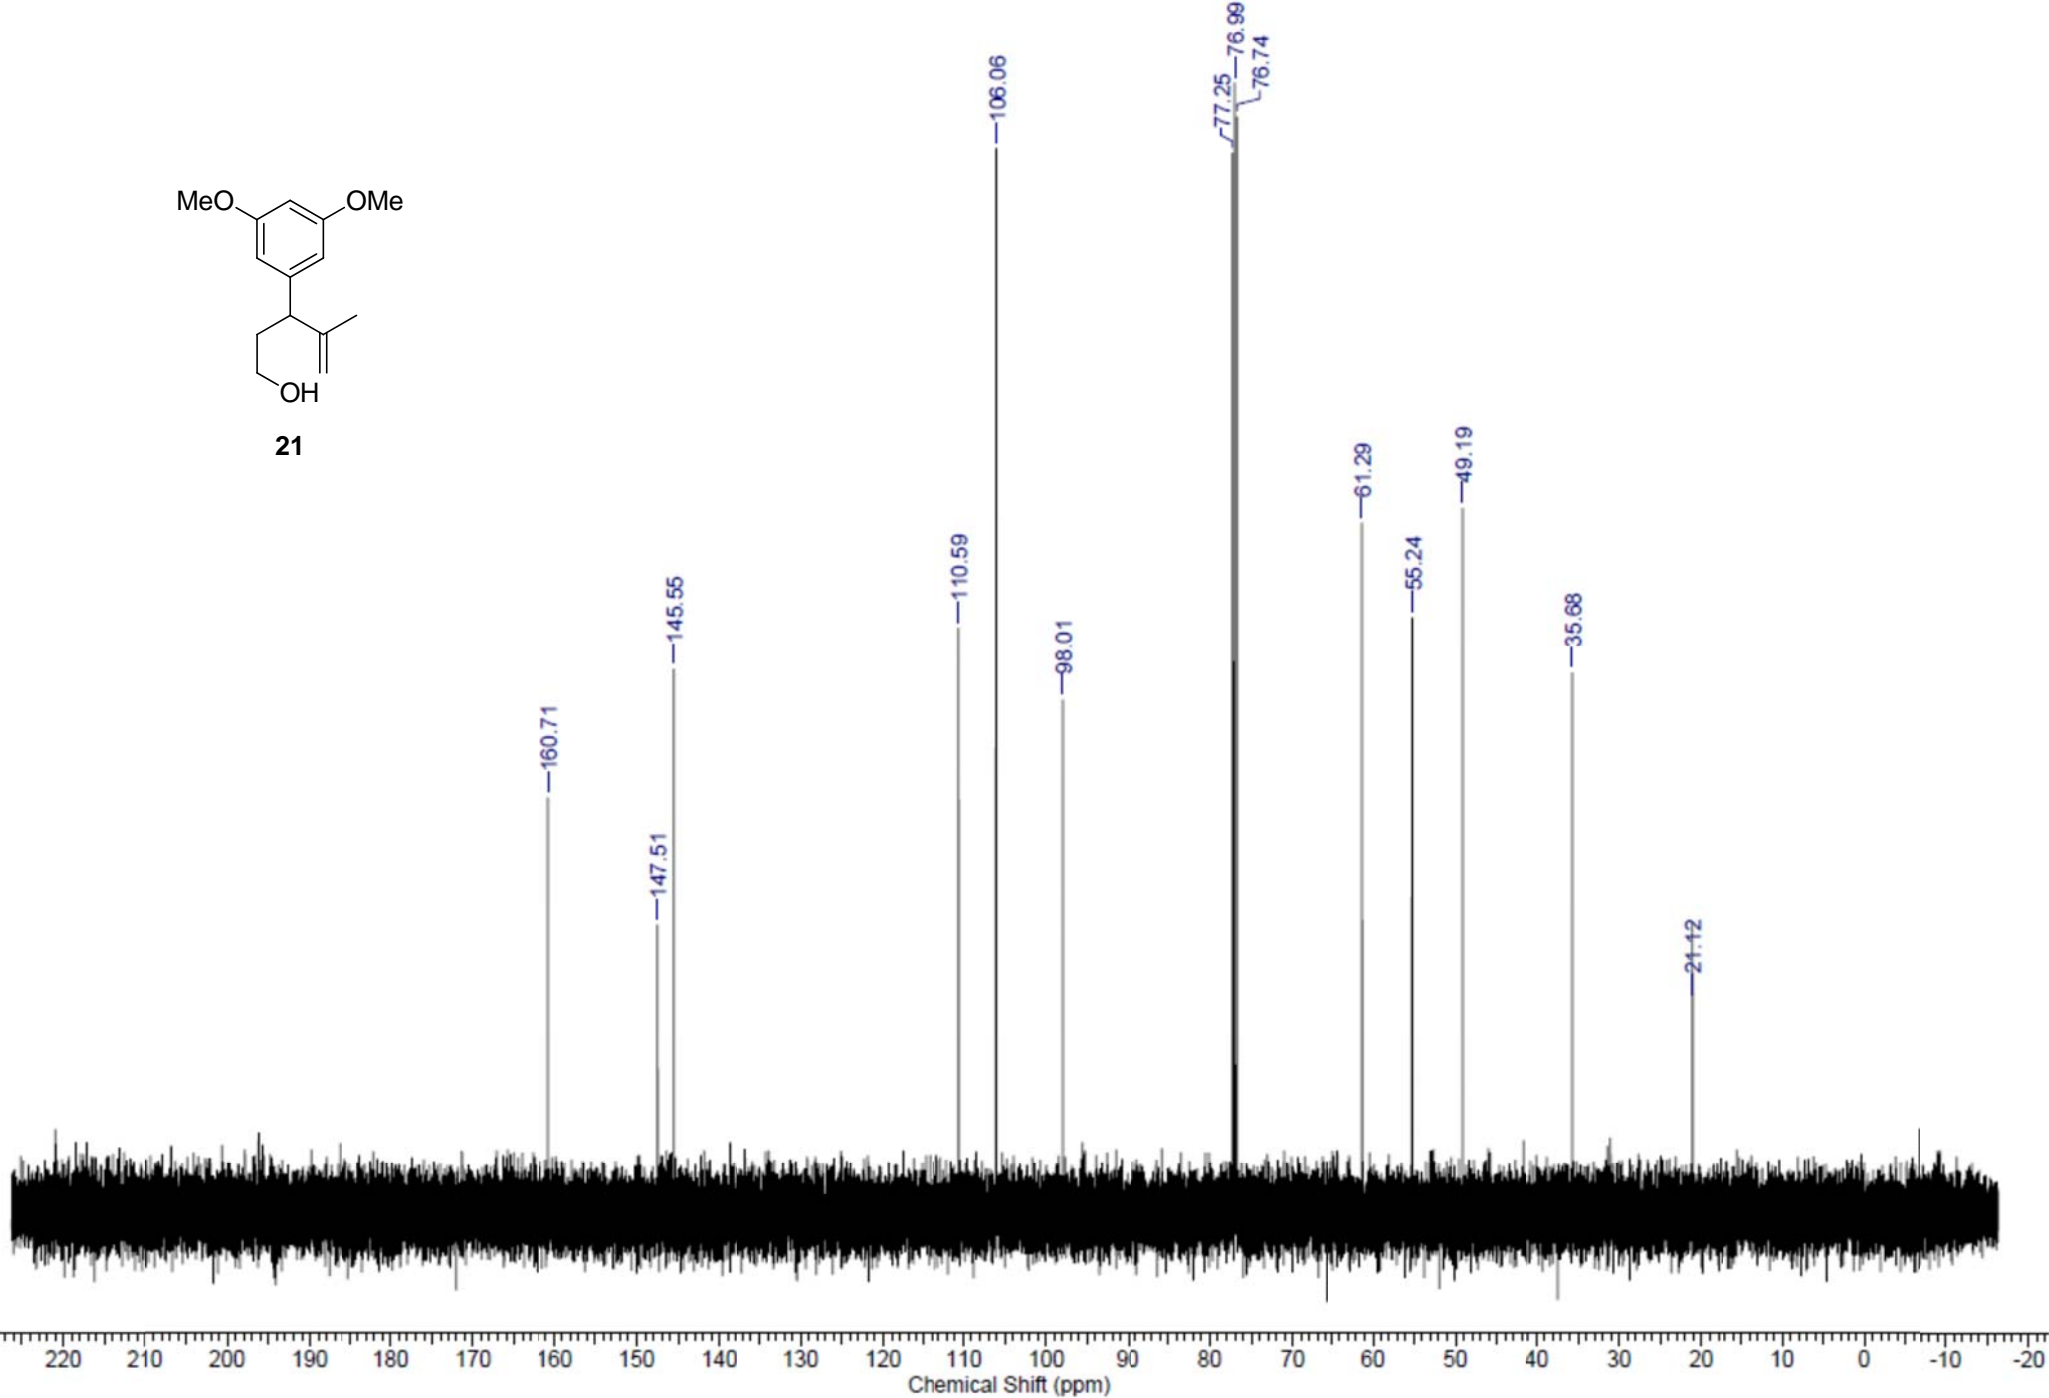



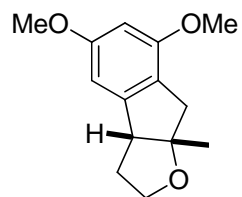

22

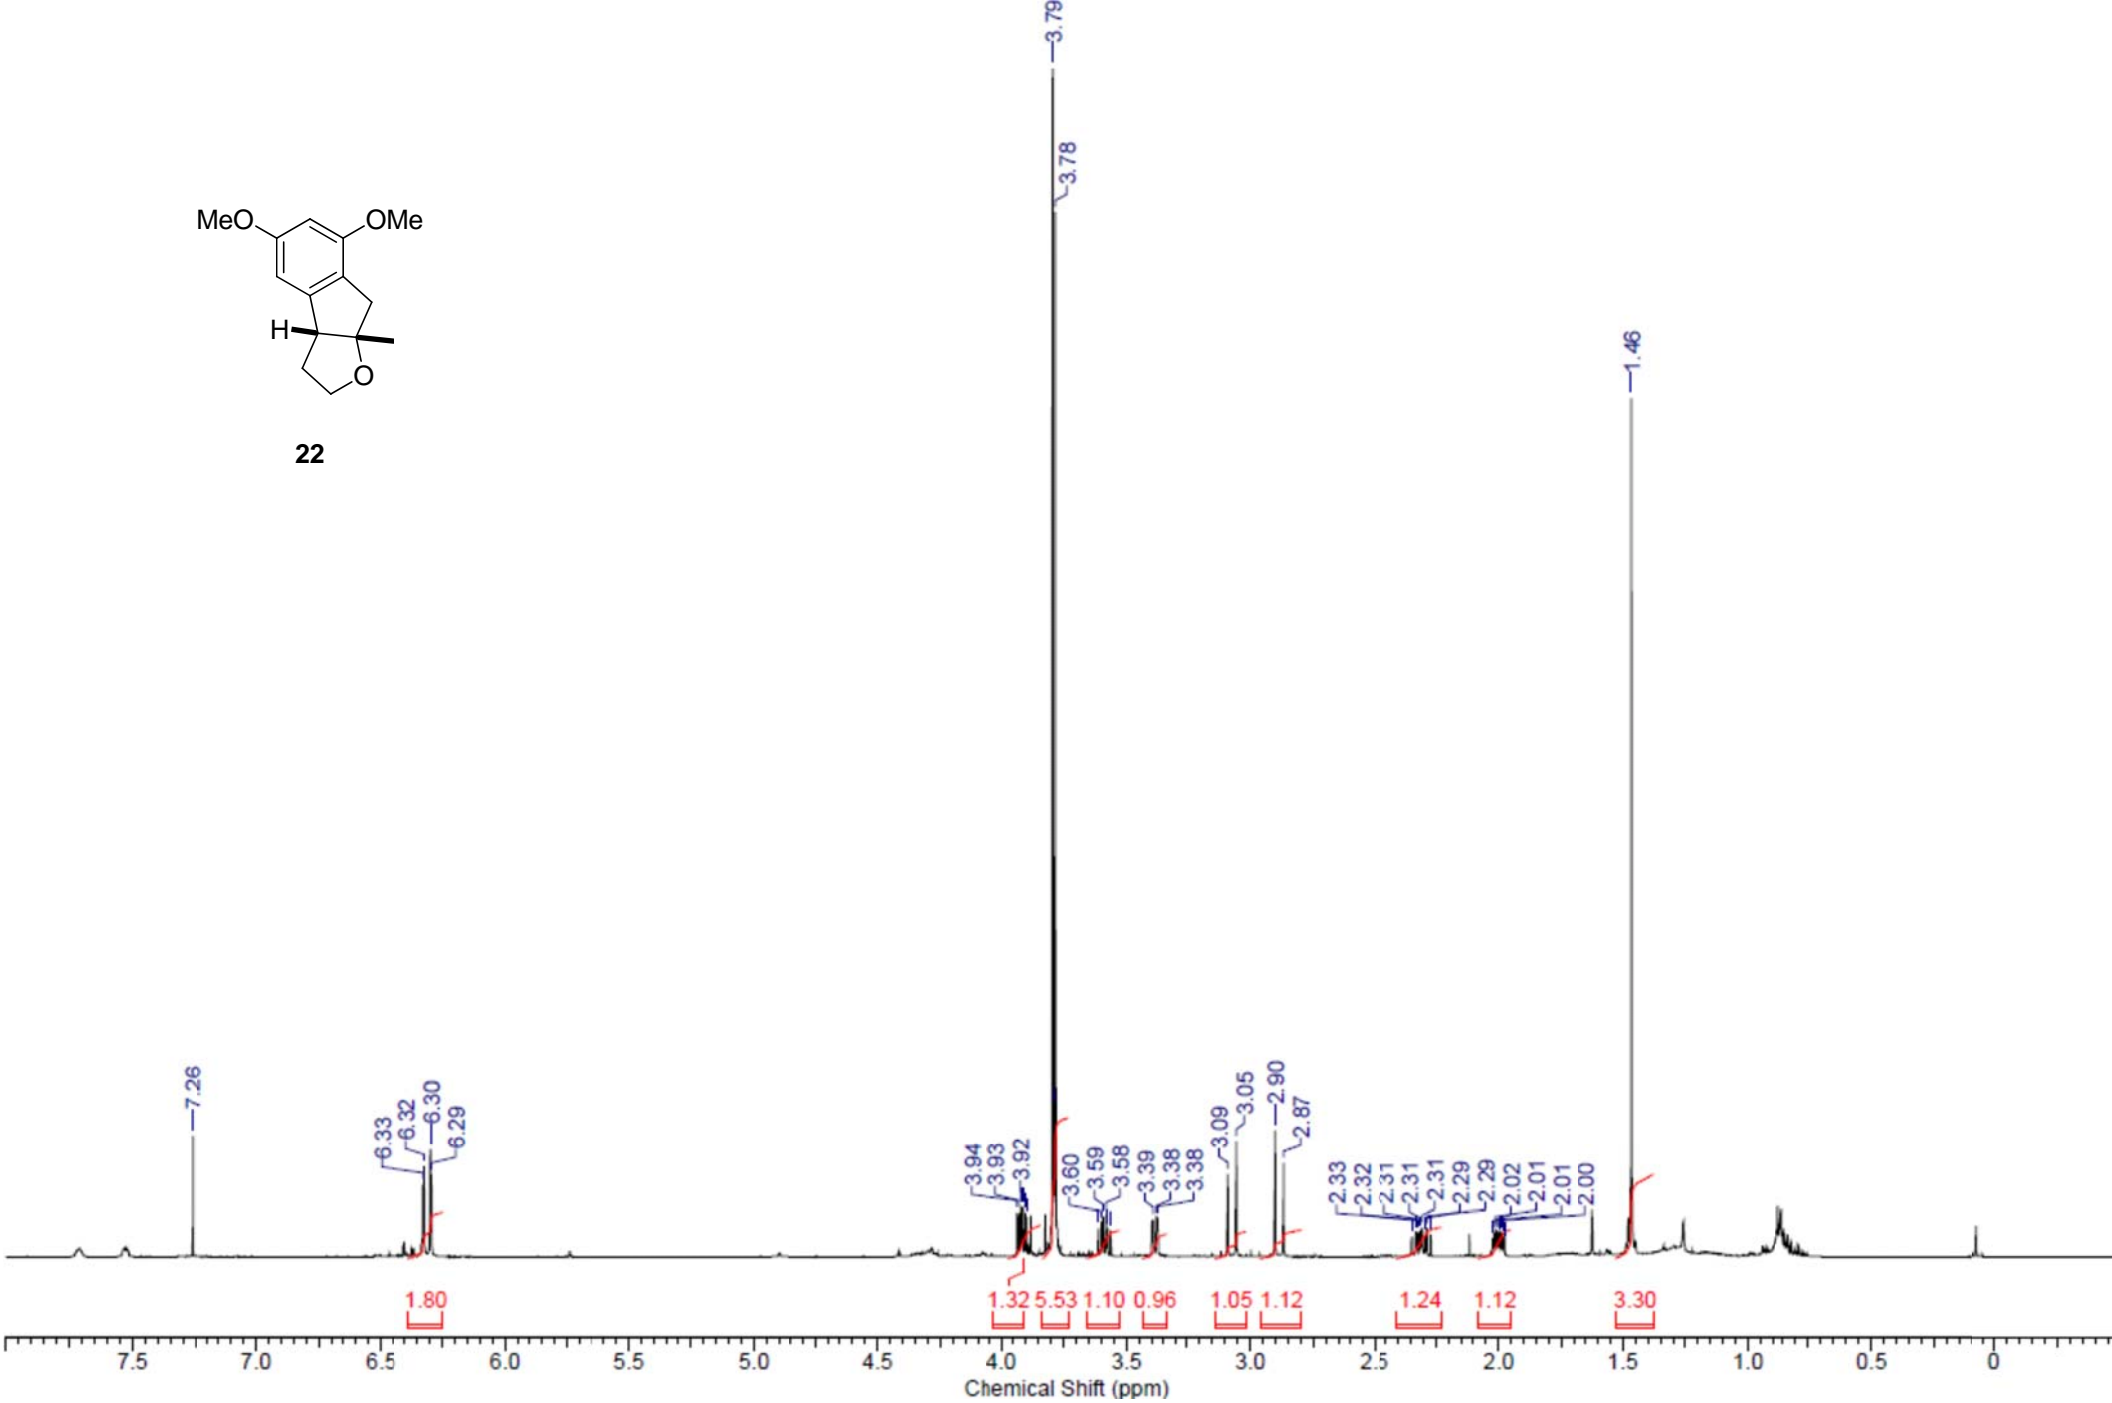

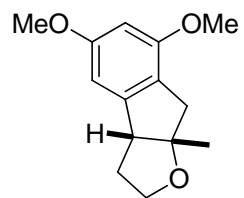

22

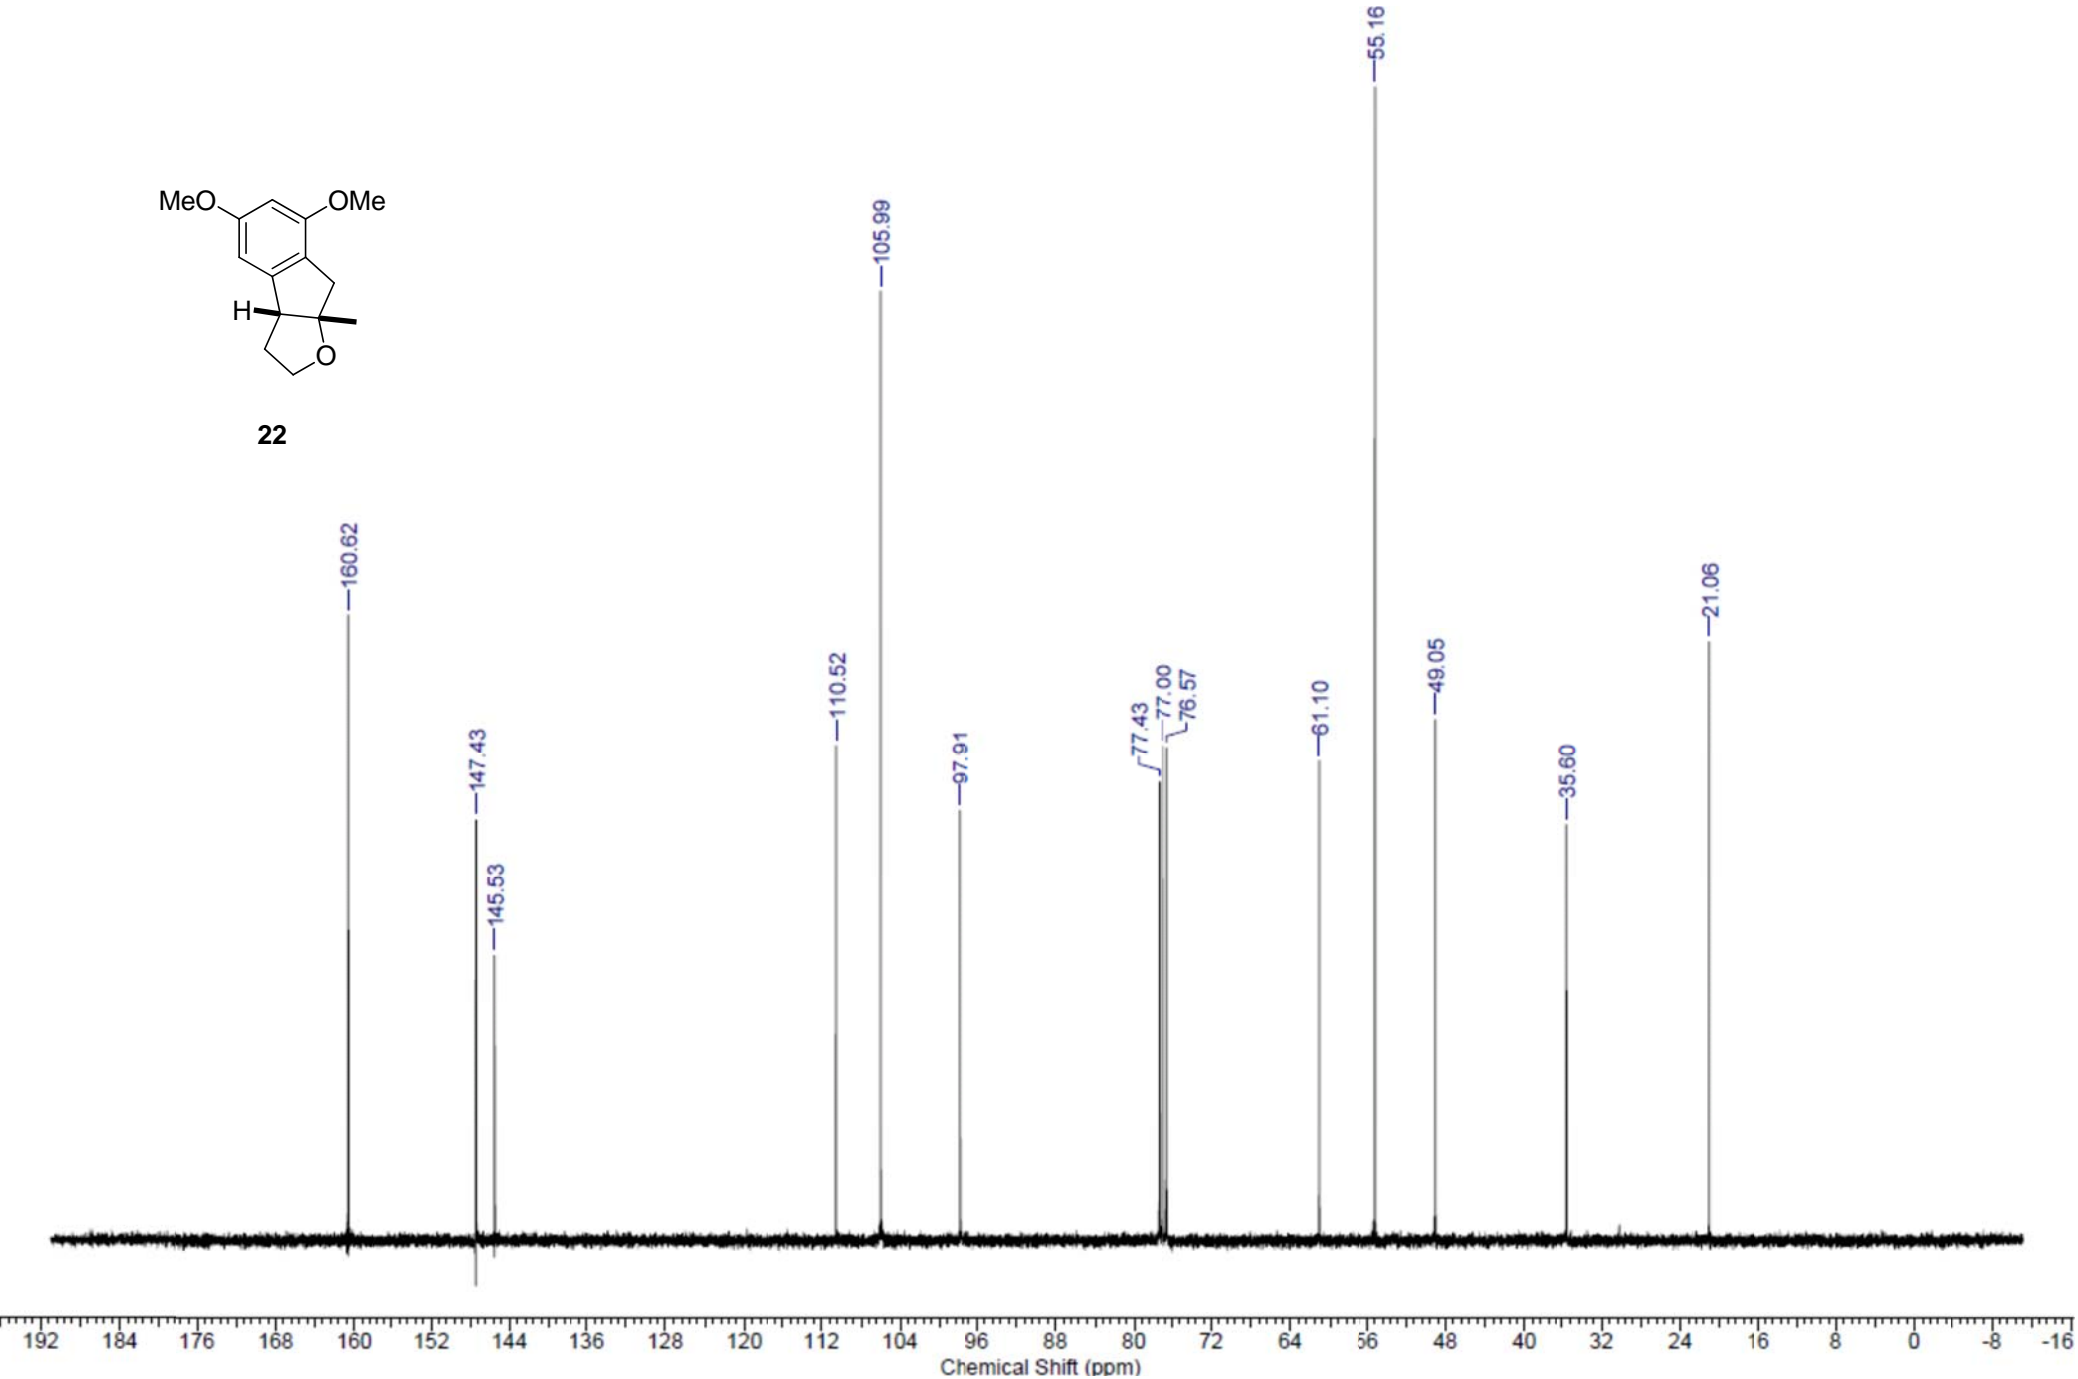

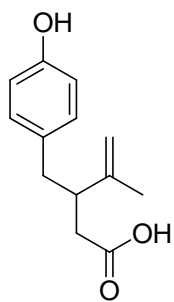

SM for Compound 3

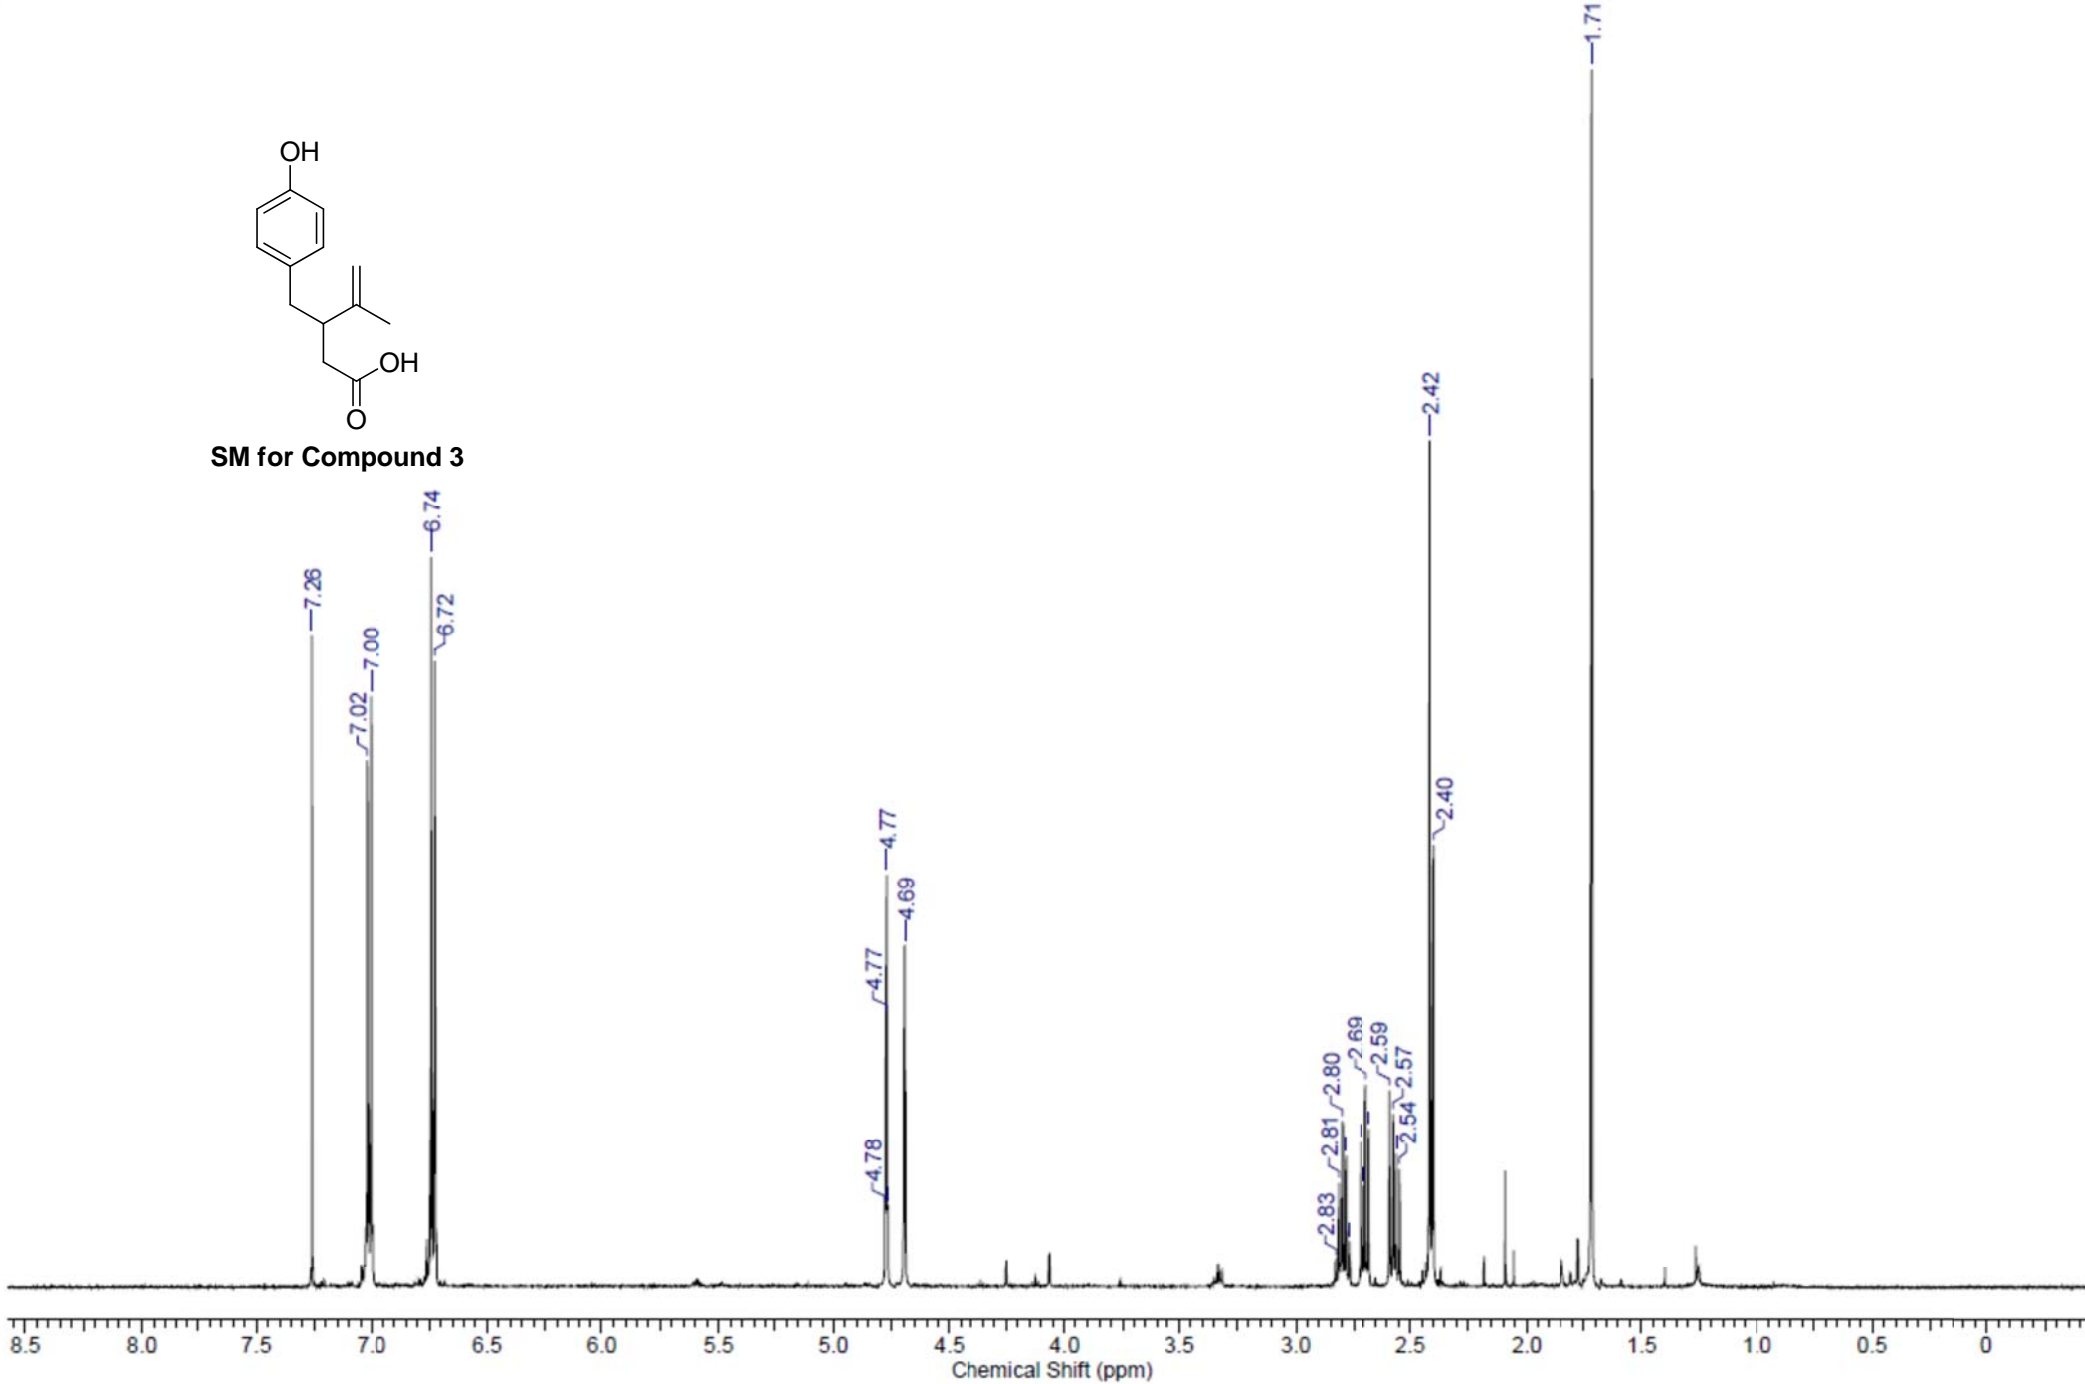

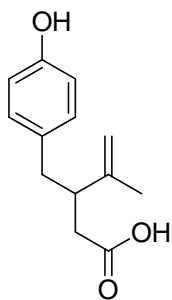

SM for Compound 3

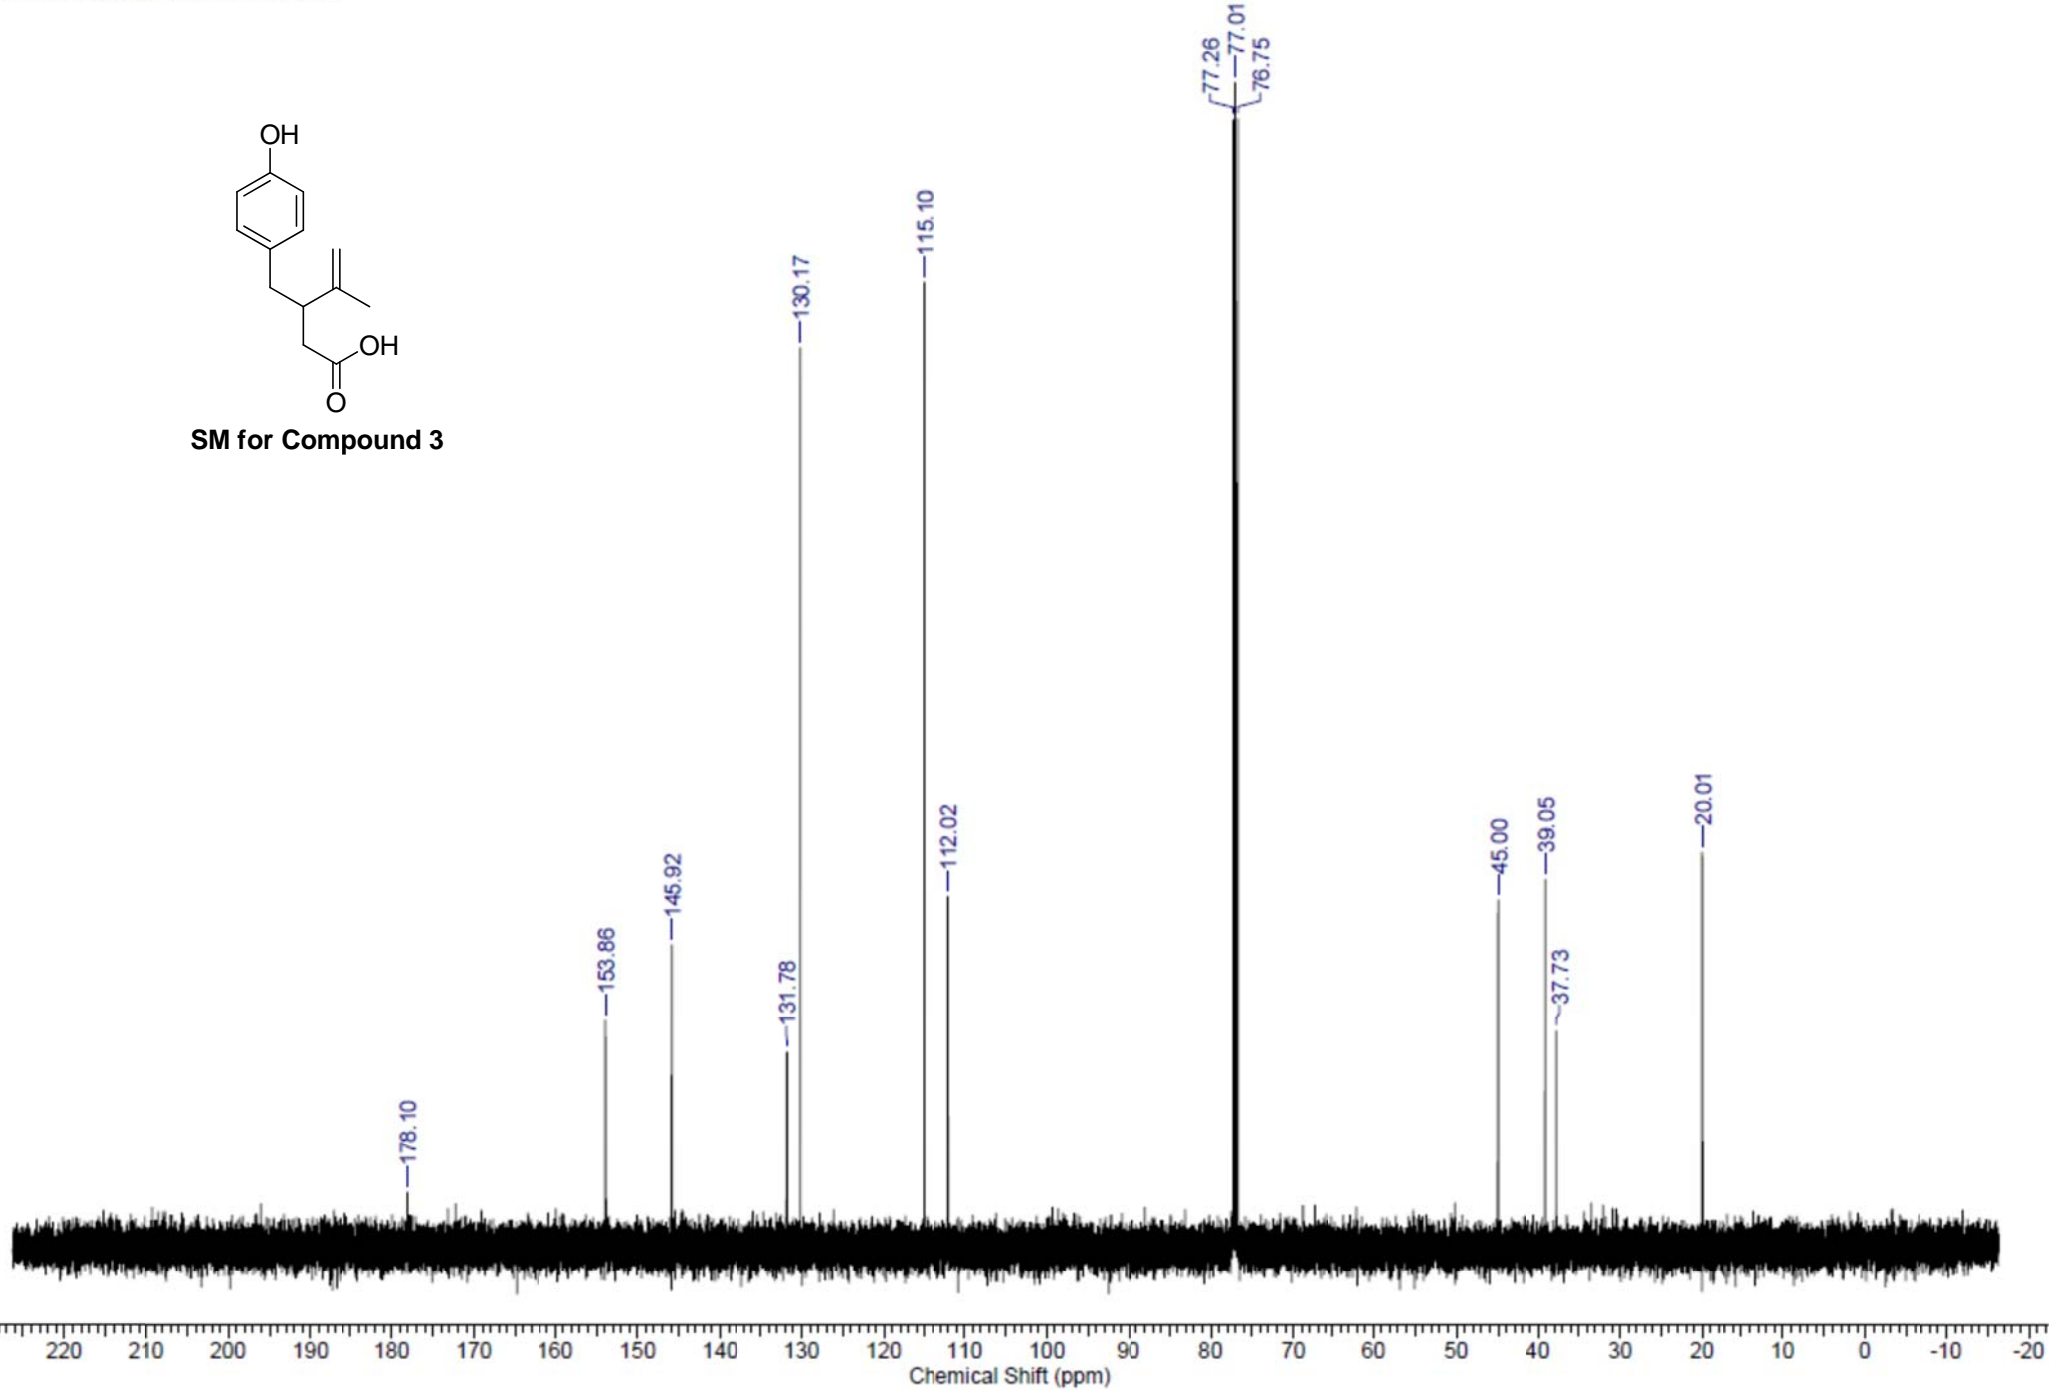

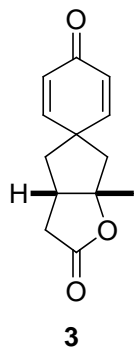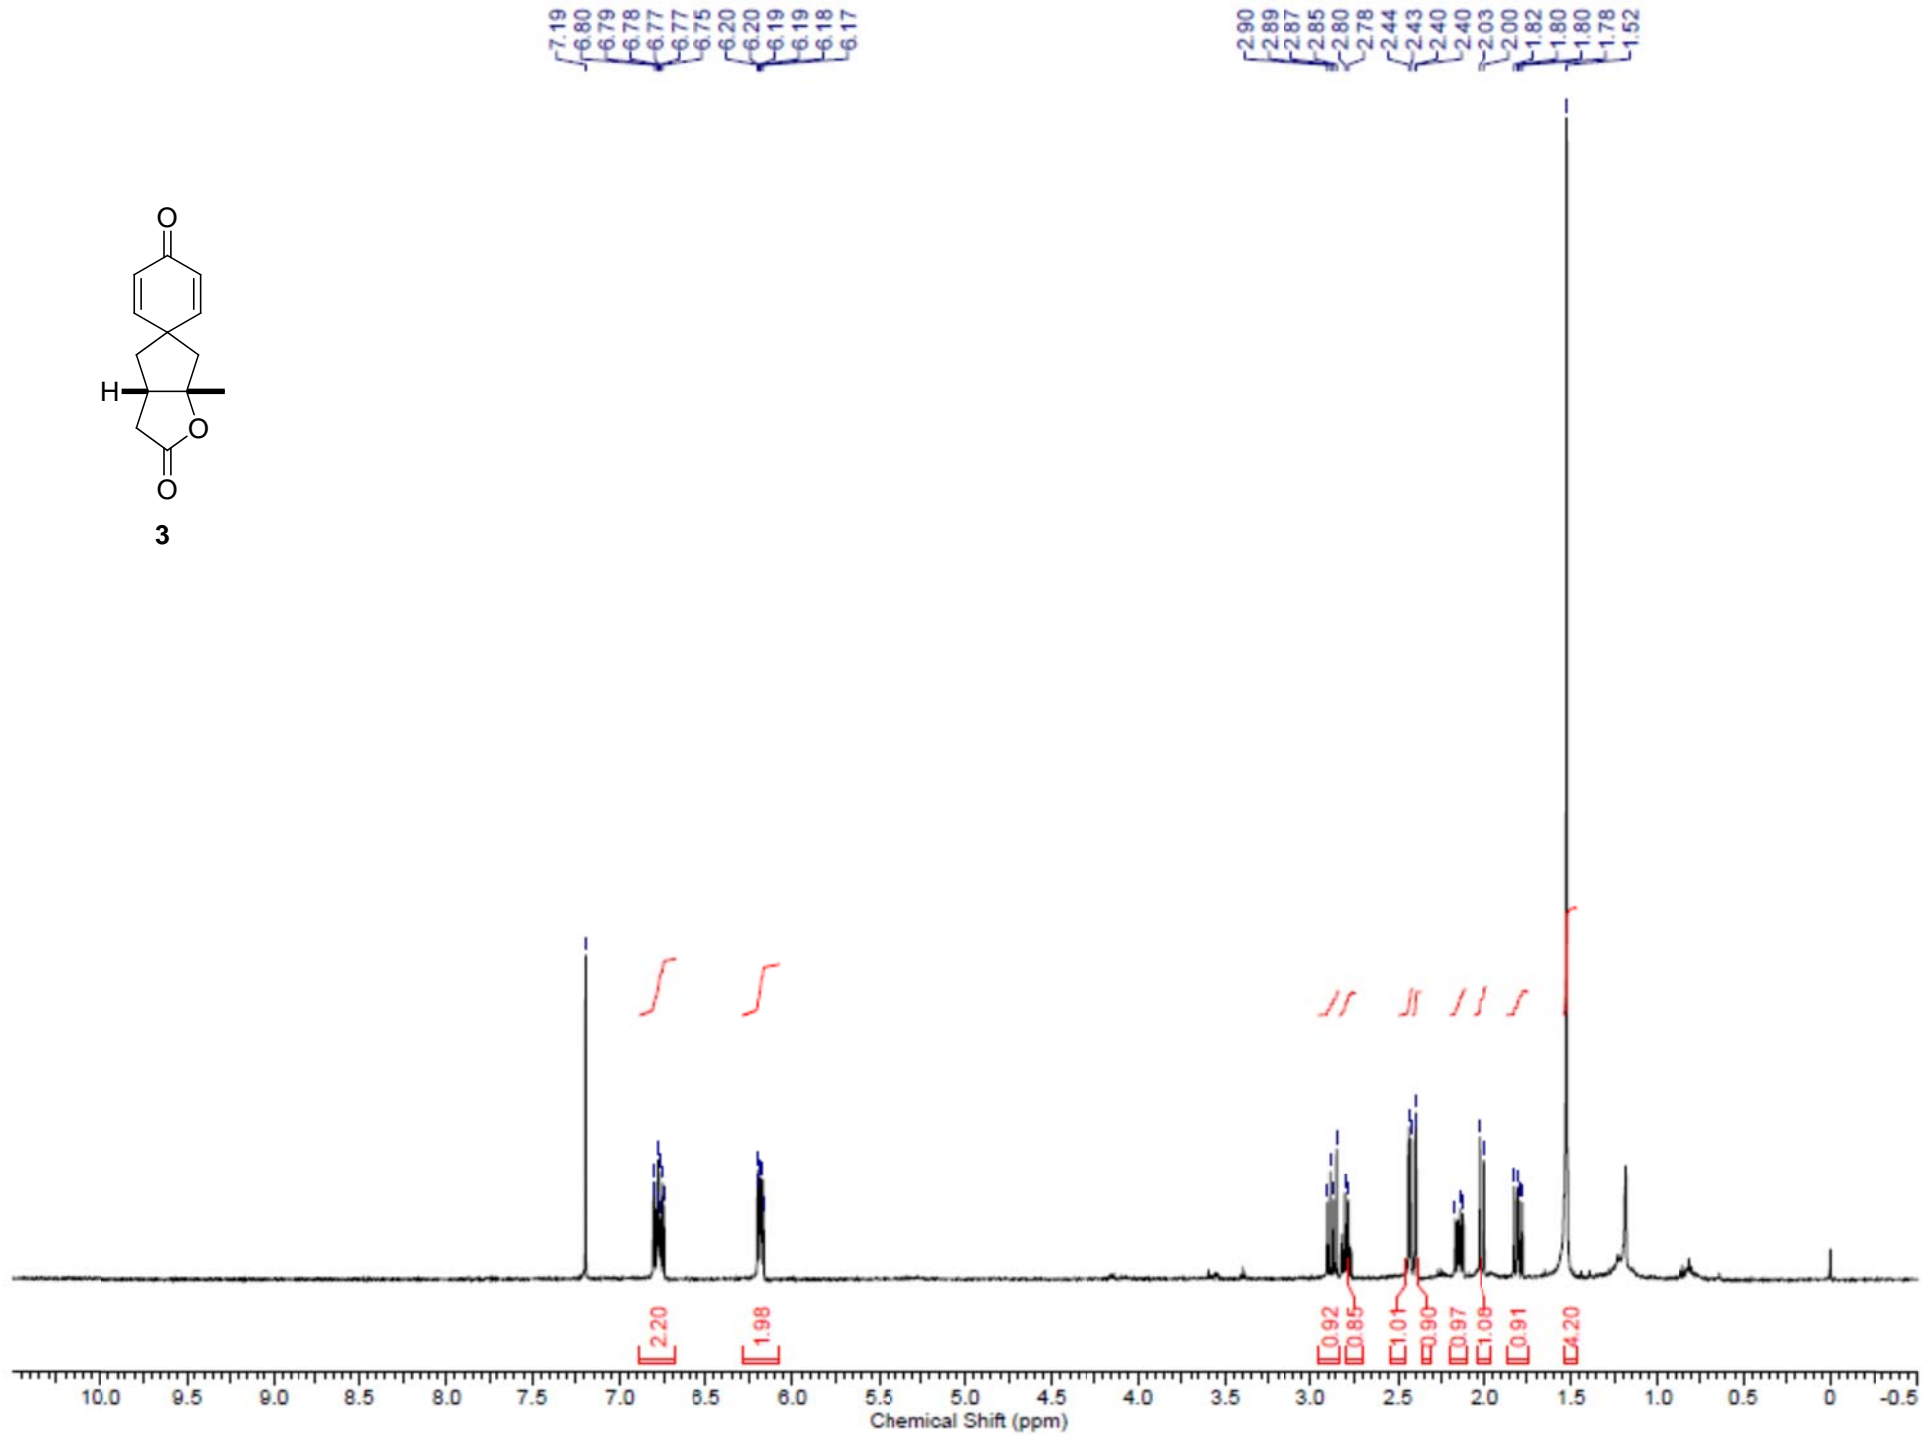

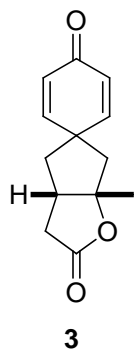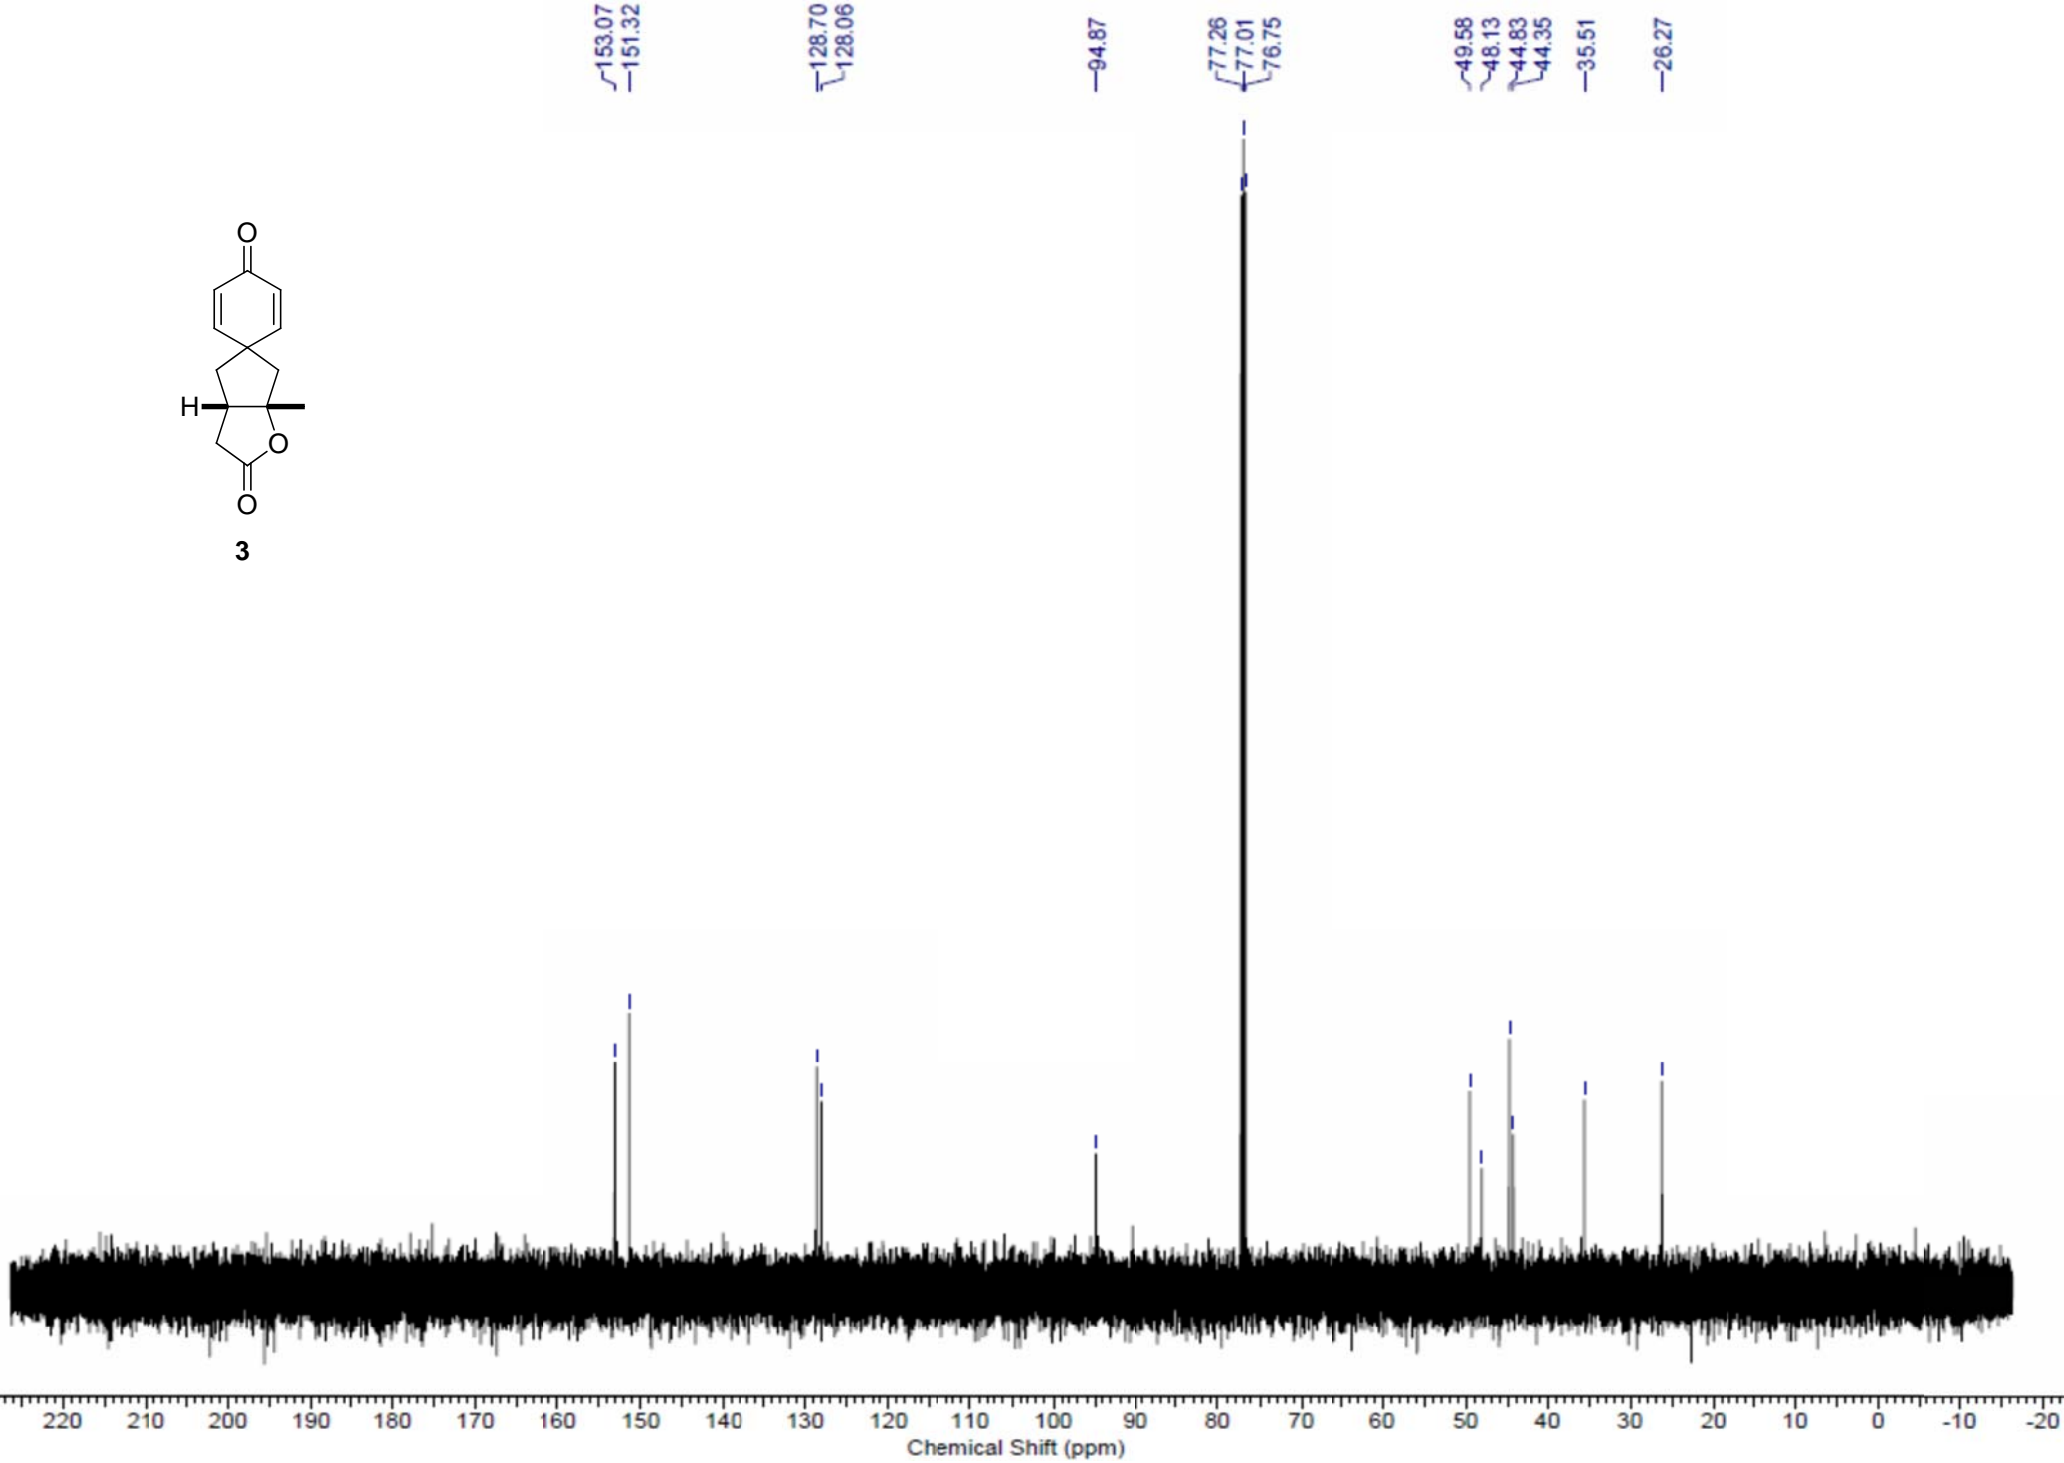

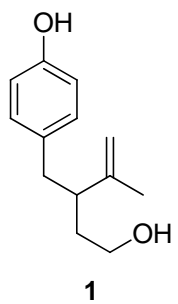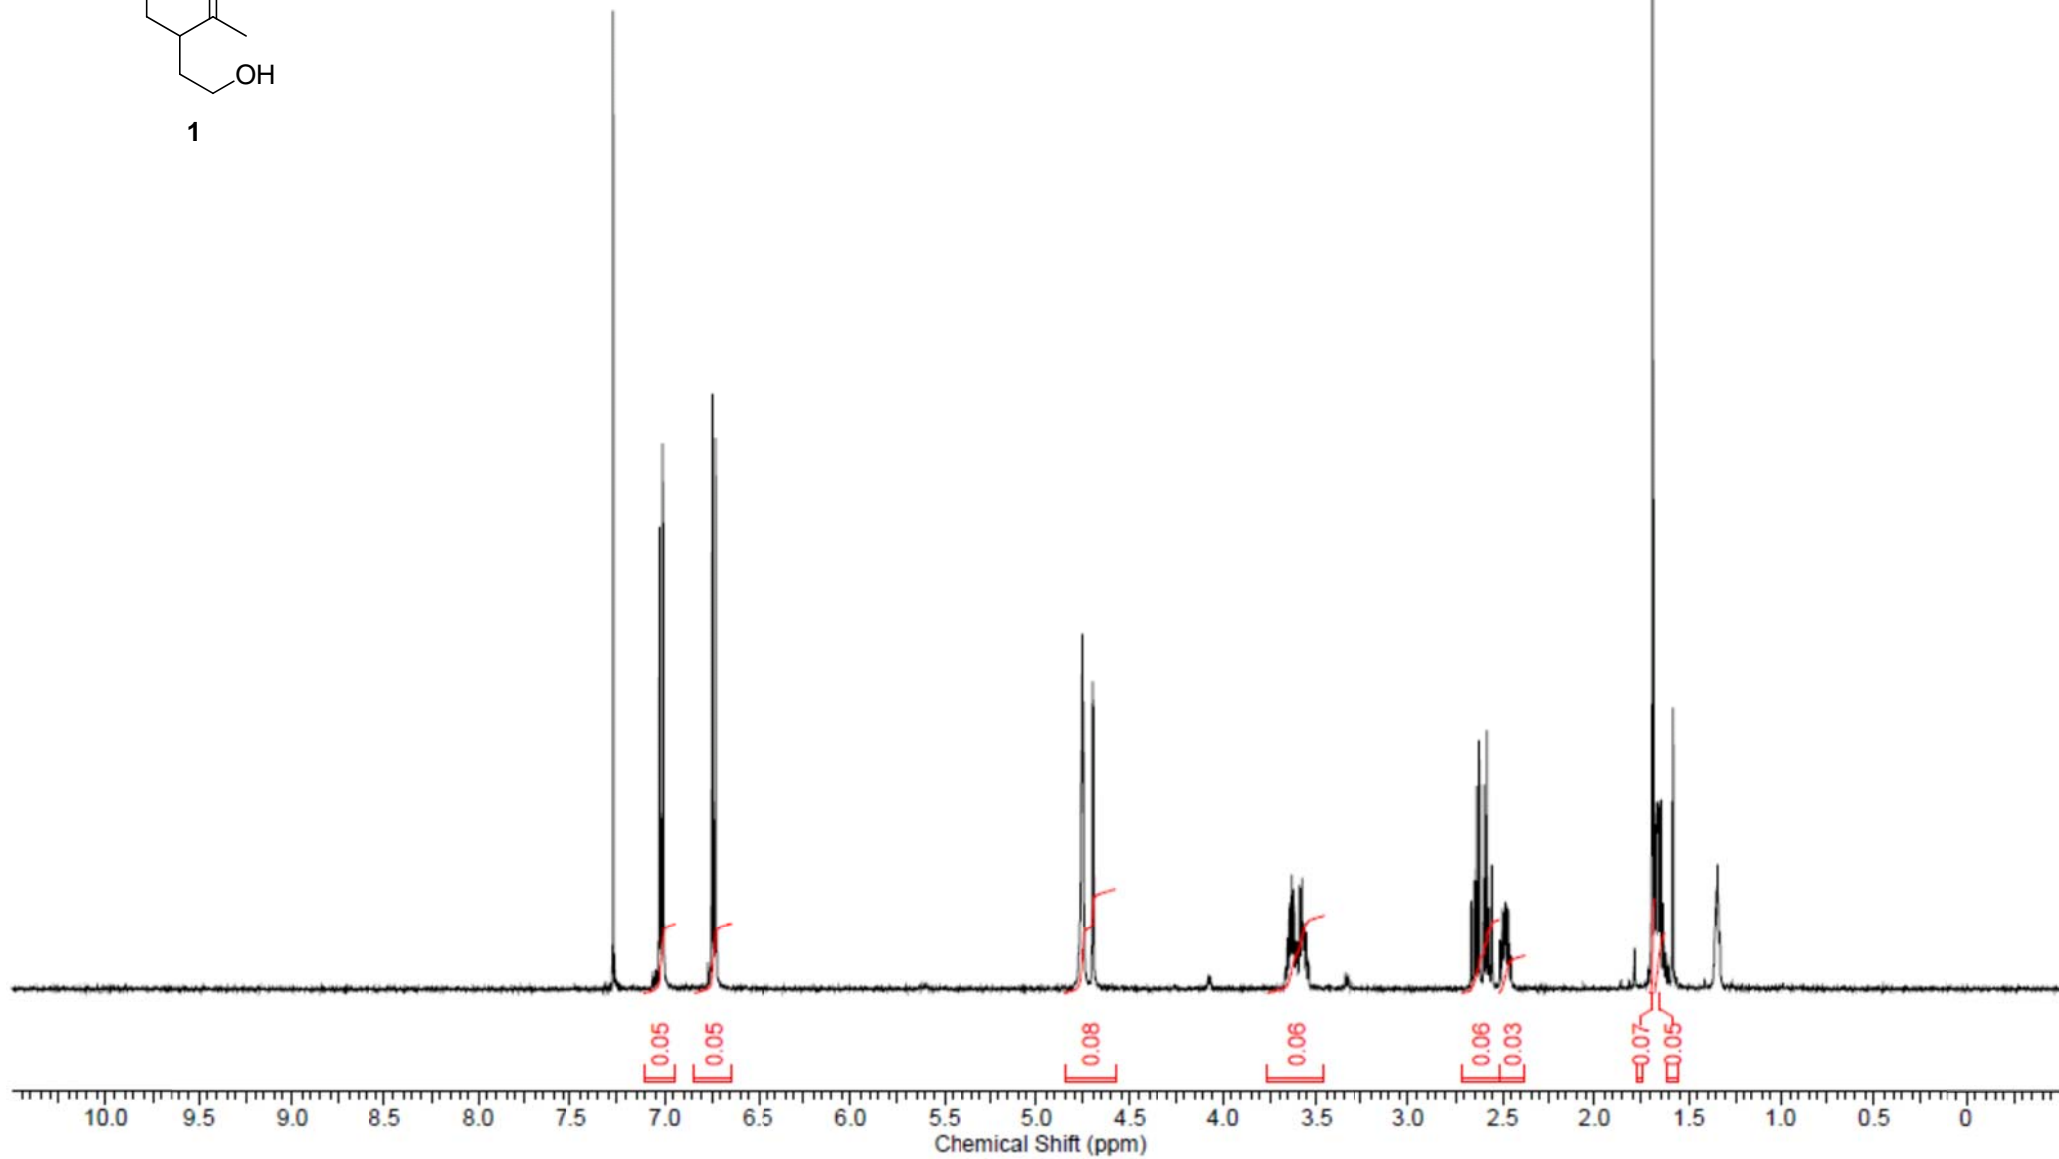

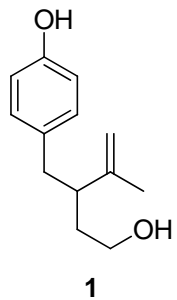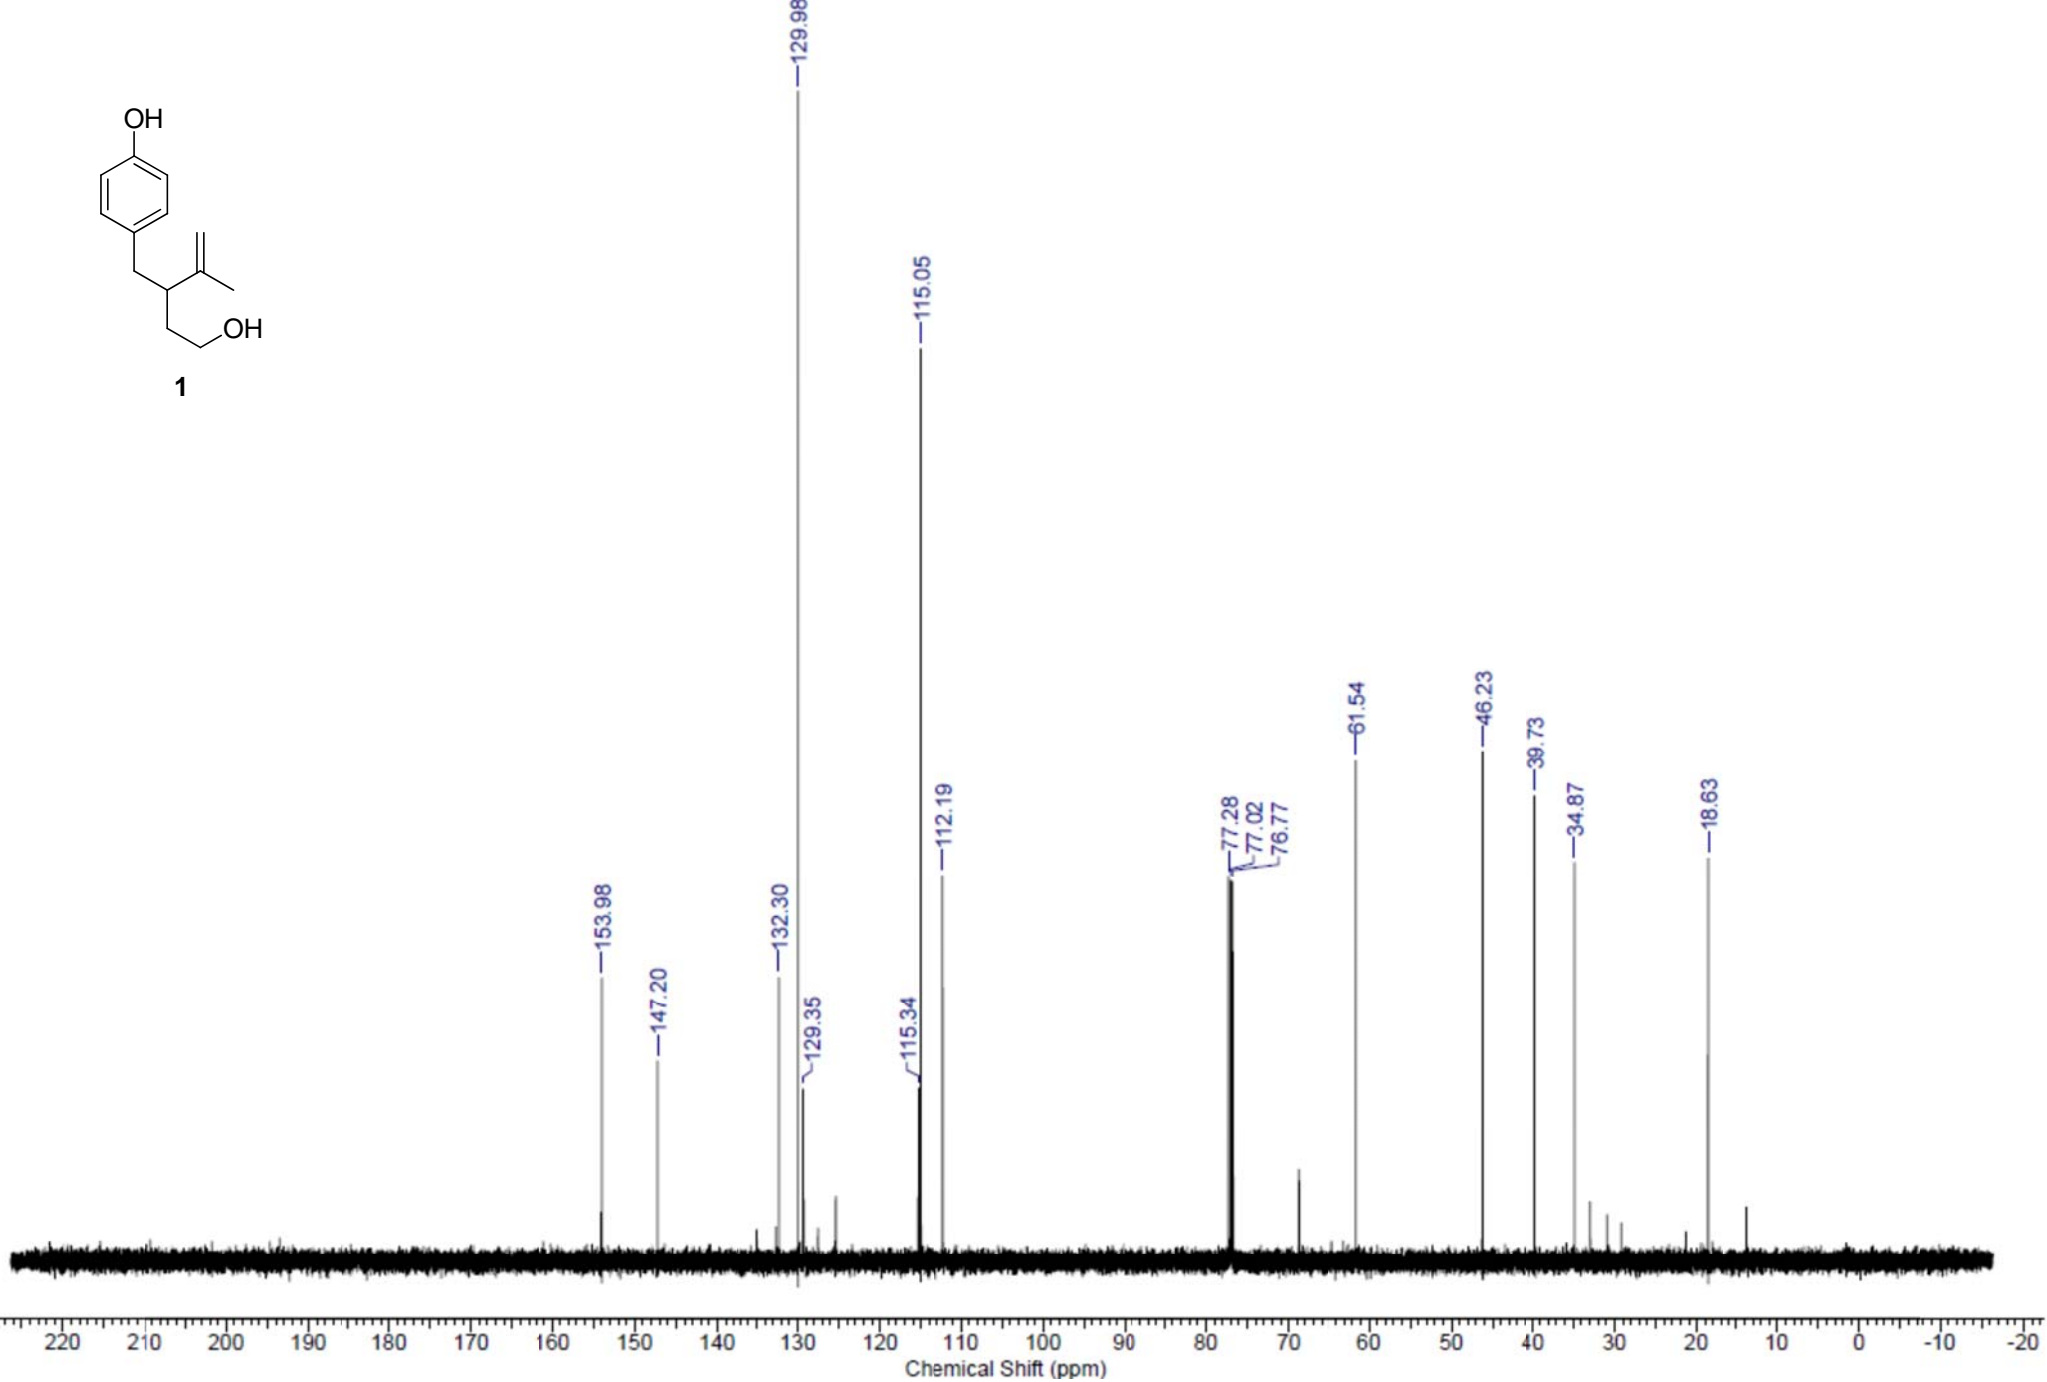



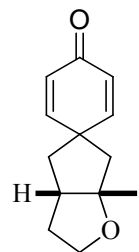

2

7.26  
7.04  
7.02  
7.01  
6.93  
6.93  
6.92  
6.91  
6.22  
6.21  
6.20  
6.19  
6.19  
6.19  
6.18  
3.99  
3.99  
3.97  
3.96  
3.95  
3.95  
2.67  
2.65  
2.64  
2.19  
2.16  
2.04  
2.03  
1.92  
1.90  
1.76  
1.76  
1.75  
1.74  
1.40

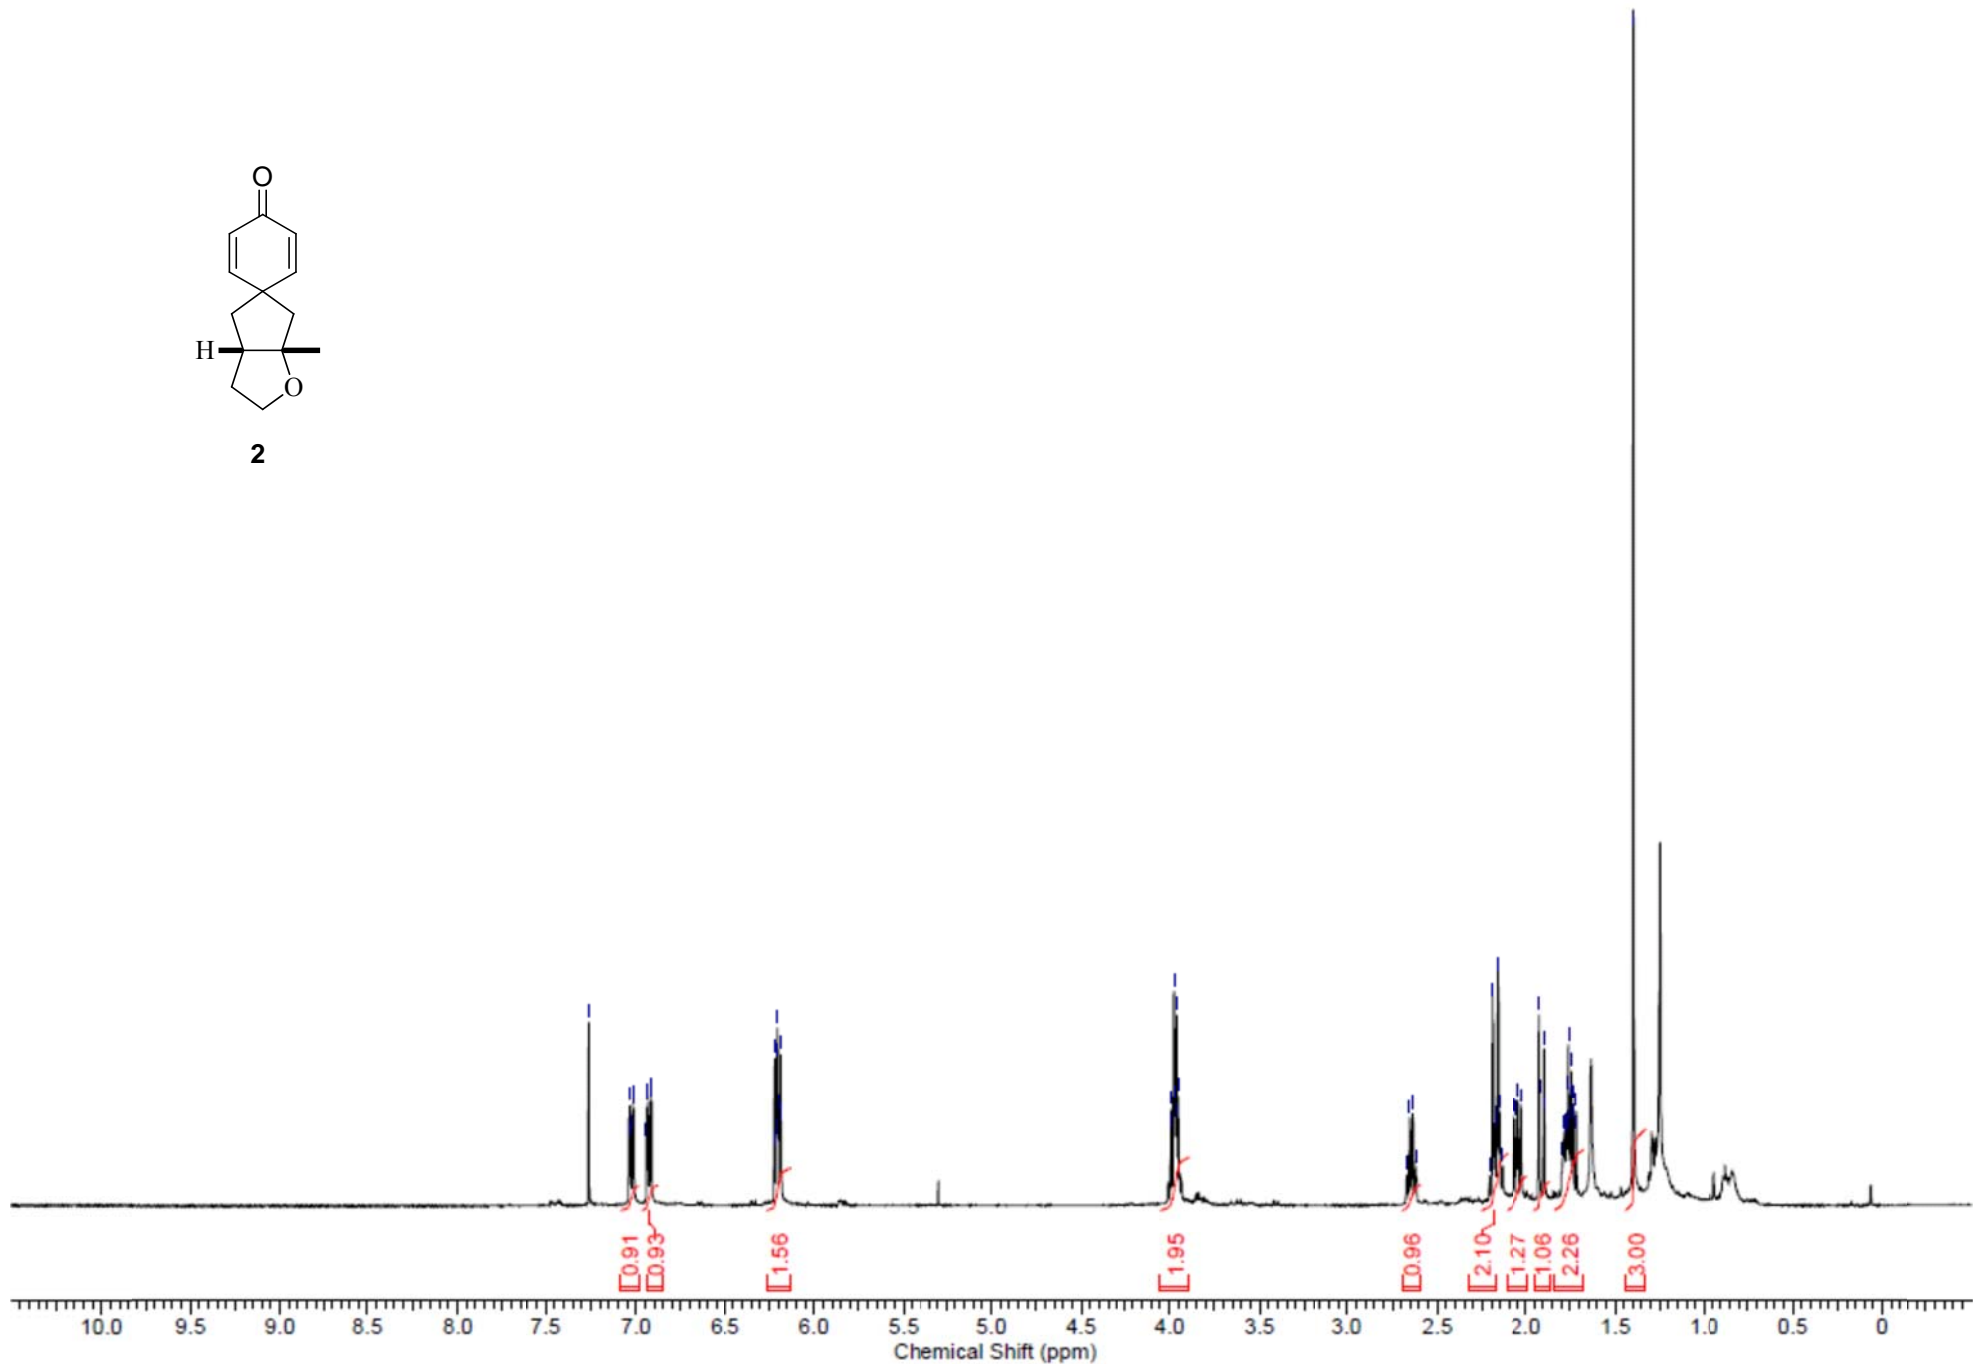

S73

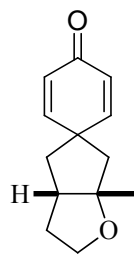

2

153.07  
151.32

128.70  
128.06

94.87

77.26  
77.01  
76.75

49.58  
48.13  
44.83  
44.35

35.51

26.27

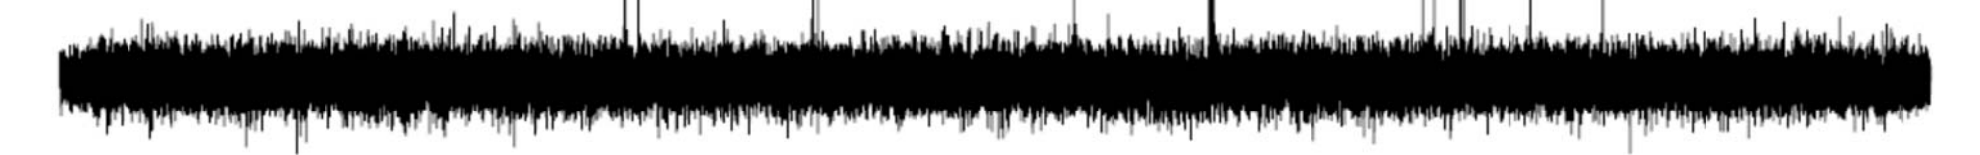

Chemical Shift (ppm)

S74

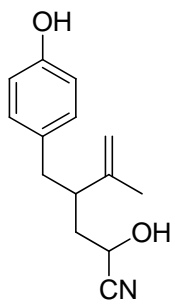

SM for Compound 4

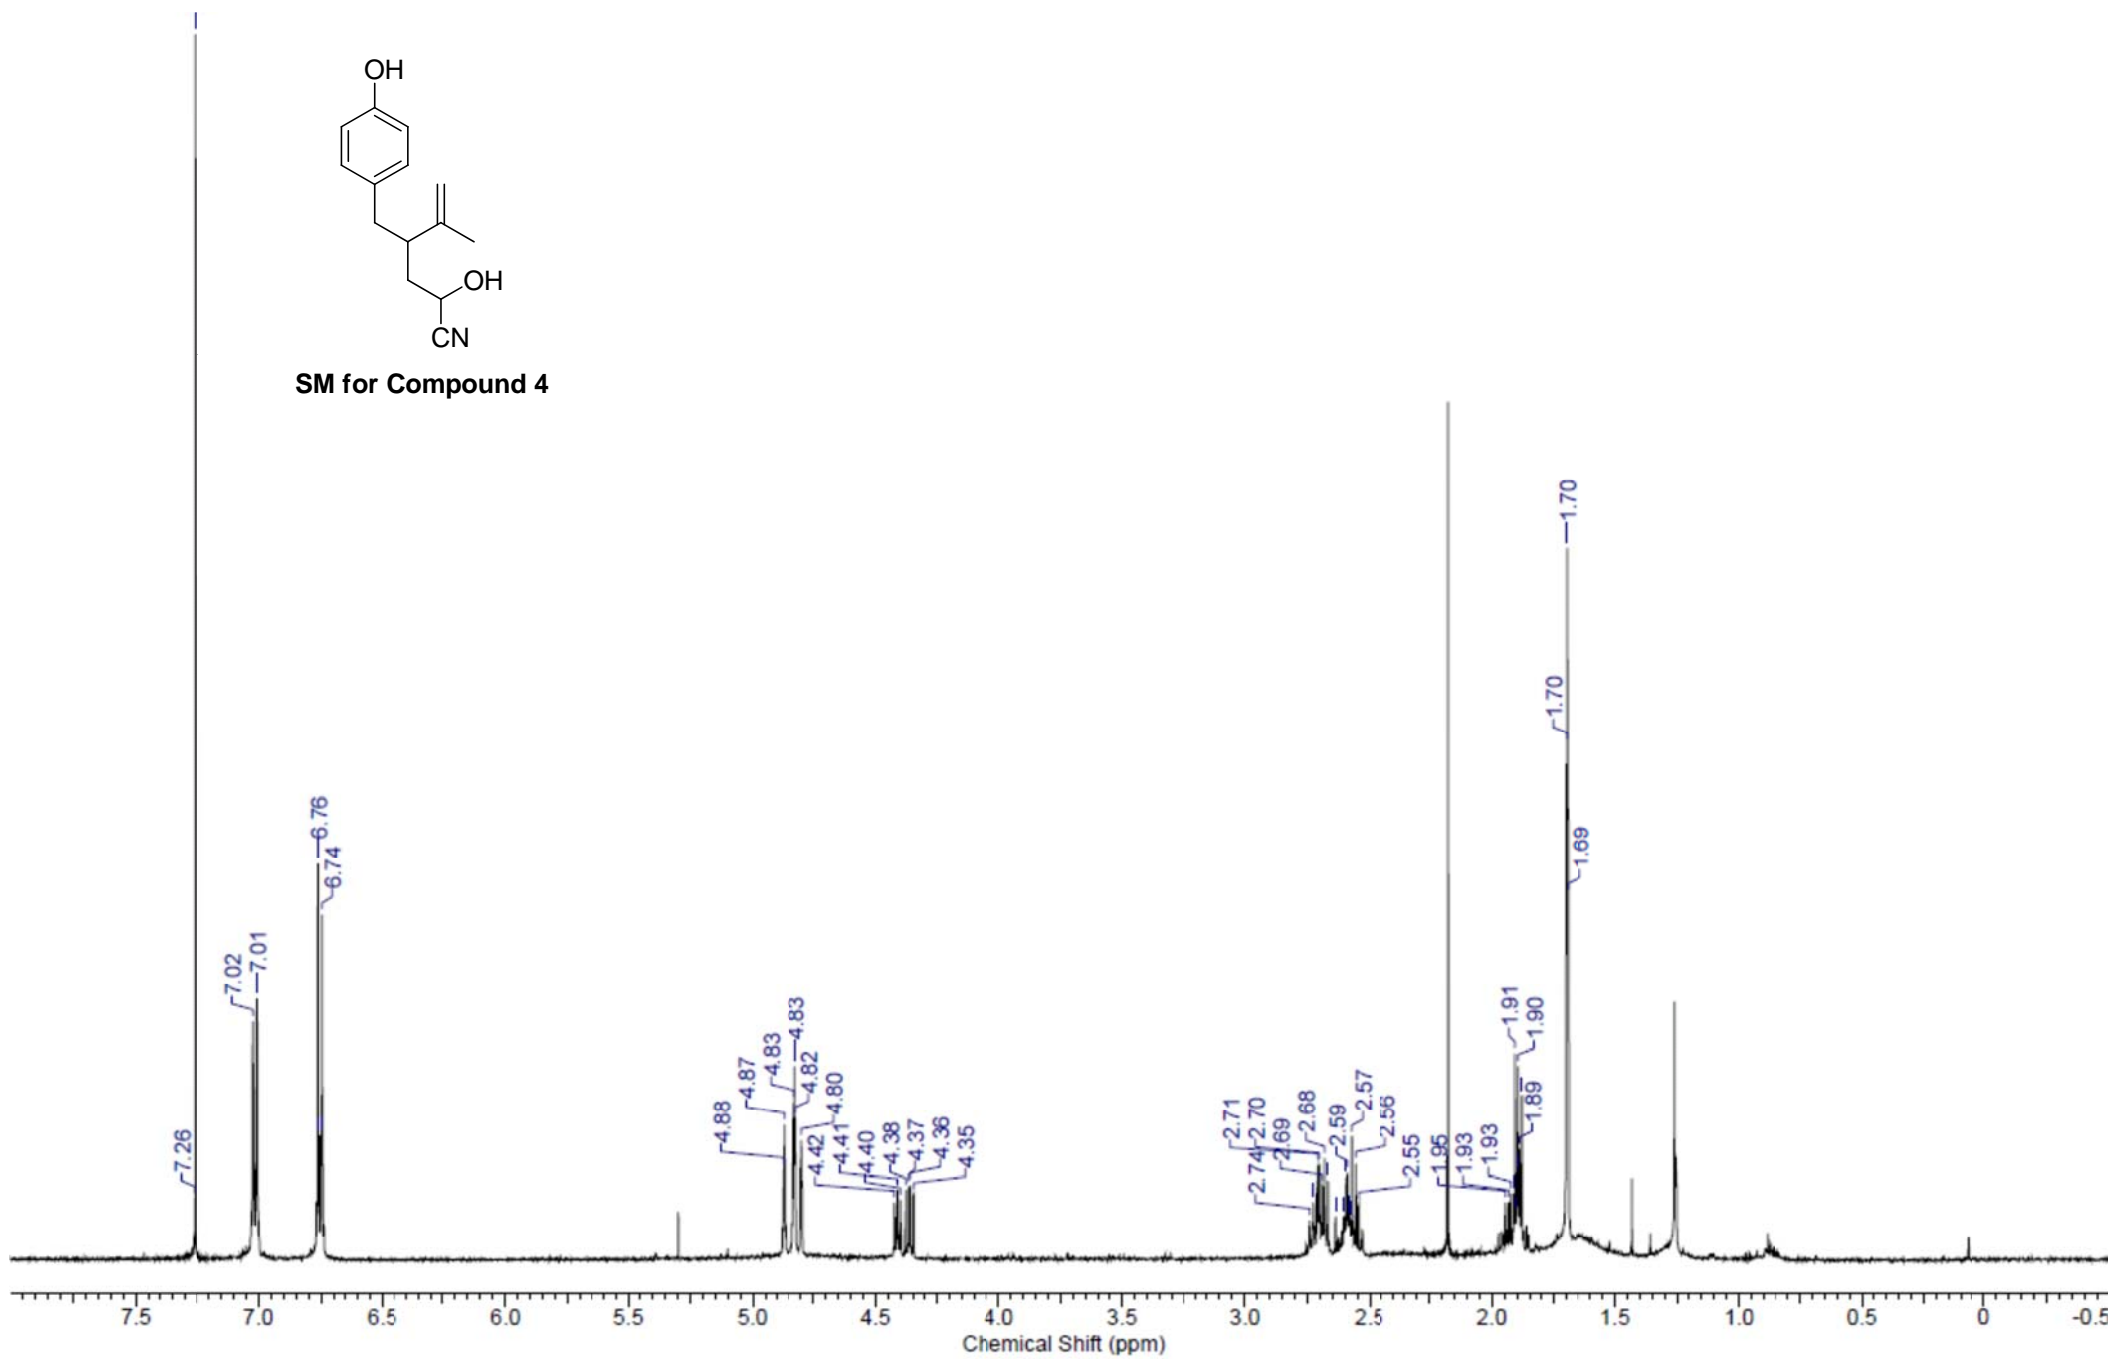

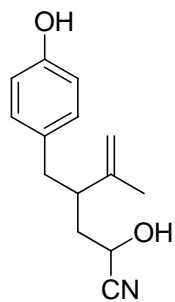

SM for Compound 4

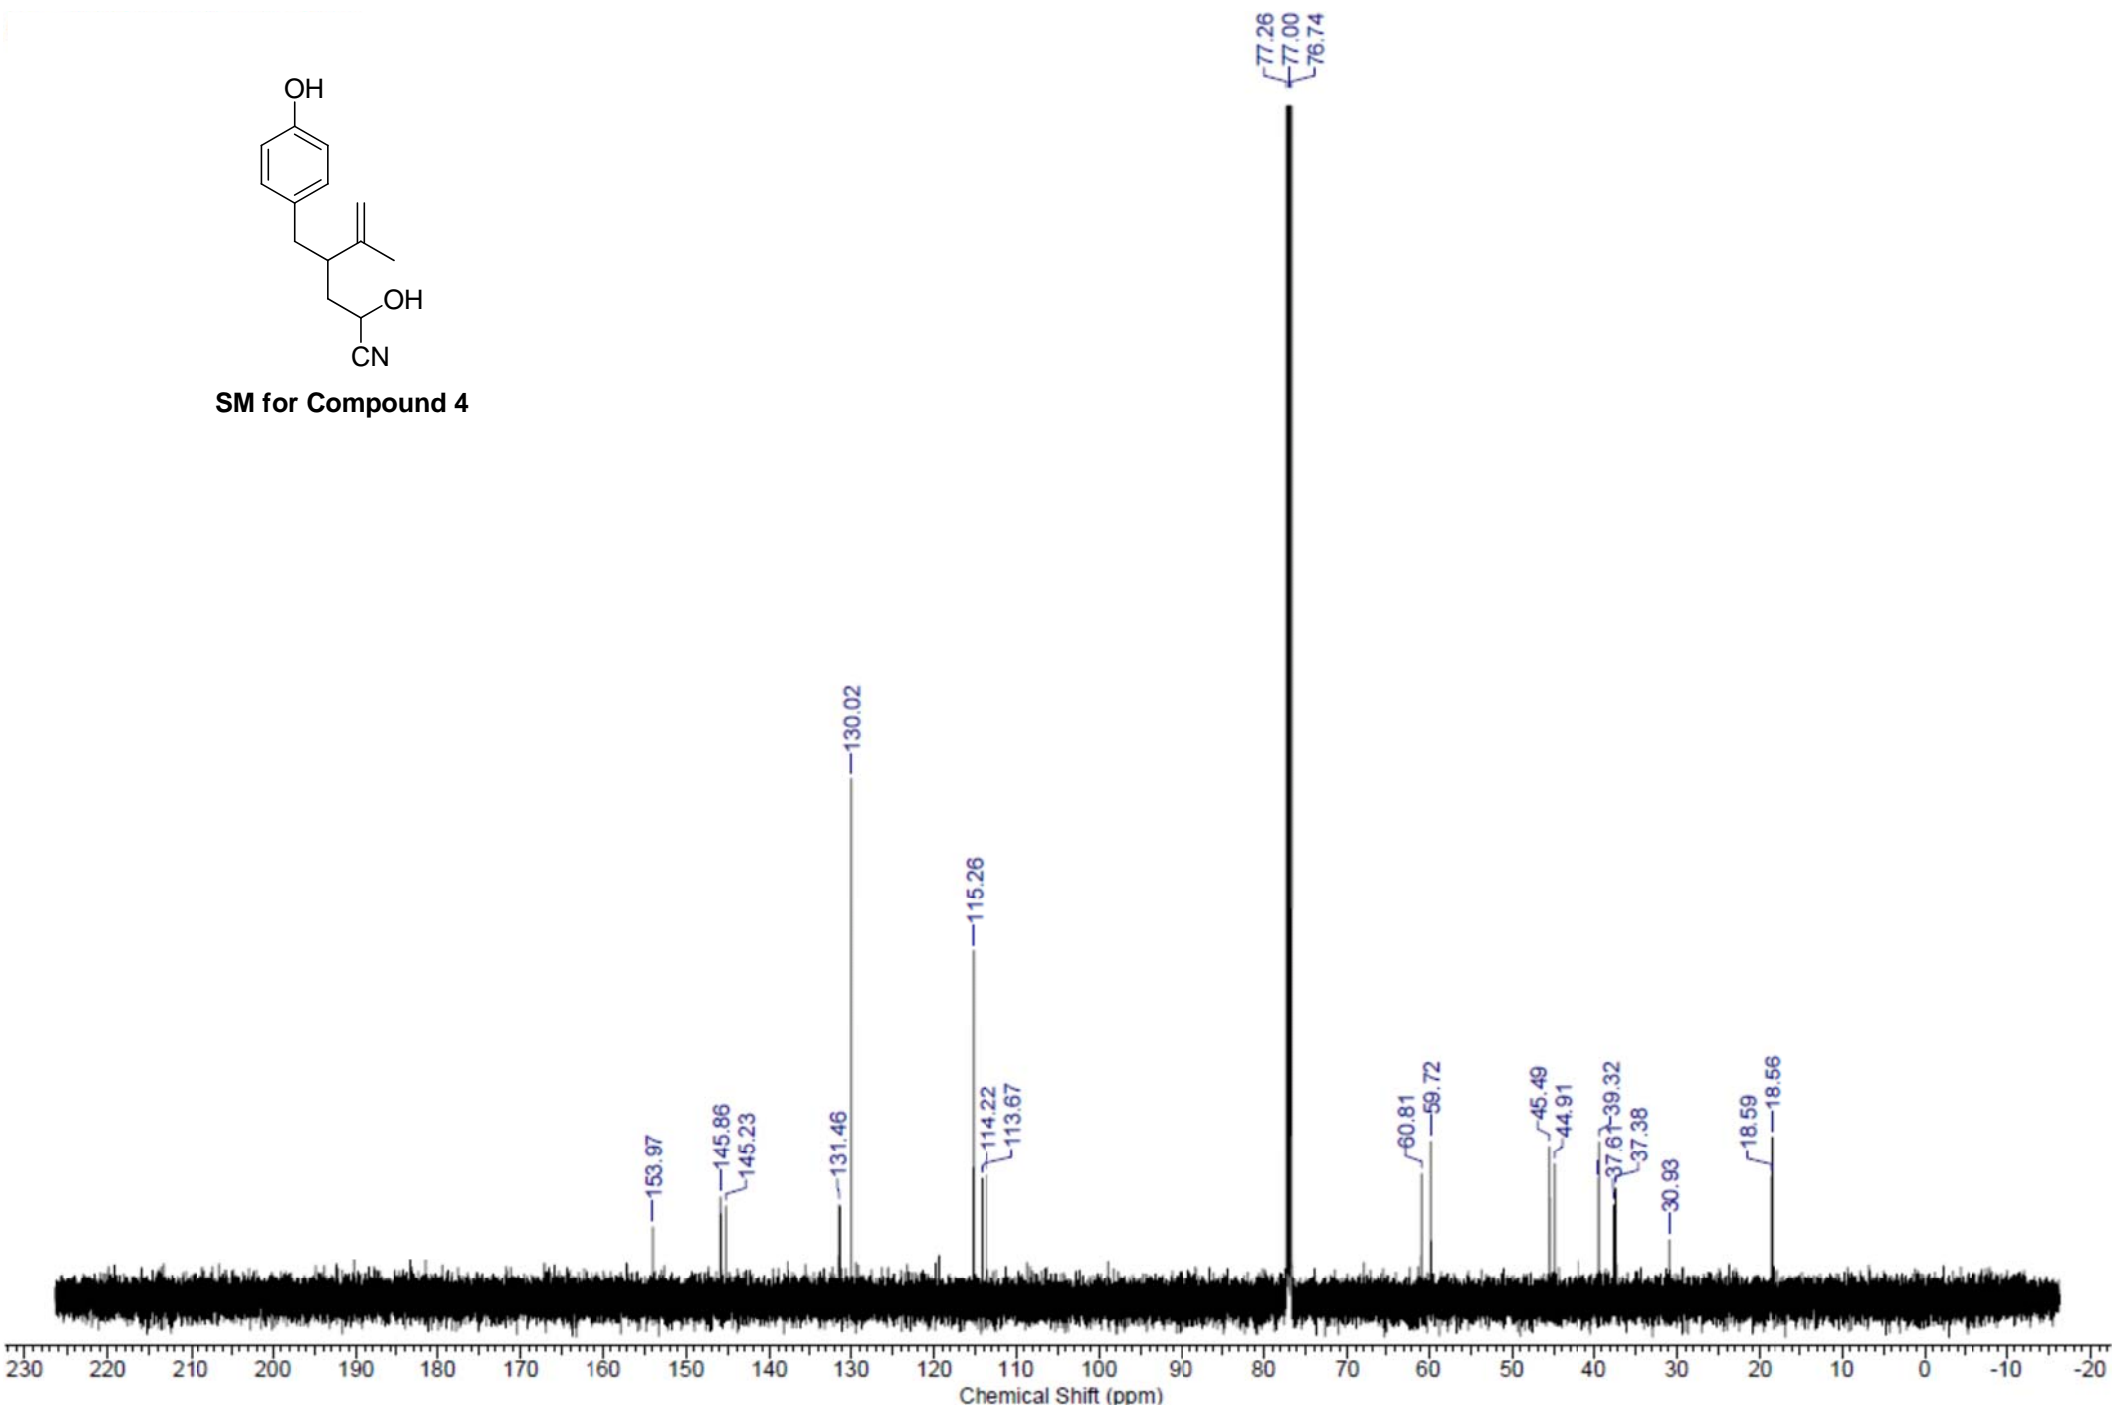

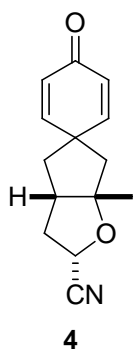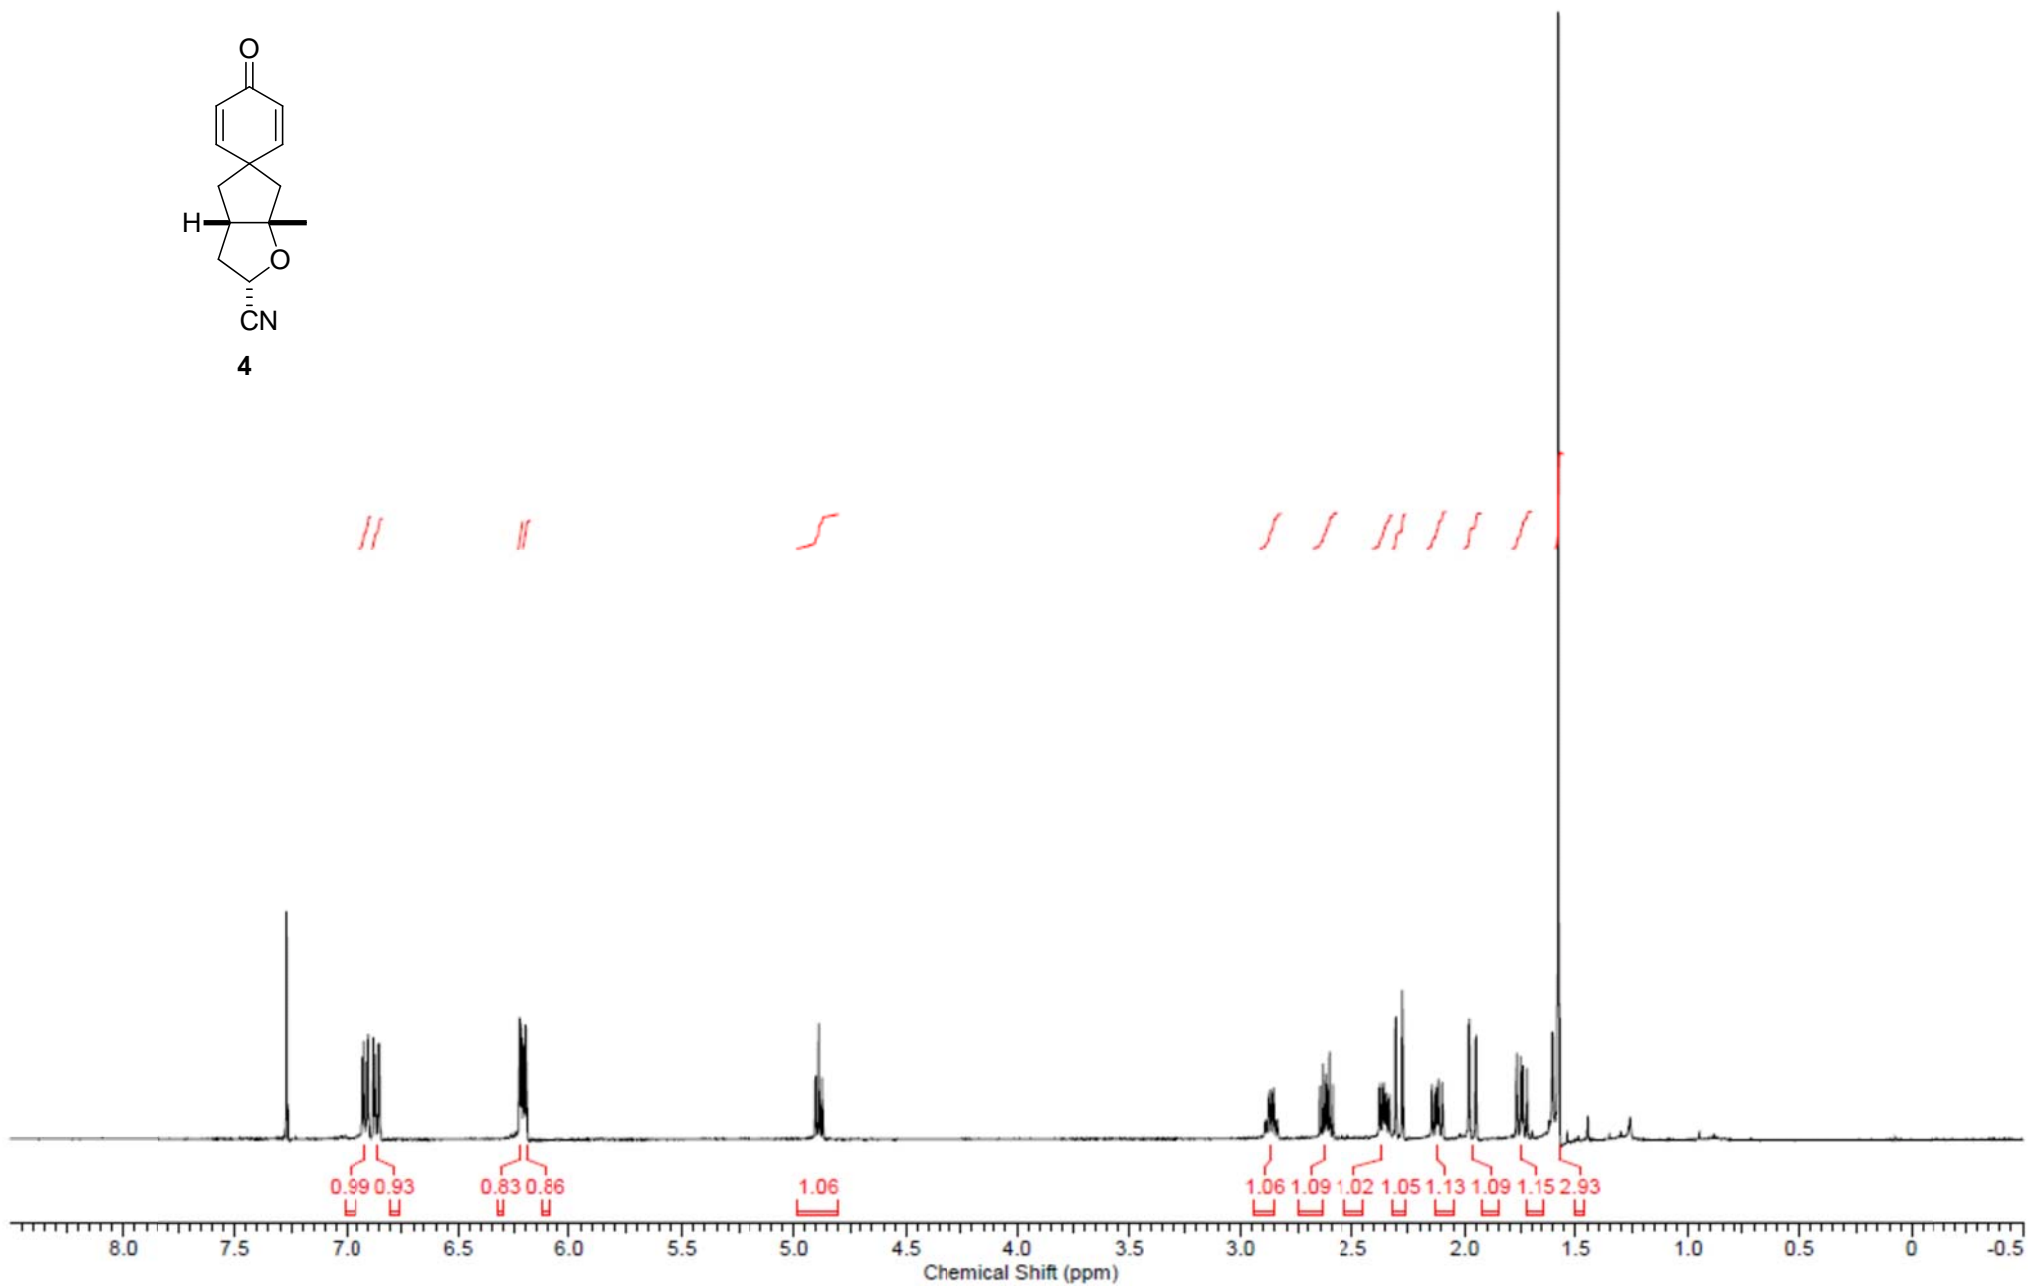

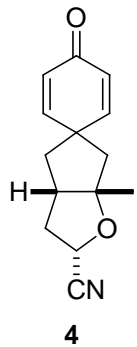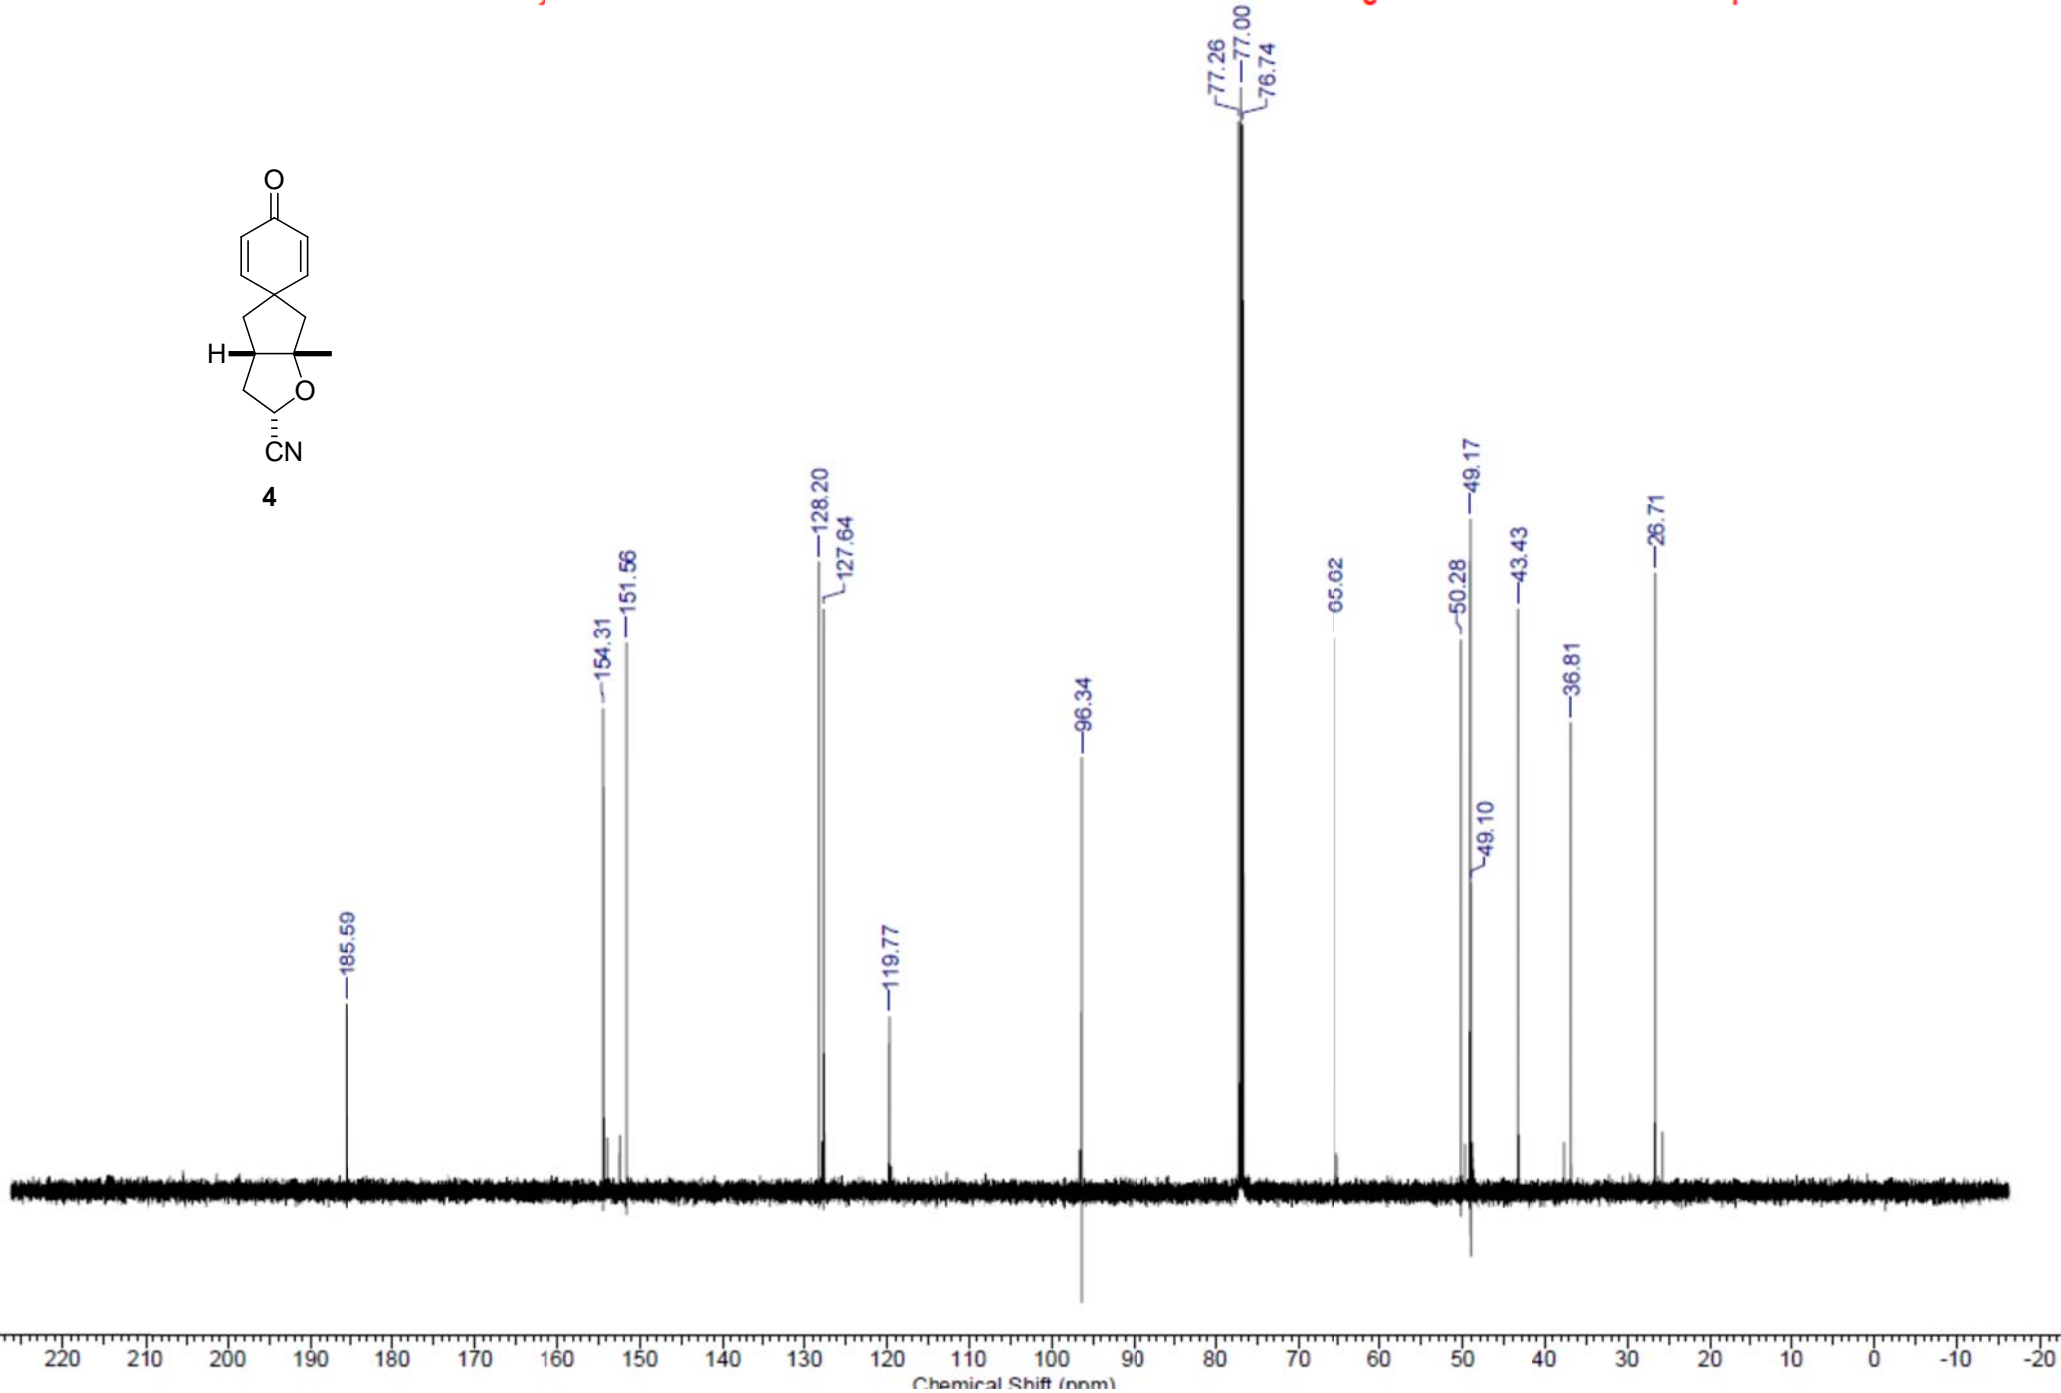

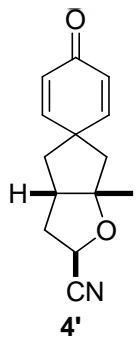

Handwritten red annotations above the spectrum: three vertical lines at ~7.1 ppm, a bracket at ~6.2 ppm, a vertical line at ~4.8 ppm, and a group of vertical lines between 2.5 and 3.2 ppm.

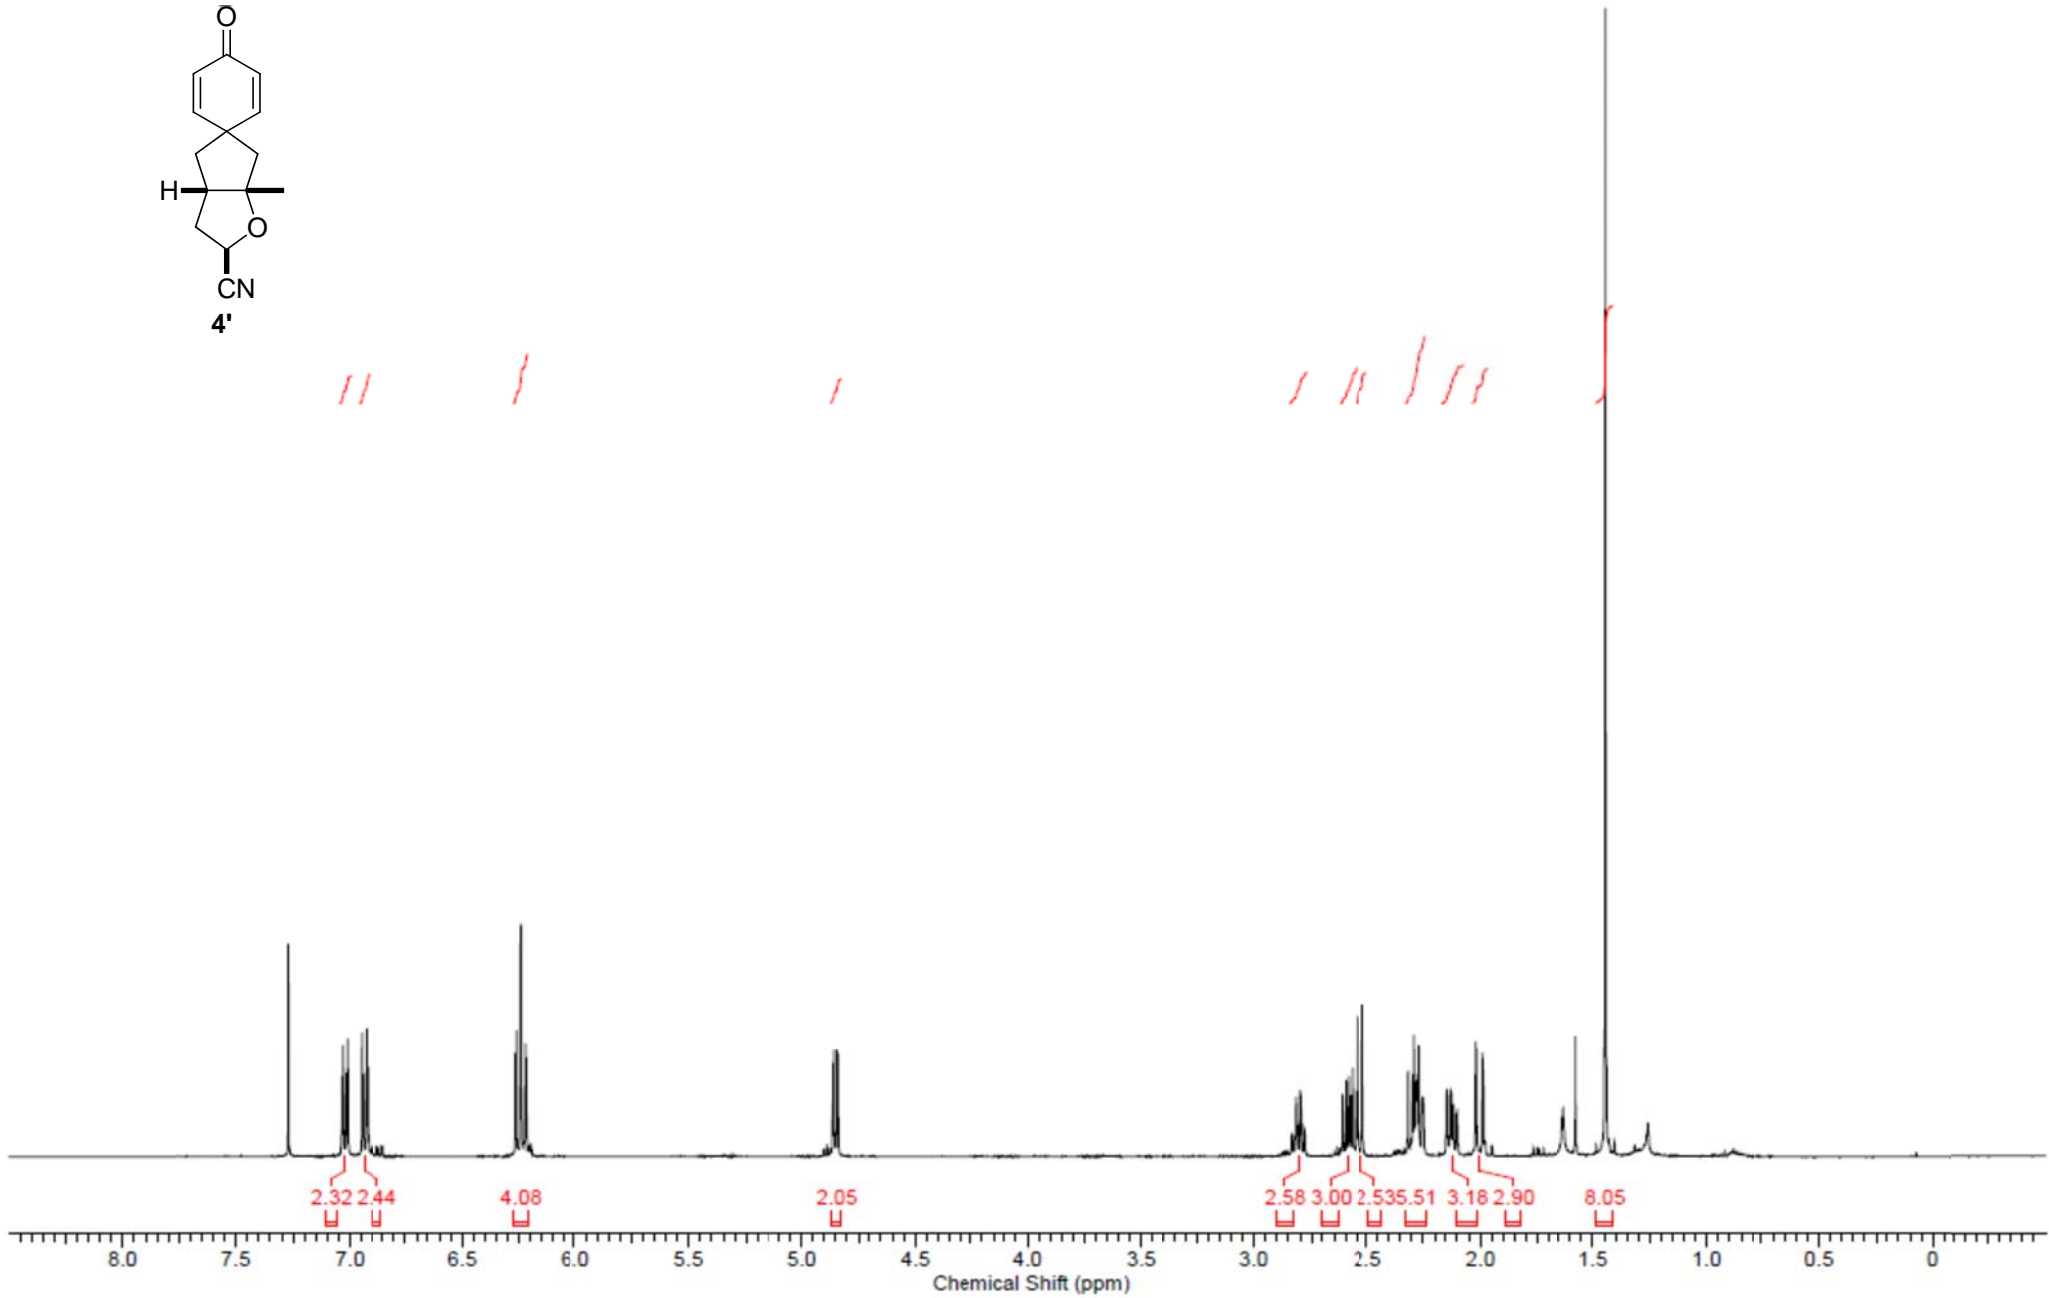

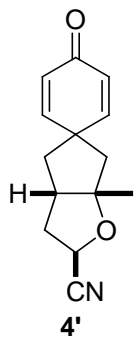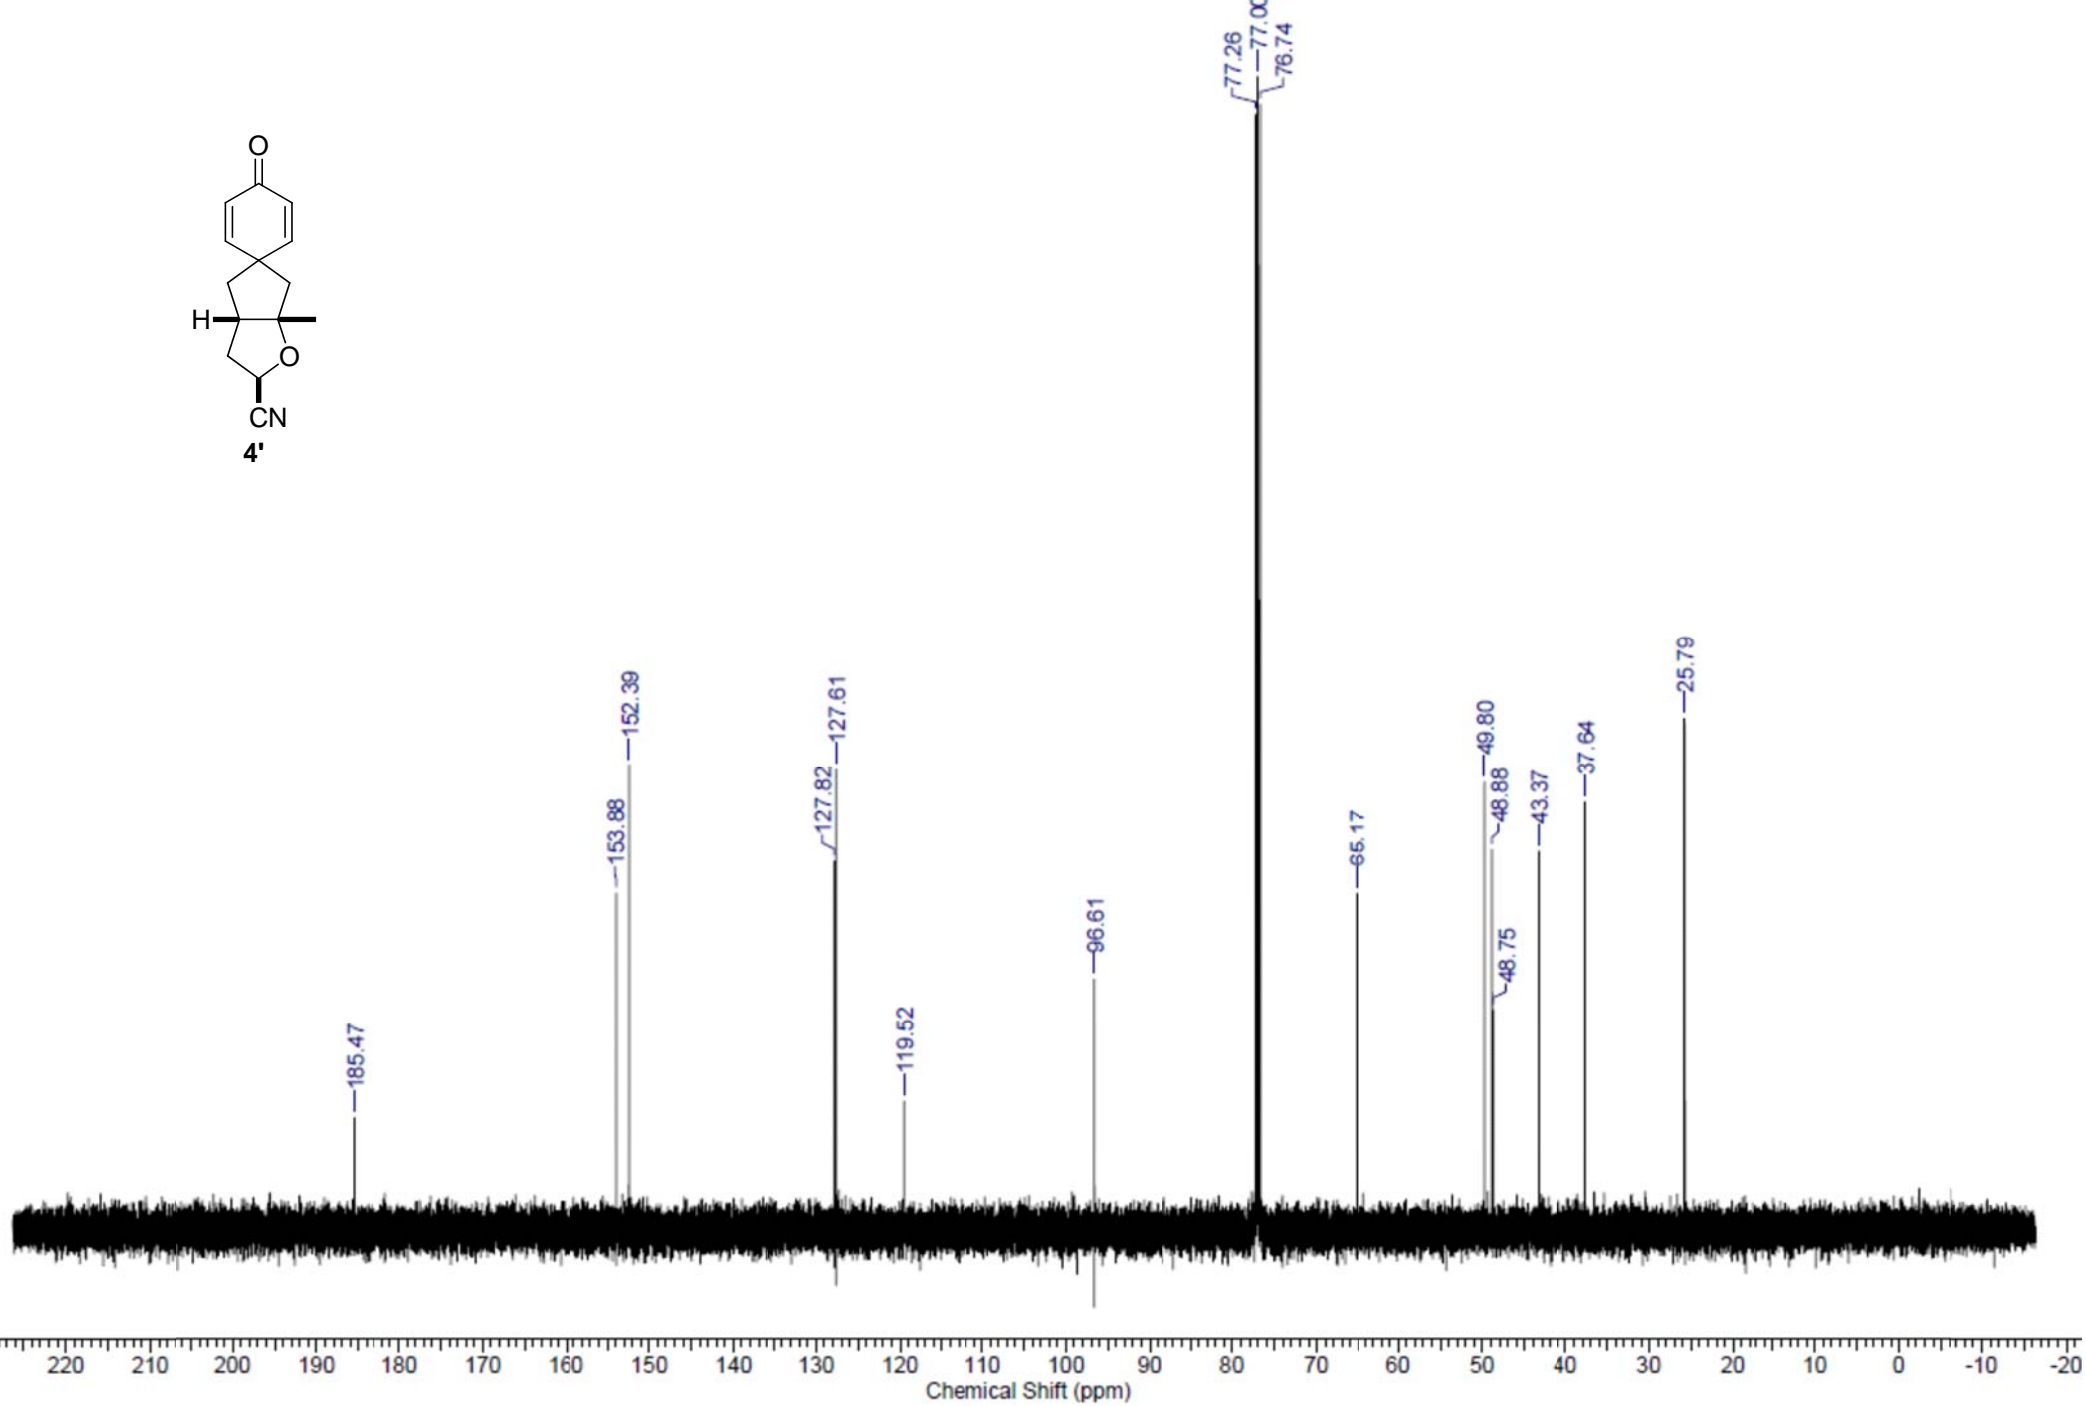



SAMPLE PRESATURATION  
 date Jul 27 2009 satmode n  
 solvent cdcl3 wet n  
 file /home/walkup/~ SPECIAL  
 vnmrsys/data/luca/~ temp 25.0  
 ALI\_20090727\_001/H~ gain not used  
 l\_s2pul\_n\_25C\_02.f~ spin not used  
 id hst 0.008  
 ACQUISITION pw90 10.600  
 sw 8012.8 alfa 10.000  
 at 2.045 FLAGS  
 np 32768 il n  
 fb 4000 in n  
 bs 32 dp y  
 d1 1.000 hs nn  
 nt 8 PROCESSING  
 ct 8 fn not used  
 TRANSMITTER DISPLAY  
 tn H1 sp 526.2  
 sfrq 499.809 wp 3328.6  
 tof 499.8 rfl 1005.5  
 tpwr 62 rfp 0  
 pw 5.300 rp 114.3  
 DECOUPLER lp 0  
 dn C13 PLOT  
 dof 0 wc 250  
 dm nnn sc 0  
 deCwave W40\_HCN5mm vs 398  
 dpwr 34 th 2  
 dmf 32258 ai cdc gh

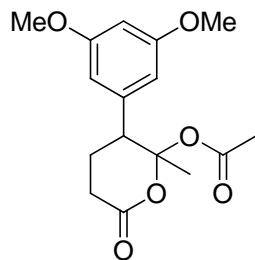

24

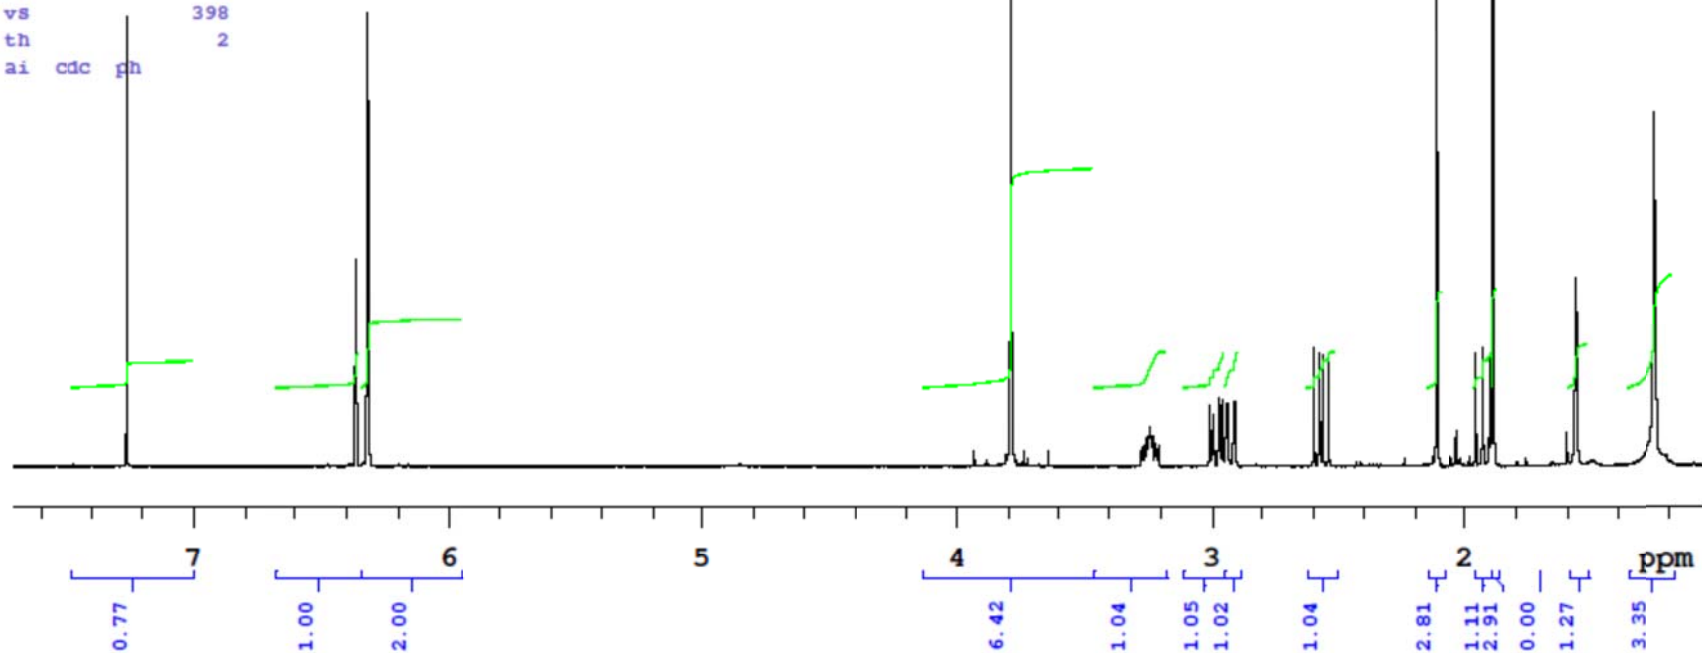

Sample Name:  
ALI  
Data Collected on:  
117t-vnmrs500  
Archive directory:  
/home/walkup/vnmrsys/data/luca  
Sample directory:  
ALI\_20090727\_001  
FidFile: C13\_s2pul\_n\_25C\_01

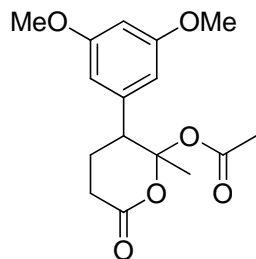

24

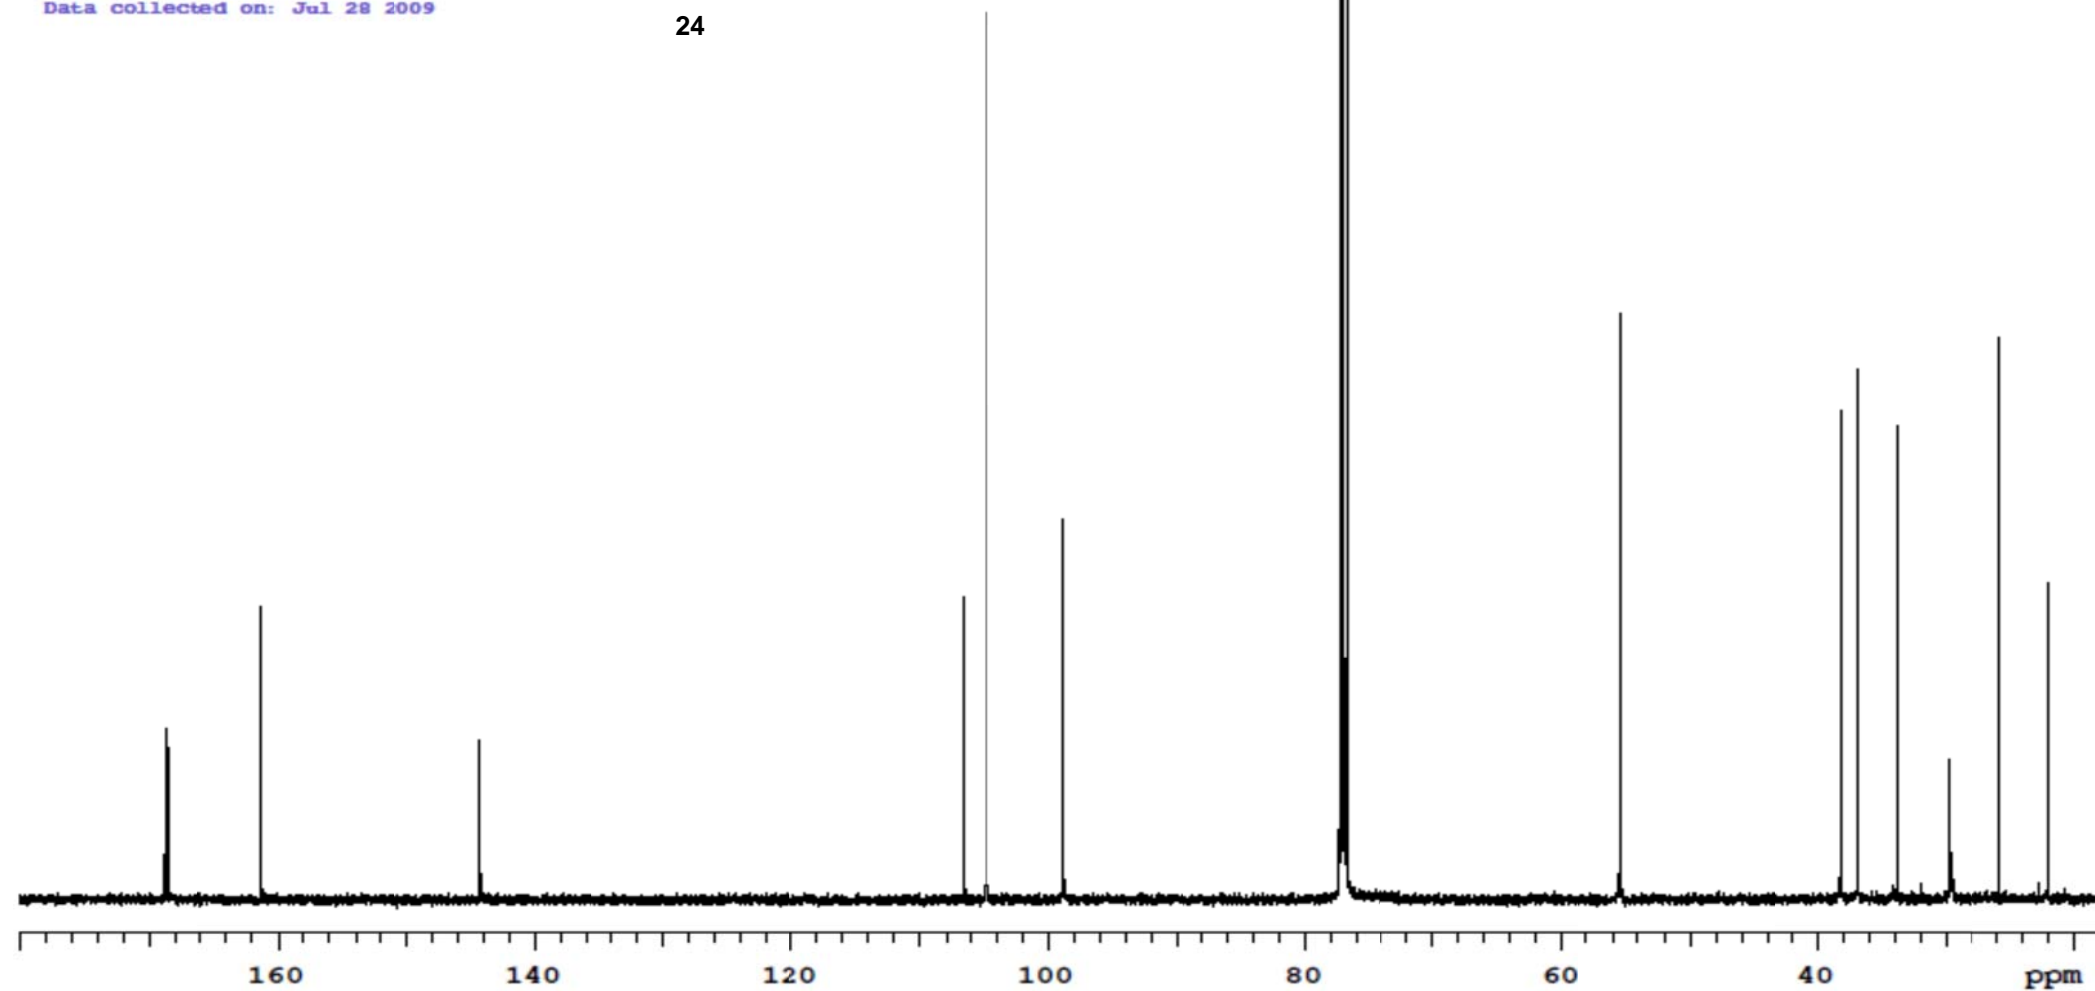

Plotname: --Not assigned--

SAMPLE FLAGS  
 date Jul 27 2009 hs nn  
 solvent cdcl3 sspul y  
 sample AL1\_2009072~ hsglv1 5400  
 7\_001 SPECIAL  
 ACQUISITION temp 25.0  
 sw 8012.8 gain 30  
 at 0.600 spin F2 used  
 np 9616 F2 PROCESSING  
 fb 4000 sb (ppm)  
 ss 32 sbs not used  
 d1 1.000 fn 4094  
 nt 1 F1 PROCESSING  
 2D ACQUISITION sb1 -0.064  
 sw1 8012.8 sbs1 not used  
 ni 512 procl hp  
 d2 0 fn1 4094  
 PRESATURATION DISPLAY  
 satmode n sp -20.7  
 wet n wp 4284.2  
 TRANSMITTER sp1 -136.9  
 tn H1 wp1 3998.5  
 sfrq 499.809 rf1 1005.3  
 tof 499.8 rfp 3  
 tpwr 62 rf11 1005.3  
 pw 10.600 rfp1 0  
 GRADIENTS PLOT  
 gzlv1E 4504 wc 186.0  
 gtE 0.001000 sc 4  
 EDratio 1.000 wc2 143.0  
 gstab 0.000500 sc2 0  
 DECOUPLER vs 183  
 dn C13 th 5  
 dm nnn ai cdc av 5

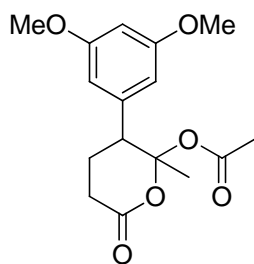

24

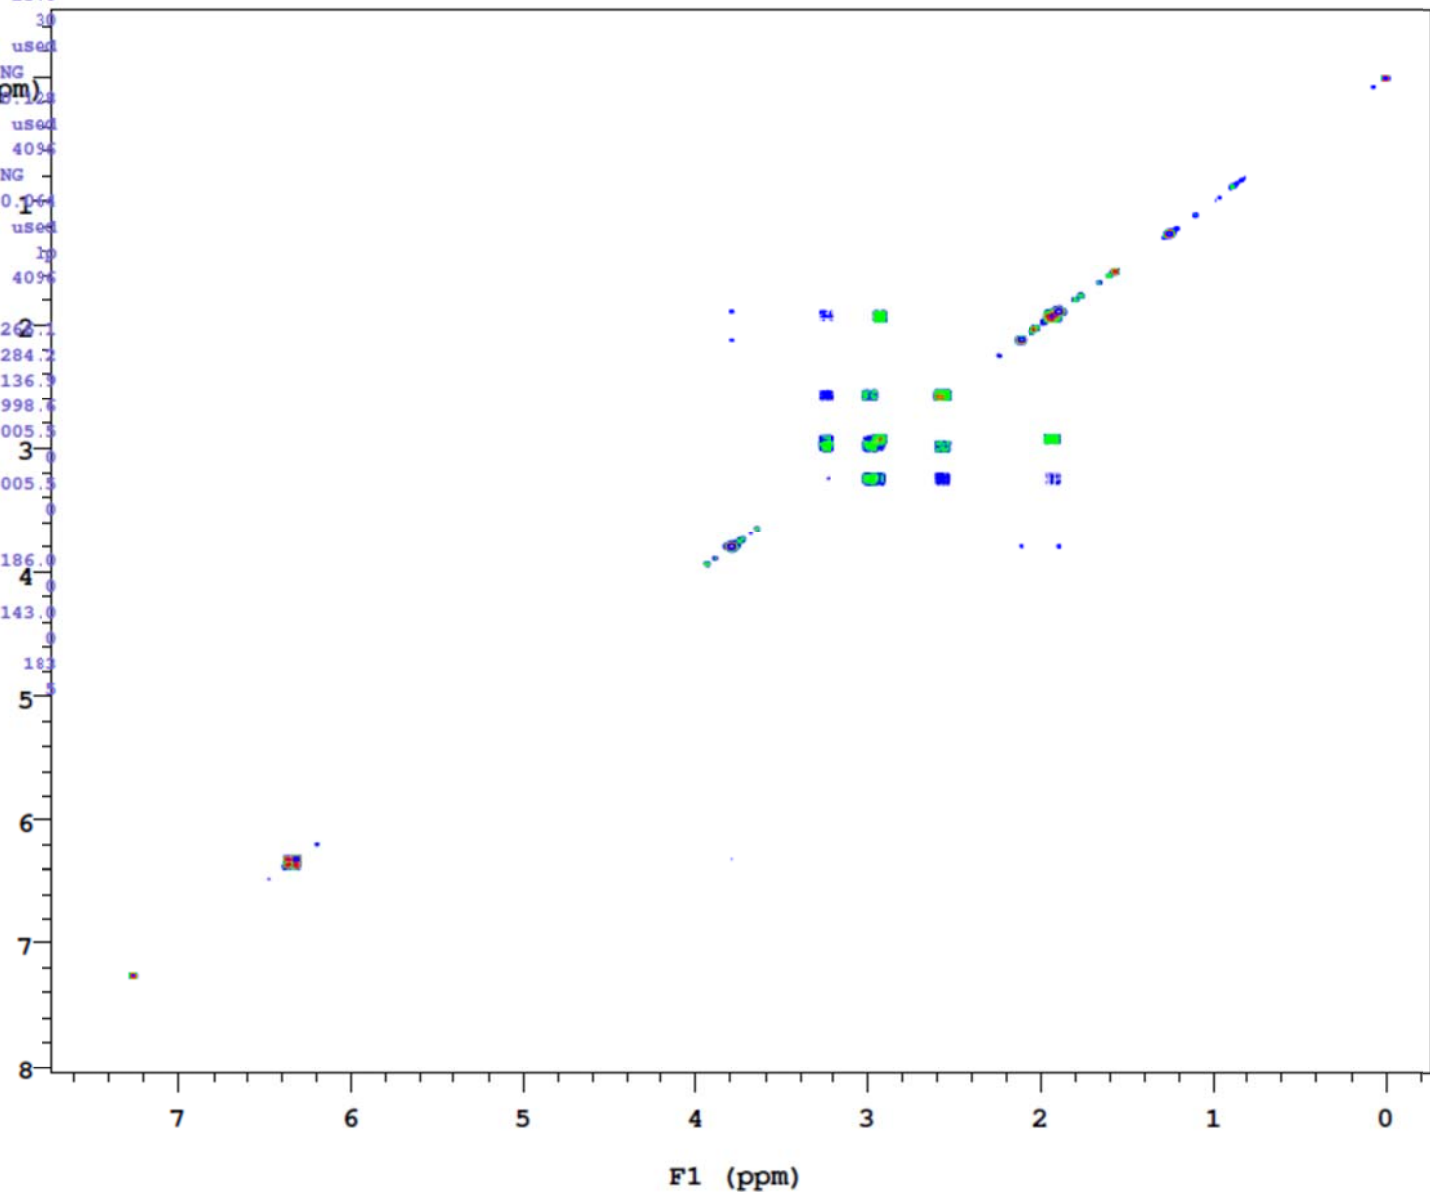

COSY

AL1

Sample Name:  
AL1  
Data Collected on:  
117t-vnmrs500  
Archive directory:  
/home/walkup/vnmrsys/data/luca  
Sample directory:  
AL1\_20090727\_001  
FidFile: C13\_APT\_n\_25C\_01

Pulse Sequence: APT  
Solvent: cdcl3  
Data collected on: Jul 29 2009

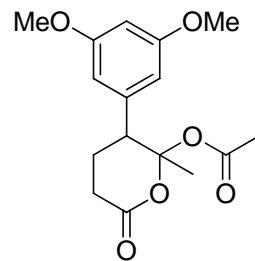

24

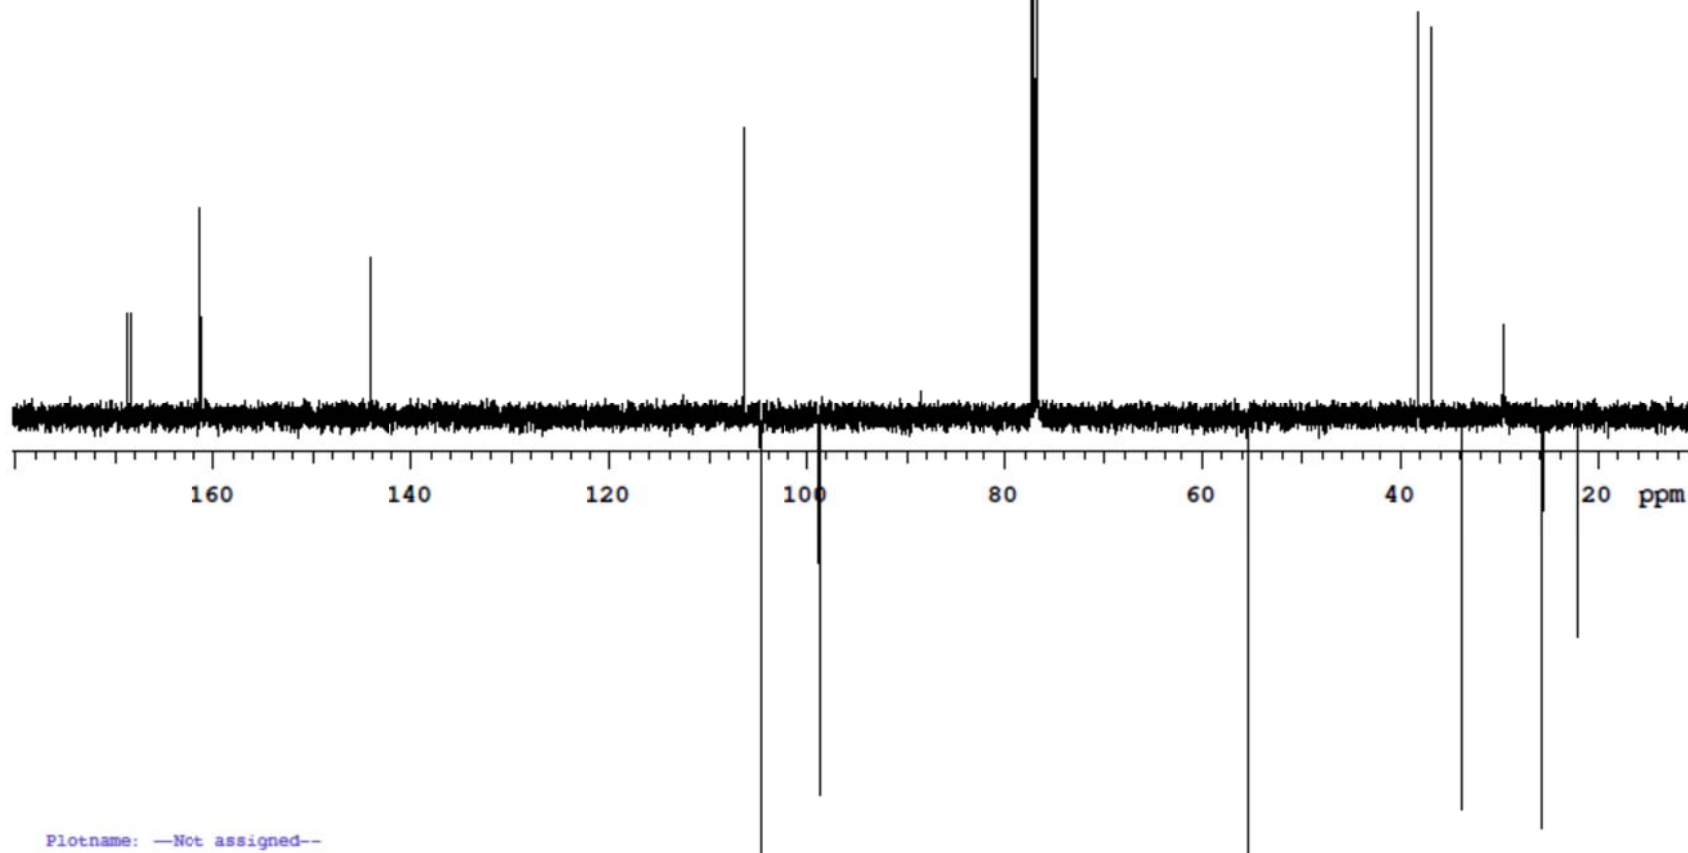

Plotname: --Not assigned--

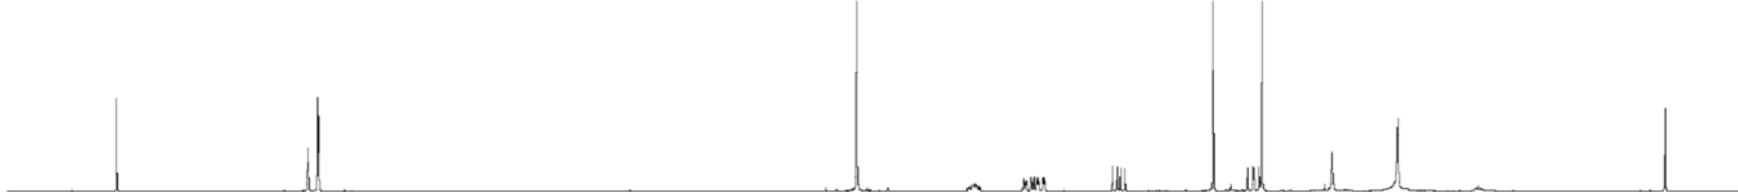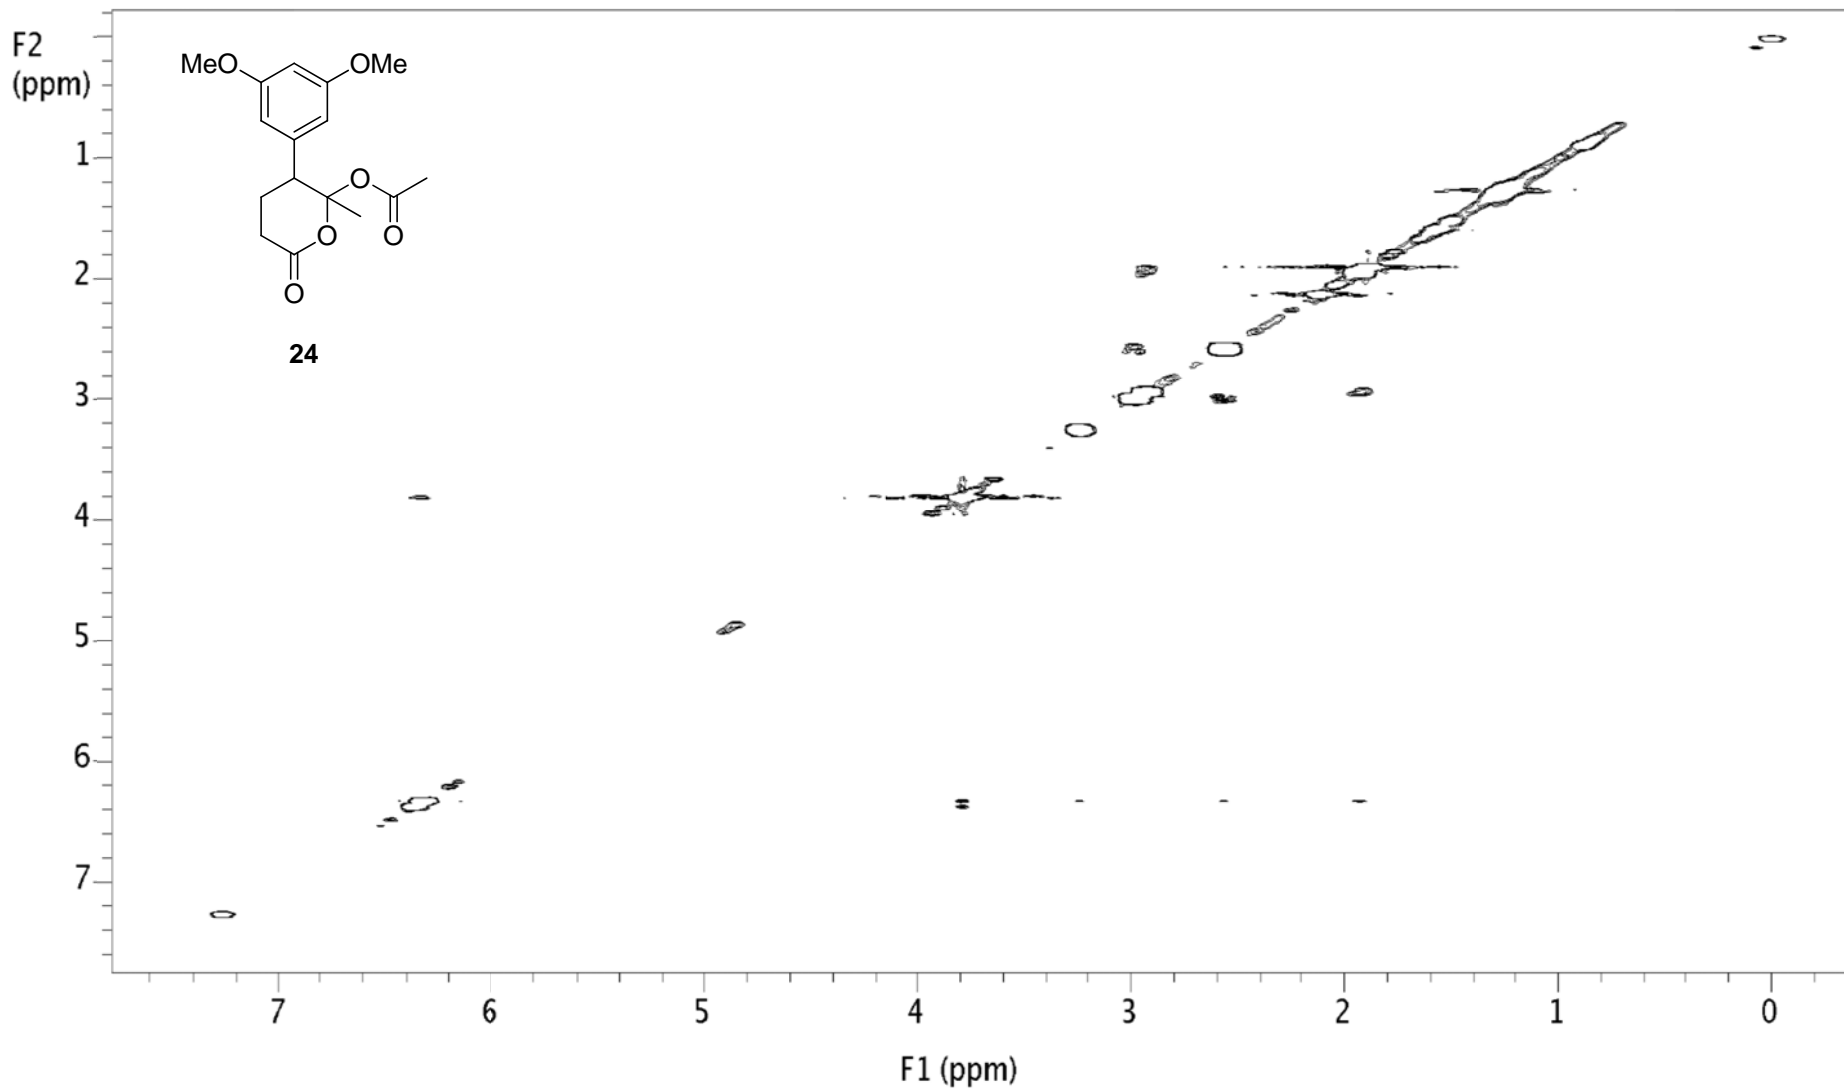

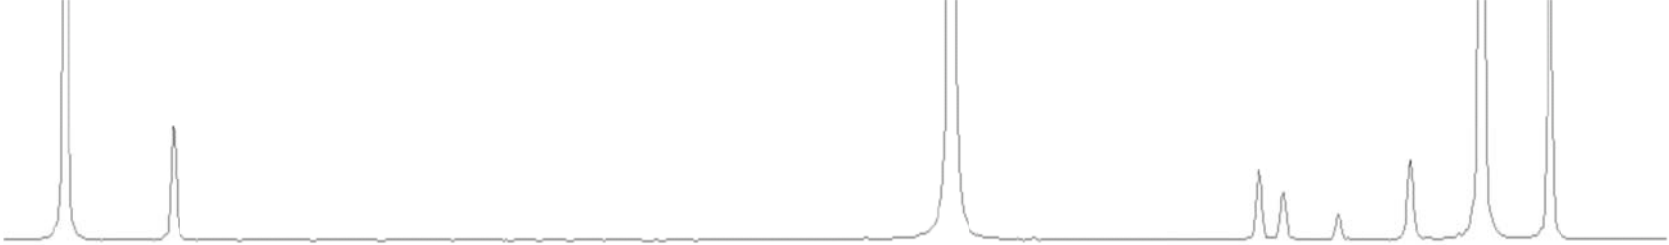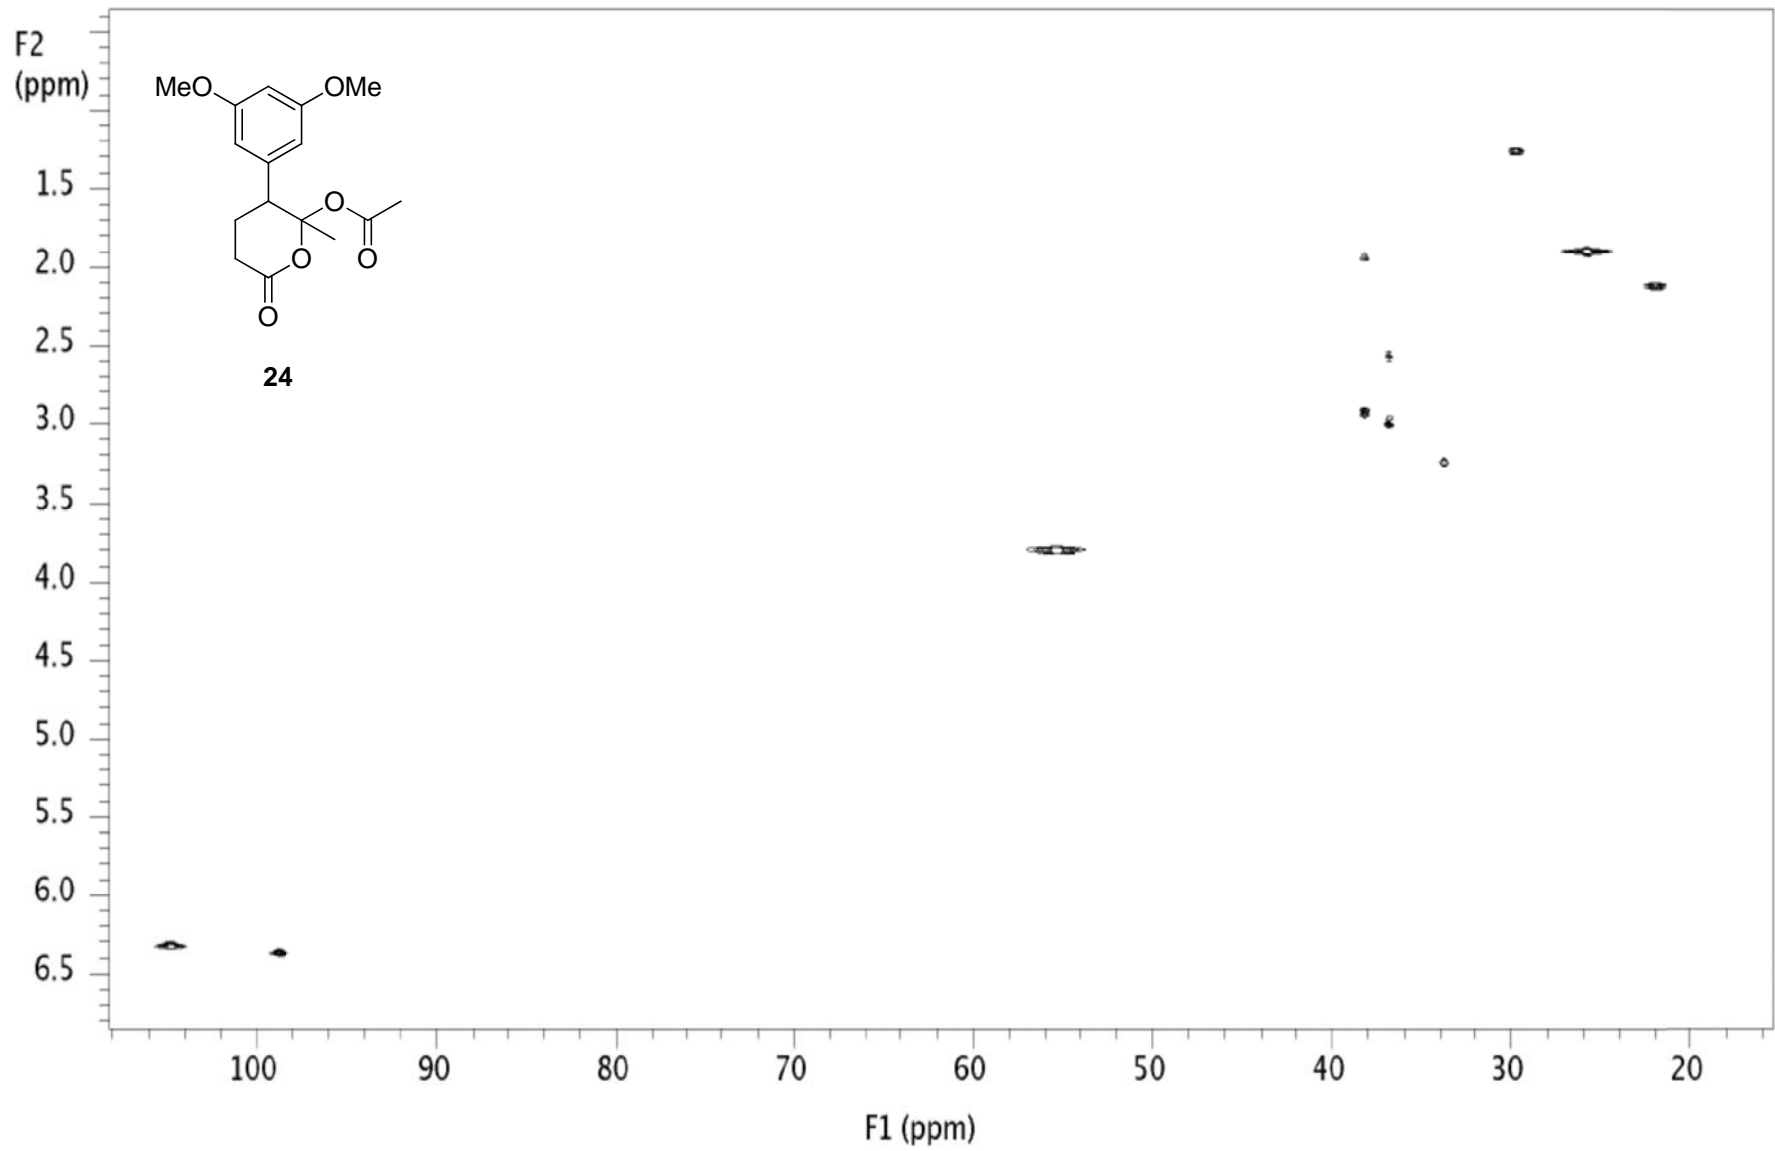

HSQC

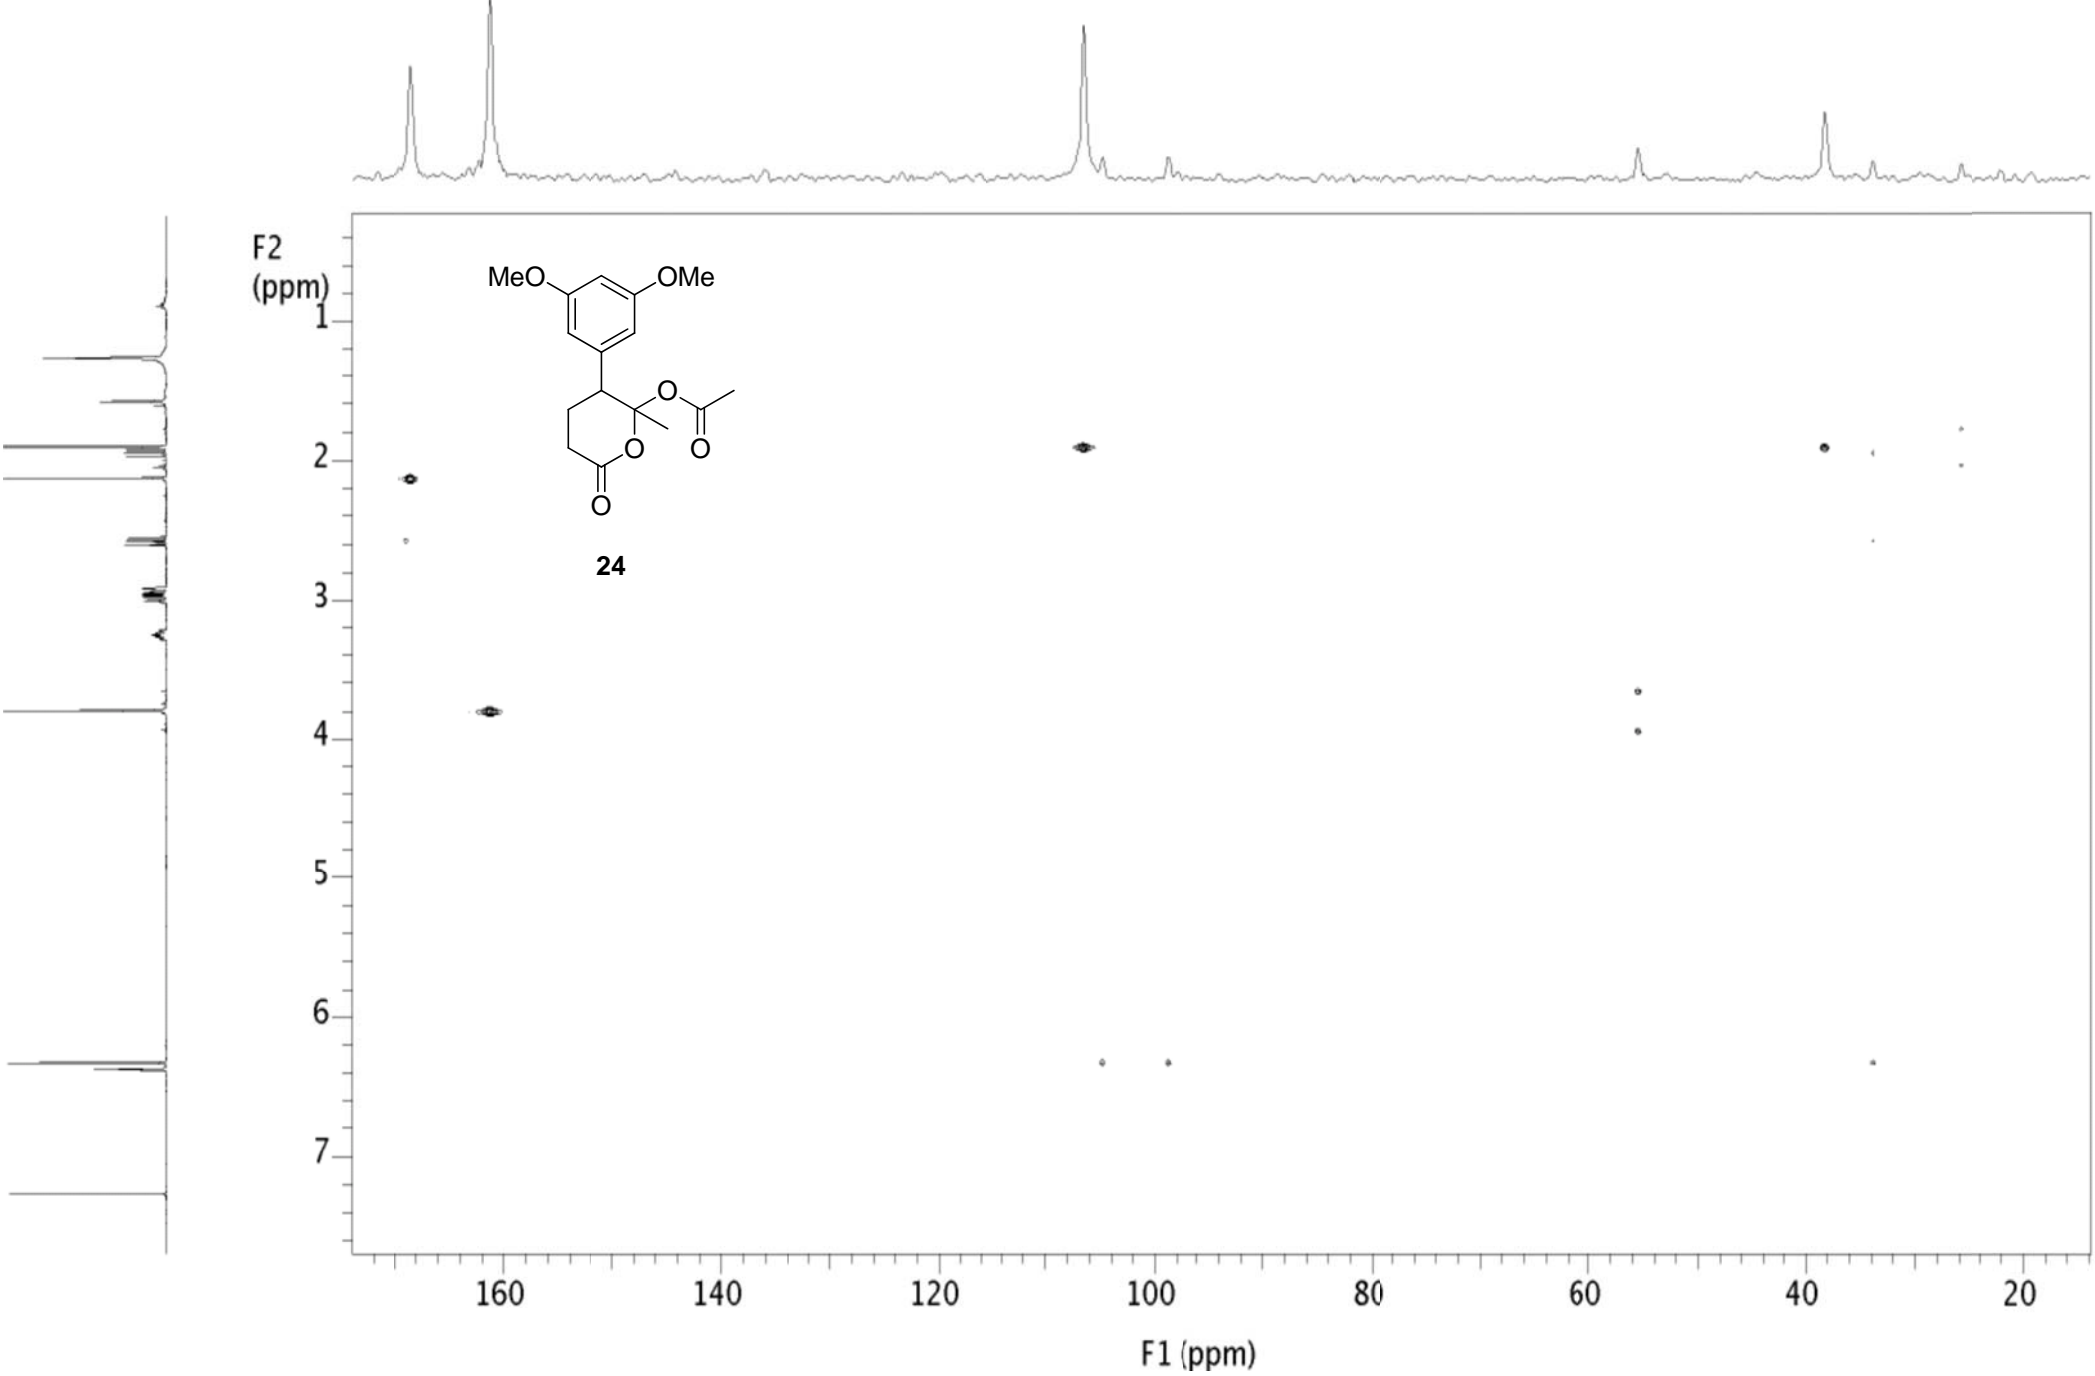

HMBC
